# Supplementary material for: Unlocking the Genetic Diversity and Population Structure of a Wild Gene Source of Wheat, Aegilops biuncialis Vis., and Its Relationship With the Heading Time
Source: Front Plant Sci. 2019 Nov 22;10:1531. doi: 10.3389/fpls.2019.01531 (PMC6882925; doi:10.3389/fpls.2019.01531)
Supplement: Supplementary file 1 [file DataSheet_1.xlsx]

## Sheet: Metadata
Supplementary Data S1 for the manuscript: 'Unlocking the genetic diversity and population structure of a wild gene source of wheat, Ae. biuncialis Vis., and its relationship with the heading time' written by László Ivanizs1a, István Monostori1a, András Farkas1, Mária Megyeri1, Péter Mikó1, Edina Türkösi1, Eszter Gaál1, Andrea Lenykó-Thegze1, Kitti Szőke-Pázsi1, Éva Szakács1, Éva Darkó1, Tibor Kis…

## Sheet: Munka1
MarkerID	Sequence	542166	554171	AE1160/94	AE274/80	AE354/78	AE550/78	AE751/82	AE754/90	AE786/89	AE843/88	AE844/84	AE981/92	AE999/92	MvGB1325	MvGB1326	MvGB376	MvGB377	MvGB379	MvGB380	MvGB381	MvGB382	MvGB409	MvGB470	MvGB600	MvGB635	MvGB642	MvGB702	PI170194	PI177241	PI219797	PI276965	PI344779	PI344786	PI349036	PI362334	PI362336	PI428557	PI483007	PI483013	PI487200	PI487282	PI542160	PI550932	PI550952	PI550965	PI550970	PI550983	PI550997
4303544	TGCAGCCGTCGCACGCCCGAGATCGGAAGAACGGTTCAGCAGGAATGCCGAGACCGATCTCGTATGCCG	1	1	1	-	1	-	1	1	-	-	1	1	1	-	1	1	1	1	1	1	1	1	1	1	1	1	1	1	1	1	1	1	1	1	1	1	1	1	1	1	-	1	1	1	1	1	1	1
4299202	TGCAGCCGTCGCACGCCCGTGATCGGAAGAGCGGTTCAGCAGGAATGCCGAGACCGATCTCGTATGCCG	1	1	1	-	1	-	1	1	-	-	1	1	1	-	1	1	1	1	1	1	1	1	1	1	1	1	1	1	1	1	1	1	1	1	1	1	1	1	1	1	-	1	1	1	1	1	1	1
4268587	TGCAGGGGCTTTCATGTCACCTTCGTCAACTCCGAGTTCAACCACCGAGATCGGAAGAGCGGTTCAGCA	1	-	1	1	1	1	1	1	1	1	1	1	1	1	1	1	1	1	1	1	1	1	1	-	1	1	1	1	1	1	1	1	1	1	1	-	1	1	1	1	1	1	1	-	1	-	-	1
4287751	TGCAGTTCGGTCTCCTTCGCCATTTCGGGTCACCGAGATCAGAAGAGCGGTTCAGCAGGAATGCCGAGA	-	1	1	1	1	1	1	1	1	1	1	1	1	-	1	1	1	1	1	-	-	1	1	1	1	1	1	1	1	1	-	1	1	1	1	1	1	1	1	-	1	1	1	-	1	1	1	1
4328776	TGCAGCTTCCGCATGGTCTCCTCCAGGGGTCGATGCACGCCTTGCTCCACCATCAACCGAGATCGGAAG	1	1	1	1	1	1	1	1	1	1	1	1	1	1	1	1	1	1	1	1	1	1	1	-	1	1	1	1	1	1	-	1	1	1	1	1	1	1	1	1	1	1	1	1	1	1	1	1
4328828	TGCAGCACGCGCACAGGATGCACTCGTACAGCCCGTCCAGCTTCCGCCGCTCGCCCGAGATCGGAAGAG	1	-	1	1	1	1	1	1	1	1	1	1	1	1	1	1	1	1	1	1	1	1	1	-	1	1	1	1	1	1	-	1	1	1	1	1	1	1	1	-	1	1	1	1	-	1	1	1
4283916	TGCAGAGAGGCTACGACCAGGTGGTGCACGACGTGGACCTCCAGAAGCTCCCGAGATCGGAAGAGCGGT	1	-	1	1	1	1	1	1	1	1	1	1	-	1	1	1	1	1	1	1	1	1	1	1	1	1	1	1	1	1	-	1	1	1	-	1	1	1	1	1	1	1	1	1	1	1	1	-
4295382	TGCAGCCCATGCCGCCGAGGTTGAAGCTCCGAGATCGGAAGAGAGGTTCAGCAGGAATGCCGAGACCGA	1	-	1	1	1	1	1	1	1	1	1	1	1	1	1	1	1	1	-	1	1	1	1	1	1	1	1	1	1	1	1	1	-	1	1	-	1	1	-	1	1	1	1	1	1	1	1	1
4297935	TGCAGCTTGAAGACTGCCTTGCCGTCCTCGTAGCTCCGAGATCGGAAGAGCGGTTCAGCAGGAATGCCG	-	-	1	1	-	1	1	1	1	1	1	1	1	1	1	1	1	1	1	1	1	1	1	1	1	1	1	-	1	1	1	1	1	-	1	1	1	1	1	1	1	1	1	1	1	1	1	-
4271300	TGCAGCACCACCACGACTACCTGCCGGCCTTCGACGCCGCCACCGAGATCGGAAGAGCGGTTCAGCAGG	-	1	1	-	1	-	1	1	-	1	1	1	1	-	1	1	1	1	1	0	1	1	1	1	1	1	1	1	1	1	1	1	1	1	1	-	1	1	1	1	1	1	1	1	1	1	1	1
4300573	TGCAGTCGCAGCGCCAAGCTCTCCTCCATCCTCCGAGATTGGAAGAGCGGTTCAGCAGGAATGCCGAGA	1	1	1	1	1	1	1	1	1	1	1	0	1	1	1	1	1	1	1	-	-	1	1	1	1	1	1	1	1	1	1	1	1	1	1	1	1	1	1	1	1	1	1	1	1	1	1	-
4298662	TGCAGGAGGGTGATGCCGCGCGGGTTGCCCGTGCGCCGCCGAGATCGGAAGAGCGGTTCAGCAGGAATG	1	-	1	1	1	1	1	1	1	1	1	1	1	-	1	1	1	1	1	0	1	1	1	1	1	1	1	1	1	1	1	1	1	1	1	-	1	1	1	-	1	1	1	1	1	1	1	1
4277990	TGCAGTACCTCACCGAACTGGACCTTAGCAACAACCTGTTCTCCGAGATCGGAAGAGCGGTTCAGCAGG	1	1	1	1	1	1	1	1	1	1	1	1	1	1	1	1	1	1	-	-	1	1	1	1	1	1	1	-	1	1	-	1	1	-	1	1	1	1	1	1	1	1	1	1	1	1	1	1
4301821	TGCAGAAAAGGAGGTAGGGCGGAGGGGAAGCAGGATGTGATGTGAGAGGGATGATGGGCTAACCGAGAT	1	-	1	1	1	1	1	1	1	1	1	1	1	1	1	1	1	1	1	1	1	1	1	1	1	1	1	-	1	1	-	1	1	1	1	-	1	-	1	1	1	-	1	1	1	0	1	1
4326925	TGCAGTTCACTCCGTTGGAGAAGATCATCAGGGACGCCGTGGAGAGCCTCCGAGATCGGAAGAGCGGTT	1	1	1	1	1	1	-	1	1	1	1	1	1	1	1	1	1	1	1	-	1	1	1	1	1	1	1	1	1	-	-	1	1	1	1	-	1	1	-	1	1	1	1	1	1	1	1	-
4299326	TGCAGTCGAGCTGGGCGCGGGAGATCTCGTAGGTTATGACCCGAGATCGGAAGAGCGGTTCAGCAGGAA	-	1	1	1	1	1	1	1	-	1	1	1	1	1	-	1	1	1	1	1	1	1	1	1	1	1	1	1	1	1	-	1	1	1	1	1	-	1	-	1	1	1	1	1	-	1	1	1
4327016	TGCAGGGCCACATCAACTCCATGCTCCCCTTCGCCGCGGGCCTCCTCGGCGCCGAGATCGGAAGAGCGG	1	1	1	1	1	-	1	1	1	1	1	1	1	1	-	1	1	-	1	1	1	1	1	1	1	1	1	1	1	1	-	1	-	1	-	1	1	1	1	1	1	1	1	1	1	1	1	1
4273601	TGCAGGAGCCGCACGATCTCGTGCTTGTGCTCCGAGATCTGAAGAGCGGTTCAGCAGGAATGCCGAGAC	-	1	1	1	1	1	-	1	1	1	1	1	1	1	1	-	1	1	1	1	1	1	1	1	1	1	1	1	-	1	1	1	1	1	1	1	1	1	1	1	1	1	1	1	1	1	1	1
4271969	TGCAGGCAACAAATTCCTGTGTGGCAAGCCAACGGACGTGGTCTGCGAATCCGCGTCGTCGCCCGCCGA	1	-	1	1	1	1	1	1	1	1	1	1	1	1	1	1	-	1	-	1	1	1	1	1	-	1	1	1	1	1	-	1	1	1	1	-	1	1	1	1	1	1	1	1	1	-	1	-
4295393	TGCAGCAGCATCGCGTAGAGGATGTGGTTCCAGGCGTCCGAGATCGGAAGAGCGGTTCAGCAGGAATGC	1	1	1	1	1	1	1	1	1	1	1	-	-	1	1	1	1	1	1	1	1	1	1	1	1	1	1	1	1	1	1	1	1	1	1	1	1	1	1	1	1	-	1	1	1	1	-	1
4263682	TGCAGCCTCATCGCATCAGCCTGGACCTGGAGCTGCTGCTCCCTTGCCCGTGAAGAAGACTGCCGCTCC	1	-	1	1	1	1	1	1	1	1	1	-	1	1	1	1	-	1	1	1	1	1	1	1	-	0	1	1	1	1	1	1	1	1	1	1	1	1	1	1	1	1	1	1	1	1	1	-
4284229	TGCAGTCGTCGATGCACAGCTGCCGAGATCTGAAGAGCGGTTCAGCAGGAATGCCGAGACCGATCTCGT	1	1	1	-	1	1	1	1	-	1	1	1	1	1	1	1	1	1	1	1	1	1	1	1	1	1	1	1	1	1	1	1	1	1	1	1	1	1	1	-	1	-	1	1	1	1	1	1
4294391	TGCAGGATGATGCTTTTGCACAATAAACTCACTAACAGCAACCGAGATCGGAAGAGCGGTTCAGCAGGA	-	-	1	1	1	1	-	1	-	1	1	1	1	1	1	1	-	1	1	1	1	1	1	1	1	1	1	1	-	1	1	1	1	1	-	1	1	1	1	1	1	-	1	1	1	1	1	1
4285620	TGCAGCAGATGCTCGGCGTCTACGACGAGATCCTGGCCAAGAACCAGTACCTCGCCGAGATCGGAAGAG	1	1	1	1	-	1	1	1	1	1	1	1	1	1	1	1	1	1	1	1	1	1	1	1	1	1	1	1	1	1	1	1	1	1	1	-	-	1	1	-	1	1	1	-	1	-	1	1
4304209	TGCAGCAACACGGTCTTGAGCAGGAAGTTCTTGACAATCTCCGAGATCGGAAGAGCGGTTCAGCAGGAA	1	1	1	1	1	1	1	-	1	1	1	1	1	1	1	1	1	1	1	-	1	-	1	1	1	1	1	1	1	1	-	1	1	1	1	1	1	1	1	1	1	-	-	1	1	1	1	-
4276543	TGCAGAAATGCGGCGTCGGCGGAGAGCAGCCGAGAACGGAAGAGCGGTTCAGCAGGAATGCCGAGACCG	1	1	-	-	1	1	1	1	1	1	1	1	1	-	1	1	1	1	1	-	1	1	1	1	1	1	1	1	1	1	1	1	1	1	1	1	1	1	1	1	-	1	1	-	1	1	1	1
4277587	TGCAGAAATGCGGCGTCGGCGGAGAGCAGCCGAGATCGGAATAGCGGTTCAGCAGGAATGCCGAGACCG	1	1	-	-	1	1	1	1	1	1	1	1	1	-	1	1	1	1	1	-	1	1	1	1	1	1	1	1	1	1	1	1	1	1	1	1	1	1	1	1	-	1	1	-	1	1	1	1
4270801	TGCAGACGCCGAGCGAGGTTGATCTGCTGGACGACGGCTACCGAGATCGGAAGAGCGGTTCAGCAGGAA	1	-	1	1	1	1	1	-	1	1	1	1	1	1	1	1	1	1	1	1	1	1	1	-	1	1	1	1	1	-	1	1	1	1	1	1	1	1	1	-	1	1	1	1	1	1	1	1
4299043	TGCAGGTGTATCCAGTTCATCATGATCCGCATGCCAATCCGAGATCGGAAGAGCGGTTCAGCAGGAATG	-	-	1	1	1	1	1	1	1	1	1	1	1	1	1	1	1	1	1	1	1	1	1	1	1	1	1	-	1	1	1	-	1	1	1	1	1	1	1	1	-	1	-	1	1	1	-	1
4297877	TGCAGGTTGTCTATGATTGATTGCAAAACGATCCGAGATCTGAAGAGCGGTTCAGCAGGAATGCCGAGA	1	0	1	1	1	-	-	1	-	1	-	1	1	1	1	-	1	1	1	-	-	1	1	1	1	1	1	1	1	1	1	1	1	1	1	1	1	1	1	1	1	1	1	1	1	1	-	1
4267370	TGCAGGTTGTCTATGATTGATTGCAAAACGATCCGAGATCGGAATAGCGGTTCAGCAGGAATGCCGAGA	1	0	1	1	1	-	-	1	-	1	-	1	1	1	1	-	1	1	1	-	-	1	1	1	1	1	1	1	1	1	1	1	1	1	1	1	1	1	1	1	1	1	1	1	1	1	-	1
4271022	TGCAGCTTCGCGGGCAAGGAACTCTGCGATGCTGATCCTCTCGAGGGAGCCACGCACCTCGCCAATCTC	1	1	-	1	1	1	1	1	1	1	1	-	1	1	1	1	1	1	-	1	1	1	1	1	1	1	1	1	1	-	-	1	1	-	1	1	1	1	1	1	1	1	1	1	1	1	1	1
4266522	TGCAGTTGGCCAGGCACAGCTGTCTGCACTCGTCCAGCGTCATGTCGGCGTGCACCGTCGCGTTAGTCG	1	1	1	1	1	1	1	-	1	1	1	-	1	1	1	1	1	1	1	1	1	1	1	1	1	1	1	1	1	-	1	0	1	1	1	1	1	1	1	1	1	1	1	1	1	1	1	-
4279000	TGCAGGCGCAGAGGAGCAGTATGGTCCTCGACAGCACCGAGATCGGAAGAGCGGTTCAGCAGGAATGCC	1	1	1	1	1	-	1	-	-	1	-	1	1	1	1	1	1	1	1	-	1	1	1	1	1	1	1	1	1	1	1	1	-	1	1	1	1	-	1	-	1	1	1	1	1	1	1	1
4265496	TGCAGGCCGTCTACTCCAGCATGCGCGGCCTCGTCCGAGATCGGAAGAGCGGTTCAGCAGGAATGCCGG	-	-	1	1	1	1	1	1	-	-	1	1	1	1	1	1	-	1	1	1	1	1	1	1	1	1	-	1	1	1	1	1	1	1	1	1	1	1	1	1	1	1	1	-	1	1	1	1
4276522	TGCAGCCAGGCGGGCACCGATTTCCTGGCAATAGTTTACTCCGAGATCGGAAGAGCGGTTCAGCAGGAA	-	0	-	1	1	1	1	1	1	1	1	-	1	1	1	1	1	1	1	-	1	1	1	1	1	-	1	1	1	1	1	1	1	1	1	1	1	1	1	1	1	1	1	1	1	1	1	-
4299538	TGCAGCTCGGAATCACTCGGAAACGGCGACGCTTGGGCCTGGGCCTGGGCCGAGATCGGAAGAGCGGTT	1	-	-	1	1	1	1	0	-	1	-	-	1	1	1	1	-	1	1	1	1	1	1	1	1	-	1	1	1	1	1	1	1	1	1	1	1	1	1	1	1	1	1	1	-	1	1	1
4281009	TGCAGTACTGGATGGACGAGAACTACGTCTACAATTGCTTCGCGAGCACCGAGATCGGAAGAGCGGTTC	1	-	1	1	1	1	1	1	1	1	1	1	1	-	1	1	1	1	0	1	1	1	1	-	1	1	-	1	1	1	-	1	1	1	1	1	1	1	1	-	1	1	-	-	1	1	1	1
4280342	TGCAGCCGCCGCACCACCGACTGCCCGTCCGCGCCACGCGCAGCCGCCGAGATCGGAAGAGCGGTTCAG	-	-	1	1	1	1	1	1	1	1	-	1	1	1	1	1	1	1	1	1	1	1	1	1	1	1	1	1	1	-	0	1	1	1	-	1	1	1	1	1	1	1	-	1	1	-	1	-
4265457	TGCAGGAGATGGCCTTCTCCTGCGGCGACGACGTCAGAGGAGGCTACCCGAGATCGGAAGAGCGGTTCA	1	-	1	1	1	1	1	1	1	1	1	1	1	1	1	1	1	1	1	1	1	1	1	1	1	1	1	1	1	1	-	1	1	1	1	-	1	1	1	1	1	1	1	1	1	1	1	1
4282727	TGCAGAACCAGCCGAGTAATGGTTACATCTCACCGAGATCTGAAGAGCGGTTCAGCAGGAATGCCGAGA	-	-	1	1	1	1	1	1	1	1	1	-	1	1	1	1	-	1	1	-	1	1	1	1	1	1	1	1	1	1	1	1	1	1	1	1	-	-	-	1	1	-	1	1	1	1	-	-
4296300	TGCAGGGCGGCGGGCTTCTGGTTGGCCGCCTTGCCGTGGAGGATCTTGGAGAGCAGCAGCCGAGATCTG	1	-	-	1	1	-	1	1	1	1	1	-	1	1	1	1	1	1	1	1	1	1	1	1	1	1	1	1	1	1	1	-	1	1	1	1	1	1	1	1	1	1	0	1	1	1	-	1
4266413	TGCAGGGCGGCGGGCTTCTGGTTGGCCGCCTTGCCGTGGAGGATCTTGGAGAGCAGCAGCCCAGATCGG	1	-	-	1	1	-	1	1	1	1	1	-	1	1	1	1	1	1	1	1	1	1	1	1	1	1	1	1	1	1	1	-	1	1	1	1	1	1	1	1	1	1	0	1	1	1	-	1
4295243	TGCAGCTGGTGCCCTCGTCGTCCATGGATTTCGCAGGTGACCGAGATCGGAAGAGCGGTTCAGCAGGAA	1	-	1	1	1	1	1	-	1	1	1	-	1	1	1	1	1	1	1	1	1	1	1	-	1	1	1	1	1	-	-	1	1	1	-	1	1	1	1	1	1	1	1	1	-	1	-	-
4325877	TGCAGTCCACCCAGGAGGAGGAGCAGATCGACACCCAGCTCAAGGGCAAGGCCTCATCCGAGATCGGAA	1	-	1	1	1	1	1	1	1	1	1	1	1	1	1	1	1	1	1	1	1	1	1	1	-	1	1	1	1	-	1	1	1	1	1	1	1	1	1	1	1	1	1	1	1	-	1	1
4307092	TGCAGGAACGACGGGTCCGCGGAGTAGGCGCCCACCGCGCCCCGAGATCGGAAGAGCGGTTCAGCAGGA	1	1	1	1	1	1	1	1	1	1	1	1	1	-	1	1	1	1	1	1	1	1	1	1	1	1	1	-	1	1	-	1	1	1	1	1	1	1	1	1	1	1	1	1	1	1	1	1
4275369	TGCAGGAACGACGGGTCCGCGGAGTAGGCGCCCACCGCGCTCCGAGATCGGAAGAGCGGTTCAGCAGAA	1	1	1	1	1	1	1	1	1	1	1	1	1	-	1	1	1	1	1	1	1	1	1	1	1	1	1	-	1	1	-	1	1	1	1	1	1	1	1	1	1	1	1	1	1	1	1	1
4266253	TGCAGACTGGATGTTGGAGTGTGACGGAAGAAGTTGTTCTCCTTGAGGACATCCGAGATCGGAAGAGCG	1	1	1	1	1	1	1	-	1	1	1	1	1	1	1	1	1	1	1	-	1	1	1	1	1	-	1	1	1	1	1	1	1	1	1	1	1	1	1	1	1	1	1	1	1	1	1	1
4268620	TGCAGTCTACGTCATGATGAAAGCCATGCTGTCGGCGAACAAGGTGAAATCCGAGCCGAGATCGGAAGA	1	-	1	1	1	1	1	-	1	1	1	-	1	1	1	-	1	1	1	1	1	-	1	1	1	1	1	1	1	1	1	1	1	1	1	1	1	1	-	-	1	1	1	1	1	1	1	1
4272763	TGCAGACCGTAGAAAGTGAAGTTGGCGCGCGGGAGGAGCATGTCCTCGGCGTTGCAGGCCACCATGAGC	1	1	1	1	1	1	1	1	1	1	1	1	1	1	1	1	1	1	1	-	1	1	1	1	-	1	-	1	1	1	1	-	1	1	-	1	1	1	1	1	1	1	1	1	-	1	1	1
4287816	TGCAGCGTCTTCATCTGACCGACCTCTCGCGGGATCTCGCCGAGATCGGAAGAGCGGTTCAGCAGGAAT	1	-	-	1	1	1	1	0	-	1	-	1	1	1	1	1	1	1	1	1	1	1	1	1	1	1	1	1	1	1	1	1	1	1	1	1	1	1	1	1	1	1	1	1	1	1	1	1
4287979	TGCAGTTTCTGAGATTTGTTGTTCAGTGGGCACGCCGAGATCGGAAGAGCGGTTCAGCAGGAATGCCGA	1	-	1	1	-	1	-	1	1	1	-	-	1	1	1	1	1	1	-	1	1	1	1	1	1	1	1	1	1	-	-	1	1	1	1	-	1	1	1	1	1	1	1	1	1	1	1	-
4282842	TGCAGGAGCAGGGCGCGCCGAGATCGAAAGAGCGGTTCAGCAGGAATGCCGAGACCGATCTCGTATGCC	1	-	1	-	1	1	1	0	1	-	-	1	1	-	1	1	1	1	1	1	1	1	1	1	1	1	1	1	1	1	1	1	1	1	1	1	1	-	1	1	-	1	1	-	1	1	1	-
4272015	TGCAGTGGTCCGACGAGTGCTTGGTGAGCGCGGCGATCTGCGCCGAGATCGGAAGAGCGGTTCAGCAGG	1	1	1	1	1	1	1	1	1	-	1	1	1	-	-	1	1	1	-	0	1	1	-	1	1	1	1	1	1	1	1	-	1	1	1	1	1	1	1	1	1	1	1	1	1	1	1	1
4290123	TGCAGCGCTTCCTCCCCGACACCGAGAAGACCATCGACGGCCGAGATCGGAAGAGCGGTTCAGCAGGAA	1	1	1	1	1	1	1	1	1	1	1	1	1	-	1	1	1	1	1	1	1	1	1	1	1	1	1	1	1	1	1	1	-	1	1	-	1	1	1	1	-	1	1	-	1	1	1	1
4278371	TGCAGGGCGAGACCCAGGCACATCAGGGCCCGCCGCCGTACCGAGATCGGAAGAGCGGTTCAGCAGGAA	1	1	1	1	1	1	1	1	1	1	1	1	1	-	1	1	1	1	1	1	1	1	1	1	1	1	1	-	1	1	1	1	1	1	1	1	1	-	1	-	1	1	1	1	1	0	1	1
4292588	TGCAGGAGCATGTATTGATTAGCGCAGACCGACCGAGATCGCAAGAGCGGTTCAGCAGGAATGCCGAGA	1	1	1	1	1	1	1	-	1	1	1	1	1	1	1	1	1	1	1	1	1	1	1	-	1	1	1	1	1	1	1	1	1	1	-	1	1	1	1	-	1	1	1	1	1	1	1	1
4293412	TGCAGGCCCAGCGCGCCCAGCGCCTGGTACACGGACTTCATCGCCGAGATCGGAAGAGCGGTTCAGCAG	1	1	1	1	1	1	1	1	1	1	1	1	1	1	1	1	1	1	1	1	1	1	1	1	1	1	1	1	1	1	1	1	1	1	1	-	1	1	1	1	-	1	1	1	1	1	-	1
4267822	TGCAGGGGGAGATCCCGGCCAGCCTGACGCGGATGCCGAGATCGGAAGAGCGGTTCAGCAGGAATGCCG	1	1	1	1	1	1	1	1	-	-	1	-	1	1	1	1	1	1	1	1	1	1	1	1	1	1	1	1	1	1	0	1	1	1	1	1	1	1	1	1	-	1	1	1	1	1	-	1
4288960	TGCAGCAGTGCCGTGCTCTGGAAGATGATCTCCACCGAGGTGTTGTACCGAGATCGGAAGAGCGGTTCA	1	1	1	1	1	1	1	1	1	1	1	1	1	-	1	1	1	1	1	1	0	1	1	1	1	1	1	1	1	-	1	1	1	1	-	-	1	1	1	1	1	1	1	1	1	1	-	1
4294106	TGCAGGCGATGCTTGCTCATTGCCCATCCCTGGAGTGCGCAAAGCTCAAGAACATCACCGAGATCGGAA	1	-	1	1	1	1	1	1	1	1	1	1	1	1	1	1	1	-	-	1	1	1	1	-	1	1	1	1	1	-	1	1	1	-	1	1	1	1	1	-	1	1	1	1	1	1	-	1
4274039	TGCAGCGCAGGAATTCGGGCTGCCCCTGCTGCCGCCGTCCAAGGCCAATCGCTCCGACTTGAGTCACGG	1	-	1	1	1	1	1	1	1	1	1	-	1	1	1	1	1	1	-	1	1	1	1	1	1	1	1	1	1	1	1	1	1	-	-	1	1	-	1	1	1	1	1	1	1	1	1	1
4285889	TGCAGGAGGTCGAGCACCTTCACCCGCTCCTCCATGGGGAGGCTCATGATCCGCCTCGCGCAGTCACGC	1	1	1	1	1	-	1	1	1	1	1	1	1	1	1	1	1	1	1	1	1	1	1	1	1	1	-	1	1	1	1	1	1	1	-	1	1	1	1	1	1	1	1	1	-	0	1	-
4312970	TGCAGAAGTTCTTCCAGGCGCAGAGCAAGGTCTGGGCCATGACCTTCATCTCCGAGATCGGAAGAGCGG	1	-	1	1	1	1	1	1	1	-	1	1	1	1	1	1	1	1	1	0	-	1	1	1	1	-	1	1	1	1	1	1	1	1	1	1	-	1	1	1	1	1	1	-	1	1	1	1
4302614	TGCAGGTACAGCGCCGCCATCATCTCCTTCTCGTTCTCCCGAGATCGGAAGAGCGGTTCAGCAGGAATG	-	1	1	1	1	1	1	1	1	1	1	1	1	1	1	1	-	1	0	1	1	1	1	-	1	1	-	1	1	1	1	-	1	1	1	-	1	1	1	1	1	1	1	1	1	1	1	1
4276063	TGCAGCAAGCTGGAGGCGCTCTTGCTCTCCTCCAACCTGTTGGATGACGTCATCCCGCCGAGATCGGAA	1	-	-	1	1	1	1	0	1	1	1	1	1	1	1	1	1	1	1	-	1	1	1	1	1	1	1	1	1	-	1	1	1	-	1	1	1	1	1	-	1	1	1	1	1	1	1	1
4294871	TGCAGCATCGCCGCGTCGGTGCGGAGGAAGAAGAAGTTTGTGAGCCCGAGATCGGAAGAGCGGTTCAGC	1	1	1	1	-	1	1	1	1	1	1	-	-	1	1	1	1	1	1	1	1	1	-	1	1	1	1	1	1	1	-	1	1	1	0	-	1	1	1	1	1	1	1	1	1	1	1	1
4292257	TGCAGAGAACGCCAGGGTCTTGCTGGACGCGGCCACCGCGTGGTACACCTGCCCGAGCGTCGCGCCGAG	1	1	1	1	1	-	1	1	-	1	1	1	1	1	1	1	1	1	1	1	1	1	1	1	1	-	1	1	1	1	1	1	1	-	1	1	1	1	-	-	1	1	1	1	1	1	1	1
4297615	TGCAGTGCACGAGAACGGGGTGGCGTGCAAGGACCCGAGATCGGAAGAGCGGTTCAGCAGGAATGCCGA	1	-	-	1	1	1	1	1	-	1	1	1	1	1	1	1	1	1	1	1	1	1	1	1	1	1	-	1	1	1	1	1	1	1	1	1	-	1	1	1	1	1	1	1	1	1	-	-
4326955	TGCAGCCTTTAGCTGGCCCACGCATCTTGACCCCTACGACCGAGATCGGAAGAGCGGTTCAGCAGGAAT	1	1	1	1	1	1	1	-	1	1	-	-	1	1	1	1	-	1	-	1	1	1	1	1	1	1	1	-	1	-	1	1	1	1	1	1	1	1	1	-	1	1	1	1	1	1	-	-
4274482	TGCAGCTGCTGGCCCGCTACCCGAGATTGGAAGAGCGGTTCAGCAGGAATGCCGAGACCGATCTCGTAT	1	-	1	1	1	1	-	1	1	-	1	1	1	-	1	1	1	1	1	1	1	1	1	1	1	1	1	1	1	1	1	1	1	1	1	1	1	1	1	1	-	1	1	1	1	1	1	1
4296062	TGCAGCTGGCTCAGCTCCGCGCACACCGCCATTGAGTCGCGAGGGCTTTCCGAGATCGGAAGAGCGGTT	1	1	1	1	1	1	1	1	1	1	1	1	1	1	1	1	1	1	1	0	1	1	1	1	-	1	-	1	1	-	-	-	1	1	1	1	1	1	1	-	1	1	1	1	1	1	1	1
4274878	TGCAGTGGAGAACCAGCAGTGCTCGGAGTTCTTTGGGCAACCGAGATCGGAAGAGCGGTTCAGCAGGAA	1	1	1	1	1	1	1	0	1	1	1	1	1	1	1	1	1	1	1	-	-	1	1	1	1	1	1	1	-	1	1	1	1	1	1	1	-	-	-	1	1	1	1	1	1	-	1	1
4273108	TGCAGCTCGTAGGAGGTGCTGGTGATGAGCGCGTCGGCGCCGAGATCGGAAGAGCGGTTCAGCAGGAAT	1	1	1	-	1	1	1	1	-	1	1	1	1	1	1	1	1	1	-	1	1	1	1	1	1	1	-	1	1	1	1	1	-	1	1	1	1	1	1	1	-	1	1	1	1	-	1	1
4294793	TGCAGAGTCGGCGGCTGGGCAGCGCGCCATTTCCTCCGAGATCGGAAGAGCGGTTCAGCAGGAATGCCG	-	-	1	-	1	-	-	1	1	1	1	1	1	1	-	1	-	1	1	1	1	1	1	1	1	-	-	1	1	1	-	1	1	1	1	1	1	1	1	1	1	1	-	-	1	1	1	-
4281386	TGCAGCCTCCATCCAAGAAGCGCCGAGATCAGAAGAGCGGTTCAGCAGGAATGCCGAGACCGATCTCGT	1	-	1	1	1	1	-	1	0	1	1	1	1	1	1	1	1	1	1	1	1	1	1	1	1	1	-	1	1	1	1	1	1	1	1	-	1	1	1	1	-	1	1	1	-	1	1	1
4264474	TGCAGATAGAGCGGCGTCGGCGCAGCGCCACCCAACCCAACCAGTGGACAGCAGCGACCCATCCACCGA	1	1	1	1	1	1	1	1	1	1	-	1	1	1	1	-	1	1	1	1	1	1	1	1	1	1	1	1	1	1	1	1	1	1	1	1	1	1	1	1	1	1	1	1	1	-	1	1
4269652	TGCAGGCCAACATCAAGAAGTCCGTCAACCTCGAGGCCCTCGCCGCCGAGATCGGAAGAGCGGTTCAGC	1	1	1	1	1	1	1	1	1	1	1	1	1	1	1	1	-	1	1	1	1	1	1	1	1	1	1	1	1	1	-	1	1	1	1	-	1	1	1	1	1	1	-	1	1	1	0	-
4290732	TGCAGAAGCGTTGAATCGATTCCTTGGTGCGCGGCGATTGCCGAGGGGAGCGAGATGGTACAGAAGCGC	1	1	1	1	1	1	1	1	1	1	1	1	1	1	1	1	1	1	1	-	1	1	1	1	1	1	1	1	1	1	1	1	1	1	1	1	1	1	1	1	1	1	1	1	1	1	-	-
4287491	TGCAGCAATGCTCGATCTTCCCCATCTGGGTGTCATTGTACCGAGATCGGAAGAGCGGTTCAGCAGGAA	1	-	1	1	1	1	1	1	1	1	1	1	1	1	1	1	1	1	1	-	1	-	-	1	1	1	1	1	1	1	0	1	1	1	1	1	1	1	1	1	1	1	1	1	1	-	1	1
4280448	TGCAGCTGCGGGCCGACGTGCTCAACCAGCTGGACGGCGCGCCGAGATCGGAAGAGCGGTTCAGCAGGA	1	-	-	1	1	0	1	1	-	1	1	1	1	-	1	1	1	1	1	1	1	1	1	1	1	1	-	1	1	1	1	-	1	1	1	1	1	1	1	1	1	1	1	1	1	1	1	1
4287077	TGCAGCCTCATCAGGTCGCCTCCTATGCGCCGCCGCATCAGCCGAGATCGGAAGAGCGGTTCAGCAGGA	1	1	1	1	1	1	1	1	1	1	1	-	-	1	1	1	1	-	1	1	1	1	1	1	1	1	1	-	-	1	1	1	1	1	1	1	1	1	1	1	1	1	1	1	1	1	1	1
4265545	TGCAGGAGGAGCGAGTCGTCGAGGTCGAGGCCCGCGCCGAGATCGGAAGAGCGGTTCAGCAGGAATGCC	1	1	1	1	1	1	1	1	1	1	1	1	1	1	1	1	1	1	1	1	0	1	1	-	1	1	1	1	1	1	1	1	-	1	1	1	1	1	1	1	1	1	1	1	1	1	1	1
4303042	TGCAGGAGCACTCCAGCTTCATGGCGCCGCCCCCCTCGGAGAGCTCCACCATGCAGATCCGAGATCGGA	1	1	-	1	1	1	1	1	1	1	1	1	1	1	1	1	1	1	-	1	1	1	1	-	-	1	1	1	-	1	-	-	1	1	1	0	1	1	1	1	1	-	1	1	1	1	1	-
4304653	TGCAGAGGCGGCGGCTGGGCAGCGCGCCATTTCCACCGAGATCGGAAGAGCGGTTCAGCAGGAATGCCG	-	-	1	-	1	1	-	1	1	1	1	1	1	1	-	1	-	1	1	1	1	1	1	1	1	-	-	1	1	1	-	1	1	1	1	1	1	1	1	1	1	1	-	-	1	1	1	-
4289113	TGCAGACCACCAAGGCCGTGCTCGGCACCGCCGGTTACATCGACCCGAGATCGGAAGAGCGGTTCAGCA	1	1	1	-	1	1	-	1	-	1	1	1	1	1	1	1	-	1	0	-	1	1	1	1	1	1	1	1	1	1	1	-	1	1	1	-	1	1	1	1	-	1	1	1	-	1	1	1
4328971	TGCAGCAGCAGTTCGTGTCCTTGGCCACCATCGTGCCCGAGATCGGAAGAGCGGTTCAGCAGGAATGCC	1	-	1	1	-	1	1	1	1	1	1	1	1	1	1	1	1	1	-	1	1	1	1	1	1	1	1	1	1	1	1	1	1	1	1	1	1	1	1	1	1	1	1	1	1	-	-	1
4291851	TGCAGTGAAAACAATACACAAGGAACATGATGCACACCGAGATCGGAAGAGCGGTTCAGCAGGAATGCC	1	-	1	1	1	1	1	1	1	1	1	1	1	1	1	1	1	1	-	1	1	1	1	1	1	1	1	1	1	1	-	1	1	1	1	1	1	1	1	1	1	1	1	1	1	-	1	1
4277708	TGCAGAGATCAGAGACGAGCCGTGGCTCCGATCCGCCGAGATCGGAAGAGCGGTTCAGCAGGAATGCCG	1	1	1	1	0	1	-	1	1	1	1	-	1	1	1	1	1	1	1	1	1	1	1	1	1	1	1	1	1	1	1	1	-	1	1	1	1	1	1	1	1	1	1	1	1	1	1	1
4328668	TGCAGCGGGTCGTCAACTCCCTGGCTGTCGAGATGTTCGCTGGACTCGCGTCCGAGGACGCCAGCAAGG	1	1	1	-	1	1	1	1	-	1	1	1	1	1	-	1	1	1	1	1	-	1	1	1	1	1	-	1	1	1	1	1	1	1	1	1	1	-	1	1	1	1	1	1	1	1	-	1
4286695	TGCAGGCCAGGATCGATCTTGCCGAGATCTGAAGAGCGGTTCAGCAGGAATGCCGAGACCGATCTCGTA	1	-	1	1	1	1	1	1	1	1	1	1	1	1	1	1	-	1	1	-	1	1	1	1	1	1	1	1	-	1	1	1	1	1	1	1	1	1	1	1	1	1	1	1	1	1	1	1
4277190	TGCAGCAGAGCCGCCTGCTGATCCCGAGCGGCGACGTGGCCCGAGATCGGAAGAGCGGTTCAGCAGGAA	1	1	1	1	1	1	1	1	1	1	1	1	1	-	1	1	1	1	1	1	1	1	1	1	1	1	1	1	1	1	1	1	1	1	1	1	1	1	1	1	1	1	1	1	1	1	1	1
4270781	TGCAGAAGGGTGCCCTGGCTGGAGGCCAGAGACGAGGAACCGCGACGGAGACGCCCGAGATCGGAAGAG	1	1	1	1	1	1	1	-	1	1	1	-	-	1	1	-	-	1	1	-	1	1	1	-	1	1	1	1	1	1	1	1	1	1	1	1	1	-	1	1	1	-	1	-	-	1	1	1
4275134	TGCAGCTCATGTCGGAGCTCACCCTCGGGCCGAAATCGGAAGAGCGGTTCAGCAGGAATGCCGAGACCG	1	1	1	1	1	1	1	1	-	1	-	1	1	1	-	1	1	1	1	1	1	1	1	1	1	1	-	1	1	1	1	1	1	1	1	1	1	1	1	1	1	1	1	-	1	1	1	1
4270747	TGCAGAGCCAGCGCCTTATATCCGAGATCTGAAGAGCGGTTCAGCAGGAATGCCGAGACCGATCTCGTA	-	1	1	-	1	1	1	1	1	1	1	1	1	-	-	1	1	1	1	1	-	1	1	1	1	1	1	1	1	1	1	1	1	1	1	1	1	1	1	1	1	1	1	0	1	1	1	1
4299930	TGCAGGTTAAGATGGAACAGCACATGCCGCAGCAGCCGCCGCACATGATGTACTCGAGCCCGTACTTCT	-	1	1	1	-	1	1	1	1	1	1	1	-	1	1	1	-	1	1	1	1	1	1	1	-	1	1	-	1	1	1	1	1	1	-	1	1	1	1	1	1	1	1	1	1	1	1	-
4279153	TGCAGATTCACATTGCTCGGAACCAAAATGCAGCAGGGCCTTACCGAGATCGGAAGAGCGGTTCAGCAG	-	-	1	1	-	1	1	1	1	1	1	1	1	1	1	1	1	1	1	-	1	-	1	1	1	1	1	1	1	1	-	-	1	1	1	1	1	1	1	1	1	1	1	1	1	0	-	-
4292571	TGCAGACACCTGCGTCGACAACAAAAATGTCAATCTTCTGTTCGAGAGGAATCTGGAACGCACTCTGAA	1	1	1	1	1	1	1	1	1	1	1	1	1	1	1	1	1	1	-	1	1	1	1	1	1	1	1	1	1	1	1	1	1	1	-	1	1	1	1	1	1	1	1	1	1	1	1	1
4327075	TGCAGTGGATCGCCAAGCGCATCAGCATGCTCCAGCAGATGGACCCGAGATCGGAAGAGCGGTTCAGCA	1	1	1	1	1	1	1	1	1	1	1	1	1	1	1	1	1	1	1	-	1	1	1	1	1	-	1	1	1	1	1	1	1	1	1	1	1	1	1	1	1	1	1	1	1	1	1	1
4272313	TGCAGCCCAACATGAGGGAGATTGAGTCCGCCCAGGACCTCGTCGACTCGCTGGCCAACGCCGAGATCG	1	1	1	1	1	1	1	1	1	1	-	-	1	1	1	1	1	1	1	1	1	1	1	1	1	1	1	1	1	1	1	1	1	1	1	1	1	1	-	-	1	1	1	1	1	0	1	1
4273910	TGCAGGAACAGCGTGGGCGCCTGGTGGTACTTCACCAGGGATTTGCCGAGATCGGAAGAGCGGTTCAGC	1	1	1	1	1	1	1	1	1	1	-	1	1	1	-	1	1	1	1	1	1	1	1	1	1	1	1	-	1	1	1	-	1	1	1	-	1	1	1	1	1	1	1	1	1	1	1	1
4263475	TGCAGCCGAGCCGCCGCCTGCTGCTCCTACTGCCTGCCGCTGTGCCCGCTGCAAATATTCCGAGATCGG	1	1	1	1	1	1	1	1	1	1	1	1	1	1	1	1	1	1	1	1	1	1	1	1	1	1	1	1	1	1	1	1	1	1	1	1	1	1	1	1	1	1	1	-	1	1	1	1
4295924	TGCAGTGGCACCTCGTCTATATCTACACATCTCGCCGTCTTTGTCCGCACATCCTCTGAGCTAGATATC	1	-	1	1	1	1	1	1	1	1	1	1	1	1	1	1	1	1	1	1	1	1	1	-	1	1	1	1	1	1	1	1	1	1	1	-	1	1	1	1	1	1	1	1	1	-	1	1
4306382	TGCAGGCAGAGGACGACGTAGATCTTCCGAGATCTGAAGAGCGGTTCAGCAGGAATGCCGAGACCGATC	1	1	1	-	1	1	-	1	1	1	1	1	1	1	1	1	-	1	1	1	1	1	1	1	1	-	1	1	1	1	1	-	1	1	1	1	1	1	1	1	1	1	1	1	1	1	1	1
4302156	TGCAGGCAGAGGACGACGTAGATCTTCCGATATCGGAAGAGCGGTTCAGCAGGAATGCCGAGACCGATC	1	1	1	-	1	1	-	1	1	1	1	1	1	1	1	1	-	1	1	1	1	1	1	1	1	-	1	1	1	1	1	-	1	1	1	1	1	1	1	1	1	1	1	1	1	1	1	1
4277361	TGCAGACCATCCGCAAGCTGTCGCCCAAGGCATTCGTGCTCGTGGAACAGGACGCCGAGATCGGAAGAG	1	-	1	1	1	1	1	1	1	1	1	-	1	1	1	1	1	1	-	1	1	1	1	1	1	1	1	1	1	1	1	1	1	1	1	-	1	1	1	1	1	1	1	1	1	1	-	1
4303081	TGCAGATCTGTGCCGCGGTGGTGGCCGGAGTCTAGTTCACGATTCGAGCCGAGATCGGAAGAGCGGTTC	1	1	1	1	1	1	1	1	1	1	1	1	1	1	1	1	1	1	1	1	1	1	1	1	1	1	1	1	1	1	1	1	-	1	1	1	1	1	1	1	1	1	1	1	-	-	1	-
4269135	TGCAGAAACCACCAAAACGCCCAGCCGAGAAACGCGGTCCGAGATCGGAAGAGCGGTTCAGCAGGAATG	1	-	1	1	1	1	1	1	1	1	1	1	1	1	1	1	1	1	1	1	1	1	1	1	1	1	1	1	1	1	1	1	1	1	1	-	1	1	1	1	1	1	1	1	1	1	1	1
4293948	TGCAGGACGCACTCTGGGACTCGGACACCGACGACGAGGAGGCGGACGAAACGCCGAGATCGGAAGAGG	1	1	1	1	1	1	1	1	1	1	1	1	1	1	1	1	-	1	1	1	1	1	1	1	1	1	1	1	1	1	-	1	1	-	1	1	1	1	1	1	1	1	1	-	1	1	-	-
4285115	TGCAGATCCACGCATCATGGGCCAGTAATTGTGCTGTTATGCATGTCCGAGATCGGAAGAGCGGTTCAG	1	-	1	1	1	1	1	-	1	1	1	-	1	1	1	1	-	1	-	-	1	1	1	-	1	1	1	1	1	1	1	1	1	1	1	-	1	1	1	1	1	1	1	1	1	1	0	1
4291192	TGCAGCTGGAGGCGGCGGGGCGGAAGCGCCAGGGGCCCAGATCGGAAGAGCGGTTCAGCAGGAATGCCG	-	-	-	1	1	1	1	1	1	1	-	1	1	1	-	1	1	1	1	1	1	1	1	1	1	1	1	-	1	1	-	1	1	1	1	1	1	1	1	1	1	1	1	1	1	1	1	1
4302906	TGCAGGGGCAGCCGGGGAACAAGACGTGCGTCGACTGCGCGCAGAGGAACCCGCAGTGGGCCAGCGTCT	1	-	-	-	1	-	-	1	-	1	-	1	1	1	1	1	1	1	1	1	-	1	1	1	1	1	1	-	1	1	1	-	1	1	1	1	1	1	1	1	1	1	1	1	1	1	1	1
4304768	TGCAGTACCTCTTTCGATTTACGTCTTGTCGCTTACTCTGCCATACATGCCCGAGATCGGAAGAGCGGT	1	-	1	1	1	1	1	1	1	1	1	1	1	1	1	1	-	1	1	1	1	1	1	1	1	1	1	1	1	1	1	1	1	1	1	1	1	1	1	1	1	1	1	1	-	0	-	-
4269437	TGCAGCTGCTGGGGCGCGGTGTACAGCAACGGGACGGGCTACTGCTACTTCATGGACTACCCGAGATCG	1	1	1	-	1	1	1	1	1	1	1	1	1	1	1	1	1	1	1	0	1	1	1	1	1	1	1	1	1	1	1	1	1	-	1	1	1	1	1	1	1	1	1	1	1	1	1	1
4328279	TGCAGGTTGTTGTATCTGCTGAAGGTCTTGCAGCACACCGAGATCGGAAGAGCGGTTCAGCAGGAATGC	-	-	1	1	-	1	-	1	1	1	1	-	1	1	1	1	1	1	-	1	1	1	1	-	1	1	1	1	1	1	1	1	1	1	1	1	1	1	-	1	1	1	1	1	-	1	-	-
4285522	TGCAGTAACCGCATTAATGGGAAAAATAATTGCAGTCGACTGCGCCGAGATCGGAAGAGCGGTTCAGCA	1	1	1	-	1	1	1	1	1	1	1	1	1	1	1	1	1	-	-	-	1	1	1	1	1	1	1	1	1	1	1	1	1	1	1	1	1	1	1	1	1	1	1	1	1	1	1	1
4275416	TGCAGAGTTCTGCTAGCGCCATGGCGGCCTCTGTGCGGGTGCTGGCCCTGTCGCTGCCCAGCGCGGCCA	1	1	1	1	1	1	1	1	1	1	1	1	1	-	1	1	1	1	-	1	1	1	1	1	1	1	1	1	1	1	-	1	1	1	1	1	1	1	1	1	1	1	1	1	1	1	1	1
4302460	TGCAGCAGGCGGTGGTGGCGAACAATCCGCTCGCCCCGAGATCGGAAGAGCGGTTCAGCAGGAATGCCG	-	-	1	1	-	-	1	1	1	1	1	1	-	1	1	1	1	1	1	1	1	-	1	1	1	1	1	1	1	1	-	1	1	-	1	1	1	-	1	1	1	1	1	1	1	1	1	1
4292087	TGCAGACCCTTACGCTGGCCCGCAATTCGCCCAAGCGCGTCCTTCTCCGCAGCCAAAGCCTCCGAGATC	1	1	1	1	1	1	1	1	-	1	-	1	1	1	1	1	1	1	1	-	1	1	1	1	1	1	1	-	1	1	1	1	1	1	1	1	1	1	1	1	1	1	1	1	1	1	1	1
4286428	TGCAGGACTGGCCCTGGGCATCTACGGGCTGGAAGCAGCCCTGCCGAGATCGGAAGAGCGGTTCAGCAG	-	-	1	1	1	1	1	-	1	1	1	-	1	1	1	1	-	1	1	1	1	1	1	1	1	1	1	1	1	1	1	1	1	1	1	1	1	-	1	1	1	-	1	1	1	0	1	-
4290919	TGCAGCATCTTCAGGTACGTGTCCCTCTGCTTGAACCGAGATCGGAAGAGCGGTTCAGCAGGAATGCCG	1	-	1	1	1	1	1	1	1	1	1	1	-	1	1	1	1	1	1	1	1	1	1	1	1	1	1	-	1	1	-	1	1	1	1	1	1	1	-	1	1	1	1	1	-	-	1	1
4268856	TGCAGTGGCCCATCATCATCATCGGCCTCGCAGTCATGGTCGTCTCCCTCATGGGCTTCGCCGAGATCG	1	1	1	1	1	1	1	1	1	1	-	-	1	1	1	1	1	1	-	1	1	1	1	-	1	1	-	1	1	1	1	1	1	1	1	-	1	1	1	1	1	1	1	1	1	-	1	1
4326177	TGCAGGAATCTGGTGCCGCTGCAAGAAGTTCAAATGTCACTGTAGCGGCCGAGATCGGAAGAGCGGTTC	1	1	1	1	1	1	1	1	1	1	1	1	1	1	1	1	-	1	-	1	1	1	1	-	1	1	1	1	1	1	1	1	1	1	1	1	1	1	1	1	1	1	1	1	1	1	-	1
4269784	TGCAGAACAAGAACACCCAGATGATCAACCTGCGGATCAACGCGCCGAGATCGGAAGAGCGGTTCAGCA	1	-	1	1	1	1	1	1	1	1	1	1	1	1	1	1	1	1	-	1	1	1	1	1	1	1	1	1	1	1	1	1	1	1	1	1	1	1	1	1	1	-	1	1	1	1	-	1
4268884	TGCAGTACTACCATCCCCTCTTCGGCTCCTTCCACAACTTCCTCCGAGATCGGAAGAGCGGTTCAGCAG	1	-	1	1	1	1	1	1	1	1	1	1	1	1	1	1	1	1	1	1	1	1	1	1	1	1	1	1	1	1	-	1	1	1	1	1	0	1	1	1	1	1	1	1	1	1	1	1
4270546	TGCAGCAGCGGGCCGAGGACCAAGGGCGGGCACACGGTGACCACGTCCATGCCGAGATCGGAAGAGCGG	1	-	1	1	1	1	1	1	1	1	1	1	1	1	1	1	1	1	1	1	1	1	1	1	1	1	1	1	1	1	1	1	1	1	1	1	1	1	1	1	-	1	-	1	1	-	-	1
4290850	TGCAGCTCATGCCGAACCTGCACAATCCAGTCCTGAGGTAGTAGGTGCAGTCCGAGATCGGAAGAGCGG	1	1	1	1	-	1	1	1	1	1	1	-	1	1	1	1	1	1	-	-	1	1	1	1	1	1	1	1	-	1	1	1	1	1	1	0	1	-	1	1	1	1	1	1	1	-	1	1
4275319	TGCAGCACCAGCACCAGCTGGACGAGACGCAGCAGAGCTGGCTGCTCGGCCCGCCCAGATCGGAAGAGC	1	1	1	1	1	1	1	1	-	1	1	1	1	1	1	1	1	1	-	1	-	1	1	1	1	1	-	1	1	1	1	1	1	1	1	1	1	1	1	1	-	1	1	1	1	1	-	-
4265649	TGCAGTGGGATCGGAGCAGGAGAAGAAGGCCGCCGCCACGGTGGAAGTGGAAGGCATCCCGTTCCCGCG	1	-	1	1	1	1	1	1	1	1	1	-	1	1	1	1	1	1	-	1	1	1	1	1	1	1	1	1	1	1	1	1	1	1	1	-	-	1	1	1	1	1	1	1	1	0	-	1
4268818	TGCAGTCAGTGCAGGACTGCGGGAGGCAGCCTTGCCCTGGCCGGCCTGGCGTCCGAGATCGGAAGAGCG	1	1	1	1	1	1	1	-	-	-	1	-	1	1	1	1	1	1	1	1	1	1	1	1	1	1	1	1	1	-	1	1	1	1	1	1	1	1	1	1	1	1	-	1	1	1	1	-
4288257	TGCAGCGTGGTGTCGCCGTTGCGGAGGAAAAAGAGCACGCGGTTGAGGAAGACGGCGCCGATGAGCCGA	1	-	1	1	1	1	1	0	1	1	1	1	1	-	1	1	1	1	1	-	1	1	1	1	1	1	1	1	1	1	1	1	1	1	1	1	1	1	1	1	1	1	1	1	1	1	1	1
4297888	TGCAGTAACGCAGTAAAACCAGCGCGCGCAGCAGTGGCGCCGAGATCGGAAGAGCGGTTCAGCAGGAAT	1	1	1	1	-	1	1	1	1	1	-	1	-	1	1	1	-	1	1	1	1	1	1	1	1	-	1	1	1	-	-	1	-	1	1	0	1	1	1	1	1	1	1	1	1	1	1	-
4326623	TGCAGAGGTCTCCTGGACGCGAAGCTCACGCCACACGGCATCGCCGACCCTTAGAATCCGAGATCGGAA	-	-	1	1	1	1	1	1	1	1	1	1	1	1	1	1	1	1	1	1	1	1	1	1	1	1	1	1	1	1	1	1	1	1	-	1	1	-	1	1	1	1	1	1	1	1	1	1
4266083	TGCAGCAGCAAAAGTCCCTGAACTGCATCTGGATTTTTGAGCGGCGACCGAGATCGGAAGAGCGGTTCA	1	-	1	1	1	1	1	1	1	1	1	1	1	1	1	1	1	1	1	1	1	1	1	1	1	1	1	1	1	1	1	0	1	1	1	1	1	-	1	1	1	1	1	1	1	-	1	1
4297739	TGCAGTTCCAGAGGCCAAGAAAGGCACAAAAGTTACCAACCAAGCTCCCTCCAACAAAACCCTAACCAC	1	1	1	1	1	1	1	1	1	1	1	1	1	1	1	1	1	1	1	-	1	1	1	1	1	1	1	1	1	-	1	1	1	1	1	1	1	1	1	1	1	1	1	1	1	1	1	1
4270221	TGCAGGGCAAGGACGAGGAGGAGAAGGAGGAGGAGGACCTCGCCGAGATCGGAAGAGCGGTTCAGCAGG	1	1	1	1	1	-	1	1	1	1	1	1	1	1	1	1	1	1	1	1	1	1	1	1	1	1	1	1	1	1	1	1	1	1	1	-	1	1	1	1	1	1	1	1	1	1	1	-
4269665	TGCAGCGCCATCTGGAGGAGCTCGTCCTCGTCGACATCGCTGTCGCTCATGGCCGAGATCGGAAGAGCG	1	-	1	1	1	1	1	1	1	1	1	1	1	1	1	1	1	1	1	-	1	-	1	1	1	1	1	1	1	1	0	1	-	1	1	-	1	1	1	1	1	1	1	1	-	1	-	1
4290678	TGCAGCGTTTGTGTTCGGCGATTCGATCGTCGATCCCGAGATCGGAAGAGCGGTTCAGCAGGAATGCCG	-	-	1	1	1	-	1	1	1	1	1	1	1	1	1	1	1	1	-	1	-	1	1	1	1	1	1	1	1	1	1	1	1	1	1	-	1	1	1	1	1	1	1	1	1	1	-	-
4268705	TGCAGCGTGATGGAGTAGGACGTCTTCTGGTTGCGCTCCGTGTGCCGAGATCGGAAGAGCGGTTCAGCA	-	-	1	1	1	1	1	1	1	1	1	1	1	1	-	1	1	1	1	1	1	1	1	1	1	1	1	1	1	1	1	1	1	-	-	-	1	1	1	1	1	1	1	-	1	0	-	1
4263689	TGCAGGAACTTGGTGATGGGCTGGATCACCGCGTTGGCGAAGAGCCCCGAGATCGGAAGAGCGGTTCAG	1	-	1	1	1	1	-	1	1	1	1	-	1	1	1	1	-	1	1	-	1	-	1	-	-	1	1	1	1	1	1	1	1	1	1	1	1	1	1	1	1	1	1	1	1	1	0	1
4279380	TGCAGAACCTGACGCTGGCGTGATGCGAGGCGTGGGTTCAACTCCGAGATCGGAAGAGCGGTTCAGCAG	1	1	1	1	1	1	1	1	1	1	1	1	1	1	1	1	1	1	1	1	1	1	1	1	-	1	1	1	1	1	1	-	1	1	1	-	1	1	1	1	1	1	-	1	1	1	1	1
4282568	TGCAGGTGGGGGTGAAGGCGCCAGGGACGCCGAAGAGGATGACCTTCTTGCCGAGATCGGAAGAGCGGT	-	-	1	1	1	1	1	1	1	1	1	-	1	1	1	1	-	1	1	1	1	1	1	1	1	1	1	1	1	1	1	1	1	-	1	-	1	1	1	1	1	1	1	1	1	-	1	1
4271397	TGCAGGCCCTCGAGTCAGCCGATTACTGGATCAGTACATTCGGCCGAGATCGGAAGAGCGGTTCAGCAG	1	1	1	1	1	1	1	1	1	1	1	1	1	1	1	1	1	1	1	1	1	1	1	-	1	1	1	1	1	1	-	1	1	1	1	1	1	1	1	1	1	1	1	1	1	1	1	1
4282147	TGCAGGCTGCTGGAGAAAGAGCAGGCAGCTGTCGACCGAGATCGGAAGAGCGGTTCAGCAGGAATGCCG	1	1	1	-	1	1	-	-	-	1	0	1	1	1	1	1	1	1	1	1	1	1	1	1	1	1	1	1	1	1	1	1	1	1	1	1	1	1	1	1	-	1	1	-	1	1	1	1
4278821	TGCAGTTGACGATGAGTATGTCGATGGCCTCGGGGGCGATGCCGAGATCGGAAGAGCGGTTCAGCAGGA	1	-	1	1	1	-	1	1	1	1	1	1	1	1	1	1	1	-	0	1	1	1	1	1	1	1	-	1	-	1	1	1	1	1	1	1	1	1	1	1	1	1	1	1	1	1	1	-
4274058	TGCAGCGCGTGCACGCCGAGATCAGAAGAGCGGTTCAGCAGGAATGCCGAGACCGATCTCGTATGCCGT	1	1	-	1	1	-	1	-	-	1	1	1	1	1	1	1	1	1	1	1	1	1	1	1	1	1	1	1	-	1	1	1	1	1	1	1	1	1	-	1	1	1	1	1	1	1	1	-
4283253	TGCAGCCCGCCCCACGGCACCACCTGCACCATCGTCGCCCCCGAGATCGGAAGAGCGGTTCAGCAGGAA	1	1	1	1	1	1	1	1	1	1	1	1	1	1	1	1	1	1	0	-	1	-	1	1	1	1	1	1	1	1	-	1	1	1	1	-	1	1	1	1	1	1	-	1	1	1	1	1
4281261	TGCAGCAGAATGGACCTGCCTGGCAAGGCTGGCCAGGACTCCGAGATCGGAAGAGCGGTTCAGCAGGAA	1	-	1	1	1	1	1	-	1	1	1	-	1	1	1	1	-	1	1	1	1	1	1	1	1	-	1	1	1	1	1	1	1	1	1	1	1	1	1	1	1	1	1	1	1	1	1	1
4291540	TGCAGCAAGAACTTGCGCCTCCTCTCGAGCCTTTTGCGATCTTCTTCACTTCCCTCGGGCTCGGACCCG	-	1	1	1	1	1	1	1	1	1	1	1	1	1	1	1	1	1	1	1	1	-	1	1	-	1	1	-	1	1	1	1	1	1	-	1	-	1	1	1	1	1	1	1	1	1	1	1
4300460	TGCAGGAAGTTCCAGGCTCCGCACCATGGCGACTTCGCCGAGATCGGAAGAGCGGTTCAGCAGGAATGC	1	-	1	1	1	1	1	-	1	1	1	1	1	1	1	1	1	1	1	-	1	1	1	-	-	1	1	1	1	1	1	-	1	1	1	1	1	1	1	1	1	-	1	1	1	1	-	1
4272730	TGCAGTTGCTGAGGCAGACCTTGAAGTCCGGCACGGAGGTGTTGAACCCGAGATCGGAAGAGCGGTTCA	1	1	1	1	1	1	1	1	-	1	1	-	1	1	1	1	1	1	1	-	1	1	1	1	1	1	1	1	1	1	-	1	1	1	1	1	1	-	1	1	1	1	1	1	1	0	1	1
4277188	TGCAGCTGCACACGCATCCACGTGTTAAACATTGGCAGTGTACAGTGGCGCCGAGATCGGAAGAGCGGT	-	1	1	1	1	1	1	1	1	1	1	1	1	1	1	1	1	1	-	-	1	1	1	-	1	1	1	1	1	-	1	1	1	1	1	-	1	1	1	1	-	1	1	1	1	-	-	1
4328314	TGCAGGAGATCGCGCAGAACAGGGCCACCACGCCGAGATCAGAAGAGCGGTTCAGCAGGAATGCCGAGA	1	1	1	1	1	1	1	1	1	1	1	1	1	1	1	1	1	1	1	1	1	1	1	1	1	1	1	1	1	1	1	-	1	1	1	1	1	-	1	-	1	1	1	1	-	-	1	1
4301612	TGCAGGCCATGGCGAAGCTGGTCGCCCTCTCCCCCTGCCTCGCGGAAGCCGCCATCTCCGAGATCGGAA	1	1	1	1	1	-	1	1	1	1	1	1	1	1	1	1	1	1	1	1	1	1	1	1	1	1	-	1	1	1	-	1	1	1	1	1	1	1	1	1	1	1	1	1	1	1	1	1
4269430	TGCAGCATCTCGTGTGTTTGGAGCTCTTCGTTTGGCCGAGATCGGAAGAGCGGTTCAGCAGGAATGCCG	1	1	1	1	1	1	1	1	1	1	1	1	1	1	1	1	1	1	1	1	1	1	1	1	-	1	1	1	1	1	1	1	1	1	-	1	1	1	1	-	1	1	1	1	1	1	1	1
4284378	TGCAGCTCTACAACAACAGCCTGAGCGGAGAGGTCCCTGCCGGGATCACTCAGTCGAGGAAGCTGAGAG	1	1	1	1	1	0	1	1	-	1	1	1	-	1	1	1	1	1	1	1	1	1	1	1	1	1	1	1	1	1	1	1	-	1	-	1	1	1	1	1	1	1	-	1	1	1	1	-
4287013	TGCAGGTGGGCAACGACCTCAACCACCGCTTCCTAGCGCGGCTGTCGGCGCGGTACGGCCCCGTGTTCC	1	-	1	1	1	1	1	1	1	1	1	1	1	1	1	1	-	1	1	1	1	1	1	1	1	1	1	1	1	-	1	-	1	1	-	1	1	1	1	1	1	-	1	1	1	1	1	1
4274805	TGCAGCCTCTTCAACCCCACGCCCTCGCTCTCCGCCATGGTCGTCAACAAGTACGAGCTCCGAGATCGG	1	1	1	1	1	1	1	1	1	1	1	-	1	1	1	1	1	1	-	1	1	1	1	1	1	1	1	-	1	1	1	1	1	1	1	1	1	1	1	1	1	1	1	1	1	0	1	1
4299941	TGCAGTTAGGCGCGCACACACACAACACACATCATGGTGGGTACCGTTGCCAAGGACGTGACGACCGAG	1	1	1	1	-	1	1	1	1	1	1	-	1	1	1	1	1	1	1	1	1	1	1	-	1	1	1	1	1	1	1	1	1	1	-	-	1	1	1	1	1	1	1	1	-	1	1	1
4278155	TGCAGCAGTACGCCTCCGTCCCGAACGCCTCGCACGCGCTCCGAGATCGGAAGAGCGGTTCAGCAGGAA	1	1	1	-	1	1	1	1	1	1	1	1	1	1	-	1	1	1	-	-	1	1	1	1	1	1	1	1	1	1	-	1	1	1	1	1	1	1	1	1	1	1	1	1	1	1	1	1
4277887	TGCAGGCTGCACGCCCACCGAAAAAGGGTACTGTAGTGAGGACCGAGATCGGAAGAGCGGTTCAGCAGG	1	-	1	1	1	1	1	1	1	1	1	-	-	1	1	1	1	1	1	1	1	1	1	1	1	1	1	-	1	1	1	1	1	1	1	1	1	1	1	1	1	1	-	1	1	1	1	-
4296114	TGCAGGAGCAAAGAAGGAACGCATCAAGAATGCACAGGGTGCCCGAGATCGGAAGAGCGGTTCAGCAGG	1	-	1	1	1	1	1	1	1	1	1	1	1	1	1	1	1	1	-	1	1	1	1	1	1	1	1	1	1	1	1	1	1	1	1	-	1	1	1	1	1	1	1	1	-	1	0	1
4269105	TGCAGAGCGCGGTGGAACCACGCAGTTCTCGGGTAACTCGTCCTGGCCAAGGATCCGAGATCGGAAGAG	1	1	1	1	1	1	-	1	1	1	1	1	1	1	1	1	1	1	1	1	1	1	1	1	1	1	1	1	1	1	1	1	1	1	1	0	1	1	1	1	1	1	1	1	1	1	1	1
4277834	TGCAGTACTGCACGATGGCAATATGAATATCGCGCGGATGAGCTCTACTGAACCGAGATCGGAAGAGCG	1	-	1	1	1	1	1	1	1	1	1	-	-	1	1	1	-	1	1	1	1	1	1	1	1	1	1	1	1	1	1	1	1	-	-	1	1	1	1	1	1	1	1	1	1	1	-	1
4292047	TGCAGGGACCACCTGCGGGATGAAGTCCAGCGGCAAGCGAGCCGAGATCGGAAGAGCGGTTCAGCAGGA	1	1	1	1	1	1	1	-	0	1	1	1	1	1	1	1	1	1	-	-	1	1	1	1	1	1	1	1	1	1	1	1	1	1	1	1	1	1	1	1	1	1	1	-	1	1	1	1
4272320	TGCAGTGTGTGCATATGATTATCATCTCGACATGCATTTCAGTGAAAGTTGGATCGATCGACCGAGATC	1	-	1	1	1	1	1	-	1	1	1	-	-	1	1	1	1	1	1	1	1	1	1	1	1	-	1	1	1	1	-	1	1	1	1	-	1	1	-	1	1	1	1	1	-	1	1	1
4284771	TGCAGGCACTAAGATAGAAATGGAAAATTACTAGCTTCGGTAGCTGCTACCGAGATCGGAAGAGCGGTT	1	-	1	1	1	1	1	1	1	1	1	-	1	1	1	1	1	1	1	1	1	1	1	1	1	1	1	1	1	1	1	1	1	1	1	0	1	-	1	1	1	1	1	1	1	1	1	1
4298769	TGCAGCCTCTACCTCGTCTTCGAGTACATGGAGCACGACCTCGCCGAGATCGGAAGAGCGGTTCAGCAG	1	1	1	1	1	-	1	1	1	1	1	1	1	1	1	1	1	1	0	1	1	1	1	1	1	1	1	1	1	1	1	1	-	1	1	-	1	1	1	1	1	1	1	1	1	-	-	1
4302862	TGCAGAGCATATACTGTCATTTCGTACCTGATGCCGGGGGCACGGCGCCGCCCGAGATCGGAAGAGCGG	1	-	1	1	1	1	1	1	1	1	1	1	1	1	1	1	1	1	-	1	1	1	1	1	1	1	1	-	1	1	1	1	1	1	1	1	1	1	1	1	1	1	1	1	1	1	0	1
4278482	TGCAGCCTCCTCCACCCGCCGTACTCCGGCGGAATCTCCCCGAGATCGGAAGAGCGGTTCAGCAGGAAT	1	1	1	-	1	1	1	1	-	1	1	1	1	-	1	-	1	1	1	-	1	1	1	1	1	1	1	1	1	1	-	1	1	1	1	1	1	1	1	0	-	1	1	1	1	1	1	1
4294479	TGCAGAATTCGTTCAGCACAGCAGAACACATCGGGAGCCGAGATCGGAAGAGCGGTTCAGCAGGAATGC	1	1	1	-	1	1	1	1	1	1	1	1	1	1	1	1	1	1	-	1	1	1	-	1	1	1	1	-	-	1	1	1	1	1	1	0	-	1	1	1	1	1	1	1	1	-	1	1
4285036	TGCAGATCATGGCCCTGCACTCCTCCAGCCCCATCTTCTCGGACCCCAGCAGCTTGCCCAGCATCCGCC	1	-	1	1	1	1	1	1	1	1	1	1	1	1	1	1	1	1	1	1	1	1	1	1	1	1	1	-	1	1	-	1	-	1	1	1	1	1	1	1	1	1	1	1	1	1	1	1
4270416	TGCAGGCGTCCTTCCTGGAGGTGTCCGTCCGCGGCCGAGATCGGAAGAGCGGTTCAGCAGGAATGCCGA	1	1	1	1	1	1	1	1	-	1	1	1	1	-	1	1	-	1	-	1	1	1	1	-	1	1	1	1	1	1	1	1	1	1	1	-	1	1	1	-	-	1	1	1	1	1	-	1
4266386	TGCAGGCGTCCTTCCTGGAGGTGTTCGTCCGCGGCCCAGATCGGAAGAGCGGTTCAGCAGGAATGCCGA	1	1	1	1	1	1	1	1	-	1	1	1	1	-	1	1	-	1	-	1	1	1	1	-	1	1	1	1	1	1	1	1	1	1	1	-	1	1	1	-	-	1	1	1	1	1	-	1
4278479	TGCAGGCTGACCCTGGAGTCGCCCCTGGTGTGCAGCAGCTCCCTGTCCGAGATCGGAAGAGCGGTTCAG	1	1	1	1	1	1	1	1	0	1	1	1	1	1	1	1	1	1	1	-	1	1	1	1	1	1	1	1	1	1	1	1	1	1	1	1	1	1	1	1	1	1	1	1	1	1	1	1
4283061	TGCAGGGGTTCGCCCAGAGCTACGCCAACCAGAGGATCAACGACTGCAAGCTCCAGCACTCCGAGATCG	-	1	1	1	1	1	1	1	1	1	1	1	1	1	1	1	1	1	1	1	1	1	1	1	1	1	1	1	1	1	1	1	1	1	1	-	1	-	1	1	1	-	1	1	1	1	1	1
4280362	TGCAGAGGGATACGAATCTTTTCTTGGCCGAGATTGGAAGAGCGGTTCAGCAGGAATGCCGAGACCGAT	1	-	1	1	1	1	1	1	1	1	1	1	1	1	1	1	1	1	1	1	1	1	1	1	1	1	1	1	1	1	1	1	1	1	1	1	1	1	1	1	1	1	1	1	1	1	0	1
4301935	TGCAGGCCCAGCACCGCCAACTGCTCCGCCACAGCCAAGAACGTCTGCCCGCCCTACCTCGTCGTCTAC	1	1	1	1	1	1	1	1	-	1	1	1	1	1	1	1	1	1	1	1	1	1	1	-	1	1	1	-	1	1	1	-	1	1	1	-	1	1	1	1	1	-	1	1	1	-	1	1
4264621	TGCAGCTGGAATCCCGACTGGAATCCAACATGGAAGCACCTCCGCCGAGATCGGAAGAGCGGTTCAGCA	1	-	1	1	1	1	1	1	1	1	-	1	1	1	1	1	1	1	0	-	1	1	1	1	-	1	1	1	1	1	1	1	1	1	1	-	1	1	1	-	1	1	-	1	1	1	1	1
4327909	TGCAGCAGCCAGCAGCAAACAGTCAGTTCAGAACTAGTCGATCAAGAATTGAAGGGCAATCGGTCGAAC	-	-	1	1	1	1	1	1	1	1	1	1	1	1	1	1	1	1	0	1	1	-	1	-	-	1	1	1	1	1	-	1	1	1	1	1	1	1	1	1	1	1	1	1	1	1	1	1
4293605	TGCAGCTGGGACTACATCCAGGAGGGCACCCAGGTGGCCAAGGACATGGACCGAGATCGGAAGAGCGGT	-	-	1	1	-	1	1	-	1	1	1	1	1	1	1	1	1	1	-	1	1	1	1	1	1	1	1	1	1	1	1	1	1	1	1	1	1	1	1	1	1	1	1	1	1	-	1	-
4326937	TGCAGGGACACGATGACGGCGGCGCCGCCCATGAAGCCGAGATCGGAAGAGCGGTTCAGCAGGAATGCC	-	1	1	1	1	1	1	-	-	1	-	1	0	1	1	1	1	1	1	-	1	1	1	1	1	1	1	-	1	1	1	1	1	1	1	1	1	1	1	1	1	1	-	1	1	1	1	1
4302984	TGCAGCCGCTCCACGCCGGGAAGCCTCCACACGATCTCCGAGATCGGAAGAGCGGTTCAGCAGGAATGC	1	-	1	1	-	-	1	1	-	1	1	1	1	1	-	1	1	1	1	1	1	1	1	1	1	1	-	1	1	1	1	1	1	1	1	1	1	1	1	1	1	-	-	1	1	-	1	-
4265922	TGCAGTACACCTATGCTAGTTACTAATTATGGTCAAACCGAGATCGGAAGAGCGGTTCAGCAGGAATGC	1	1	1	1	1	1	1	1	1	1	-	1	1	1	1	1	1	1	-	1	1	1	1	1	1	1	1	1	1	1	-	1	1	1	1	1	1	1	1	1	1	1	1	1	1	1	-	1
4297629	TGCAGGCTCTGCCACTTGAGCACCCACAGCGGGATGTGCTGCATCAGAGGGTGCACGCTGATGATCACG	1	1	1	1	1	1	1	1	1	1	1	-	1	1	1	1	1	1	1	1	1	1	1	1	1	1	1	1	1	1	1	-	1	1	1	-	1	1	1	1	1	1	1	1	1	0	1	1
4282686	TGCAGCGCCGCCTCGACGTCGTGGAGGAGCCCCGCGTCTCCGAGATCGGAAGAGCGGTTCAGCAGGAAT	1	-	1	-	1	1	1	1	1	-	1	1	1	1	-	1	1	1	1	1	-	1	1	1	1	1	1	1	-	1	1	1	-	1	1	1	1	1	1	1	1	1	-	-	1	1	1	1
4263618	TGCAGTTGAAGAACACCGACATGTCGCCCTGCACGTGCAGCGCCACCGCCTGGTGCCCGTCCGAGATCG	-	1	1	1	1	1	1	1	1	1	1	-	-	1	1	1	1	1	-	1	1	1	1	1	1	1	1	1	1	1	-	1	-	1	1	-	1	1	1	1	1	1	1	1	1	-	1	1
4296240	TGCAGAGCGCGTGGAACACGTGGACGAGCAGCGTGAAAGTGTCCGAGATCGGAAGAGCGGTTCAGCAGG	1	-	1	1	1	1	1	1	1	1	-	1	1	1	1	1	1	1	1	1	1	1	1	1	1	1	1	1	1	-	-	1	1	1	1	1	1	-	1	1	1	1	1	1	1	1	1	1
4290297	TGCAGGCCACAGCCCTGGAGAGAAGGTCGTTCCGAGATCGGAAGAGTGGTTCAGCAGGAATGCCGAGAC	1	1	1	1	1	1	1	1	1	1	1	1	1	1	1	1	1	1	1	1	1	1	1	1	1	-	1	0	1	1	1	1	1	1	-	1	1	1	1	1	1	1	1	1	1	1	1	1
4275616	TGCAGCGAGCAGCTGCTCGTGGAAGTGCTCGGCGTCGGCGTCAGGTCCGAGATCGGAAGAGCGGTTCAG	1	1	1	1	1	1	1	1	1	1	1	1	1	1	1	1	1	1	1	1	1	1	1	1	1	-	1	1	1	1	1	1	1	1	1	1	1	1	1	1	1	1	1	1	1	1	1	1
4273246	TGCAGAGACGGTGAGCACCAGGACCAGGTGTACGTGCAACCAGTCTTGCGTGAATTAGGGTGGCACGCA	1	1	1	1	-	1	1	1	1	1	1	-	1	1	1	-	1	1	1	-	1	1	1	1	1	1	1	1	1	1	1	1	1	1	-	1	-	1	1	1	1	1	1	1	1	-	1	1
4324482	TGCAGTCTGTCGTCAGTTCATCTGCATGCGCCGCAAGGATCAGCACAGCGCCACCGCTCGATCCGCGGA	1	-	1	1	1	1	1	1	1	1	1	1	1	1	1	1	-	1	0	1	1	1	1	-	1	1	1	1	1	1	1	1	1	1	1	-	1	1	1	1	1	1	1	1	-	1	1	1
4278112	TGCAGGTTCGCTCGCTGGCGCTGCGTGCAGCAGACCGAGATCGGAAGAGCGGTTCAGCAGGAATGCCGA	-	-	1	1	1	1	1	1	1	1	1	-	1	1	1	1	1	1	1	1	1	1	1	1	1	1	1	1	1	1	1	1	1	1	1	1	1	1	1	1	1	1	1	1	1	1	1	1
4291446	TGCAGCAGCGGGACATGGCGGATTGTTGGTTGCAGCTCTACGACCGAGATCGGAAGAGCGGTTCAGCAG	-	1	1	1	1	1	1	-	1	1	1	-	1	1	1	1	1	1	1	1	1	-	1	1	1	1	1	1	1	1	-	1	1	1	1	1	1	1	1	1	1	1	1	-	1	1	1	1
4293126	TGCAGGTGATGGGGGAGTCCAAGAGGAAGGAGGAGTACATCTGCTTCCCGAGATCGGAAGAGCGGTTCA	-	1	1	1	-	1	1	1	1	1	1	1	1	1	1	1	1	1	-	-	1	1	1	1	1	1	-	1	1	1	1	1	1	1	1	1	1	1	1	1	1	1	1	1	1	0	1	1
4272146	TGCAGGTTGTTGCGGAGGTTCTGGCAGATGAGGATCATCTCCGGGAGAACGCGGCCGAGATCGGAAGAG	1	-	1	1	-	1	1	1	1	1	-	1	1	1	1	1	1	1	1	1	1	1	1	1	1	1	1	1	1	1	1	0	1	1	1	1	1	1	1	-	1	-	1	1	1	-	1	1
4276910	TGCAGCAGCCCCTCCTCCTCCGCTTCTTGCCGCGAGGCCAAGCGGCCCCGCCCGAGATCGGAAGAGCGG	1	1	-	-	1	1	1	0	-	1	1	1	1	1	-	1	1	1	1	1	-	1	1	1	1	1	1	1	1	1	1	1	1	1	1	1	1	1	1	1	1	1	1	1	1	1	1	1
4271173	TGCAGCAGCCCCTCCTCCTCCGCTTCTTGCCGCGAGGCCAAGCGGCTCCGCCCCAGATCGGAAGAGCGG	1	1	-	-	1	1	1	0	-	1	1	1	1	1	-	1	1	1	1	1	-	1	1	1	1	1	1	1	1	1	1	1	1	1	1	1	1	1	1	1	1	1	1	1	1	1	1	1
4296784	TGCAGCAGCCCCTCCTCCTCCGCTTCTTGCCGCGAGGCCAAGCGGCTCCGCCCGAGATCGGAAGAGCGT	1	1	-	-	1	1	1	0	-	1	1	1	1	1	-	1	1	1	1	1	-	1	1	1	1	1	1	1	1	1	1	1	1	1	1	1	1	1	1	1	1	1	1	1	1	1	1	1
4267079	TGCAGGCTCTGCTGGCGCACCTTTGGCGGGCAGTGTGCCGAGATCGGAAGAGCGGTTCAGCAGGAATGC	1	-	1	1	1	1	1	1	1	-	1	1	1	1	1	1	1	1	1	1	1	1	1	0	1	-	1	-	1	1	1	1	1	1	1	1	1	1	1	1	1	1	1	1	1	1	1	1
4296428	TGCAGGGAAGCGTCAACCAGGACGAGCAGCGGCAGTACTCCGAGATCGGAAGAGCGGTTCAGCAGGAAT	1	-	1	1	-	1	1	1	1	1	1	-	-	1	1	1	1	1	1	1	1	1	1	-	1	1	1	-	1	1	1	-	1	1	1	1	1	1	1	1	1	1	1	1	1	-	1	1
4292475	TGCAGCTGTTTGCACTTGAGCGTGTGCTTGGGTACCGAGATCGGAAGAGCGGTTCAGCAGGAATGCCGA	1	-	1	1	1	1	1	1	1	1	1	1	1	1	1	1	1	1	-	1	1	1	1	1	1	1	1	1	1	1	1	1	1	1	1	1	1	1	1	1	1	-	1	1	1	-	1	1
4285231	TGCAGTGTCGTACCAGTACTATAGCTCGGTCCTCGCTCCGAGATCGGAAGAGCGGTTCAGCAGGAATGC	1	-	1	1	1	1	1	1	1	1	1	1	1	1	1	1	1	1	-	1	1	1	1	1	1	1	1	1	1	1	1	1	1	1	-	1	1	1	1	1	1	1	1	1	-	1	0	-
4269817	TGCAGGACACGAGCATCCAGGGCGCCGAGAGCCACCCGCTGCACCTGCACGGGTTCGACTTCTTTGTCG	1	1	1	1	1	1	1	1	1	1	1	1	1	1	1	1	1	1	1	1	1	1	1	1	-	1	1	1	1	1	1	1	1	1	1	1	1	1	1	1	1	1	1	1	1	1	1	1
4264710	TGCAGGCATGCATTTCATTGTGTGGGGTGGTCGATCGATCACCTTTGTGGAACCACGACCGAGATCGGA	-	1	1	1	1	1	1	1	1	1	1	-	1	1	1	1	1	1	1	1	1	1	1	-	1	1	1	1	1	1	-	1	1	1	-	1	1	1	1	1	1	1	1	1	-	1	1	1
4278370	TGCAGCTGGCCGCCGACGCTACGACAACGTTCCGCATGGCGGTGAACTGCCGAGATCGGAAGAGCGGTT	1	1	1	1	1	1	1	1	1	1	1	1	1	1	-	1	1	1	1	1	1	1	1	1	1	1	1	1	1	-	1	1	1	1	1	1	1	1	1	1	1	1	1	1	1	-	1	1
4302817	TGCAGGATGTGGTGAGGGCGCTGGCGATGGGGTCATGCCTGCCGAGATCGGAAGAGCGGTTCAGCAGGA	-	1	1	1	1	1	1	1	1	1	1	1	-	1	1	1	-	1	-	1	1	-	1	1	1	1	1	1	1	-	0	1	1	-	1	1	1	1	1	1	1	-	1	1	1	1	1	1
4277745	TGCAGGACGTGGCCGTGGCCGGCACCACCAGCAGCAAGGACGTGCTGGCCAAGCCGAGATCGGAAGAGC	1	1	1	1	-	1	1	1	1	1	1	1	1	1	1	1	1	1	1	-	1	1	1	1	1	1	1	-	1	1	1	1	1	1	1	-	1	1	1	1	1	1	1	1	1	1	1	1
4263999	TGCAGGACACGGACGCCACCAGCGTGGTGCACCGCATCATCTTCAAGGCCTTCGACGAGGCCCGAGATC	1	1	1	1	1	1	1	1	1	1	1	1	1	1	1	1	-	1	1	1	1	1	1	1	1	0	1	1	1	1	1	1	1	1	1	1	1	1	1	1	1	1	1	1	1	-	1	1
4303513	TGCAGAGCTGATGTGTCCACTACACATGGGCTAATAACCGAGATCGGAAGAGCGGTTCAGCAGGAATGC	-	1	1	1	1	1	1	1	1	1	1	1	1	1	1	1	1	1	1	1	1	1	1	0	1	1	1	-	-	1	1	-	1	1	1	1	-	1	1	1	-	1	1	1	1	-	1	1
4288552	TGCAGGTGACCCACCCGTACGTCTTGGCGTCCACCAGGAGCTCCAAGACGCGCCGAGATCGGAAGAGCG	1	-	1	1	1	1	-	1	1	1	1	1	1	-	1	1	1	1	-	1	1	1	1	1	-	1	1	1	1	1	1	1	1	1	1	1	1	1	1	1	1	-	1	1	1	1	1	1
4279387	TGCAGCGCCAGCCCCACGCCCGCCTCCATTGCTCGCCGAGATCGGAAGAGCGGTTCAGCAGGAATGCCG	1	-	1	-	1	-	1	-	1	1	1	1	1	-	-	1	1	1	1	1	1	1	1	1	1	1	1	1	1	1	1	1	1	1	1	1	1	1	1	1	-	1	1	-	1	1	1	0
4278048	TGCAGTATGCTGGTCATAACATCCAAGCCTTTCATCCGAGATCGGAAGAGCGGTTCAGCAGGAATGCCG	1	1	1	1	1	1	1	1	1	1	1	1	1	1	1	1	1	1	1	-	1	1	1	1	1	1	1	1	1	1	1	1	1	1	1	1	-	1	1	1	1	1	1	1	1	-	1	1
4265791	TGCAGATTCGCCGTCACCATCGCGGACGCACCAACTGCAACCGAGATCGGAAGAGCGGTTCAGCAGGAA	1	-	1	1	1	1	1	1	1	-	1	1	1	1	1	1	-	1	1	1	1	1	1	1	1	1	1	1	-	1	1	-	1	1	1	-	1	1	1	1	1	1	-	1	1	1	1	-
4284555	TGCAGGGAAGGAGATGAGCACCTCGTGCTGCTCCGCCAGCGCCCGATCACAGCCGAGATCGGAAGAGCG	1	1	1	1	1	-	1	1	1	1	1	1	1	1	1	-	1	1	1	1	1	1	1	1	1	1	1	1	1	1	1	1	1	1	1	1	1	1	1	1	1	1	1	1	1	-	1	-
4285578	TGCAGCCAAATCAAGAAATCGAATAAGAAATGCTGCCCCTTTCTCTCTCCGAGATCGGAAGAGCGGTTC	1	-	1	1	1	1	1	1	1	1	1	1	1	1	1	1	1	1	1	1	1	1	1	1	1	1	1	-	1	1	-	1	1	1	1	1	1	1	1	1	1	1	1	1	1	-	1	1
4284394	TGCAGAGGCCAATGTTGTGTTCTCGTCTCTTATGGGTGCTCGGGTAAGCAACCGAGATCGGAAGAGCGG	1	-	1	1	-	1	1	-	1	1	1	-	1	1	1	-	1	-	1	1	-	1	1	1	1	1	1	1	1	1	1	1	1	1	1	-	1	1	1	1	1	-	1	1	1	1	0	-
4275675	TGCAGCATGAATGGCAATGGCACCCAGTCCCAGTGCGGGTATCGAGTCGAGTACGGAGGAGGTTTAAAG	1	-	1	1	1	1	1	1	1	1	1	1	1	1	1	1	1	1	-	1	1	1	1	-	1	1	1	1	1	1	1	1	1	1	1	1	1	1	1	1	1	-	1	1	1	1	-	1
4297204	TGCAGCGCATCATGGACATGTACTGCGGCAAGCACTCGCTCAACCGAGATCGGAAGAGCGGTTCAGCAG	1	1	1	1	1	1	-	1	1	1	1	1	1	1	1	1	1	1	-	1	1	1	1	1	1	1	1	1	1	-	1	1	1	1	1	1	1	1	1	1	1	1	1	1	1	-	1	1
4290021	TGCAGCGCGGTGGACACGTCGCGCATGCGTTCCTGCGTGTAGTCCTCACGCCGAGATCGGAAGAGCGGT	1	-	1	1	1	1	1	1	1	1	1	1	1	1	1	1	1	1	1	1	1	1	1	1	1	-	1	1	1	1	1	1	1	1	-	1	1	1	1	1	1	1	1	1	1	1	1	1
4269872	TGCAGCGACGGGAAGGCGGCACCAGCACTGCTGCCACCGAGATCGGAAGAGCGGTTCAGCAGGAATGCC	1	-	-	-	1	-	1	1	1	1	1	1	1	1	1	-	1	1	0	-	1	-	1	1	-	1	-	1	1	1	1	1	1	1	1	1	1	1	1	1	1	1	1	1	1	1	1	-
4324948	TGCAGAGAAGCGACTCCCTTCCTGATTGAGCTCCTTGTCTGCTCTGCTGCCTGCCAAGGCCGAGATCGG	1	1	1	-	1	1	1	1	-	-	-	1	1	1	1	1	1	1	1	1	-	1	1	1	1	1	-	1	1	1	1	-	1	1	-	1	1	-	1	1	1	1	1	1	1	1	1	1
4289259	TGCAGACCGTCCAGACCGCACGGGCTGACGCCGACGCACTCGCGTGGACGCCGAGATCGGAAGAGCGGT	1	1	1	1	1	1	1	1	1	1	1	1	1	1	1	1	1	1	1	1	1	1	1	1	1	1	1	1	1	1	1	-	1	1	1	1	1	1	1	1	1	1	1	1	1	1	1	1
4289421	TGCAGATCGCGGTGGCGCTGCTCCTCCTGTATGCGTACCTCGGCCCGAGATCGGAAGAGCGGTTCAGCA	1	-	1	1	-	1	1	-	-	-	-	1	1	1	1	1	1	-	1	1	1	1	-	1	1	1	1	1	1	1	1	-	1	1	1	1	1	1	1	1	1	-	1	1	1	1	1	1
4271767	TGCAGCGCCAGCACCCCCATGAACAGCTTCACCTTCTCCCGAGATCGGAAGAGCGGTTCAGCAGGAATG	1	-	1	1	1	1	1	-	1	1	1	1	1	1	-	1	1	-	-	1	1	1	1	1	1	1	1	1	1	1	-	1	-	1	1	-	1	1	1	1	1	1	1	1	1	1	1	1
4275953	TGCAGAGCGCTCTCCCTGTGCATCACCAGCGACTCATGAGACCCTAAAGTAATCAACCCGAGATCGGAA	1	1	1	1	1	1	1	1	1	1	1	1	1	1	1	1	1	1	-	1	1	1	1	1	1	1	1	1	1	1	1	1	1	1	1	1	1	1	1	-	1	1	1	1	1	1	1	1
4264614	TGCAGCTTGTGGAGTTTGGCCGAGATCGCAAGAGCGGTTCAGCAGGAATGCCGAGACCGATCTCGTATG	1	-	-	1	-	-	1	1	1	1	1	1	1	1	1	1	-	1	1	1	1	1	1	1	1	-	1	1	1	1	1	-	-	1	1	0	1	1	1	1	1	1	1	1	1	1	1	1
4265998	TGCAGGGCAGCTACGAGCCGAGATCGGAAGAGTGGTTCAGCAGGAATGCCGAGACCGATCTCGTATGCC	1	1	1	1	1	1	1	1	1	1	-	1	1	1	1	1	1	1	-	-	1	1	1	1	1	1	1	1	1	1	1	1	1	1	1	-	1	1	1	1	1	1	1	1	1	1	1	1
4281582	TGCAGCAAGCGCTCTACTGGCACATCGAGGCCCGCGTCGTGCTGGATCTCCGAGATCGGAAGAGCGGTT	1	1	-	1	1	1	-	1	-	1	1	-	-	1	1	1	1	1	1	1	1	1	1	1	1	1	1	1	1	1	1	1	1	1	-	1	1	1	-	1	1	1	-	-	1	1	0	1
4271886	TGCAGGCTAGATAACTCGGAGACTCACTCCGGCATCAAATGATGAGAATCACCGAGATCGGAAGAGCGG	1	1	1	1	1	1	1	1	1	1	1	1	-	-	1	1	-	1	1	1	1	1	1	1	1	1	1	1	1	1	1	1	1	1	1	-	1	1	-	1	1	1	1	-	-	0	1	1
4278628	TGCAGCAAATAAAGGTTTGGAACGAAGGGAAAATAACCGAGATCGGAAGAGCGGTTCAGCAGGAATGCC	1	-	1	1	0	1	1	1	1	1	1	-	1	1	1	1	1	1	1	1	1	-	1	1	1	1	1	1	1	1	1	1	1	1	1	1	1	-	1	1	1	1	1	1	1	1	1	1
4328721	TGCAGCGGGTGCACCACTCCGCCGACGCCACCGACCGCGCCGAGATCGGAAGAGCGGTTCAGCAGGAAT	-	1	1	1	1	1	1	1	1	1	1	1	1	1	1	1	1	1	1	1	1	1	1	1	1	1	-	1	1	1	-	1	1	1	-	1	1	1	1	-	1	-	1	1	1	0	-	1
4281672	TGCAGGGCCATGGCCGTGGACGATGAGATGTCGCGCCGAGATCGGAAGAGCGGTTCAGCAGGAATGCCG	-	-	1	1	1	1	1	1	1	1	1	1	1	1	1	1	1	-	1	1	1	1	1	1	1	1	1	-	0	-	1	1	1	1	1	1	1	1	1	1	1	1	1	1	1	1	1	1
4302282	TGCAGGCGGAGGCTGCGCTTCTGGAGGTCGAGGAGGGAGGGCCGAGATCGGAAGAGCGGTTCAGCAGGA	1	1	1	-	1	1	1	1	-	0	1	1	1	-	-	1	1	1	1	1	1	1	1	1	1	1	1	1	1	1	1	1	1	1	1	1	1	1	1	1	1	1	1	1	1	1	1	1
4292052	TGCAGAGATTAGGGGGGAGCGTGCGGACGTGTTGCTGAGCCTGAGCCGCGGCGCGAATCCGTCCGAGAT	1	-	1	1	1	1	1	1	1	1	1	1	1	1	1	1	1	1	1	1	1	1	1	1	1	1	1	1	1	-	1	1	1	1	1	1	1	1	1	1	1	1	-	1	1	1	1	1
4299536	TGCAGCCGCCGTCCAAGCAGCCCCGCCTCTCCTCCGCCGACTCGAACGCCGAGATCGGAAGAGCGGTTC	-	1	1	1	1	1	1	1	1	1	1	1	1	1	1	1	1	1	-	-	1	1	1	1	1	1	1	1	1	1	-	1	1	1	-	1	1	1	1	1	1	1	1	1	1	1	1	-
4264618	TGCAGTCCAGGTCAGTGGGTTCAGCCTCAGTCCTCTTCATCCTCTGTCCGAGATCGGAAGAGCGGTTCA	1	-	1	1	-	1	1	1	1	1	1	1	-	1	1	1	1	1	-	1	1	1	1	1	1	1	1	1	1	1	1	1	1	1	1	1	1	1	1	1	1	1	1	1	1	1	1	1
4282829	TGCAGCTTAGATTTTGCTTTGTTTTATCAGGCGCGAGGTAGATGGTGGCCGTACCGAGATCGGAAGAGC	1	-	1	1	1	1	-	1	1	1	1	1	1	1	1	1	-	1	-	1	1	1	1	-	1	-	1	1	1	1	1	1	1	1	1	1	1	1	1	1	1	1	1	1	1	-	1	1
4287794	TGCAGTCGGCCACGGCCCACGAGATCGCTGCTGCGCGACCCGAGATCGGAAGAGCGGTTCAGCAGGAAT	1	-	1	1	1	1	1	-	1	1	1	1	1	1	1	1	1	1	1	1	1	1	1	1	1	1	1	1	1	1	1	1	1	1	1	1	1	-	1	1	1	1	1	1	1	-	-	-
4263870	TGCAGGTCGTGCCGGACACCGTGTTCCAGCTCCACACCACGCGCACCCCGAGATCGGAAGAGCGGTTCA	1	1	-	1	1	1	1	1	-	1	1	1	1	-	1	1	1	1	1	-	-	1	1	-	1	1	1	1	1	1	1	1	1	1	1	-	1	1	1	-	-	1	1	-	1	1	1	1
4279962	TGCAGGAAGTCGTCGTCGCTGTAGCCGTCCTTGAGCCTCTGGTTGAGCACCGCCACGAACCCCGAGATC	1	1	1	1	1	1	1	1	-	1	1	1	1	1	1	1	1	1	1	1	1	1	1	1	1	1	1	1	1	1	1	1	1	1	1	1	1	1	1	1	1	1	-	1	1	1	1	-
4272228	TGCAGGAATTATTCTTGGCCCAGCATGGAAGTGGGCAACACAGCCCCGAGATCGGAAGAGCGGTTCAGC	1	1	1	1	1	1	1	1	1	1	1	-	1	1	1	1	1	1	-	1	1	1	1	1	1	1	1	1	1	1	1	1	1	1	-	1	1	1	1	1	1	1	-	1	1	-	0	-
4305882	TGCAGTGCGGTAGTGGGGCACCAGGGGCAGGCTGAATCCGAGATCGGAAGAGCGGTTCAGCAGGAATGC	-	1	1	-	1	1	1	1	1	1	1	1	1	-	1	1	-	1	1	1	1	1	1	1	1	-	1	1	1	1	1	1	1	1	1	1	1	1	1	-	1	-	1	-	1	1	1	1
4273489	TGCAGATGCAGAGCGACCTCGACGCTCTCGCCGGGAAGCTGGACCTCAACCTCCGAGATCGGAAGAGCG	-	1	1	1	1	1	1	1	1	1	1	1	1	-	1	-	1	1	1	1	1	1	1	1	-	1	1	1	1	1	1	1	1	1	1	1	1	1	1	-	1	1	-	1	1	1	-	1
4301794	TGCAGCTCCTGGTGGTAGCTGCACGACTCGTTGTGGTTGGGCGTCTTGCACGCAACGTGCGGGAAACGG	1	1	1	1	1	1	1	1	1	-	1	1	1	1	1	1	1	1	-	1	1	1	1	1	1	1	1	1	1	1	1	1	1	1	1	1	1	-	1	1	1	1	1	-	1	1	1	1
4281555	TGCAGAGGGTGTGCCGGCAACGCCTACAGAGCTTGTCTGGCTGCCTGACCGCAACACGCCGAGATCGGA	-	1	1	1	1	1	1	1	-	-	-	-	-	1	1	1	1	1	1	-	1	1	1	1	1	1	1	1	1	1	1	1	1	1	-	-	1	1	1	1	1	1	1	1	1	0	1	1
4293494	TGCAGAAGCTGTATCTGTTCAACAACATGCTCCACGGCCCGAGATCGGAAGAGCGGTTCAGCAGGAATG	1	-	1	1	1	1	1	1	1	1	1	1	1	1	1	1	1	1	-	1	1	1	1	1	1	1	1	1	1	1	1	1	1	1	1	1	1	1	1	1	1	1	1	1	1	1	1	-
4292140	TGCAGAGGTGGGGCGGCATCAAGAACATCACCGTGGATGAGGCCAAGGCCAGGATCGCCGACATCCTGG	1	1	1	1	1	1	1	1	1	1	1	1	-	1	1	1	1	1	1	1	1	1	1	1	-	1	1	1	1	1	1	1	1	1	1	1	1	1	1	1	1	1	1	1	-	-	1	-
4302446	TGCAGGTGACGTGCAGAGCCGAGGCAATGCAAGCAGAGGAGAGGAGCCCCAACACCAGATCTCATGGCA	-	1	1	1	1	1	1	1	1	1	1	-	1	1	1	1	1	1	1	1	1	1	1	1	1	1	1	-	1	1	1	1	1	1	1	-	1	1	1	1	1	1	1	1	-	1	-	1
4326943	TGCAGAGGGGAACATTGGGGAGGGCGTCGCGGCGGAGGGGCCGAGATCGGAAGAGCGGTTCAGCAGGAA	-	1	1	1	-	-	-	1	1	1	1	1	1	1	1	1	1	1	1	1	1	1	1	-	1	1	1	1	1	1	1	1	1	1	1	1	1	1	1	1	1	1	1	1	-	1	0	1
4297278	TGCAGCTTGCCATCCTCGCCGCCACCGTAACTTACCAAATCGGTCTGAACCCGCCAGGAGGGTTTTGGC	-	-	1	1	-	1	1	1	1	1	1	-	1	1	1	-	1	1	1	1	1	1	1	-	-	1	1	1	1	-	1	1	1	1	-	1	1	1	1	1	1	1	-	1	1	-	-	1
4298765	TGCAGCCCAGTGAGGAGCGTCTTGGGGGACTGTACGCGCCGAGATCGGAAGAGCGGTTCAGCAGGAATG	1	-	-	1	-	1	1	1	-	1	-	1	1	1	1	1	1	1	1	-	-	1	1	-	1	1	1	1	1	1	1	1	-	1	1	-	1	1	1	1	1	-	1	1	1	1	1	1
4273432	TGCAGCACCGACGGCGCCATCAACACCTTGGCCTCCGAGATCGGAAGAGCGGTTCAGCAGGAATGCCGA	1	1	1	1	1	1	1	1	1	1	1	1	1	1	1	1	1	1	1	1	1	1	1	1	1	1	1	1	1	1	-	1	1	1	1	1	1	1	1	1	1	1	1	1	1	1	1	1
4285566	TGCAGCTGGTCAAGGAGAGGAGCTCTAGGCCGTGGCAGGCGTCAAGGAGACCGAGATCGGAAGAGCGGT	1	-	1	1	1	1	1	1	1	1	1	1	1	1	1	1	-	1	-	1	1	1	1	-	1	1	1	1	1	1	1	1	1	1	1	-	1	1	1	1	1	1	1	1	1	1	1	1
4300171	TGCAGGGTCAGCAACCACACACCAGACGCGCGTCAGCCGAGATCGGAAGAGCGGTTCAGCAGGAATGCC	1	1	1	1	1	1	1	1	1	1	1	1	1	1	1	1	-	-	-	1	1	1	1	1	1	-	1	1	1	1	1	1	1	1	1	1	1	1	1	1	1	1	1	-	1	1	-	-
4268981	TGCAGGCCGCCACGCTTAACCCGTCGGCGTGCTCCGCCTCCGAGATCGGAAGAGCGGTTCAGCAGGAAT	1	-	1	-	1	1	1	1	-	1	0	1	1	-	1	1	1	-	1	1	1	1	1	1	1	1	-	1	1	1	-	1	1	1	1	1	1	1	1	1	1	1	1	1	1	1	1	1
4279115	TGCAGCGACAGCTTCGACCTCTACAACGGCCTCTTCATGTACAACAAGAACTCGACGGAGCTGCTCCAC	1	-	1	1	1	1	1	1	-	1	1	1	1	1	1	1	1	1	1	1	1	1	1	1	1	1	1	1	1	1	-	1	1	1	1	1	1	1	1	1	-	1	1	1	1	0	-	1
4263877	TGCAGCCGCGACAAGGACGTCAGGGCCAGGTTCACCCTCAACCTCATGGAGAACGACGGCCGCCTGTCC	1	1	1	1	1	1	1	1	1	-	1	1	1	1	1	1	1	1	-	1	1	1	1	-	1	1	1	-	1	1	1	1	1	1	1	-	1	1	1	1	1	1	1	1	1	-	1	1
4279783	TGCAGGTCGCTCCACTGGTCGCCGACGTTGCCGCGGATCCGAGATCGGAAGAGCGGTTCAGCAGGAATG	1	-	0	1	1	1	-	1	1	1	1	1	1	1	1	1	1	1	1	1	1	1	1	-	-	1	1	1	-	1	1	1	1	1	1	1	1	1	1	-	1	1	1	-	1	-	1	1
4270548	TGCAGCTCATAGGGTTGTTACTTACCATAAAGAGGCCCCAGGACTCGATGGCTGACCGAGATCGGAAGA	1	-	1	1	1	1	1	1	1	1	1	-	-	1	1	-	-	1	1	1	1	1	1	1	1	1	1	1	1	-	1	1	1	1	1	0	1	-	1	-	1	1	1	1	1	1	-	1
4278281	TGCAGGAAGCACGGCGTCCCGAGGGAGTTCCTCGCGCGCCCCGCCGAGATCGGAAGAGCGGTTCAGCAG	1	1	1	1	1	1	1	1	1	1	1	1	1	-	1	1	1	1	-	1	1	1	1	1	1	1	1	1	1	1	1	1	1	1	1	1	1	1	1	1	1	1	-	1	1	-	1	1
4302761	TGCAGTGAGGCATCCAGCTCGACTTCGCCATGCGGGTCGCGCTCCACGTTCGTCCCATCGCCGAGATCG	1	-	1	1	1	1	1	1	1	1	-	-	1	1	1	1	1	1	-	1	1	1	1	1	1	1	1	-	1	1	1	1	1	1	1	-	1	1	1	1	1	1	1	1	-	1	1	1
4277280	TGCAGACCTTCATCAGCGTCAGCATAGTGGCCTTCATCCCGAGATCGGAAGAGCGGTTCAGCAGGAATG	1	1	1	1	1	1	1	1	1	1	1	1	1	1	1	1	1	1	1	1	1	1	1	-	1	1	-	1	-	1	1	1	1	1	1	1	1	1	1	1	1	1	1	1	1	0	-	1
4320772	TGCAGTAGCGCGTGTAGTAGCCGATGCGGTCGACGTTGGCGTCGTTCCGAGATCGGAAGAGCGGTTCAG	1	1	1	1	-	1	1	1	1	1	1	-	1	1	1	1	-	1	1	1	1	1	1	1	1	-	1	1	1	1	0	1	1	1	1	-	1	1	1	1	1	1	1	1	-	1	1	1
4269547	TGCAGCTTGTGGTGTCGGAACTGTGCCGAGTCCAGGAGCTGGTCCGAGATCGGAAGAGCGGTTCAGCAG	1	1	1	1	1	1	1	1	-	0	-	1	1	1	1	1	1	1	1	1	1	1	1	1	1	1	1	1	1	1	1	1	1	1	1	1	1	1	1	1	1	1	1	1	1	-	1	1
4284386	TGCAGCTGCATGCGATGGGGTGCCGTGCTTGAACGCTTTGTTGTGCCTCCACCATGTAGTTTCTCCGAG	1	1	1	1	1	1	1	1	1	1	1	1	1	1	1	1	1	1	1	1	-	1	1	1	1	1	1	1	1	1	1	1	1	1	1	1	1	1	1	1	1	1	1	1	1	-	1	-
4278213	TGCAGCATACTACGTGCCGCAGCCCAAGGCCTCTGGGCGGCGCCCGAGATCGGAAGAGCGGTTCAGCAG	1	1	1	1	-	1	1	1	1	1	1	1	1	1	1	1	1	1	1	1	1	-	1	1	1	1	-	1	-	1	1	1	1	1	1	1	1	1	1	-	1	1	-	1	-	1	1	1
4293369	TGCAGAGCAGCAGCAGGATCCATCTCGTATGGCTGTCTGTTGCCGTCACCGAGATCGGAAGAGCGGTTC	1	1	1	1	1	-	1	1	1	1	1	1	1	1	1	1	1	1	1	-	1	1	1	1	1	1	1	1	1	1	-	1	1	1	1	-	1	1	1	-	1	1	1	1	1	-	1	1
4303186	TGCAGTCCGATGCCGCCCACGGGGGCGCCCTTCTCCATGAGCGCGTTGACCTGCGCGATGTACTTCTCC	1	1	1	1	1	1	1	1	1	1	1	0	1	1	1	1	1	1	1	1	1	1	1	1	1	1	1	-	1	1	1	1	-	1	1	1	1	1	1	1	1	1	1	1	1	-	1	1
4277484	TGCAGCTGCATGTTGCTGCCTTGCCGCTTACTTTAACCCGAGATCGGAAGAGCGGTTCAGCAGGAATGC	1	-	1	1	-	1	1	1	1	1	1	1	1	1	-	-	1	1	1	1	1	1	1	1	1	1	1	1	1	1	1	1	1	1	1	1	1	1	1	1	1	1	1	1	1	1	1	-
4304818	TGCAGCAATGGCCGCCGCGGTTGGAGCCCGAGCCAGCTCCGATGATGTCGACCGAGATCGGAAGAGCGG	1	1	-	1	1	1	1	-	1	1	1	1	1	1	1	1	1	1	-	1	1	1	1	1	1	-	1	1	1	1	1	-	-	1	1	-	1	1	1	1	1	1	1	1	1	-	1	1
4275647	TGCAGAATGAATTTGATCTTCCTTCATCATCTGGAAGGTAGCATCTGGAGCGGAGCTGGTTTAGGGGAC	1	1	1	1	1	1	1	1	1	1	1	1	1	1	1	1	1	1	1	1	1	1	1	-	1	1	1	1	1	1	1	1	1	1	1	1	1	-	1	1	1	1	1	1	1	-	1	1
4263684	TGCAGAGCATATACGAGACGGTGAAGAGCCTCCAGGAGAAAGGGATGCTGCCGAGATCGGAAGAGCGGT	1	-	1	1	-	1	1	1	1	1	1	1	1	1	1	1	1	1	-	-	1	1	1	-	1	1	-	1	1	1	1	1	1	1	1	1	1	1	1	-	1	1	1	1	-	-	-	1
4272938	TGCAGCGTCGCGTTCGGCGTGGACGACGATGGGTCGTCGGCGCTGCTGGATGATCACCGAGATCGGAAG	1	-	1	1	1	1	1	1	1	1	1	1	1	1	1	1	1	1	1	1	1	1	1	1	1	1	1	1	1	-	1	1	1	1	-	1	1	1	1	1	1	1	1	1	1	1	1	1
4286903	TGCAGATCTCCACCATGTTCACGCACCACCAGAAGACCGTCATCGTGGACCACGACATGCCCCAGGGCG	-	1	1	1	1	1	1	1	1	1	1	1	1	1	1	1	1	1	-	-	1	1	1	1	1	1	1	1	1	1	1	1	1	1	1	-	1	1	1	1	1	1	1	1	1	-	1	1
4279328	TGCAGAAAGCCGGAATCTCGTCGTGCACTGCACTGGCGACGGCGCATGCAGCACAACACTTGGCAAGCC	1	-	1	1	1	1	1	1	-	1	1	1	1	1	1	1	1	1	1	1	1	1	1	1	1	1	1	1	1	1	1	1	1	1	1	1	1	1	1	1	1	1	1	1	1	1	1	1
4328460	TGCAGCTGGTCCCGCCGCTCAACTTCGCCATGGTGGACCACGGCGTGTACCGCTCCGAGATCGGAAGAG	1	-	1	1	-	1	1	1	1	1	1	1	1	1	1	1	1	1	1	1	1	1	1	-	1	1	1	1	1	1	1	1	1	1	1	1	1	1	1	1	1	1	1	1	1	1	1	1
4271537	TGCAGAACGAGTCAATGGCAGCAATGTACGTGAAGTTCTCCGAGATCGGAAGAGCGGTTCAGCAGGAAT	1	-	1	1	1	1	1	1	1	1	1	1	1	1	1	1	-	1	1	-	1	1	1	1	1	1	1	1	1	1	-	1	-	1	0	1	1	1	1	1	1	1	1	1	1	-	1	1
4303448	TGCAGGTGGAAAACAAAAGTTTCCGTCAGCCCCGACCCACGCCCCGCAGTCCGAGATCGGAAGAGCGGT	1	1	1	1	1	1	1	1	1	1	1	-	1	1	1	1	1	1	1	1	1	1	1	1	1	1	1	1	1	1	1	1	1	1	1	1	1	1	1	1	1	1	1	1	1	1	1	1
4271106	TGCAGGAGCAGTGCTCGCCGCAGGTGCAGGTGGTGTGCGCCACGGCCGCGGGGTTCACCGAGATCGGAA	1	-	1	1	1	1	1	1	1	1	1	1	1	1	1	1	1	1	1	1	1	1	1	-	1	1	1	1	1	1	1	-	1	1	1	-	1	1	1	1	1	1	1	1	-	1	1	1
4319637	TGCAGAACTGTGAGAATTGTCCAAAGTCATGACTTACAGGCCACCAACGATTGCGGAGAAGATGGCCGT	1	1	1	1	1	1	1	1	1	1	1	-	-	1	1	1	1	1	1	1	1	1	1	1	1	1	1	1	1	1	-	1	1	1	1	-	1	1	1	1	1	1	1	1	1	-	-	-
4298036	TGCAGGGGAAGTTCCTGCTCAACAGCACCGTGGCCAAGGCCACCATCTACGTCGAAGGGCCCAAGGCCG	1	1	1	1	1	1	1	1	1	1	1	1	1	1	1	1	1	1	1	1	1	1	1	1	1	1	1	1	1	1	1	1	1	1	1	1	1	-	1	1	1	1	1	1	1	1	1	1
4282916	TGCAGGGCTGGAAGGGGAAGAGCCAGCTGATGGAGGACGAGGCTTTCTTCGACGCACTGGTCTCCGAGA	1	1	1	1	1	1	1	1	1	1	1	1	-	1	1	1	1	1	-	-	1	1	1	-	1	1	1	1	1	1	1	1	1	1	1	0	1	1	1	1	1	1	1	1	1	1	1	1
4275772	TGCAGGCCAGCATCATCTCGCCCTAGCTCCATGGCTAGCGGGCATTTGACATGGATTCCGAGATCGGAA	1	1	1	1	1	1	1	1	1	1	1	1	1	1	1	1	1	1	-	-	1	-	1	1	-	1	1	1	1	1	1	1	1	1	-	-	1	1	-	1	1	1	1	1	-	1	1	1
4270707	TGCAGGTACCCGGACGCCTGACGCCCTAGCTTCGCCGTGAACAACGCGGCCATCGCCTTCGCCGAGATC	1	-	1	1	1	-	1	-	1	1	1	1	1	1	1	1	1	1	1	1	1	1	1	1	1	1	1	1	1	1	1	1	1	1	1	1	1	1	1	1	1	1	1	1	1	1	0	1
4282438	TGCAGAACCCAAGAAGACTTGCGTCCTACGATGCTTCAGCCGAGATCGGAAGAGCGGTTCAGCAGGAAT	1	1	1	1	1	1	1	1	1	1	1	1	1	1	1	1	1	-	-	1	1	1	1	1	1	1	-	1	1	1	-	1	1	1	1	1	1	1	1	1	1	-	1	1	-	1	-	-
4293961	TGCAGGCTCATCAGGTGCTCGTAGGTGGACGGCCTGTCGCCGCCGAGATCGGAAGAGCGGTTCAGCAGG	1	-	1	1	1	1	1	1	1	1	1	1	1	1	1	1	1	1	-	1	1	-	1	0	1	1	-	-	1	1	1	1	1	1	1	1	1	1	1	-	1	1	1	1	1	1	1	-
4266922	TGCAGGCCGCGGGGCACGACGTAGAGCTCGTTCTTCTTCACGACCTTGGAGTAGAGCCGAGATCGGAAG	1	-	1	1	1	1	1	1	1	1	1	1	1	1	1	1	1	1	0	1	1	1	1	1	1	1	-	1	1	-	1	1	1	1	1	1	1	1	1	1	1	1	1	-	-	1	1	-
4297309	TGCAGGGCGGCACCCAGATGCTGGCCTGCCAGATCGTGGTGGGCAGCCTGATCGGCGCCAAGTTCGGGT	-	-	1	1	1	1	1	1	1	1	1	1	1	1	1	1	1	-	1	1	1	1	1	-	1	1	1	1	1	1	0	1	-	-	-	-	1	1	1	1	1	1	1	-	1	1	1	1
4276528	TGCAGACGTTCATCAGCCTGACCATCATCACCTTCATCCCTGTCTACGACCGAGATCGGAAGAGCGGTT	-	1	-	1	1	1	1	-	1	-	-	1	1	1	1	1	-	-	1	-	1	1	1	1	1	-	1	1	1	1	-	1	-	1	1	1	1	1	1	1	1	1	1	1	1	-	1	-
4284842	TGCAGATATCCGATAGCTGTGACGGGGAGCAGACACCTCCGTCCCTCGACAGCATGCCTTTGTTGACGA	1	1	1	1	1	1	1	1	1	1	1	1	-	1	1	1	1	1	1	1	1	1	1	1	-	1	1	1	1	1	1	1	-	1	1	1	1	1	1	1	1	1	1	1	1	-	1	1
4273292	TGCAGGCACCGCATGGACCTCCTTTTCTGCATTATTGCCTCACGTACCGAGATCGGAAGAGCGGTTCAG	-	-	1	1	1	1	1	1	1	1	1	1	1	1	1	1	1	1	1	1	1	1	-	-	1	1	1	1	-	1	1	1	1	1	1	-	1	1	1	1	1	1	1	1	1	1	1	1
4284247	TGCAGGGAAGGGGACCTCGCCGAGCTCCACGAGCCTTGGCACGGACAGGTACGCCAAGTAGCTGCACGC	1	-	1	1	1	1	1	1	1	1	1	1	1	1	1	1	1	1	1	1	1	1	1	1	-	1	1	1	1	1	-	1	1	1	1	1	1	1	1	1	-	1	-	-	1	1	1	1
4326700	TGCAGCGTCTCCGTGTGGTCCGCGCGGGTCTCAACGACCTTTCCGAGATCGGAAGAGCGGTTCAGCAGG	1	-	1	1	1	1	1	1	-	1	1	1	1	1	-	1	1	1	1	-	1	1	1	1	1	1	-	1	1	1	-	1	-	1	1	0	1	1	1	1	1	1	1	-	1	1	1	1
4303738	TGCAGAAAGAGCATGCGGTTCAGCATGTTCTCCGAGATCGGAAGAGCGGTTTAGCAGGAATGCCGAGAC	1	-	1	1	1	1	1	1	1	-	1	1	1	1	1	1	1	1	1	1	1	1	1	1	1	1	1	1	1	1	1	1	1	1	1	1	1	1	1	1	-	1	1	1	1	0	1	1
4308838	TGCAGTTGTTGCCAAGACGGCCACGGAAGCGGAAGCGCGGGCCAGCGCACCCCCAGCCGAGATCGGAAG	1	1	1	1	1	1	1	1	1	1	-	1	1	1	1	1	1	1	-	1	1	1	1	1	1	1	1	1	1	1	1	1	1	1	1	1	1	1	1	1	1	1	1	1	1	1	-	1
4276299	TGCAGGGATGGGATGTTGGGGGTCGTCCTGCCTACGTTTGTTGGCCATAAAAGCCCAGATAAGCTTCCG	1	-	1	1	1	1	1	1	1	1	1	-	1	1	1	1	1	1	-	1	1	1	1	1	1	1	1	1	1	1	1	1	1	1	1	1	1	1	1	1	1	1	1	1	-	1	1	1
4304960	TGCAGCTGCGTGAGGTGGAGCGTGACGCCCGAGGCCGAGATCGGAAGAGCGGTTCAGCAGGAATGCCGA	1	1	-	1	1	1	1	1	1	1	-	1	1	1	1	1	1	1	1	1	1	1	1	1	1	1	1	1	1	1	-	1	-	1	1	1	1	-	1	1	1	1	-	1	1	1	1	1
4266384	TGCAGCCTCCCGGCCTGGCTGGTGCTCGACAACAAGCCACCGAGATCGGAAGAGCGGTTCAGCAGGAAT	-	-	1	1	1	-	1	1	1	1	1	1	1	1	1	1	1	1	1	1	1	1	1	1	1	1	1	1	1	1	-	1	1	1	-	1	1	1	1	-	1	1	1	1	1	1	1	1
4280056	TGCAGTCCGTGGTGAAGGAGACGCTCCGCCTCCGCATGGCCATCCCGCTCCTGGTGCCGCACATGAACC	1	1	1	1	1	1	1	1	1	1	1	1	1	1	1	1	1	1	1	1	1	1	1	1	1	1	1	1	1	1	1	1	1	1	1	1	1	-	1	1	1	1	1	1	1	-	1	1
4326919	TGCAGGGCGACATGCGGGAGCTCCCGTTCACCCTGGCCGAGATCGGAAGAGCGGTTCAGCAGGAATGCC	1	-	1	1	1	1	1	1	1	1	1	-	1	1	1	1	-	1	1	1	1	1	1	1	1	1	1	1	1	1	1	1	1	1	-	1	1	1	1	1	1	1	1	1	1	1	1	1
4282876	TGCAGGGGTACTACGCACGGCAGTCAAAATCTATACCGAGATCGGAAGAGCGGTTCAGCAGGAATGCCG	1	-	1	1	-	1	-	1	1	1	1	-	1	1	1	1	-	1	1	1	1	1	1	1	1	1	1	-	1	1	1	1	1	1	1	1	1	1	1	1	1	1	-	1	1	0	1	1
4282211	TGCAGCTAGTTTAGTTCAAGGATAGGTGCGTTACCATGGAACTTTGGCCGAGATCGGAAGAGCGGTTCA	-	-	1	1	1	1	1	1	1	1	-	-	1	1	1	1	-	1	1	1	1	1	1	1	1	1	1	1	1	1	1	-	1	1	1	1	1	1	1	1	1	1	1	1	1	1	1	1
4272825	TGCAGCAGGCGCGAAATCTCCAGGAGGCGCGAGTTGAGGTTGTGCACCTCGGGATCCATCTCGGCGGCG	1	1	1	-	1	1	1	1	1	1	1	1	1	-	1	1	1	1	1	1	1	1	1	1	-	1	1	1	1	1	1	1	1	-	1	1	1	1	1	1	1	1	1	1	1	-	-	1
4283997	TGCAGCGCCCGCGCCTTGGTCTCGATGATGGCCTGCCCGCAGAACTGGTTGCCGAGATCGGAAGAGCGG	1	-	1	1	1	1	1	1	1	1	1	-	1	1	1	1	1	1	1	1	1	1	1	1	1	1	1	1	1	1	1	1	1	1	-	1	1	1	1	1	1	1	1	1	1	1	1	1
4271709	TGCAGCGCGAAGTGCACAGTGTTCATCAGCAGCGGCGCCGAGATCGGAAGAGCGGTTCAGCAGGAATGC	1	1	1	1	1	1	1	1	1	1	1	1	1	1	1	1	1	1	1	1	1	-	1	1	1	1	1	1	1	1	1	1	1	1	-	1	1	1	1	-	1	1	1	1	1	1	-	1
4286126	TGCAGGATGATCTCCCCGTGGTGCGGCACGGACAGGTAGCTCTTCTCCGCCCTGCGGATGACCTCGGCG	-	-	1	1	-	1	1	1	1	1	1	1	1	1	1	1	1	1	1	1	1	1	1	-	1	1	1	1	1	1	1	1	1	1	1	1	1	1	1	1	1	1	1	1	1	1	1	1
4279972	TGCAGCAGGAGAAGGAAGAAAGGATGCCTTATCAGACTGTAAAAGATAGAATTTGGAAATTTCCGAGAT	1	-	1	1	1	1	1	1	1	1	1	1	1	1	1	1	1	1	-	1	1	1	1	1	1	1	1	1	1	1	1	1	1	1	-	1	1	1	1	1	1	1	1	1	1	-	1	1
4288558	TGCAGCCGCAGCAGGCTCATGTTCTTCATCAGCCCGCCGCCGAGATCGGAAGAGCGGTTCAGCAGGAAT	1	1	1	1	1	-	1	1	1	1	1	1	1	1	-	1	1	1	1	1	1	1	1	1	1	-	1	1	1	1	1	1	1	1	1	-	1	1	1	1	1	1	1	1	1	1	1	1
4292361	TGCAGCTGATGGAACCAGGCGTGAGTTGGCTCCTAGCGTAGACTAGCCTGTGTCCGAGATCGGAAGAGC	1	-	1	1	1	1	1	1	1	1	-	1	1	1	1	-	1	1	1	1	1	1	1	1	1	1	1	1	1	1	1	1	1	1	1	-	1	1	1	1	1	-	1	1	1	1	0	1
4292692	TGCAGCGCCAAGGGCACAATCAGGAACGGCAAGCCGAGATCGGAAGAGCGTTTCAGCAGGAATGCCGAG	1	-	1	1	1	1	1	-	1	1	1	1	1	1	1	1	1	1	1	1	1	1	1	1	1	1	1	1	1	1	-	1	-	1	0	1	1	1	1	1	1	1	1	1	1	1	-	1
4312304	TGCAGTTCCTCCCCCCGCCCTTCTTCAACCTCACGCAGCTCGTCGACAGCTTCAAGGCCAAGAACATGA	1	-	1	1	1	1	1	1	1	1	1	-	1	1	1	1	1	1	1	1	1	1	1	1	1	1	1	1	1	1	1	-	1	1	-	-	1	1	1	1	1	1	1	1	-	-	1	1
4275048	TGCAGGCGAAAACTCAGCGAAAAAACTTGACCGCCTTCTCCGAGATCGGAAGAGCGGTTCAGCAGGAAT	1	1	1	1	-	1	1	1	1	1	1	-	-	1	1	1	1	1	1	1	1	1	1	1	1	-	1	0	1	1	1	1	1	1	-	1	1	1	1	1	1	1	1	1	1	1	-	1
4328284	TGCAGAGATCATTTTGAGACGCCATGGATGCGAGCGCGCCCGAGATCGGAAGAGCGGTTCAGCAGGAAT	-	-	1	1	1	1	1	1	1	1	1	-	-	1	1	1	1	1	1	-	1	1	1	1	1	-	1	1	1	1	1	1	1	1	1	1	1	1	1	-	1	1	1	1	1	1	-	-
4302268	TGCAGGAGTACAAGGCCCACGCCGACAGCTTCATCTGCTCCATGGTGCCCGAGATCGGAAGAGCGGTTC	1	1	1	1	1	1	1	-	1	1	1	1	1	1	1	1	-	1	1	-	1	1	1	1	1	1	1	1	1	1	1	1	1	1	-	1	1	1	1	1	1	1	1	1	1	1	1	1
4327730	TGCAGTTGCACGAGCCGCCGTCAACCGCGGCCTCAGCCATCCTCTGGAACGGGCACAGCCTCTGCGCCT	1	-	1	1	1	1	1	1	-	1	1	-	1	1	1	1	1	1	-	0	1	1	1	1	1	1	1	-	1	1	1	-	1	1	1	1	1	1	1	1	1	1	1	-	1	1	1	1
4281496	TGCAGCAGCAGCCGCATCACAAGGTGCAGGAGATGGGCAGCAGCAACAGCAGCAGCTTCAGCGACGACC	1	1	1	1	1	1	1	1	1	1	1	1	1	1	1	1	1	1	-	-	1	1	1	1	1	1	-	1	1	1	-	1	1	1	1	1	1	1	1	1	1	1	1	1	1	-	-	-
4286095	TGCAGTTGGTCTGCTGCTCCGCGAAGAAGGGCCAGCTGAGCATCGGCACGCCGTTGGAGATGCTCTCCA	-	1	1	1	1	1	1	1	1	1	1	1	1	1	1	1	1	1	-	1	1	1	1	1	1	1	1	1	1	1	1	1	1	1	1	1	-	1	1	1	1	1	1	1	1	1	1	-
4264089	TGCAGCGGTGAAGCTCCCCGTTCCCCGCCGCGCGATTGGGTTGAAGTAAGAGAAGATGACCACCGAGAT	1	-	1	1	1	1	1	1	1	1	1	1	1	1	1	1	1	1	1	1	1	1	1	-	1	1	1	1	1	1	1	1	1	1	1	1	1	-	1	1	1	1	1	1	-	1	1	-
4266502	TGCAGAGCGAGGAAGAGCGTCGCCATGGCGGACCCAGGTTCTTTCTCGAGCGGGCCGAGATCGGAAGAG	1	1	1	1	1	1	1	1	1	1	1	1	1	1	-	1	1	1	1	-	1	1	1	1	1	1	1	1	1	1	-	1	-	1	1	1	1	1	1	1	1	1	1	-	1	-	1	1
4327240	TGCAGCCGCATGTGATAGATATCATCCCTCATCGTCGCGAACGCTGGTCCGAGATCGGAAGAGCGGTTC	1	1	1	1	-	1	1	1	1	1	1	-	1	1	1	1	-	1	1	1	1	1	1	1	1	1	1	1	-	1	1	1	1	1	1	1	1	0	1	1	1	1	1	1	1	-	1	-
4283403	TGCAGGCACGCACATGAGCATGCAAGGCATGCGTAGGAGAGCCGAGATCGGAAGAGCGGTTCAGCAGGA	1	1	-	1	1	1	1	1	-	1	1	1	-	1	1	1	1	1	1	-	1	1	1	1	1	1	1	1	1	1	1	-	-	1	1	1	1	1	-	-	1	1	1	1	1	-	1	0
4282836	TGCAGCTTGTACCTCCCCTCGGGCGTCTTGAAGTAGGTCTTGAGCCCGAGATCGGAAGAGCGGTTCAGC	1	1	1	1	1	1	1	-	1	1	-	1	-	1	1	1	1	1	1	1	1	1	1	1	1	1	1	1	1	1	1	1	-	-	1	-	1	1	-	1	1	1	1	-	-	1	0	-
4282752	TGCAGGGGCCCTTCTCCATGCGCATCACCAGCGACTCCGAGATCGGAAGAGCGGTTCAGCAGGAATGCC	1	1	1	1	1	1	1	0	1	1	1	1	1	1	1	1	1	1	1	1	1	1	1	1	1	1	1	1	1	1	1	1	1	-	1	1	1	1	1	1	1	1	1	1	-	-	1	-
4325718	TGCAGCTACAGAGACGTCAGGGTGCCCGTTGTGGGAGAGGAAGAAGAATGTCAGGATGATGCGAACGCC	1	1	1	1	1	1	1	1	1	1	1	1	1	1	1	1	1	-	1	-	1	1	1	1	1	1	1	1	1	1	1	-	1	1	1	1	1	1	1	1	1	1	1	1	1	1	1	1
4300984	TGCAGCAAGGCGTCGGACCTTTGGGTGTGCGCCATCCCCTCTCGATTGGATGTCCCCGAGATCGGAAGA	1	1	1	1	1	1	1	1	1	1	1	1	1	1	1	-	-	1	1	0	1	1	1	-	1	1	1	-	1	1	1	1	1	1	1	-	1	1	1	-	1	1	1	1	1	1	1	-
4266198	TGCAGGACAATCTGGAGTGGGAGGACGTGCAGTGGTCGCAGACCGAGATCGGAAGAGCGGTTCAGCAGG	1	1	-	1	1	1	1	1	1	1	1	1	1	1	1	1	1	1	-	1	1	1	1	1	1	1	1	1	1	1	1	1	1	1	1	-	1	1	1	1	1	1	1	1	-	-	-	1
4283988	TGCAGGTCATCGAAGGCGTCGCCGCCTGCCACCGCGCCGAGATCGGAAGAGCGGTTCAGCAGGAATGCC	-	1	1	1	1	1	1	1	1	1	1	1	1	1	1	1	1	1	1	1	1	1	1	1	1	1	1	1	1	1	-	-	1	1	1	1	1	1	1	-	1	1	-	-	1	0	1	-
4269470	TGCAGCCGTAGAATGCCGCCCTGTCTCCCATGACTCTCACCGCGATGGCCGAGATCGGAAGAGCGGTTC	1	-	1	1	1	1	1	1	1	1	1	1	1	1	1	1	1	1	1	1	1	1	1	1	1	1	1	1	1	1	1	1	1	1	1	1	1	1	1	1	1	1	1	1	1	1	1	-
4294104	TGCAGGGGAAACTGCTTGAGAAAGATGAAGCTCTGAGGTCCGCAGAGAACTTGATTGGCCGAGATCGGA	-	1	1	1	1	1	1	1	1	1	-	1	1	1	1	1	1	1	-	1	1	1	-	1	1	1	-	1	1	1	1	-	1	-	1	1	1	1	1	1	1	1	1	-	1	1	1	1
4303702	TGCAGCGGTGCATGCAACAACGAAGCGGGCAGCAACTGCACCGAGATCGGAAGAGCGGTTCAGCAGGAA	1	1	1	1	1	1	1	1	1	1	1	1	1	-	1	1	1	1	1	1	1	1	1	1	1	1	1	1	-	1	1	1	1	1	1	1	1	1	1	1	1	1	1	1	1	1	1	1
4297860	TGCAGGCTCAGCTCTGTGACGCCGCCGTCGGCATTGCAGGACACGCCGAGATCGGAAGAGCGGTTCAGC	1	1	1	0	-	1	1	1	1	-	1	1	1	1	1	1	1	1	1	1	1	1	1	1	1	1	1	1	1	1	-	1	1	1	1	1	1	1	1	1	1	1	1	1	1	1	1	1
4274526	TGCAGCCTCAGGAGGACGCCGAGCAGGTCCTCGTCTCTCTCGGCCGTGGCCGCGCCGAGATCGGAAGAG	1	1	1	1	1	1	1	1	1	1	1	1	1	1	1	1	1	1	1	-	1	1	1	-	1	1	1	1	1	1	1	1	1	1	1	1	1	-	1	1	1	1	1	1	1	1	1	1
4267995	TGCAGGAACATGAGCTTCCGCGATGCCAGGAACGCGTTGTTCCGAGATCGGAAGAGCGGTTCAGCAGGA	1	1	1	-	1	1	1	-	1	1	1	1	-	-	1	1	1	1	1	1	-	1	1	1	1	1	1	1	-	1	-	1	1	1	1	-	-	1	1	1	1	1	1	-	-	1	1	1
4267379	TGCAGCTGCGAGCTCAGGTCCTCGATCTTGGCCTCCCCGAAGATCACGTACGTCTCCGACGTCGGGCTC	1	-	1	1	1	1	1	1	1	1	1	1	1	1	1	1	1	1	1	1	1	1	1	-	1	1	1	1	1	1	1	1	1	-	1	-	1	1	1	1	1	1	1	1	1	-	0	1
4328373	TGCAGGTGTGCGTTTTGGCTGTACAATGTTGTCAGGAATAGGAAGGCCCGAGATCGGAAGAGCGGTTCA	1	-	1	1	1	1	1	-	1	1	-	-	1	1	1	-	1	1	1	-	1	1	1	1	1	1	1	-	-	1	1	-	1	1	1	1	1	-	1	1	1	1	1	1	1	0	1	1
4300098	TGCAGCTCTACAACAACAGCCTGAGCGGAGAGGTCCCTGCCGAGATCGGAAGAGCGGTTCAGCAGGAAT	1	-	1	1	1	-	1	1	1	1	-	1	1	1	1	1	1	1	1	-	1	1	1	1	1	1	1	1	-	-	1	1	1	1	1	0	1	1	1	1	1	1	1	1	1	1	1	-
4299708	TGCAGGCAGCAGCTCAATTCTGTGAGGTGCAGGTTCAAATGCACGAGGCTGTGGCTGAAAGGGGACAAG	1	-	1	1	-	1	1	1	1	1	1	1	1	-	1	1	1	0	-	1	1	1	1	1	-	1	1	1	1	1	1	1	1	1	1	1	1	1	1	1	-	1	1	1	1	-	1	1
4327593	TGCAGCACCGTCGAGTCGTCGGTCGCAACACCAGACGCCGAGATCGGAAGAGCGGTTCAGCAGGAATGC	-	1	1	-	1	1	1	-	1	1	-	1	1	1	1	1	1	-	-	0	1	1	1	-	1	1	1	1	1	-	-	1	1	1	1	1	1	1	1	1	1	1	1	1	1	1	1	1
4296806	TGCAGGCCGCGCCCGACGGGTACAAGGTGGGCAGCTCCGAGATCGGAAGAGCGGTTCAGCAGGAATGCC	1	-	1	1	1	1	1	1	1	1	1	1	1	-	1	1	1	1	1	0	1	1	1	1	1	1	1	1	1	1	1	1	1	1	1	1	1	1	1	1	-	1	1	1	1	1	1	1
4297926	TGCAGAGCACCCACGAAGAGGGGCGGAATGCTCTGGGCATTGCGGAACACGTTCTCCGAGATCGGAAGA	1	-	1	1	-	-	1	1	1	1	1	1	1	1	1	1	1	1	1	1	1	1	1	1	-	1	-	1	1	-	1	1	1	1	1	1	1	1	1	1	1	1	1	-	1	1	1	1
4280616	TGCAGCGTCCGCTATTTCTGCCCTGCCGGGATGCGCCTCGACATTCCGAGATCGGAAGAGCGGTTCAGC	1	-	1	1	1	1	-	1	1	1	1	1	1	1	1	1	1	1	1	1	1	1	1	1	1	-	1	1	1	1	1	1	1	1	1	1	1	1	1	1	1	1	1	1	1	-	-	1
4295234	TGCAGATGCTGCGGGACGAGCTGGAGCTGGCCATGGCGCTCAGCGGGTGCCCGTCGCTCCGAGATCGGA	1	1	1	1	1	1	1	1	1	1	1	1	-	1	1	1	1	1	-	1	1	1	1	1	1	-	-	1	1	1	1	1	1	1	1	-	1	1	1	1	1	1	-	1	-	1	1	1
4290347	TGCAGCTTGCCGCCGCAGTCGCCCGTCTGGCACCGCCCGTTGCCGAGATCGGAAGAGCGGTTCAGCAGG	1	1	1	1	1	1	1	1	1	-	0	1	1	1	1	1	1	1	1	1	1	1	1	1	1	1	1	1	1	1	1	1	1	1	1	1	1	1	1	1	1	1	1	1	1	1	1	1
4328911	TGCAGGCAGCAACGTGCAGTGCCCCGAGACCCTCCAGCAACCCGAGATCGGAAGAGCGGTTCAGCAGGA	1	1	1	1	1	1	1	1	1	1	-	1	1	1	1	1	1	1	1	-	1	1	1	1	1	1	1	1	1	1	1	1	1	1	1	1	1	-	1	1	1	1	-	1	1	1	1	1
4327724	TGCAGCAGCGTGGTGTTCGTGGGCAACATCCCGTACCAGGCGAGCGAGAGGGAGCTCCGAGATCGGAAG	1	1	1	1	1	1	1	1	1	1	1	0	1	1	1	1	1	1	1	1	1	1	1	1	1	1	1	1	1	1	1	1	1	1	-	1	1	1	1	1	1	1	1	-	1	1	1	1
4280810	TGCAGGAGAGGGAGTGCTGGAAGAGGCCTCCTTGCCACCACGAGCATCCGAGATCGGAAGAGCGGTTCA	1	1	1	1	1	1	1	1	1	1	1	1	1	1	1	1	1	1	1	1	1	-	-	1	1	1	1	1	1	1	1	-	1	1	-	0	1	1	-	1	1	1	1	1	1	1	1	1
4285309	TGCAGACCGTAACAAAAACGCGAGGACGTAGGCCGGCATCCTACGACACGGCTCCGAGATCGGAAGAGC	1	-	1	1	-	1	1	-	1	1	1	-	1	1	-	1	1	1	-	1	1	-	1	-	1	-	1	1	1	1	-	1	1	1	1	1	1	1	1	1	1	1	1	1	1	1	1	1
4294173	TGCAGTGCAGCACAAGCGACACTGCAAACCGCAGATCTCGCCGAGATCGGAAGAGCGGTTCAGCAGGAA	1	1	1	1	1	1	1	0	1	1	1	1	1	1	1	1	1	1	1	1	-	1	1	1	-	1	1	1	1	1	1	1	1	1	1	1	1	1	1	1	1	1	1	1	1	1	1	1
4292819	TGCAGCCCTTGGTGGTTTCGACGGTGCACAGGGTGTCGAGGGCATCGTCGCTCCGAGATCGGAAGAGCG	1	-	1	-	1	1	-	1	1	1	1	1	1	-	1	1	1	1	1	0	1	1	1	1	1	-	1	1	1	1	1	-	1	1	1	1	1	1	1	1	1	1	1	1	-	1	1	1
4284178	TGCAGCAGCTGCGCCCCGTCCTTCTTGGGCGTGTTCACCCCGAGATCGGAAGAGCGGTTCAGCAGGAAT	1	-	1	1	1	1	1	1	1	1	1	1	1	1	1	1	1	1	1	1	1	1	1	1	1	1	1	1	1	1	-	1	1	1	-	-	1	1	1	1	1	1	1	1	1	0	1	1
4264830	TGCAGAAAGGAGTAAAAGGCCGAGCGCTAGCTGCCCTGGCCCCTCGCCTCGCCGAGATCGGAAGAGCGG	1	1	1	1	1	1	1	1	1	1	1	1	1	1	1	1	1	1	1	1	1	1	1	1	1	1	1	1	1	1	1	-	1	1	1	1	1	1	1	1	1	1	1	1	1	1	1	-
4263555	TGCAGCACCGCCTCAAGCCCACCGCCGTGCTCTGGGGCTGGCCGGCGACGCCGCGCCCGAGATCGGAAG	-	1	1	1	1	1	1	1	-	1	1	1	1	1	1	1	1	1	1	1	1	1	1	1	1	1	1	1	1	1	-	1	1	1	1	1	1	1	1	1	1	1	1	1	1	0	1	-
4290981	TGCAGCCGCTGGTCGAACATCTCGGACTTGCCCAGCTCGGTCTTGAAATCGGCGGAGCCGAGATCGGAA	1	1	1	1	-	1	1	1	1	1	1	1	1	1	1	1	1	1	-	1	1	1	1	1	1	1	1	1	1	1	1	1	1	1	1	1	1	1	1	1	1	1	-	1	1	-	-	1
4277905	TGCAGCCAGCTGAGGTCGCTGCCGGTGTCGACGTCCAGGAAGTAGGGCTTCGCCGAGATCGGAAGAGCG	-	1	1	1	1	1	-	1	1	1	1	1	1	1	1	1	1	1	1	1	1	1	1	1	-	1	1	1	1	1	1	1	-	1	1	1	1	1	1	1	1	1	1	1	1	1	1	-
4276809	TGCAGGTATTCCTGTGCGGCGGACGGCTTATACTCGGGCCGAGATCGGAAGAGCGGTTCAGCAGGAATC	1	-	1	1	-	1	1	1	-	1	-	1	1	1	1	1	-	1	1	1	1	1	1	1	1	-	1	1	1	1	-	1	1	1	1	1	1	-	-	1	1	-	-	1	1	1	1	0
4323748	TGCAGCCCTGATCGGATCCAGCTTGGTCGCTTTCCCCAAAGCTCATGATTCCAGGACCGAGATCGGAAG	-	-	1	1	1	1	1	1	1	1	1	1	1	1	1	1	1	1	1	1	1	1	1	1	1	1	1	1	1	1	1	1	1	1	1	1	1	1	1	1	1	1	1	1	1	1	1	1
4295244	TGCAGGTGTACTGGTGGGCGCTGCGCGCGTTGCGGTCGAGGAAGCCGAGCGCGTGACCGAGATCGGAAG	1	1	1	1	1	1	1	1	1	1	1	1	1	1	1	1	1	1	1	-	1	1	1	1	1	1	1	1	1	1	1	1	1	1	1	1	1	1	1	1	1	1	1	1	1	0	1	1
4268753	TGCAGGTGCTGATGCGGCACTTTGCGACGTGCCCGAAAAAGATGGCGCCCGAGATCGGAAGAGCGGTTC	1	1	1	1	1	1	1	1	1	1	1	1	1	1	1	1	1	1	1	1	1	1	1	1	1	1	1	1	1	1	-	1	1	1	1	1	1	1	1	1	1	1	1	1	1	0	1	1
4296057	TGCAGCATTATGTCCGCGATCTCTTTGACTTCCAGCTTGGTCAACTGTCTGAAGACGATCATCTCGTCC	1	1	1	1	-	1	1	1	1	1	1	1	1	1	1	1	1	1	1	1	1	1	1	-	1	1	1	1	1	1	1	1	1	1	1	1	1	1	1	1	1	1	1	1	1	-	1	1
4304180	TGCAGCCGTGGACGGAGACACCCCAAACCCTAGCATGGGGACCGAGCCGCCATGGTGAGGCACTGCACC	1	1	1	1	1	1	1	1	-	1	1	1	1	1	1	1	1	1	1	1	1	-	1	1	1	1	1	-	1	1	1	1	1	1	1	1	1	-	1	-	1	1	1	0	1	1	1	1
4296908	TGCAGCTTCTTGATGTCCTTCTTGAGCAGCCAGTAGTCGACGAAGGCCTCCTTCCACTCCGAGATCGGA	1	1	1	1	1	1	1	1	1	1	1	-	1	1	1	1	1	1	1	1	1	1	1	1	1	1	1	-	1	1	1	1	1	1	1	1	1	-	1	1	1	1	1	1	1	1	-	1
4304506	TGCAGCCGCTGTTCAAGCGGTCGGTGGCGTTCGTGAAGCGCGACGATTCAGACCTGGCGGACCAAGTGG	1	-	1	1	1	1	1	1	1	1	1	-	1	1	1	1	1	1	1	1	1	1	1	1	1	1	1	1	1	-	1	1	1	-	1	1	1	-	1	1	1	1	1	1	1	0	1	1
4287623	TGCAGTGCAAGGCGCTGGAGCTGTGCTTCAACGTCGCCCTCAACCGACTGCCGAGATCGGAAGAGCGGT	1	1	1	1	1	1	1	1	1	1	1	1	1	1	1	1	1	1	1	1	1	1	1	1	1	1	1	1	1	1	1	1	1	1	1	1	1	1	1	-	1	1	1	1	1	1	1	1
4295071	TGCAGATGTGGAGGAGTTCTTCCGGCAATGCGACCCGAGATCGGAAGAGCGGTTCAGCAGGAATGCCGA	1	1	1	1	-	-	1	-	1	1	1	1	1	1	1	1	1	1	1	1	1	1	1	1	1	1	1	1	1	1	1	1	-	1	1	1	1	1	1	1	1	1	1	1	1	1	-	1
4289121	TGCAGCAGTGAGGTTGGTATCTGCCCATGGAGCTGGTTGGAGGACAGGTTCAGCCGCTCCAGCTTCACG	1	1	1	1	1	1	1	1	1	1	1	1	1	1	1	1	1	1	1	-	1	1	-	-	1	1	-	1	1	1	1	1	1	1	1	1	1	-	1	1	1	1	1	1	1	1	-	1
4299905	TGCAGCGGCGATTTCCGGCGGTCACCTCGTCCTCTCCACCCCTACCTCCACCCGAGATCGGAAGAGCGG	1	-	1	1	1	1	-	1	-	-	1	1	1	1	1	1	-	1	1	1	1	1	1	1	-	1	1	1	1	1	1	1	1	-	1	1	-	1	1	1	1	1	1	-	1	-	1	1
4269152	TGCAGGAGGTGCGCGCTTTTGCTTTTGCGTCGCTCGCCTTTCCTCTGTCGCCGAGATCGGAAGAGCGGT	1	-	1	1	1	1	-	1	1	1	1	1	1	1	1	-	1	1	1	1	1	1	1	1	1	1	1	1	1	-	1	1	1	1	1	1	1	1	-	1	1	1	1	1	1	1	1	-
4266881	TGCAGTGCGCGCTCAGCCTCATGCCGTCGAACGCCGCCGCGCCGCAGCTCGACTGCCTCAACATGCTCA	1	1	1	1	1	1	1	1	1	1	1	1	1	1	1	1	1	1	1	1	1	1	1	1	-	1	1	1	1	1	-	1	1	1	-	-	1	1	1	1	1	1	1	1	1	1	1	1
4278454	TGCAGCCGTCGCTCTCCACGGCGAGCTTGCACGCGAACTGCGGCGCGCCCGAGATCGGAAGAGCGGTTC	1	1	1	1	1	1	1	1	0	-	1	1	1	1	-	1	1	1	1	1	1	1	1	1	1	1	1	1	1	1	1	1	1	1	1	1	1	1	1	1	1	1	1	1	1	1	1	1
4275197	TGCAGACGCACATTCGAGAGGCTCAGCTCTGTCATCCGCCGAGATCGGAAGAGCGGTTCAGCAGGAATG	1	-	1	1	1	-	1	1	1	1	1	1	1	1	1	1	1	1	-	1	1	1	1	1	1	1	1	1	1	1	1	1	1	1	1	1	1	1	1	1	1	1	1	1	1	1	1	1
4299360	TGCAGGGCCTCGACGCGCAGAAGGCCAACATCGCCGCCGAGATCGGAAGAGCGGTTCAGCAGGAATGCC	1	1	1	1	1	1	1	1	1	1	1	1	1	1	1	1	1	1	1	1	-	1	1	1	-	1	1	1	1	-	1	1	1	1	1	1	1	1	1	1	1	1	-	1	1	1	1	0
4295404	TGCAGCGACATCTATGCGAGCTGGACAAATCCTCTGGCGATGGTGCCGTTGGCGCCCCGAGATCGGAAG	-	1	-	-	1	1	1	1	1	1	1	1	1	1	1	1	1	1	1	1	1	1	1	1	1	1	1	1	1	-	-	1	1	1	1	1	1	-	1	-	1	1	-	1	1	0	-	1
4278574	TGCAGAAGGGACAGCGCCGCGCATTCCACGGCAGCTTCCCTGACGTCAGTTTCCACTTTCCGAGATCGG	-	1	1	1	1	1	1	1	1	1	1	-	1	1	1	1	1	1	1	1	1	1	1	1	1	1	1	1	1	1	1	1	1	1	1	-	1	1	1	1	1	1	1	1	1	1	1	1
4289574	TGCAGGTGAAGTCCGACCTCATCGATCCTCAAGGCATCCTCTCCGAGATCGGAAGAGCGGTTCAGCAGG	-	1	1	1	1	1	1	1	1	1	1	1	1	1	1	1	1	1	0	-	1	1	1	1	1	1	1	1	1	1	1	1	1	1	1	1	-	1	1	1	1	1	-	1	1	-	1	1
4290753	TGCAGTTGCGGTTCGATTCGAGGCTTCGTAAGATCATAATCATGACCATCATCCCAACTCTTAAAGAAA	1	-	1	1	-	1	1	1	1	1	1	1	1	1	1	-	1	1	1	1	1	1	1	1	1	-	1	1	1	1	1	-	1	1	1	-	1	-	1	1	1	1	1	1	-	1	1	-
4269419	TGCAGCGTGAGCAGCAGCAGCAAGGCGAGGAAGGAGGCCGAGATCGGAAGAGCGGTTCAGCAGGAATGC	1	1	1	1	1	1	1	-	1	1	1	1	1	1	1	1	1	1	1	1	1	1	1	1	1	1	1	1	1	1	1	1	1	1	1	1	1	1	1	1	1	1	1	1	1	1	1	1
4266255	TGCAGCAAAGCAATGCCGATGCCAATGCCAATGCAGGCACCCGAGATCGGAAGAGCGGTTCAGCAGGAA	1	-	1	1	-	1	1	1	1	1	1	1	1	1	1	1	-	1	-	0	1	-	1	1	1	1	1	1	1	1	1	1	1	1	1	1	1	1	1	1	1	1	1	1	1	1	1	1
4292007	TGCAGAGTAAAAACGACAAGGGAGACAAGCTTTCCTGTGCTGTATACACTTGGAAAATGTCCGAGATCG	1	-	1	1	-	1	1	1	1	1	1	-	1	1	1	1	1	1	1	1	1	1	1	-	1	1	1	1	1	1	1	1	1	1	1	1	1	1	1	1	1	1	1	1	1	-	0	1
4291935	TGCAGGTTCGAGGGGTACCAGGACACCCTGTACGTGCACGCCAACCGAGATCGGAAGAGCGGTTCAGCA	1	1	1	1	1	1	1	1	1	1	1	1	1	1	1	1	-	1	1	1	1	1	1	1	-	1	1	1	1	1	1	1	1	1	1	1	1	1	1	1	1	-	1	1	-	1	1	1
4328185	TGCAGCTCCGCCGCCGACGCCGTCAACACCCGCTCCATCAACGCCTGCAACGTCCTCGCCCTCTCCGAG	1	1	1	1	1	1	1	1	-	-	1	1	1	1	1	1	1	1	1	1	1	1	1	1	1	1	-	1	1	1	1	1	1	1	1	-	1	1	1	1	1	1	1	1	1	1	1	1
4297437	TGCAGTGCATTGTAATCAGGGCTTGGCCAGTATATGCTTGTGATGTCCGAGATCGGAAGAGCGGTTCAG	1	1	1	1	1	1	1	1	1	1	1	1	1	1	1	1	1	1	0	-	1	1	-	1	-	1	1	1	1	1	1	1	1	1	1	1	1	-	-	1	1	1	-	1	1	1	1	1
4318448	TGCAGGATCGCCGAGAAAGACAAGTGCACGGCCGACTGCGCCGAGATCGGAAGAGCGGTTCAGCAGGAA	1	1	1	1	1	1	1	-	1	1	1	1	1	1	1	1	1	1	1	1	1	1	1	1	1	1	1	1	1	1	0	1	1	1	1	1	1	1	1	-	1	1	1	1	1	-	1	1
4325717	TGCAGCCACGTGGCGAGCTGGCACCAGAGCAGGAACCGAGATCGGAAGAGCGGTTCAGCAGGAATGCCG	1	1	1	1	1	1	1	1	1	-	1	1	1	1	1	1	1	1	1	1	1	1	1	1	1	1	1	1	1	1	1	1	1	1	1	1	1	1	1	1	1	1	1	1	1	1	1	1
4274961	TGCAGCTTCAGCCGAGGGGGTGCCGCGTGACGTGCTTGGCCGACGCGGGGGGAACCGAGATCGGAAGAG	1	-	1	-	1	1	-	1	1	1	1	1	1	-	1	1	-	1	1	1	1	1	1	-	1	-	1	1	1	1	1	1	-	1	-	1	1	1	1	1	1	-	1	1	1	1	1	1
4265238	TGCAGTAGTAGGATGTTGCCGCCGGCCAGGTGCGCGTTTGCCAAGTCCGCTGGCGCCGAGATCGGAAGA	1	1	1	1	1	1	1	1	-	1	1	1	1	1	1	1	1	1	1	0	1	1	1	1	1	1	1	-	1	1	1	1	1	1	1	1	1	1	1	1	1	1	1	1	1	-	1	1
4302728	TGCAGCCCTGAACAACGAGGAGAAAGATCGATACGCTTCAGATCCGCGATCTAGAATTCGAGATGGATG	-	1	1	1	-	1	1	1	1	1	1	1	1	1	1	1	1	1	1	1	1	1	1	1	1	1	1	1	1	1	-	1	1	1	1	1	1	1	1	1	1	1	1	1	1	-	1	-
4275678	TGCAGGCGGAGGCGCTTGGCGCCGAGCCCGCCCATGGACCAGTGCGCTTCGCGCGCCCAGCAGAGGAGC	-	1	1	1	1	1	1	1	1	1	1	1	1	-	1	1	1	1	1	-	1	1	1	1	1	1	1	-	1	1	1	1	1	1	1	1	1	-	1	1	1	-	1	1	1	1	1	1
4300735	TGCAGGCCATGATGGACTTCTACCACGACCTGGTGCCGAGATCGGAAGAGCGGTTCAGCAGGAATGCCG	1	1	1	1	-	1	-	1	1	1	1	1	1	1	1	1	1	-	1	1	1	-	1	1	1	1	1	-	1	1	1	1	1	1	1	1	1	-	1	1	1	-	1	1	1	0	1	1
4268027	TGCAGATCCAGGGCGCGATGAGGGTGGTCGAGGCCACCAACGACGACAGGGAGCTGAGGATATACATGT	1	1	1	1	-	1	-	1	1	1	1	-	1	1	1	1	1	1	-	1	1	1	1	1	1	1	1	1	1	1	-	1	1	1	1	1	-	1	1	1	1	1	1	1	1	1	-	1
4295055	TGCAGCATGCCCTCCTTGGCCGCCTCGGCGATGAACTGCTTCTCGAAGTCGGCCCCCTTGGCCAGCGTG	1	1	1	1	1	1	1	1	1	1	-	-	1	1	1	1	1	1	-	1	1	1	1	-	1	1	1	-	1	1	1	1	1	1	1	1	1	1	1	1	1	1	1	1	-	-	1	1
4285483	TGCAGTCCTTCCTCGCCGCCTTGCCGCACGAGCGCGATCTGGGCTGGAACTCGCCGTCCGCGCCCTCAG	1	-	-	1	1	1	1	1	1	1	1	1	1	1	1	1	1	1	1	1	1	1	1	1	1	1	1	1	1	1	1	1	1	1	1	1	1	1	1	1	1	1	1	-	1	-	0	1
4328976	TGCAGTTCGACAGGTACAGATACGTCAGGTTCTTGAGGTTCCCAATGCTCGGAGGCATCTCCCCTTGGT	1	-	1	1	1	1	1	0	-	1	1	-	1	1	1	1	1	1	1	1	1	1	1	1	1	-	1	-	1	1	1	-	-	1	1	-	1	-	1	1	1	1	-	1	1	1	1	1
4273296	TGCAGGTACGCCGACGGGGTCGTCTTGGATCCAGAGCCAGCCGAGATCGGAAGAGCGGTTCAGCAGGAA	1	-	1	1	1	1	1	-	1	1	-	1	1	1	1	1	1	1	1	-	-	1	1	-	1	1	1	1	-	1	1	1	1	1	1	1	1	1	1	1	1	1	1	1	1	1	1	1
4288491	TGCAGGAGTTGCAGCTCAGCGGGAACAAGATCTCCGGCACGGTGCCGCCGAGATCGGAAGAGCGGTTCA	1	1	1	1	1	1	1	1	-	1	1	1	1	-	1	1	1	1	1	1	-	1	1	1	1	1	1	1	1	-	1	1	1	1	1	-	1	-	1	1	1	1	1	-	1	1	1	1
4292902	TGCAGTCCAACATCTTCATCGAGGGCGTCTCCCACAAGATCCGCCGGCAGATCGAGGACCTGGAGCGCG	-	1	-	1	1	1	1	1	-	1	1	1	1	1	1	1	1	1	1	1	1	1	1	1	1	-	-	1	1	1	-	-	1	1	1	1	1	1	1	1	1	1	1	1	1	-	1	1
4292906	TGCAGGAAGTCGTAGAGCTTCACCTGGTTCCACGCCACCTCCATCCCCTGGTACTCGTCGAACGCCCGA	1	1	1	1	0	1	1	1	1	1	-	1	1	1	1	1	1	1	1	1	1	1	1	1	1	1	1	1	1	1	1	1	1	1	-	1	1	1	1	1	1	1	1	1	1	1	1	1
4286244	TGCAGCCGGCGCTTGACGGTGTGCGCGTTGTCGCCGCGGTCCAGGTCCATGCCCAGCACGCACCCGAGA	1	1	1	1	1	-	1	1	-	1	1	-	1	1	1	1	1	-	-	1	1	1	1	1	1	1	1	1	1	-	1	1	-	1	-	1	1	1	-	1	1	1	1	1	1	1	1	1
4302530	TGCAGCTCACGCCTGGTGGCGTGCTTTCGCTCCAGGACCCTGCCGAGATCGGAAGAGCGGTTCAGCAGG	-	1	1	1	1	1	1	1	-	1	1	-	1	1	1	1	1	1	1	1	1	1	-	-	1	1	1	1	1	-	1	1	1	1	1	-	1	1	1	1	1	1	1	1	1	1	0	1
4278347	TGCAGGATCAAAAGCCAAACGAGCGATGACGCGGTGGCCGTCTGCCACCGAGATCGGAAGAGCGGTTCA	1	1	1	1	1	1	1	1	1	1	1	1	1	1	1	1	1	1	1	1	1	1	1	1	1	1	1	1	1	1	1	1	1	1	1	1	1	1	1	-	1	1	1	1	1	-	-	1
4263816	TGCAGCAGGACGGTGACGAAGGTGAAGAAGAAGCAGGTGACCAGGGCTTCCACGGCCGAGATCGGAAGA	-	1	1	1	1	1	1	1	1	1	1	1	1	1	1	1	1	1	1	1	1	1	1	1	-	1	1	1	1	1	1	1	1	1	-	1	1	1	-	1	-	1	1	1	1	1	-	1
4277501	TGCAGGCCGCCGTACAGCTGCGTGAGGTGGACGGGGATTTCCTGCACGTCCATCGGTACGCCGAGATCG	1	1	1	1	1	1	1	1	1	-	1	1	-	1	1	1	1	1	1	-	1	1	1	1	-	1	1	1	1	1	-	1	1	-	-	1	1	1	1	1	1	1	-	1	1	-	1	1
4293038	TGCAGGTGGCGAGCTTGGAGCTGGTGTCTTCGGTGGTGAGCGCCGCGCGGTCCAAGAACCTGAAGCCTT	1	-	1	1	1	1	1	1	1	1	1	1	1	1	1	1	1	1	0	1	1	1	1	-	1	1	1	-	1	1	1	1	1	1	-	-	1	1	1	1	1	1	-	1	1	1	1	1
4282168	TGCAGCTGCTCTATCCCCTTGCCGTGCCACAGTATCCGAGATCGGAAGAGCGGTTCAGCAGGAATGCCG	1	1	1	1	1	1	-	1	1	1	1	1	-	-	1	1	1	-	0	1	1	1	1	1	1	1	1	1	1	1	1	1	-	1	1	1	1	1	1	1	1	1	1	1	1	1	1	-
4270191	TGCAGCCGCAGAAGCACCAGCCGTACGACTACTTCTACTACGACGGGCCGAGATCGGAAGAGCGGTTCA	1	1	1	1	1	1	1	1	1	1	1	1	1	1	1	1	1	1	1	1	1	1	1	1	1	1	1	1	1	-	-	1	1	1	1	1	1	-	1	1	1	1	-	1	1	1	1	1
4287329	TGCAGCAGCCGCCCCACCACCTGCTTCCGCCACCGCGTCACGCCGCCCCGCCGAGATCGGAAGAGCGGT	1	1	1	1	1	1	1	1	1	1	1	-	1	1	1	1	1	-	1	1	1	-	1	1	1	1	1	1	1	1	1	1	-	1	1	1	1	-	1	1	1	1	1	-	1	1	1	1
4326147	TGCAGCTGCGTCTTGACAACGTCGAGTGGTGTGGTCAAGGCGGCTGCTAGAGCACCGAGATCGGAAGAG	1	1	-	1	-	1	1	1	1	1	-	1	1	1	1	1	1	1	-	-	1	1	1	-	1	1	1	1	1	1	1	1	1	1	1	1	1	-	1	1	1	1	1	1	1	-	1	1
4268432	TGCAGGACGCGACACGCGTGAGTTAATACACATCGAGTCAAACATCACCGAGATCGGAAGAGCGGTTCA	-	-	1	1	1	1	1	1	1	1	1	1	1	1	1	1	1	1	-	1	1	1	1	1	1	1	1	1	-	1	1	1	1	1	1	-	1	-	1	1	1	1	1	1	1	-	-	1
4299040	TGCAGCTTCTTCACCTCCTCGATGGTGAAGTCCGGCACCGCCTGATCTGGCGCCGAGATCGGAAGAGCG	1	-	-	1	1	1	-	1	1	1	1	1	1	1	1	1	1	-	1	1	1	1	1	1	1	1	1	1	1	1	1	1	1	1	1	1	1	1	-	-	1	1	1	-	1	-	1	1
4266310	TGCAGCAGAGGGCCGAACACCAGCGAGGGACACACGGTCACCACGCTTAGCCCGAGATCGGAAGAGCGG	1	1	1	1	1	1	1	1	1	1	1	1	1	1	1	1	-	1	1	1	1	1	1	-	-	1	1	1	1	1	1	1	1	1	1	1	1	1	1	1	1	1	1	1	-	-	1	1
4297040	TGCAGCGGTACCCCCCAAATCAGGAACCCGCCGCCATTAATAACCAGAGCATCAAGCACCGAGATCGGA	1	1	1	1	1	1	1	1	1	1	1	-	1	1	1	1	1	1	1	1	1	1	1	1	1	1	1	1	1	1	1	1	1	1	-	1	1	1	1	1	1	1	1	1	1	0	1	1
4269607	TGCAGCGCCGCGATGCGGAAGATCATCTCCCGCATGGCCGCCGAGATCGGAAGAGCGGTTCAGCAGGAA	1	-	1	1	1	-	1	1	-	-	1	1	1	1	1	1	1	1	1	1	1	1	1	1	1	1	1	1	1	1	1	1	-	1	1	1	1	1	1	1	1	1	1	1	1	1	-	1
4302756	TGCAGCAGAGCCACCACGGCAAACTCCTTCTCCCTCGCAGGGCCGTCCTCGATGGTCTCAACCAGTGCG	1	1	1	1	1	1	1	1	1	1	1	1	1	1	1	1	1	1	-	1	1	1	1	1	1	1	1	1	1	1	-	1	1	1	1	1	1	-	1	1	1	1	1	1	1	0	1	1
4304952	TGCAGTCGGAGCTGATGGCGCTGATGATGGGCGGCGACCCCGAGATCGGAAGAGCGGTTCAGCAGGAAT	1	-	1	1	-	1	-	1	1	1	1	1	1	1	1	1	1	1	0	-	1	-	1	1	1	1	1	-	1	1	-	1	1	1	1	1	1	1	1	1	1	1	1	1	1	-	1	-
4301478	TGCAGGCCCTGGACGCTCTCGGCGTTGAGCCTCTTGACGGCGACGACGACGCCGAGATCGGAAGAGCGG	1	1	1	1	1	1	1	1	1	1	1	1	1	1	1	1	1	1	1	1	1	1	1	-	1	1	1	-	1	1	1	1	1	1	1	-	1	1	1	1	1	1	1	1	1	-	1	1
4299071	TGCAGCCAACGAAGTGGTGCGCCGTCTTGGACGCCCAGAGCTCCTCCCCCAGCCTGCTCCCGCCACTCT	1	1	1	1	1	1	1	1	1	1	1	1	1	1	1	1	1	1	1	1	1	1	1	-	1	1	1	1	1	1	1	1	1	1	1	1	1	1	1	1	1	1	1	1	1	1	1	-
4276382	TGCAGTCCGTCCTCGCCGCCCGCCGCCCACCTTCGCCCGAGGACGCCGAGATCGGAAGAGCGGTTCAGC	-	1	-	-	1	1	-	1	1	1	1	1	1	-	-	1	1	1	-	-	1	1	1	1	1	1	-	1	1	1	1	1	1	1	1	1	1	1	-	1	1	-	1	1	1	1	0	-
4269814	TGCAGGTGTATCACCCGAACATCAACTCCAACGGCAGCATCTGCCTGGACATCCTCAAGGAGCAGTGGA	1	-	1	1	1	1	1	1	1	1	1	-	-	1	1	1	1	1	1	1	1	1	1	1	1	1	-	1	1	1	1	1	1	1	1	1	1	-	1	1	1	1	1	1	1	1	1	1
4279794	TGCAGATCAACTACACCTTCGACATACGCCGGGAGTGGCCGTCGTCAAGCTGAGCCTTCGTCCAGTCCG	1	1	1	1	1	1	1	1	1	1	1	1	1	1	1	1	-	1	1	1	1	1	1	1	1	1	1	1	1	1	1	1	1	1	1	0	1	1	1	1	-	1	1	1	1	1	1	1
4273473	TGCAGCTAGCACAGCGCTGGCTGGCAGATGGATGTGAAGGGATTTCCAGTCGCGTCGCATCGCGTCAAA	1	1	1	1	1	1	1	1	1	1	1	-	1	1	1	1	1	1	1	0	1	1	1	1	1	1	1	1	1	1	-	-	1	1	1	1	1	-	1	1	1	1	-	1	1	1	-	1
4297946	TGCAGCCGACCCTGGCCACCGAGTACGCCAGCCAGGCCGAGATCGGAAGAGCGGTTCAGCAGGAATGCC	1	1	1	-	1	1	1	1	-	-	1	1	1	-	-	1	1	1	1	1	1	1	1	1	1	1	1	1	1	1	1	1	-	1	1	1	1	1	1	1	1	1	1	1	1	1	1	1
4268382	TGCAGTTAGCTGTAATTGAGCTTGCTTACTTTGCTGTCTTTCTGCTCCGAGATCGGAAGAGCGGTTCAG	1	-	1	1	1	1	1	1	1	1	1	-	-	1	1	1	-	1	1	1	1	-	1	-	1	1	1	-	1	1	1	-	1	1	-	1	1	-	1	1	1	1	1	1	1	1	1	-
4264565	TGCAGCGCCCAGCCGAACTGCACGCCGAGATTGGAAGAGCGGTTCAGCAGGAATGCCGAGACCGATCTC	1	1	1	-	1	1	1	1	-	1	1	1	1	1	-	1	1	1	1	1	1	-	1	1	1	1	1	1	1	-	1	1	1	1	1	1	1	1	1	1	1	1	1	-	1	1	1	1
4282665	TGCAGTTGTCGTAAGCCGTCTTGGTCACCTCCACCACGTTGTGCGCCGCAGCCGAGATCGGAAGAGCGG	1	1	1	1	1	-	1	1	1	1	1	1	1	1	1	1	1	1	1	-	1	1	1	1	1	1	1	1	1	1	1	1	1	1	1	1	1	1	1	-	1	1	1	1	1	1	1	1
4275480	TGCAGCATGGCCCCGGAGTTGTACCTCCACACCGCGCCCCACGACCGAGATCGGAAGAGCGGTTCAGCA	1	1	1	1	1	1	1	1	1	1	1	1	1	1	1	1	1	-	-	1	1	1	1	1	1	1	1	1	1	-	1	1	1	1	1	1	1	1	1	1	1	1	1	1	-	0	-	1
4301072	TGCAGGAGTCGTAGCCGGCCTTGCTCACCTCGACCACGTTGTGCGCCGAGATCGGAAGAGCGGTTCAGC	1	1	1	1	1	1	1	1	-	1	1	1	1	1	1	1	1	1	1	1	1	1	1	1	-	1	1	1	1	1	1	1	1	1	1	1	1	1	1	1	1	1	1	1	-	1	1	1
4286701	TGCAGGCCGTCCCAGAGCTGATCCCCTGTTTCCTGCCCGCCGTTCTGCTGCCACGACTGCGGGACCCGA	1	1	1	1	1	1	1	1	1	1	1	1	1	1	1	1	1	-	1	1	1	1	1	-	1	1	1	1	1	1	-	1	1	1	1	1	1	1	1	1	1	1	1	1	1	1	-	1
4268096	TGCAGCACCGCGGGGAGGAGGGCGCCGGGATCGTCGCCGCCGAGATCGGAAGAGCGGTTCAGCAGGAAT	-	1	1	1	1	1	1	1	1	1	1	1	1	-	-	1	1	1	1	1	1	1	1	1	-	1	-	-	1	1	1	1	1	1	1	1	1	-	1	1	1	1	1	1	1	1	1	1
4263174	TGCAGGCATCGTGCGGGACATCGTCGCCGCTGGTGTCAGGGCTGATGCCGAGATCGGAAGAGCGGTTCA	1	1	1	1	1	1	1	1	1	1	1	1	1	1	1	1	1	1	1	1	1	1	1	1	1	1	1	1	1	1	1	1	1	1	1	1	1	-	1	1	1	1	1	1	-	1	1	-
4279357	TGCAGAGCATCGGGAGGAACGACTGCGTCTGCACGAACGTCAGGCCGAGGCCGATGGACACGTTCATGG	1	-	1	1	-	1	1	1	1	1	1	1	1	1	1	1	1	1	0	1	1	1	1	1	1	1	1	-	1	1	1	1	1	1	1	1	-	1	1	1	1	-	1	1	1	1	1	-
4317870	TGCAGCACGCTCTTCTGGCCGTGCTCGTGCCCCTCCCCGCTCTCTCCTTCAGGATGGTACACATCCGAG	-	-	1	1	-	1	1	1	1	1	1	1	1	1	1	1	1	1	1	1	-	1	1	1	1	1	1	1	1	1	1	1	1	1	1	0	1	1	1	1	1	1	-	-	1	-	1	1
4300717	TGCAGGTATCGATTATGAGTACAAGGCGGTGAACCTCCTCAAGGGCGAGCAGTCTGATCCCGAGATCGG	1	1	1	1	1	1	1	1	1	1	-	-	1	1	1	1	1	1	-	1	1	1	1	-	1	1	1	1	1	1	-	1	1	1	1	-	1	-	1	1	1	1	1	1	1	-	1	1
4283076	TGCAGCAGATAAGATCTGGACTTAGACTCTTCCTCGAGCCGAGATCGGAAGAGCGGTTCAGCAGGAATG	-	-	1	1	1	1	1	1	1	-	1	1	1	-	1	1	1	1	1	1	1	1	1	1	1	1	1	1	1	1	0	-	-	1	1	1	1	1	-	-	1	1	1	1	1	1	1	1
4286802	TGCAGTAGGGCGTGTCCCCTCTGTACATGAAGACGTCGCGGTCGCGCGCCAGCTGCTTGGCGCAGAGCG	1	-	1	1	-	1	1	1	1	1	-	1	-	1	1	1	1	1	1	1	1	1	1	-	1	1	1	1	1	1	-	1	1	1	1	1	1	-	1	1	1	1	1	1	1	1	-	1
4280206	TGCAGTCCTGCACTGCACTGGGCGCCAAGCGGACAGCATACTGGCCGAGATCGGAAGAGCGGTTCAGCA	1	1	1	1	-	-	1	1	1	1	1	1	1	1	1	1	1	1	-	1	1	1	1	1	1	1	1	1	1	1	1	1	1	1	1	1	1	-	1	1	1	1	1	1	-	1	1	1
4293975	TGCAGCGGATTGCATTAGCAGCTGAACCCCCGCCAATATTCAGTGTCAGAAGCCGAGATCGGAAGAGCG	1	-	1	1	1	1	1	1	1	1	1	1	1	1	1	1	-	1	1	1	1	1	1	1	-	1	1	1	1	1	1	1	1	1	1	-	1	1	-	1	1	1	1	1	-	1	0	1
4270749	TGCAGTGCTGTGTCCTCTGTACTACTACTACCAGCGGCACCCGAGATCGGAAGAGCGGTTCAGCAGGAA	-	-	1	1	-	1	1	1	1	1	1	1	1	1	1	1	1	1	1	1	1	1	1	1	1	1	1	1	1	1	1	1	1	1	1	1	1	1	1	-	1	1	1	1	1	1	0	1
4286464	TGCAGCACGAGGTAGAAGAAGTCGTAGTCCGCCGCCTGCGCCGCGGCGCACCCGAGATCGGAAGAGCGG	1	1	1	1	-	1	-	-	1	1	1	-	1	1	-	1	1	1	1	1	1	1	1	-	1	1	1	1	1	-	1	1	1	1	1	1	1	1	1	1	1	1	1	1	-	1	-	1
4281560	TGCAGGTGTACACGATCGTCGCGGCCGGCACCGTGTACGTCAAGTACGAGAAGGAGCGGATCAGCGTCT	1	1	1	1	1	1	1	1	1	1	1	1	1	1	1	1	1	1	1	1	1	1	1	1	1	1	1	1	1	1	0	1	-	1	1	-	1	-	1	1	1	1	1	1	1	1	1	1
4285106	TGCAGAAGCTACGCATGGCATCAATCACCATGGTCCGCTAGTGGGCAATGGCCATCGATTAGCACTTGA	1	-	1	1	1	1	1	1	1	1	1	1	1	1	1	1	1	1	1	1	1	1	1	1	-	1	1	1	1	1	1	1	1	-	1	-	1	1	1	1	1	1	1	1	1	-	0	1
4274683	TGCAGCGGCAGAGCCGTATCGTGCTGATCGATGTGCAGGCCCGAGATCGGAAGAGCGGTTCAGCAGGAA	1	-	1	1	1	1	1	1	1	1	-	1	1	1	1	1	1	1	1	1	1	1	1	1	1	1	1	1	1	1	-	1	1	1	1	1	1	1	1	1	1	1	1	1	1	1	1	1
4272293	TGCAGACGCTGGGCATCGCCATCTTCTGCGTGAACCCGAGATCGGAAGAGCGGTTCAGCAGGAATGCCG	-	-	-	1	1	1	-	-	-	1	1	1	1	1	1	1	-	1	1	-	1	1	1	1	-	-	1	1	1	1	1	1	1	1	1	1	1	1	-	1	1	1	1	1	1	1	-	-
4325227	TGCAGCTTCCAGCCATATTCGTCCCTTCACTGACGACGCCGAGATCGGAAGAGCGGTTCAGCAGGAATG	1	-	1	1	1	1	1	1	1	1	-	-	1	1	1	1	1	1	1	1	1	1	1	1	1	1	1	1	1	1	1	1	1	1	1	1	1	1	1	-	1	1	1	1	-	1	1	-
4275006	TGCAGTGCAGCGCATCGACAACACTGACGCGCGAGTCCAAGGCCATCATGCAAAATACAAACGACAATT	1	-	1	1	1	1	1	0	1	1	1	1	1	1	1	1	1	1	-	1	1	1	1	1	1	-	1	1	1	1	1	1	1	1	1	-	1	1	1	1	1	1	1	-	1	1	1	1
4294936	TGCAGACGGTGGTGGTGACCACCAAGTGGGAGACGTTCGACAGCAGCCCGCCGAGATCGGAAGAGCGGT	1	1	1	1	-	1	1	1	1	1	1	1	1	1	1	1	-	1	1	1	1	1	1	1	1	1	1	1	1	1	1	1	1	1	-	1	1	1	1	-	1	1	1	1	1	1	1	1
4285201	TGCAGCAGCCTGCGATCGCGGCGACAGCGTACGCACGTACGTACGGGACCGAGATCGGAAGAGCGGTTC	1	-	1	1	0	1	-	1	1	1	1	1	1	1	1	1	1	1	1	-	1	1	1	1	1	1	1	1	1	1	-	1	1	1	1	1	1	1	1	1	1	-	1	1	1	1	1	-
4299681	TGCAGTGCACTTCTTCCTCCTCCTAATAATGATGTTCCGAGATCGGAAGAGCGGTTCAGCAGGAATGCC	1	-	1	1	-	1	-	1	1	1	-	1	1	1	1	1	-	1	-	1	1	1	1	1	-	1	-	1	1	1	1	1	1	1	1	1	1	1	1	1	1	1	-	1	-	0	1	1
4295985	TGCAGCTTGTCCGCGTCCGCGTACGCGAAGTCGAACGTGCCGAGATCGGAAGAGCGGTTCAGCAGGAAT	1	1	1	1	1	1	1	1	1	1	1	1	1	1	1	1	1	1	1	1	1	1	1	1	1	1	1	1	1	1	1	1	1	1	1	-	1	-	1	1	1	1	1	1	1	0	-	-
4284623	TGCAGCGCGCGCGGTGCACCGTGGGGATCCTCGTGGAGCGGCGCCTCCCCAGCATACCTGGCATCAGCG	1	1	1	1	1	1	1	1	-	1	-	1	1	1	1	1	1	1	1	-	1	1	1	1	1	1	1	1	1	1	-	1	1	1	-	1	1	1	1	1	1	0	1	1	1	1	1	1
4299899	TGCAGAATTTGTAATGACATGCTCTTCAATCTTGTGAACGAACTCAGGGTGCCGAGATCGGAAGAGCGG	1	1	1	1	1	1	1	1	1	1	1	1	1	1	-	-	1	1	-	1	1	1	1	1	1	1	1	1	1	-	1	1	1	1	1	1	1	1	1	1	1	1	1	1	1	1	0	1
4288476	TGCAGCCCGTCGTCTTCCTCCACGGCGGCCCTGGGGCCGAGATCGGAAGAGCGGTTCAGCAGGAATGCC	1	1	1	1	1	1	1	1	1	-	1	1	1	1	1	1	1	1	1	1	1	1	1	1	1	1	1	1	1	1	1	1	1	1	1	1	1	1	1	1	1	1	1	1	1	1	-	1
4269139	TGCAGCAGATGTTCAGCCAGAGCTACAGGCCGATGATGCCCGAGGAGGCCGAGATCGGAAGAGCGGTTC	1	-	1	1	1	1	1	1	1	1	1	1	1	1	1	-	1	1	1	1	1	1	1	-	1	1	1	1	1	1	1	1	1	1	1	0	1	1	1	1	1	1	1	1	1	1	1	1
4270860	TGCAGAAAAATGTGCATTTCCTCACAAAGGTTGCTGGGCTGGAGATATCTTACATTGCTCAAAGACCGA	1	1	1	1	1	1	1	1	1	1	1	1	1	1	1	1	1	1	-	-	1	1	1	1	1	1	1	1	1	1	1	-	-	1	1	1	1	1	1	1	1	1	-	1	1	1	-	1
4282252	TGCAGGCGTGACATCCGCGACGTTGGAGGGGGACAAGATCATCATCCTCGGCGACGGCGTCGACCCGAT	1	-	1	1	-	1	1	1	1	1	1	1	1	1	1	1	1	1	1	1	1	1	1	1	1	1	1	1	1	1	1	1	1	1	1	-	1	1	1	1	1	1	1	1	1	0	1	1
4301993	TGCAGCCAGGCATCGGGGTTGGTTATGTGCGCCGTTGTTTCATCTCCATTTCACAGTTTGGGTCCCAAA	1	1	1	1	1	1	1	1	1	1	1	1	-	1	1	1	-	1	-	1	1	1	1	1	1	1	1	1	1	1	-	1	1	1	-	-	1	1	1	1	1	1	1	1	-	-	1	1
4270447	TGCAGCTTGCTCGCTTCTTCTGCTTCTCCTTCTGGTGGCGCCGAGATCGGAAGAGCGGTTCAGCAGGAA	1	-	1	1	1	1	1	1	1	1	1	1	1	1	-	1	1	-	1	1	1	1	1	1	1	1	1	1	-	1	1	1	1	1	1	1	1	-	1	1	-	1	1	1	1	1	-	-
4277262	TGCAGTGTCAATGCAGTGCATGATCGGTCCAGTTGACTCTGCCTCCGAGATCGGAAGAGCGGTTCAGCA	1	1	1	1	1	1	1	1	1	1	1	1	1	1	1	1	1	1	1	1	1	1	1	1	1	1	1	1	1	1	1	1	1	1	1	1	1	1	1	1	1	1	1	1	1	1	-	1
4303655	TGCAGCTTCTCCCGGTACGAGTTGATCTTCTCCAGCTTCAGCCCGAGATCGGAAGAGCGGTTCAGCAGG	-	1	1	1	1	1	1	1	1	1	-	-	1	1	1	1	1	1	1	-	1	1	1	1	-	1	1	1	1	1	1	1	-	1	1	1	1	1	1	1	1	1	1	1	1	1	1	1
4291316	TGCAGGCGATATACCACCCGCGCAACCAGTACATCCTGCACTTGGATCTGGAGGCGCCGCCCCGAGATC	1	-	1	1	1	1	1	1	1	1	1	1	1	1	1	1	1	1	1	-	1	1	1	1	1	1	-	1	1	1	1	-	-	-	1	-	1	1	1	1	1	1	1	1	1	1	-	1
4296270	TGCAGCATATGGAAGTAGACCGTGCCACTATCCACACACCAGCGACGGCTGGCCGAGATCGGAAGAGCG	1	1	1	1	-	-	1	1	1	1	-	1	1	1	1	1	1	1	-	1	1	1	1	1	1	1	1	1	1	1	1	1	1	1	1	-	1	1	1	1	1	1	1	1	1	-	1	1
4278918	TGCAGTGCTGGTGCCTCAACTTCCGCGGCCGCGTGACCATCGCCTCGGTGAAGAACTTCCAGCTCACCG	1	1	1	1	1	1	1	-	0	1	-	-	1	1	1	1	1	1	1	-	1	1	1	1	1	1	1	1	1	1	1	1	1	1	1	1	1	1	-	1	1	1	1	1	1	1	1	1
4304594	TGCAGCAGCACGCCCCCGCCGCCGCGTTCCACGGCCACTCGCCGTACCCGAGATCGGAAGAGCGGTTCA	1	1	1	1	1	1	1	-	1	1	1	1	1	-	1	1	1	1	1	1	1	1	1	1	1	1	1	1	1	-	1	1	1	1	1	1	1	1	1	1	1	1	1	1	1	1	1	1
4268083	TGCAGTGTACTCGTAGTCACGTGGACTCGGGTAGGATAGCAGCCGAGATCGGAAGAGCGGTTCAGCAGG	1	1	1	1	1	1	1	-	1	1	1	1	1	1	1	1	-	1	1	-	1	-	1	1	1	1	1	1	1	1	1	1	1	1	1	1	1	1	1	-	1	1	1	1	-	-	1	-
4289934	TGCAGTTTGACAAGCACAAGCACACGCGCGCGCTCTATTTCTTTACGCGCAATGGAATTCCGAGATCGG	1	1	1	1	1	1	1	1	1	1	1	-	-	1	1	1	1	1	-	1	1	1	1	1	1	1	1	1	1	1	1	-	1	1	1	1	1	1	1	1	1	1	1	1	-	1	-	1
4276869	TGCAGGAACTGTGCTCGGATTGTACGAGGACAACCGATACAGATCTGAATCCAACAAGGTGCATCTCAA	1	-	1	1	1	1	1	1	1	1	1	-	1	1	1	1	1	1	1	-	1	1	1	1	1	1	1	1	1	1	1	1	1	1	-	-	1	-	1	1	1	1	1	1	-	1	1	1
4272561	TGCAGGGAGAGGTTGAGGTCGATGTTGCCCTCTCCCTCGCCACCGTTGGACTCCATATGTTGGCCGAGA	1	1	1	1	1	1	1	1	1	1	1	1	1	1	1	1	1	1	1	-	1	1	1	1	1	1	1	1	1	1	1	1	1	1	1	1	1	1	1	-	1	1	1	1	1	-	-	1
4271625	TGCAGCTTCACCATATCCAACTACTGCACCCACACCATCTGGCCGGGGACGATGGCCGAGATCGGAAGA	-	-	1	1	1	1	1	1	1	1	1	1	1	-	1	1	1	1	1	1	1	1	1	1	1	1	1	1	1	1	1	1	1	1	1	-	1	-	1	1	1	1	1	1	1	1	1	1
4280693	TGCAGCAGTAGTGGCACTCGAACTTGCGGTTGCTGTCCGAGATCGGAAGAGCGGTTCAGCAGGAATGCC	-	1	1	1	1	1	1	1	1	1	1	1	1	1	1	1	1	1	1	1	1	1	1	1	1	1	1	-	1	1	0	1	-	1	1	1	1	-	-	1	1	1	1	-	1	1	1	-
4274149	TGCAGGTCGCGCGCCATGTACACGTTGCTGTACGTGCCCTGCCCGATCTTGTCCAACCTCTCGAAGGTG	1	-	1	1	-	1	1	1	1	-	1	1	1	1	1	1	1	1	1	1	1	1	1	-	1	1	1	1	1	1	1	1	1	1	1	1	1	1	1	1	1	1	1	1	1	1	-	1
4285410	TGCAGAGTGTTTTAATGGCCGCACAGTGAAACTGCGTCCCTTTCCCTATCATCGCCTTCAATGAGCCAG	1	-	1	1	1	1	1	1	1	-	-	1	1	1	1	1	1	1	-	1	1	1	1	-	1	1	1	1	1	1	-	1	1	1	1	1	1	-	1	1	1	-	1	1	1	0	1	1
4298504	TGCAGGCCGTGTAGCAAACCAAACCACGCACCCAAAACGGGAAACGCATATGATAACCGAGATCGGAAG	-	-	1	1	-	1	1	1	1	1	1	1	1	1	1	1	1	1	1	1	1	1	1	1	-	1	1	1	1	1	1	1	1	1	1	0	1	1	-	1	1	1	1	1	-	1	-	1
4277485	TGCAGAAGCGCGGCAAGAGTGCTCTGAGCTCGGATCAGCACGAGCGGGCAGCCGAGCGCCTCCAGCGAC	1	-	1	1	1	1	1	-	-	-	1	1	1	1	1	1	1	1	1	-	1	1	1	1	-	1	1	1	1	1	1	1	1	1	-	1	1	1	1	1	1	1	-	1	1	-	1	1
4299111	TGCAGCTGCCTCGTCGCCGCGCGCTGCTGCCCATGCGAGCTCATGCCGAGATCGGAAGAGCGGTTCAGC	1	1	1	1	1	1	1	1	1	1	1	1	1	1	1	1	1	1	-	1	1	1	1	1	1	1	1	1	1	1	1	1	1	1	1	1	1	1	1	1	1	1	1	1	1	-	1	1
4304190	TGCAGTGCGGTGTGCAGGGGGCGGACCGATCAGAGTGTCCTGACTCCGAGGTATCCGAGATCGGAAGAG	-	1	1	1	1	1	1	1	1	1	1	1	1	1	1	1	1	1	-	1	-	1	1	1	1	1	-	1	-	-	1	1	1	1	1	1	1	1	-	1	-	1	1	1	1	1	1	1
4277597	TGCAGACGGACATCAACATGGCGCGCCGCGCGCTGCGCGAGGCGCTCACCACGCTCGACGACATCAAGC	1	1	1	1	1	1	1	1	1	1	-	1	1	1	1	1	1	1	-	1	1	1	1	1	1	1	-	-	1	-	1	1	1	1	1	1	1	1	1	1	1	1	1	1	1	0	-	1
4302246	TGCAGCATTCTCCGAGGCCGGCAGCGTTGACGATGTCCAGGTACTCGCAAGCTAAATGCAATCCAAGTC	1	-	1	1	1	1	1	1	1	1	1	1	1	1	1	1	1	1	1	1	1	1	1	-	-	1	1	1	1	1	1	1	1	1	1	1	1	1	1	1	1	1	1	-	1	1	-	1
4265643	TGCAGGGTGCGGCGCCACACGATTTCGGTCTTCGTCGGGGACGAGAGCGGCATGATAAACAGGATCGCC	1	1	1	1	1	1	1	1	1	1	1	1	1	1	1	1	1	1	1	1	1	1	1	1	1	1	1	1	1	1	-	1	-	1	1	1	1	1	1	-	1	1	1	1	1	0	1	1
4293508	TGCAGAGATACCCTGACATGAGCAAGGCTCTGATGCAGGCCGAGATCGGAAGAGCGGTTCAGCAGGAAT	-	1	1	1	1	1	1	1	1	1	1	1	1	1	1	1	1	1	-	1	1	1	1	1	1	1	1	-	1	1	-	1	-	1	1	1	1	1	1	1	1	1	1	1	1	1	-	1
4274754	TGCAGATCGAGCAGAGGTGCAAGCGGCAGCCCTTTGCCCTGCTCTTTCATGTTGTTCATCTTTCAACAT	1	1	-	1	-	1	1	-	1	1	-	-	1	1	1	1	1	1	1	0	1	1	1	1	1	1	1	1	1	1	1	1	1	1	1	1	1	1	1	1	1	1	1	1	1	1	1	1
4292609	TGCAGCATCCTGTACAGGAGCAGAGCGGACATGCGGGCCTGGTCGCGCACCGCCTCCAGGTCGCGGTGC	1	-	1	1	1	1	1	1	1	1	1	1	1	1	1	1	1	1	1	1	1	1	1	1	-	1	1	-	1	1	-	1	1	1	-	1	1	1	1	1	1	1	1	1	1	1	1	1
4300843	TGCAGAACGCCAACAGCAGCGTCGCCTCCTGACACTAGGAAAGGCCAGCCGAGATCGGAAGAGCGGTTC	1	-	-	-	1	1	1	1	1	1	1	1	-	1	1	1	1	1	1	1	1	1	1	1	1	-	1	1	1	1	1	1	1	1	1	1	1	1	1	1	1	1	1	1	1	1	1	-
4291362	TGCAGGTGCGAGGTGGAGGCCGCGGGCATCAACTACCACATCACCGTCTCCGCCCGAGATCGGAAGAGC	1	1	0	1	-	1	1	1	1	-	1	1	1	-	-	1	1	1	1	-	1	1	1	1	1	1	1	1	1	1	1	1	1	1	1	-	1	1	1	1	1	1	1	1	1	1	1	-
4271638	TGCAGCTCCACCCCGCGCCTCCTCCGCTCTGCCCCGCCGAGATCGGAAGAGCGGTTCAGCAGGAATGCC	-	-	-	1	1	1	-	1	1	1	1	1	1	-	1	1	1	1	1	1	1	1	1	1	1	-	1	1	1	1	1	1	1	1	1	1	1	1	1	-	-	1	1	1	1	1	1	-
4273416	TGCAGCAGTTCAGGAAGAAGAAGGAGAAAAAGGGTCCCGAGATCGGAAGAGCGGTTCAGCAGGAATGCC	1	-	1	1	1	1	1	1	1	1	1	-	1	-	1	1	1	1	0	1	1	1	1	1	-	1	1	1	1	1	1	1	1	1	-	-	1	1	1	1	1	1	1	1	1	1	1	1
4290749	TGCAGGGACGGATCCATGGGGTCGCTCTCTTCCTGGAGGTTCCCGCCGCCGCCGAGATCGGAAGAGCGG	1	1	1	1	1	1	1	1	1	1	1	1	1	1	1	1	1	1	1	1	1	1	1	1	1	1	1	1	1	1	1	1	1	1	-	1	1	-	1	-	1	1	1	1	-	1	-	1
4301358	TGCAGCTGGATGACTGGGTGCTCTGCCGAATCTACAACAAGAAGGGCGTCATCGAGCGGTACGACACGG	1	1	1	1	1	1	1	1	1	1	1	1	1	1	1	1	1	1	-	1	1	1	1	1	1	1	1	1	1	1	1	1	1	1	1	1	1	1	1	1	1	1	1	1	1	1	-	1
4281517	TGCAGAGGCTCCGCGGGACGTGCCACCAATGGCGCGGCGTGATCAGCGACCCCTGCTTCATCATGGACC	1	1	1	1	1	1	1	1	1	1	1	-	1	1	1	1	1	1	1	1	1	1	1	-	-	1	1	1	1	1	0	1	1	1	1	-	1	1	1	1	1	1	1	1	1	1	-	1
4282531	TGCAGATGGTCGTTGCTGCATGAGAAACGAGACTTTTCAAAAGCGAGAGGATCGCAACAACTTCCTTTG	1	1	1	1	1	1	1	1	1	1	1	-	1	1	1	1	-	1	1	1	1	1	1	1	1	-	1	1	1	1	-	1	1	1	1	1	1	1	1	1	1	-	1	1	1	-	-	1
4291685	TGCAGCTGCACGCCAAGATGGTCGCGCCCGTGGAGCAGTCTACCGGCACGCCCATCACCGATTGAGCGG	1	1	1	1	1	1	1	1	1	1	1	1	1	1	1	1	1	1	1	1	1	1	1	1	1	1	1	1	1	1	-	1	1	1	1	1	1	1	1	1	1	1	1	1	1	1	-	1
4303315	TGCAGGCTTCTGGCACTACAAACAAAACAATCCAAGCATATGTGTCAGTATAAAACCAGTAACCGAGAT	1	-	1	1	-	1	1	1	1	1	1	-	1	1	1	1	1	1	1	1	1	1	1	1	1	1	1	1	1	1	1	1	1	1	1	1	1	1	1	1	1	-	1	1	1	1	-	1
4273525	TGCAGGAAATCCGCCATCGCTCGCCCGATATCGGAAGAGCGGTTCAGCAGGAATGCCGAGACCGATCTC	1	1	1	1	1	1	1	1	1	1	-	1	1	1	1	1	1	1	1	1	1	-	1	-	1	1	1	1	1	1	0	-	1	1	1	1	1	-	1	-	1	1	1	1	-	1	1	1
4325700	TGCAGACCTCGCCCACCAGCAGACGCCAGATCCACAACATCCCTGGCCAAGATCGCCTTGCCGAGCACT	1	-	1	1	1	1	1	1	1	1	-	-	1	1	1	1	-	1	1	-	1	1	1	-	1	1	1	1	1	-	1	1	1	1	-	-	1	1	1	1	1	1	1	1	1	1	1	1
4266667	TGCAGCAGATTCCAGGCACGCCCGAGTGCAGGTCAGGATCGAGCGACCGAGATCGGAAGAGCGGTTCAG	1	-	1	1	1	1	1	1	1	1	1	1	-	1	1	1	-	1	1	1	1	1	1	1	1	1	1	1	1	-	1	-	-	1	1	0	1	1	1	1	1	1	1	1	1	1	1	1
4270417	TGCAGACGAGTTGCATATGGTCATTACGTGCGTTCGGCGTCAACGACCGAGATCGGAAGAGCGGTTCAG	1	-	1	1	1	1	1	-	1	1	1	1	1	1	1	1	1	1	1	1	1	1	1	1	1	1	1	1	1	1	1	1	1	1	1	1	1	1	1	1	1	1	1	1	1	1	1	-
4294941	TGCAGTGCAGCGCGTCACAAGTTAGAGACGGAATCGCCATGGAATTTACCGAGATCGGAAGAGCGGTTC	1	1	1	1	1	1	1	-	1	1	1	1	-	1	1	1	1	1	1	1	1	1	1	1	1	1	1	1	1	1	1	1	1	1	1	1	1	1	1	1	1	1	1	1	1	1	1	1
4280174	TGCAGCACGCTCTCCGACTCGGCGTCCAGCGCGCTCGTCGCCTCGTCCAGCAGCAGGATGGCCCAGATC	1	-	1	1	1	1	1	1	-	1	1	1	1	1	1	1	1	1	1	1	1	1	1	1	1	1	1	-	1	1	1	-	1	1	1	1	1	1	1	1	1	1	1	1	1	1	1	1
4296254	TGCAGGTCAATGAGAAGCGCCATGCATACAAGTCACGGGAGGCCCAGGTCTGATCCCACGGGCCAGGCC	1	1	1	1	1	1	1	1	1	1	1	1	1	1	1	1	-	1	1	1	1	1	1	1	1	1	1	1	1	1	1	1	1	1	1	-	1	1	1	1	1	1	1	1	1	1	1	1
4271291	TGCAGCGCTGCATGCCGATATTTATACGGAGGACTGCATGGCTTGTCCGAGATCGGAAGAGCGGTTCAG	-	-	1	1	1	1	1	1	1	1	1	1	1	1	1	-	1	1	1	1	1	1	1	1	1	1	1	1	1	1	1	1	1	1	1	-	1	-	1	1	1	1	1	1	1	1	0	1
4317981	TGCAGATGAAGTAGCGCTTCCCGGCAGTGGTGAGCTTGACGGTGGTCTTGCCGCCGAGATCGGAAGAGC	1	-	1	1	1	1	1	1	1	1	1	1	1	1	-	1	1	1	-	-	-	1	1	1	1	1	1	1	1	1	1	1	1	1	-	1	1	1	1	1	1	1	1	-	1	-	1	-
4272814	TGCAGGGGTTTACAAGTGCAAGTCCACTGGCCTGCCTGCACGTATGTGTGTTTTGTTTGCACCGAGATC	1	-	1	1	1	1	1	1	1	1	1	1	1	1	1	1	1	-	1	1	1	1	1	1	1	1	1	1	1	1	1	1	1	1	-	-	1	1	-	-	1	1	-	1	-	1	1	1
4275351	TGCAGGGTTCTTCGAGTCCCGGCGCGCGTGCTGCGGGACGGGGACGATCGAGACGTCGGTGCTGTGCCA	-	1	1	1	1	1	1	1	1	1	1	-	-	1	1	1	1	1	1	1	1	1	1	-	1	-	1	1	1	1	0	1	1	1	1	1	1	1	1	1	1	1	1	1	1	1	1	1
4276867	TGCAGCTCCTCGAAAAGAAGGAGGAATATCCGTGCTCCATCTCCCCGAGATCGGAAGAGCGGTTCAGCA	1	-	1	1	-	-	1	1	1	1	1	1	1	1	1	1	1	1	-	1	1	1	1	1	1	1	1	1	1	1	-	-	1	1	1	-	1	-	1	1	1	1	1	1	1	1	0	1
4320549	TGCAGCTCTAGTGGGGAATTTAGGTACAGGGAAACAGTGGCATTATCTTTCATTACATCCGAGATCGGA	-	-	1	1	1	1	1	-	1	1	1	1	1	1	1	1	1	1	1	1	1	1	1	1	-	1	1	1	1	1	1	1	1	1	1	1	1	1	1	1	1	-	1	1	1	1	1	1
4287343	TGCAGCAGCCGCCGCCGCTGCACCTGCTCCCCGCCGCCGCCACGTGCTACGGGAAACCCATGGCCGAGA	1	1	1	1	1	1	1	1	1	1	1	1	1	1	1	1	-	1	-	1	1	1	1	-	1	1	1	1	1	1	1	1	-	-	1	1	1	1	1	1	1	1	1	1	1	1	1	1
4327758	TGCAGCTTCTGCTTTCGGTACATAAATGATTTTGTCTTCAAAATGAAAGCCTACAGCCATGTGGACCGA	1	1	1	1	1	1	1	1	1	-	1	1	1	1	1	1	1	1	-	-	1	1	1	-	1	1	1	1	1	1	1	1	1	1	1	1	1	1	-	1	1	1	1	1	1	1	1	1
4281851	TGCAGCGACCGCCGAGATGTACGACTCAGAGCTCAAGTTCTTGGCCGCCGAGATCGGAAGAGCGGTTCA	1	-	1	1	-	-	1	1	1	1	1	1	1	1	1	1	1	1	-	1	1	1	1	1	1	1	1	1	1	1	1	1	1	1	1	1	1	1	1	1	-	1	1	1	1	1	1	1
4327520	TGCAGAAGAGATTGGTTTTAGACTACGGAGGCGCTGTACTACGTACCTGGGGGCGTGGCGCAGCAGAGG	1	1	1	1	1	1	1	1	1	1	1	-	1	1	1	1	1	1	-	1	1	1	1	-	-	1	1	-	1	1	1	-	1	-	-	1	1	1	1	1	1	1	1	1	1	0	1	1
4264537	TGCAGCGAATCAACATGGTAGAAGGTGTAATCAGTATACACTTCAACCAAACAGTGAATCAAACAACAT	1	1	1	1	1	1	1	1	1	1	1	1	1	1	1	1	1	1	-	1	1	1	1	1	1	1	1	1	1	1	1	1	1	-	1	-	1	1	1	1	1	1	1	1	1	-	1	1
4300376	TGCAGTTCAGCGTTGGCTGAAGACGCGAGCGCCACCCGAGATCGGAAGAGCGGTTCAGCAGGAATGCCG	-	-	1	1	-	1	1	1	1	1	1	-	1	1	1	1	1	1	1	1	1	1	1	1	1	1	1	1	1	1	1	1	1	1	1	0	1	1	-	1	1	1	1	1	1	1	1	-
4302081	TGCAGGTCCTTCTGGAAGCGGCTCCACCTGCCGCCCTCCACCGAGATCGGAAGAGCGGTTCAGCAGGAA	-	-	-	1	1	1	1	1	1	1	1	1	-	1	1	1	1	1	1	1	1	1	1	-	1	1	1	-	1	1	1	-	-	1	-	0	1	1	1	-	1	1	1	-	1	1	1	1
4273877	TGCAGACTGCATACAAGGAGCATGACAGACTGAACGGAGATCACACCAATCATCCGATCCACCGAGATC	1	1	1	1	1	1	1	1	1	1	1	1	1	1	1	1	1	1	1	1	1	1	1	1	1	1	1	1	1	1	1	1	1	-	1	-	1	1	1	1	1	1	1	1	-	0	-	1
4327022	TGCAGCTCAAGATGGTCGCCGTAGCCGCTATCCTTGTCTCGAGCGCCGCCGAGATCGGAAGAGCGGTTC	1	1	1	1	1	1	1	-	1	-	-	1	-	1	1	1	1	1	1	1	1	1	1	1	1	-	1	1	1	1	1	1	1	1	1	1	1	1	1	1	1	1	1	-	1	1	1	1
4296173	TGCAGTGCAGTTATGCTTTTGCAGATCAGGACCATGTTGCTCCGAGATCGGAAGAGCGGTTCAGCAGGA	1	-	1	1	-	1	1	1	1	1	1	-	-	1	1	-	-	1	1	-	1	1	1	1	1	1	1	1	1	1	1	1	1	1	1	1	1	-	1	1	1	1	1	1	1	1	1	1
4298652	TGCAGCAGGTGGCTGGTGGCCTTGTCGACCCGCGACGCCGCCGAGATCGGAAGAGCGGTTCAGCAGGAA	1	1	1	1	1	1	1	1	1	1	-	1	1	-	1	1	1	1	1	1	1	1	1	1	1	1	1	1	1	1	1	1	1	1	-	-	1	1	1	1	1	1	1	1	1	1	1	-
4267798	TGCAGACTTTGACGTATTGCCCGTCGGCCAAATATCTTAGGCGACCGAGATCGGAAGAGCGGTTCAGCA	1	-	1	1	-	1	1	1	1	1	1	-	1	1	1	1	-	1	1	1	1	1	1	-	-	1	1	1	1	1	-	1	1	1	1	1	1	1	1	1	1	1	1	1	1	1	1	1
4300052	TGCAGCGCGGCCTCGAGGTCGCCCAGGGCGCCGAGTCGTTCGGCATTGATGTAGCGATCCGAGATCGGA	1	-	1	1	-	1	1	1	1	1	1	1	1	1	1	1	-	1	1	1	1	1	1	1	1	1	1	1	1	1	0	-	1	1	1	1	1	1	1	1	1	1	1	1	1	1	1	-
4327859	TGCAGCCCAGCCCATTATTGTGCTCCGTGTCGGCCTCTTTAGAGCCCGAGATCGGAAGAGCGGTTCAGC	1	-	1	1	1	1	1	1	1	1	1	-	1	1	1	1	-	1	1	1	1	1	1	1	1	-	1	1	1	1	1	1	1	1	1	1	1	1	1	1	1	1	1	0	1	1	1	1
4294888	TGCAGGATCACCTGCCGCTTCTTACTGCGACAGGCGGCTCCGAGATCGGAAGAGCGGTTCAGCAGGAAT	-	-	1	1	1	1	1	1	1	1	1	1	1	1	1	1	1	1	1	1	1	-	1	1	-	1	1	1	-	-	1	1	1	1	1	1	1	-	1	1	1	1	1	1	1	1	1	1
4278919	TGCAGAGCTCCACGATGTCGCGCACCACCCCGGCAGCCTCCTCCTCCGAGATCGGAAGAGCGGTTCAGC	-	1	1	1	1	1	1	1	1	1	1	1	1	1	1	1	1	-	-	1	1	1	1	1	1	1	1	1	1	1	1	1	-	1	1	-	1	1	1	1	1	1	1	1	-	1	1	1
4298093	TGCAGGCGCTCGTCATGGACCGCGCCGTGGGGCCATTCACGGTGCCGAGATCGGAAGAGCGGTTCAGCA	1	-	1	1	1	1	1	1	1	1	1	1	1	1	1	1	1	1	1	1	1	1	1	1	1	1	1	1	1	1	-	1	1	1	1	1	1	1	1	-	1	1	1	1	1	-	1	-
4328764	TGCAGAACCACCTCAGTCCCATATCGTCGCCACCTTCTTCGGCGTCTGCATCTCGCTGTACGGCGCCCC	1	1	1	1	1	1	1	1	1	1	1	1	1	1	1	1	1	-	1	1	1	1	1	1	1	1	1	-	1	1	1	1	1	1	1	1	1	1	1	1	1	1	-	1	1	-	1	1
4291141	TGCAGCACCGTGGCGTTGCGAGGGAGGAACACCATGTTGGCGAGCCCAGCGCCATGCACGCCCACCATC	1	1	1	1	1	1	1	1	-	1	1	1	1	1	1	-	1	1	-	0	1	1	1	1	1	1	1	1	1	1	-	1	1	1	-	-	1	1	1	1	1	1	1	1	-	-	1	1
4294100	TGCAGAACAGAGGACAAGACAACCAAAACCACGGTACAACGCTGATACGAACTCCAGACCCGAGATCGG	1	-	1	1	1	1	1	1	1	1	1	1	1	1	1	1	1	1	1	1	1	1	1	1	1	1	1	1	1	1	1	1	1	1	1	1	1	1	1	1	1	1	1	1	-	1	1	-
4266595	TGCAGCCGCTTGGATTGCCACACGAGCTTGCGCATCTGGTCGAAGCGCGGGCTCAGGTGCTTGATCACC	1	-	1	1	-	1	1	1	1	1	1	1	1	1	1	1	1	1	-	1	1	1	1	-	1	1	1	1	1	1	-	1	1	1	1	1	1	-	1	-	1	1	1	1	-	1	0	1
4293227	TGCAGGTTCGGCAACACGTCGAGCAGCTCGCTGTGGTACGAGCTCGCCTACTGCGAGGCCAAGGGCAGG	-	-	1	1	-	1	1	1	1	1	1	1	1	1	1	1	1	1	-	1	1	1	1	1	1	1	1	1	1	1	1	1	1	1	1	-	1	1	1	-	1	1	1	1	1	1	1	1
4274085	TGCAGGCGCCCAGCAGCGCGCCCCAGACCACCGAATGCTCCTGGCAGTCCGAGATCGGAAGAGCGGTTC	1	-	1	1	1	1	1	1	1	1	1	1	1	1	1	1	1	1	-	1	1	1	1	1	1	1	1	1	1	1	1	1	1	1	1	1	1	-	1	-	1	1	1	1	-	-	1	1
4288290	TGCAGCGGGACGTGGAGACCTTGCCGTACGCCGTCGTCGACCGAGATCGGAAGAGCGGTTCAGCAGGAA	1	-	1	1	1	1	1	1	1	1	1	1	1	1	1	1	1	1	1	1	1	-	1	1	1	1	1	1	1	1	-	1	1	1	-	1	1	-	1	1	1	1	-	1	1	1	1	1
4286082	TGCAGAGAGGGCACGTCTCGCTCCTCTTGAGGGCTTGCACGAGGCACGCGCCATGGAAGACGTGGGGCC	1	1	1	1	1	1	1	1	1	1	1	1	1	1	1	1	1	1	1	1	1	1	1	1	1	1	1	1	1	1	1	1	1	1	1	1	1	1	1	1	1	1	1	1	1	1	1	1
4298678	TGCAGTGGTAGTATGTTGCCGCCGGCCAGGTGCACGTTTGCCGAGTCCGCTAGCGCTGGGAGCGTCACT	1	1	1	1	1	-	1	1	-	1	-	1	1	1	1	1	-	1	1	-	1	1	1	1	1	1	1	1	1	1	1	1	1	1	1	1	1	1	1	1	1	1	1	1	1	1	1	1
4272317	TGCAGCCTTTCCCAAGCGCATTGTTCGTTCAGATCGAGGACCACCGAGATCGGAAGAGCGGTTCAGCAG	-	1	1	1	-	1	1	1	1	1	1	1	1	1	1	1	1	1	1	1	1	1	1	1	1	1	1	1	1	1	1	1	1	1	1	1	1	-	1	1	1	1	1	1	1	-	1	1
4277265	TGCAGCTCCTGTCGGTGCTGTTACTGTGGCCTGCCTGCCTGCATGCATGCGGGCACGCCTATGCCTGAT	1	-	1	1	0	-	1	1	1	1	1	1	1	1	1	1	1	1	1	1	1	1	1	1	-	1	1	1	1	-	-	1	1	1	1	-	1	1	-	1	1	1	1	1	1	1	1	1
4269604	TGCAGGGCCAGTTCACCGACATGGTCACGGCCGGCGCCCACGCCGAGATCGGAAGAGCGGTTCAGCAGG	1	1	-	1	1	1	1	1	1	1	1	1	1	-	1	1	1	1	1	1	1	1	1	1	1	1	1	-	1	-	1	1	1	1	-	1	1	1	1	1	1	1	-	-	1	1	1	1
4279337	TGCAGCGCCTCATCTTTTGCCTGCTCCTGCCTACACCGACTCGACCATCGCAATGTGATTCCCCCGAGA	-	1	1	1	1	1	1	1	1	1	1	1	1	1	1	1	-	1	1	1	1	1	1	1	1	-	1	1	1	1	1	-	1	1	-	1	1	1	1	1	1	1	-	1	1	-	0	1
4270615	TGCAGGTCGGGTCTGCGGCGCGTGGTCTCCCGCCACCTGTTGAGGTCGTAGCCGAGATCGGAAGAGCGG	1	-	1	1	1	1	1	-	1	1	1	1	1	1	1	1	1	1	1	-	1	-	1	1	-	1	1	1	1	1	-	1	1	1	1	1	1	1	-	1	1	1	1	1	1	1	-	1
4285777	TGCAGCTCCAATCAGCCGTCCGCGTACACCGTACACGACTCCATCACGCTTAGATTCGCTCGAGCACGC	1	1	1	1	1	1	1	1	1	1	1	-	1	1	1	1	1	1	1	1	1	1	1	1	-	-	1	1	1	1	1	1	1	1	1	1	1	1	1	1	1	1	-	1	1	1	1	1
4304633	TGCAGCGCACCTGTCTAATTTGACTAATTGCCACCAGCATGGACCGAGATCGGAAGAGCGGTTCAGCAG	1	-	1	1	1	1	1	1	1	1	-	-	1	1	1	1	1	1	1	1	1	1	1	1	1	1	1	1	1	1	1	1	-	1	-	1	1	1	-	1	1	1	1	1	1	1	-	1
4295564	TGCAGACCCTGGAATAATGTGGTCGAATCTTGGAAGGGTCAATCGATTGTGTCAATGTTTAGTCGTCAC	1	-	1	1	1	1	-	1	1	1	1	-	1	1	1	-	1	1	1	1	1	1	1	1	1	1	1	1	1	1	1	1	1	1	-	1	1	1	1	1	1	-	1	1	-	1	1	-
4301667	TGCAGCAGAGCACCATCAAGAAGTGGGCCGGCAAGAAGGAGAACGTCGCCGACGCGCAGGCCACCTTCC	-	-	-	1	1	1	1	1	1	1	1	1	1	1	1	1	1	-	1	1	1	1	1	1	-	1	1	1	1	1	1	1	1	1	1	1	1	1	1	1	1	1	1	1	1	0	-	1
4328065	TGCAGTTGTACGGCGCTTCCGCCCCCGCCGCCACGCTCCCGAGATCGGAAGAGCGGTTCAGCAGGAATG	-	-	1	1	1	1	1	1	1	1	1	1	1	1	1	1	1	1	-	1	-	1	1	1	1	1	1	1	1	1	1	1	1	1	-	-	1	1	1	1	1	1	1	1	-	1	1	1
4297482	TGCAGGGGCAGTTCGAGATCCTGTCGCTCACGGGCACGGTTCTGCCGCCGCCGAGATCGGAAGAGCGGT	1	1	1	1	1	1	1	1	1	1	1	1	1	1	1	1	1	1	-	1	1	1	1	1	1	1	1	1	1	1	-	1	1	1	1	0	1	1	1	1	1	1	1	1	1	1	-	1
4300590	TGCAGGACATCGACGACTGGCTGCCCATCACCTCCTCCCGAGATCGGAAGAGCGGTTCAGCAGGAATGC	1	1	1	1	1	1	1	1	1	1	1	1	1	1	1	1	-	1	1	1	1	1	-	1	1	1	1	1	1	1	1	1	1	1	-	1	1	1	1	-	1	1	1	1	1	1	1	1
4287058	TGCAGCTTGGTGATGATGTCAACCTCCCGGAGGAAGTCCTTGGACGCCTCCGCCGACGCCCGAGATCGG	-	1	1	1	-	-	1	-	1	1	1	1	1	1	1	1	1	1	1	-	1	1	1	-	1	1	1	1	1	1	1	1	1	1	1	1	1	1	1	1	1	1	1	1	1	1	1	1
4283821	TGCAGCGCGCAGCCAGGCGGATCCTTTGGCTGGCCGTGGCCGAGATCGGAAGAGCGGTTCAGCAGGAAT	1	1	1	1	1	1	1	-	1	1	1	1	1	1	1	-	1	1	-	1	1	-	-	1	1	1	-	1	1	1	1	1	1	1	1	1	1	1	1	-	1	1	1	1	1	1	1	1
4268571	TGCAGCTTTGGGCACGAGGCCAAGACACCCTCGTAGGCGGCCCAGATCGGAAGAGCGGTTCAGCAGGAA	1	1	1	1	1	1	1	1	1	1	1	1	1	1	1	1	1	1	1	1	1	1	1	-	1	1	1	1	1	1	1	1	1	1	1	1	1	1	1	1	1	1	1	1	1	1	-	1
4266390	TGCAGCAGCAGTTTCACTTGGAGTGAAAGCTTGCTCCTCCGAACTGGGCATTTTCCCGAGATCGGAAGA	1	-	1	1	1	1	1	-	1	1	-	1	1	1	1	1	1	1	1	1	1	1	1	1	1	1	1	1	1	1	-	1	1	1	1	1	1	1	1	-	1	1	1	1	-	1	1	-
4282584	TGCAGGCCTTCTGGACGGAGGTGCGCACAGAGGGACACGGAGACAAGAAGGACGCGCCGTGGTGGCCTA	1	1	1	1	1	1	1	-	1	1	1	1	1	1	1	1	1	1	1	1	1	1	1	1	-	1	1	1	1	1	1	1	1	1	1	-	1	1	1	1	1	1	1	1	1	1	-	1
4286359	TGCAGACTAGCAATGCTGGAATTCGTGGGGATTAACGGATGCATGCAGAATGCATGCCGAGATCGGAAG	1	1	1	1	-	1	1	1	1	1	1	-	0	1	1	1	1	1	1	1	1	1	1	-	1	1	1	1	1	1	1	1	-	1	1	1	1	1	1	1	1	1	-	1	-	1	1	1
4301979	TGCAGTAAATCTGACACTGACTAGGTTTTCCATTCACCGAGATCGGAAGAGCGGTTCAGCAGGAATGCC	1	1	1	1	1	1	1	1	1	1	1	1	1	1	1	1	1	1	1	1	1	-	1	1	1	-	1	1	-	1	1	1	1	1	1	1	1	1	1	1	1	1	1	1	1	1	1	1
4266692	TGCAGGAACGGGAGCTACCTGGCCGAATCTCGCCGCCGAGATCGGAAGAGCGGTTCAGCAGGAATGCCG	-	1	1	1	1	1	1	1	1	1	1	1	1	1	1	1	1	1	1	1	1	1	1	1	1	1	1	1	1	1	1	-	1	1	1	1	1	1	1	1	1	-	1	1	1	1	1	-
4293050	TGCAGGTCAGGCTCGTTGGGATGGTGAGCGGCAAGGCGGAGCGGAACACGGACGTCTCCTTCACCCTCG	1	1	1	1	-	1	1	-	1	1	1	-	1	1	1	1	1	1	1	1	1	1	1	1	-	1	1	1	1	1	1	1	1	1	1	-	1	1	1	1	1	1	1	1	-	-	1	1
4277499	TGCAGATGTACGGGTTCATCCTCGTCGTGCTGCTCGGCCTCCTGGGCGCCTACGCCGCCGAGATCGGAA	1	1	1	1	1	1	1	1	1	1	1	1	1	1	1	1	1	-	1	1	1	1	1	1	-	1	1	1	1	1	1	1	1	-	-	-	1	-	1	1	1	1	1	1	1	1	1	1
4328191	TGCAGGGGCGTCTCCGTGCCGCAGGCCCCCGTCACCTCCACCGAGATCGGAAGAGCGGTTCAGCAGGAA	-	1	1	1	1	1	1	1	1	1	1	1	1	1	1	1	1	1	1	1	1	1	1	1	1	1	1	1	1	1	-	1	1	1	1	1	1	1	1	-	1	1	1	1	1	1	1	-
4277238	TGCAGTTCTTGGCTCAGCCTCCGCTGCCGAAGCGCTGCCGAGATCGGAAGAGCGGTTCAGCAGGAATGC	-	1	1	-	1	1	1	1	1	1	1	1	1	1	-	-	1	1	1	-	1	1	1	1	1	1	1	1	1	1	1	1	1	1	1	1	1	-	1	-	1	1	1	1	1	1	1	1
4309672	TGCAGTTTCTTGTTCCCATTTTAATCTTGGGGCTTGCATTTGGTATCCGAGATCGGAAGAGCGGTTCAG	1	1	1	1	-	1	1	1	1	1	1	1	1	1	1	1	1	1	1	1	1	1	1	-	1	1	1	1	1	1	-	1	1	1	1	1	1	-	1	1	1	1	1	1	1	1	-	-
4327642	TGCAGCGCCTGGTCGACCATGGCGGCGCGCGACGCCGAGATCGGAAGAGCGGTTCAGCAGGAATGCCGA	1	-	1	1	1	-	1	1	1	1	1	1	1	1	-	1	1	1	1	1	1	1	1	1	1	1	1	1	1	1	1	1	1	1	1	1	1	1	1	1	1	1	1	1	1	1	1	1
4328694	TGCAGGGCCCACCGCCGCTGCGACTCCTGGGTCTTCTGCGGGGACCGCCGCAGGTGCGACAACCGCTTC	1	1	1	-	1	1	1	1	1	1	1	1	1	-	1	1	1	1	1	1	1	1	1	1	1	1	1	1	1	1	1	1	1	1	1	1	1	1	1	1	1	1	1	-	1	1	1	1
4265766	TGCAGCCTCTCCTTCTTCACCTCCCTCAGGCGCTCCTCCTCCTGTGCCGGCCTCATCCTCTTGCCGCCG	1	1	1	1	1	-	1	1	1	-	1	1	1	1	1	1	1	1	1	1	1	1	1	1	1	1	1	1	1	1	-	1	1	1	1	1	1	1	1	1	1	1	1	1	1	1	1	1
4290476	TGCAGCACCAGGCGCTACTCTCGGTCACCACATTCCCGAGATCGGAAGAGCGGTTCAGCAGGAATGCCG	1	-	1	1	1	1	1	1	1	1	1	1	1	1	1	1	1	1	1	1	1	1	1	1	1	1	1	1	1	1	-	1	1	1	1	1	1	1	1	1	1	1	1	1	1	1	1	1
4283599	TGCAGCGCGGCAGCCACGACGGCCTCGCCCTCCTCCTGCGGCCCCAGATCGGAAGAGCGGTTCAGCAGG	1	1	1	-	1	1	1	1	1	1	1	1	1	1	-	1	1	1	1	1	1	1	1	1	1	1	1	1	1	1	-	1	1	1	1	1	1	1	1	1	1	1	1	1	1	1	1	1
4301813	TGCAGGTTGTTCGCGGGTGGGAGCCGCCGCCATGCAGGAAGCTCCCCTCGCTCCGAGATCGGAAGAGCG	1	1	1	1	1	1	1	1	1	-	-	1	1	1	1	1	1	-	-	1	1	1	1	1	1	1	1	-	1	1	1	1	1	1	1	1	1	1	1	1	1	1	1	1	-	0	1	1
4268340	TGCAGCTGTTCACGGAACACCCTGAGGATGTCGGCGAAGGTGACGATCCCGAGATCGGAAGAGCGGTTC	1	1	1	1	1	1	1	1	1	1	1	1	1	1	1	-	1	1	-	1	1	-	-	1	1	1	1	1	1	1	1	-	1	1	1	-	1	-	-	1	1	1	1	1	1	1	1	1
4289910	TGCAGCAGTATGGTGTGCGTACGTGTTTCGGCCAGCTGCATGCATGCAAATGTGATCGCTCCGAGATCG	1	1	1	1	1	1	1	1	1	1	1	-	-	1	1	1	1	1	1	1	1	1	1	1	1	1	1	1	1	1	1	1	1	1	-	1	1	1	-	-	1	1	1	1	-	-	1	1
4326885	TGCAGTGGAGAAGAAGCCGACGATGGCCACACGCTGTCCGAGATCGGAAGAGCGGTTCAGCAGGAATGC	1	-	1	-	-	1	1	-	1	1	1	-	1	1	-	-	1	1	1	1	1	1	1	1	1	-	1	1	1	1	1	1	1	1	1	1	1	1	1	1	1	1	1	1	1	1	-	1
4280059	TGCAGCAGCTCCCCCTTGGCACCGAGATCTGAAGAGCGGTTCAGCAGGAATGCCGAGACCGATCTCGTA	1	1	1	1	1	1	1	1	1	1	1	1	1	1	1	1	1	1	1	1	1	1	1	-	1	1	1	1	1	1	0	1	-	1	1	1	1	1	1	1	1	1	1	1	1	1	1	1
4293353	TGCAGTTGCGCCTGATCTGGCCGCTGGCCCCTGTGAGGGGGGCGATGTTGCTCATCTTGATCATGGCGG	1	1	1	-	1	1	1	1	1	1	-	1	1	1	1	1	1	1	-	1	1	1	1	1	1	1	1	1	1	1	1	1	1	1	1	1	1	1	1	1	1	1	1	1	1	1	1	1
4295301	TGCAGGGCAATCCCGGCCTCTGCGGGTGGAAGCTCCTCGCGCCGTGCCACGCCGCCGAGATCGGAAGAG	1	1	1	1	1	1	1	1	1	1	1	1	1	1	1	1	1	1	1	-	1	1	1	-	1	1	1	-	1	1	1	-	1	1	1	-	1	1	1	-	1	1	1	1	1	1	1	1
4277757	TGCAGTAGTCGCATGGCGCAGTCGTCATCACGTTGCCGCTGTCGTCCTCCTCCTGGTAGACGCAGCGGT	1	1	1	1	1	1	1	1	1	1	-	-	1	1	1	1	1	1	-	1	1	1	1	1	1	1	1	-	1	1	1	-	1	1	1	-	1	1	1	1	1	1	1	1	1	1	1	1
4276842	TGCAGCTGGCATGATCGGCCGATCCATCCTCGTCTCCCTCCTCCGAGATCGGAAGAGCGGTTCAGCAGG	1	1	1	1	1	1	1	1	1	1	1	1	-	1	1	-	1	1	1	1	1	1	1	1	1	1	1	1	1	1	1	1	1	1	1	1	1	1	1	1	1	1	1	1	1	1	1	1
4278765	TGCAGCTAGTCTTCTCGTTGTGGCAACGAGCGATGAGGAGAAAGCCGAGATCGGAAGAGCGGTTCAGCA	1	-	1	1	1	-	1	1	1	1	1	1	1	1	1	1	1	1	1	1	1	1	1	1	1	1	1	1	-	1	0	1	1	1	1	1	1	1	1	1	1	1	1	1	1	1	1	1
4289703	TGCAGGAAGCGCTTCGCGAACATCGGGGACGGGGCGGTTCGATGCCGAGATCGGAAGAGCGGTTCAGCA	1	1	1	1	1	1	1	1	1	1	1	1	1	1	1	1	1	1	1	1	1	1	1	1	1	1	1	1	-	1	1	1	1	1	1	1	1	1	1	1	1	1	1	1	1	1	1	1
4274057	TGCAGGAACAAGGGCGTGTTGCCAGGAAGGCTTGGAGCGCCGCTCTCCGAGATCGGAAGAGCGGTTCAG	1	-	1	-	1	1	1	1	1	1	1	1	1	1	1	1	1	1	1	1	1	-	1	1	1	1	1	-	1	1	1	1	1	1	1	1	1	-	1	-	1	1	-	1	1	1	1	-
4268906	TGCAGGCCATCAAGGGGGACCTGTCCGACCCCCGCGGCTTCCTCCGCTCCTGGAACGCCACCGAGATCG	1	-	-	1	1	1	1	1	-	1	1	1	1	1	1	1	1	1	0	1	1	1	1	1	-	1	1	1	1	1	1	1	1	1	1	1	1	1	1	1	1	1	1	-	1	1	1	1
4293845	TGCAGCATGGCCGGAAACAGCTTGGTGTTGTAACCCGCCCGAGATCGGAAGAGCGGTTCAGCAGGAATG	1	1	1	1	1	1	1	1	1	1	1	1	1	-	1	1	-	1	1	-	1	1	1	1	1	1	1	1	1	1	1	1	1	1	1	-	1	1	1	1	1	1	1	1	1	1	1	1
4276519	TGCAGGCCTACTTCAACGCCTACTACGCGTCCATCGGGGTGGCCTTCACGGTCGCCGTCACCGTGATCG	1	-	1	1	0	1	1	1	1	1	1	1	1	1	1	1	1	1	1	1	1	1	1	1	1	1	1	1	1	1	1	-	1	-	1	1	1	-	1	1	1	1	1	1	-	-	1	1
4291402	TGCAGCCGAGACATCACGGCCTGTACTGTGGTTGTGCTCCTCCCGAGATCGGAAGAGCGGTTCAGCAGG	-	1	1	1	1	1	1	1	1	1	1	1	1	1	1	1	-	1	0	1	-	1	1	1	-	1	1	1	-	1	1	1	1	1	1	1	1	-	1	1	1	1	1	1	-	1	1	1
4284468	TGCAGGCGAAGACGCCGACGCGAGATCCAGGAGGCGAAGCCCCGAGATCGGAAGAGCGGTTCAGCAGGA	1	-	1	1	1	1	-	1	1	1	1	1	1	1	1	1	1	1	1	-	1	-	1	1	1	1	1	-	-	-	1	1	1	1	1	1	-	1	1	1	1	-	1	1	1	0	1	1
4276879	TGCAGACGCAGAACGTGGTGGTGCCCGTGATGCTCAGCTCCGAGATCGGAAGAGCGGTTCAGCAGGAAT	-	-	1	1	1	1	1	1	1	1	1	1	1	-	1	1	1	1	1	1	1	1	1	1	1	1	1	1	1	1	-	1	1	1	1	1	1	1	-	1	-	1	1	1	1	0	-	1
4303419	TGCAGAGAGCACGTCCATGGTGATGAAGAACGCGCCGCCTGCGTCCACGGCGGTGCCCAGCACGGAGGA	1	1	1	1	1	1	1	1	1	1	1	1	1	1	1	1	1	1	-	0	1	1	1	1	1	1	1	1	1	1	1	1	1	1	1	-	1	1	1	1	1	-	1	1	1	1	-	1
4289579	TGCAGCCTGCGCTGGAGCTGCTGGTTGGCGGCGCGCAGCTTCTTGACCTCCTCCTCCAGGAACGCGGCG	1	1	1	1	1	1	1	1	1	-	1	1	1	-	1	-	1	1	1	1	1	1	1	1	1	1	-	1	1	1	-	1	1	1	1	0	1	1	1	1	1	1	1	1	1	-	1	1
4278627	TGCAGAAAGAACATGAAAGATGAAACCCTTGTCACCTCATTTTCAGGTAAGCCCGAGATCGGAAGAGCG	1	-	1	1	1	1	1	1	1	1	1	-	1	1	1	1	1	1	1	1	1	1	1	1	1	1	1	1	1	1	1	-	1	1	1	1	1	1	1	1	1	1	1	1	1	1	1	-
4264607	TGCAGGTGCTGCCATGCTCACTAACACTGTTTTCTGGGGCATCATTTGCCCGAGATCGGAAGAGCGGTT	1	-	1	1	1	1	1	1	1	1	1	-	1	1	1	1	1	1	1	1	1	1	1	1	-	1	1	1	1	1	1	1	1	1	1	1	1	1	-	1	1	1	1	-	1	0	1	-
4288261	TGCAGCAACTTGGCAGCAGCGAGGACCCATAAGGTGCCATAGATTGCTTTCTTGCCGAGATCGGAAGAG	1	1	1	1	1	1	1	1	1	1	-	1	1	1	1	1	1	1	1	-	1	1	1	1	1	1	1	1	-	1	1	1	1	1	-	1	-	1	1	1	1	1	1	1	-	1	1	-
4303077	TGCAGCGAGTCTACGGTTGACTTCTGCCCTCGATCCTTAGGATCACGCGGCGCAGGAGCGTACTGCATA	1	1	1	1	1	1	1	1	1	1	1	1	1	1	1	1	1	1	1	1	1	1	1	1	1	1	1	1	1	1	1	1	1	1	1	1	1	1	1	1	1	1	1	1	1	-	1	1
4296089	TGCAGTACTACGTCCCCCTCTTCGGCTCCTTCGAGAACCTCCTCCAGGCGCTCAAGTGCAACTCCTACC	1	1	1	1	1	1	-	1	1	1	1	1	1	1	1	1	1	1	1	1	1	1	1	1	1	1	1	1	1	1	1	1	1	1	-	1	1	1	-	1	1	1	1	-	1	1	1	1
4277117	TGCAGCGCGCGCCGGGGCGCTCCATCTGGTCGAGCAGGAACCTGGCCTCCTTGAACCGAGATCGGAAGA	1	1	1	1	1	1	1	1	1	1	1	-	1	1	1	1	1	1	1	-	1	-	1	1	-	1	1	1	1	1	1	1	1	-	-	0	1	1	1	1	1	1	-	1	1	1	1	1
4327467	TGCAGGGCCGTGTCGACGGCCATCTGGCGGTAGATGACGGAGAGGTTGTTCTCCTTCACGCAGGCGTCG	1	-	-	1	1	1	1	1	1	1	-	-	1	1	1	1	1	1	1	1	1	-	1	1	1	1	1	1	1	1	1	1	1	1	1	1	1	-	1	1	1	1	1	1	1	-	1	1
4267025	TGCAGCTGCTCATCCGCCACTTCTCCCTGTGCAAGAGCCGCGCCAGCTGCCCCCGAGATCGGAAGAGCG	1	1	1	1	-	1	1	1	1	-	1	1	1	1	1	1	-	1	-	1	1	1	1	1	1	-	1	1	1	1	0	1	1	1	1	1	1	1	1	1	1	1	1	-	-	1	1	1
4273729	TGCAGTTGGAAGACGTAGCGCACCCCGTCTGGAACTTCCACCCTCCGACGGAAGTCGTCGGCGAGGAAG	1	-	1	1	-	1	1	1	1	1	1	1	-	1	1	1	1	1	1	1	1	1	1	-	1	1	1	1	1	1	1	1	1	1	1	1	1	1	1	1	1	1	1	1	-	1	-	1
4328073	TGCAGGAGCTTGTTGTGTGCCGCGAGCTCAGCTTGACACAGCGTGTCGATATCGTCGCGCCGAGATCGG	1	1	1	1	1	-	1	1	1	1	1	-	1	1	1	1	1	1	1	1	1	1	1	1	1	1	1	-	1	1	-	1	1	1	-	-	1	1	1	1	1	1	1	1	1	1	1	1
4295961	TGCAGTATGGTGAGAGCGTCCAGCTTCCCGCGGTTGAAGTCGTCGGGGATGTCATCGTCGATGAACGGG	1	-	1	1	1	1	1	1	1	1	1	-	1	1	1	1	1	1	-	1	1	1	1	1	1	-	1	1	1	1	1	1	1	1	-	-	1	-	1	1	1	1	1	1	1	0	1	1
4281797	TGCAGGCGGCGGAGGAAATGCCACGCCGAGACGGCCATGTCCTTCGGGTCCCTGCATACGTAGACAACC	1	1	1	1	1	1	1	1	1	1	1	1	1	1	1	1	1	1	1	1	1	1	1	1	1	1	1	1	1	1	1	0	1	1	1	1	1	1	1	1	1	1	1	1	1	1	1	1
4285228	TGCAGCAGGAGCAGCCGCACGCGGTGCCGCACTTGCAGGTGGTGCAGTCGCAGCCGCCGAGATCGGAAG	1	1	1	1	-	1	1	1	1	1	1	1	1	1	1	1	1	1	1	1	1	1	1	1	1	1	1	1	1	1	1	1	1	1	0	1	1	1	1	-	1	-	1	1	1	1	1	1
4266600	TGCAGGGGATGAAGATCAAGCAGATCGCCTGCGGTGACAGCCACTGCCTCGCCGTCACCGTCACCGAGA	1	-	1	1	-	1	1	1	1	1	1	-	1	1	1	1	1	1	1	1	1	1	1	1	-	1	1	1	-	1	1	1	1	1	-	1	1	1	1	1	1	1	1	1	1	1	1	1
4282201	TGCAGACCTTCTTCGACATGGTGGACAAGGACGCCGACGGCAGGATCACCGAGGCGGAGGTCGCGCAGA	1	1	1	1	1	1	1	1	1	1	1	1	1	1	1	1	1	1	1	1	1	1	1	1	1	1	-	1	1	1	1	1	1	1	1	1	1	1	1	1	1	1	1	1	1	-	1	1
4281865	TGCAGGTCAGTGACCTTGGTGTGGCGGCGCTATGTGGGCTAGAGGTCCTGTACCTTGCCAAGGCGCCGA	1	1	1	1	1	1	1	1	1	1	1	1	1	1	1	1	1	1	1	0	1	1	-	-	1	1	-	1	1	1	1	-	1	1	1	1	1	1	1	1	1	-	1	-	1	1	1	1
4271224	TGCAGCTTCACCATGATCACCTGCTCGTCCGACAACTTCGTCACCGAGATCGGAAGAGCGGTTCAGCAG	1	-	1	1	-	1	1	1	1	1	1	-	1	1	1	1	1	1	1	1	1	1	1	-	1	1	1	1	1	-	1	1	1	1	1	1	1	1	1	1	1	1	1	1	-	-	1	1
4328406	TGCAGTAATCGCCGAACGGAGTGACTCACGATGTCTTAAACAATTAATTACCGAGATCGGAAGAGCGGT	1	-	1	1	1	1	1	1	1	1	1	-	1	1	1	1	1	1	1	-	1	1	1	-	1	-	1	-	1	1	1	-	-	1	1	-	1	1	1	1	1	1	-	-	1	1	1	1
4294329	TGCAGCAGCTGGAGGAACTTGGTGAACTGCCCGGCCTTGGTCAGCACCGCCTTGATCGTCTTCGGGGCA	1	1	1	-	1	1	1	1	1	-	1	1	1	1	1	1	1	1	1	1	1	-	1	-	-	1	1	-	-	1	-	1	1	1	1	-	-	1	1	1	1	1	1	1	1	1	0	1
4318359	TGCAGGCGCTGATCCGCGAGCTCAGCTCCGACACAGCCGAGATCGGAAGAGCGGTTCAGCAGGAATGCC	1	1	1	1	1	1	1	1	-	1	-	1	1	1	1	1	-	1	1	-	1	1	1	1	1	1	1	1	-	1	1	1	1	1	1	1	1	1	1	1	1	1	-	1	1	1	1	-
4292961	TGCAGAAGCAGCACAACCCGCGCGCGTCAGGCCACCCTCTGCAAACGGAACGAGGAGACGACGACGAGC	1	1	1	1	1	1	1	1	1	-	1	1	1	1	1	-	1	-	1	1	1	1	1	1	1	1	1	1	1	1	0	-	1	1	1	1	1	1	1	1	1	1	1	1	1	1	1	1
4299961	TGCAGAACATCTACCTGTACGAGAACGCGCTGTCGGGCTCCATCCCGAGATCGGAAGAGCGGTTCAGCA	1	1	1	-	1	1	1	1	1	1	1	1	-	1	1	1	1	1	1	-	1	1	1	1	1	1	-	1	1	-	1	1	1	1	1	1	1	1	1	1	1	1	1	1	1	1	0	1
4271306	TGCAGGCCGCGCCGCCCTCGCCTCGGCGCGAGATCCCCGAGATCGGAAGAGCGGTTCAGCAGGAATGCC	-	-	1	1	1	1	-	1	1	1	1	1	1	-	1	1	1	1	-	1	1	1	1	1	1	1	1	1	1	1	0	1	1	1	1	1	1	1	1	1	1	-	1	-	1	1	1	1
4286666	TGCAGGTTCCCAGGCCACGATTTCTGGCCGTCAATTCTTGACCGAGATCGGAAGAGCGGTTCAGCAGGA	-	1	1	1	1	1	-	1	1	1	1	1	1	1	1	-	1	1	1	1	1	1	-	1	1	1	1	1	1	1	1	1	1	1	1	1	1	1	1	1	1	1	1	1	1	-	1	-
4280095	TGCAGGACGGCCGCCTGGAACAGGTCCCGCACCCTCTCCGAGATCGGAAGAGCGGTTCAGCAGGAATGC	1	1	1	1	1	1	1	1	1	1	1	1	1	1	1	1	1	1	0	1	1	1	1	1	-	1	-	1	1	-	-	-	-	1	1	1	1	1	1	1	1	1	1	-	-	1	1	1
4280078	TGCAGAAGATCGAGACGATGGCCATCGAGGCGCTCAAGGTGCAGGCCGAGATCGGAAGAGCGGTTCAGC	1	1	1	1	1	1	1	1	1	1	1	1	1	1	1	1	1	1	0	1	1	1	1	1	1	1	1	-	1	1	1	1	1	1	-	1	1	1	1	1	1	1	-	1	1	1	1	1
4292120	TGCAGCAACTGCGGGGACGGCTTCTCGCAGTGGTGGGGCACCTGCCGCGGCTGCCAGGCCGTGGGGACC	1	1	1	1	1	1	1	1	1	1	1	1	1	1	1	1	1	1	1	-	1	1	1	1	1	1	1	-	1	1	1	1	1	1	1	0	1	1	1	1	1	1	-	1	1	1	1	1
4266644	TGCAGGTTATTGACTCTGGTGAGAGTTATAGTGGTTATTCTATTCTTCACATGGCGCATGAGGCACCGA	-	1	1	1	1	1	1	1	1	1	1	-	1	1	1	1	1	1	-	-	1	1	1	1	1	1	1	1	1	1	-	1	1	1	1	1	1	1	1	1	1	1	1	1	1	1	1	1
4271568	TGCAGGGAGCTGCTCCCTGGGGATGATCCCAAGCTCGCCGAGATCGGAAGAGCGGTTCAGCAGGAATGC	1	1	1	-	1	1	1	1	1	1	1	1	1	1	1	1	1	-	-	1	1	1	1	1	0	1	1	1	1	1	1	1	1	-	1	1	-	1	1	1	1	-	1	1	1	1	1	1
4273430	TGCAGGTCGGCGATGCGTGTGTGTTCGAGCTGGTGTCCGAGATCGGAAGAGCGGTTCAGCAGGAATGCC	1	-	1	1	1	1	1	1	1	1	1	1	1	1	1	1	-	-	1	-	1	1	1	1	1	1	1	-	1	-	-	1	1	1	1	-	1	-	-	1	1	1	-	-	1	0	-	1
4290688	TGCAGCGCCGAACAGATCGCTCGATCCTGGAGTTTTCGTGGGAAGCTGGCTGCTGGAACCGAGATCGGA	1	-	1	1	1	1	1	1	1	1	1	-	1	1	-	1	1	1	1	1	1	1	1	1	1	-	1	1	-	1	1	1	-	1	1	1	1	-	1	1	1	1	1	-	1	1	1	1
4291994	TGCAGCGCCATTGTTTGATCTCGAGGAGATATCATGTGCCGTAAACAAGGGAAAGGAATCTCCCGAGAT	1	1	1	1	1	1	1	1	1	1	1	-	1	1	1	1	1	1	1	1	1	1	1	1	1	1	1	1	1	1	1	1	-	1	1	0	1	1	1	1	1	1	1	1	1	-	-	1
4270055	TGCAGACTCTATTGGCGATGAACCAGGTGGCGGAGCACATGGTCCTCGCCGAGATCGGAAGAGCGGTTC	1	1	1	1	1	1	1	1	1	1	1	1	1	1	1	1	1	1	1	-	1	1	1	-	1	1	1	-	1	-	1	1	1	1	1	1	1	1	1	-	1	-	1	1	1	-	-	1
4281546	TGCAGCCTGCTGATGATGCAGTGAGTGAATCGATCGATCAGAAAGGCAAAGGGGGGCAACCTAGTAGGG	1	1	1	1	1	1	1	1	1	1	-	-	1	1	1	1	1	1	1	1	1	1	1	1	1	1	1	1	1	1	1	1	1	1	-	1	1	1	1	1	1	1	1	1	1	0	1	1
4323826	TGCAGCTCCCCATGGAATCATGTTGCTGATCTACCTTGTCTCAATAACAGCGCTAGTCAGATACACCAG	1	-	1	1	1	1	1	1	1	1	1	-	1	1	1	1	-	1	1	1	1	1	1	1	-	1	1	1	1	1	1	1	1	1	1	1	1	1	1	1	1	1	1	1	-	-	1	1
4289123	TGCAGCCGGCAGAAGAACGCGCCCTTACCCTGCGAGACCATGACGGCGTCAGGCGACCGAGATCGGAAG	1	-	1	1	1	-	1	1	1	1	1	1	1	1	1	1	1	1	1	1	1	1	1	-	1	1	1	1	1	1	1	1	-	1	1	1	1	1	1	1	1	1	1	1	1	0	1	1
4280885	TGCAGCGCGCGCTCCACCTGCGCCATGTCCACCTCCTCCCCGAGATCGGAAGAGCGGTTCAGCAGGAAT	1	-	1	1	1	1	1	1	1	1	-	1	-	1	-	1	1	1	1	1	1	1	1	1	1	1	1	-	1	1	1	1	1	1	1	1	1	-	1	1	-	1	1	1	1	1	1	-
4300095	TGCAGCAGGTCGGGATACGCGCGCGGTCCGCGCTCGTCGCCGTCGTGTACGAGAAAGGGCTGGCCCTCT	1	-	1	1	1	1	1	1	1	1	1	1	1	1	1	1	1	1	1	1	1	1	1	1	-	1	1	-	1	1	1	1	1	1	0	1	1	1	1	1	1	1	-	1	1	1	1	1
4303827	TGCAGCACGAGCTCGTCCAGGCCGCCCCTGACCATGGCCGAGATCGGAAGAGCGGTTCAGCAGGAATGC	-	-	1	-	1	-	1	1	1	1	1	1	1	-	1	1	1	1	-	1	-	1	1	1	-	1	1	1	1	1	1	1	1	1	1	1	1	1	1	1	1	1	1	1	1	1	1	1
4283160	TGCAGGACCAGATCACGTACAAGGTTGGCACGCACTACGCCGACTGCCCCAGCTTCCGAGATCGGAAGA	1	1	1	1	1	1	1	1	1	1	1	1	1	1	1	1	1	1	-	1	1	1	1	-	1	1	1	1	1	1	1	1	1	1	1	1	1	1	1	1	1	1	1	1	-	1	1	-
4298261	TGCAGAGATGAGCGTCTGCACTACATTCTTCATACCGAGATCGGAAGAGCGGTTCAGCAGGAATGCCGA	-	-	1	1	1	1	1	1	1	1	1	1	1	1	1	1	1	1	-	1	1	1	1	-	1	1	1	1	1	1	1	1	1	1	1	1	1	-	-	-	1	-	1	1	1	-	1	-
4272266	TGCAGCTTAAATTATCTTCCGAGAGATCCTATCACCACCCGAGATCGGAAGAGCGGTTCAGCAGGAATG	1	1	1	1	1	1	1	1	1	1	1	1	-	1	1	1	1	1	1	1	1	1	1	-	1	1	1	1	1	1	1	1	1	1	1	1	1	1	1	1	1	1	1	1	1	1	1	-
4285105	TGCAGCATGCTACCTAGGATGGAGCCTAAAGGATAATCCTTGGGCATTGGCAGCATGGTGAGGCACTGG	1	1	1	1	-	1	1	1	1	1	1	-	1	1	1	1	1	1	-	1	1	1	1	1	1	1	1	1	1	1	-	1	1	1	1	-	1	1	1	1	1	1	1	1	1	-	1	1
4278537	TGCAGACGTTCAACGGCACGTACCTGAACACGACGTTCCCGAGATCGGAAGAGCGGTTCAGCAGGAATG	1	-	1	1	1	1	-	1	-	-	1	1	1	1	1	1	1	1	1	1	1	1	1	1	1	1	1	1	1	1	1	1	1	1	1	1	1	-	1	1	1	1	-	1	1	1	-	1
4268043	TGCAGGAGGACGATTGCTCGGTGGTTGTCTCGTCCTAGCTCTCTTCTTCAACTCGTGTCGATCGGCCCG	1	-	1	1	1	1	1	1	1	1	1	1	1	1	1	1	1	1	-	1	1	1	1	1	1	1	1	1	1	1	0	-	1	1	1	-	1	1	1	1	1	1	1	1	1	1	1	1
4265225	TGCAGCACCACCTTCGGGTGCCGGCCGCTCCTGCGGAACTCCAGGGACCGCGTCAGGCTGCACGTTACG	1	1	1	1	1	1	1	1	-	1	1	1	1	1	1	1	1	1	1	-	1	1	1	1	-	1	1	1	1	1	1	1	1	1	1	1	1	1	1	1	1	1	1	1	1	1	1	1
4282193	TGCAGATCGGTCGTAGCTTTCGTGTGAGAAAGGATGACATGCCACTATCATCACTAAACGGGTGTCGTT	1	1	1	1	-	1	1	1	1	1	1	1	1	1	1	1	1	1	1	1	1	1	1	1	1	1	1	1	1	1	-	1	1	1	1	-	1	-	1	1	1	1	1	1	1	-	1	1
4317449	TGCAGCGCCAGGGGCTGCGCTGCCGACTACACTGCCGACGACCTCCCTCCGAGATCGGAAGAGCGGTTC	1	-	1	1	1	-	1	1	1	1	1	1	1	-	-	1	1	1	1	1	1	1	1	1	-	1	1	1	1	-	1	1	1	1	1	1	1	1	1	1	1	1	-	1	1	1	1	1
4279581	TGCAGAGCAGGAGGCCGGCACGGACCCCGCCAAGATCCTGCGGGAGGTCACGGACAACCTGGGCAGGCA	1	1	1	-	0	1	1	1	1	1	1	1	1	1	1	1	1	1	1	1	1	1	1	1	-	1	1	-	1	-	1	-	1	1	1	1	1	1	1	1	1	1	1	1	1	-	1	1
4279898	TGCAGTTCCGTGGAGTTGTGTGATCAACAACTTCTTCTAGATGACAGCCGAGATCGGAAGAGCGGTTCA	1	1	1	1	1	1	1	-	-	1	-	1	1	1	1	1	0	1	1	1	1	1	1	-	1	1	1	-	1	1	1	1	1	1	-	-	1	1	1	1	1	1	-	1	-	1	-	1
4272001	TGCAGCATGCATGTGACTGCACACTATGCCAAGAAGCCCGCGCGTATCGACAACGCCCGAGATCGGAAG	-	1	1	1	-	1	1	1	1	1	1	1	1	1	-	1	1	1	1	1	1	1	1	-	1	1	1	1	1	1	1	-	1	1	1	1	1	1	1	1	1	-	1	1	1	1	1	-
4301749	TGCAGCGAGACTCGGATTTGGCTGCCCGCGGCACAGAACATGGAAACGAATCAGGGGAAAGTGAAATCG	1	-	1	1	-	1	1	1	1	1	1	1	1	1	1	1	1	1	-	1	1	1	1	1	1	1	1	1	1	1	1	1	1	-	-	-	1	-	1	1	1	1	-	1	1	-	1	1
4263279	TGCAGCGAATTATCATACCCTTGATTGACACCATCTTCTCAATATCTGCAACAAAAACAAATAGAACAT	1	1	-	1	1	1	1	1	1	1	1	-	-	1	1	1	1	1	1	1	1	1	1	1	-	1	1	1	1	1	1	1	1	1	1	-	1	-	1	1	1	1	1	1	-	1	-	1
4290615	TGCAGAACATCCAGCACGCTCACGTTGCCCACACGCAGCGCCTGCCGAGATCGGAAGAGCGGTTCAGCA	-	1	1	1	-	1	1	1	1	1	1	1	1	1	1	1	1	1	-	1	1	1	1	1	1	1	1	1	-	1	1	1	1	1	1	1	1	1	1	1	1	-	1	-	1	1	1	1
4290939	TGCAGCTACCAGTCCGACGCCAGAATATGGTACGACTTCTGCTTCATGCGGTACGACAACACAGACTTC	1	1	1	1	-	1	1	1	1	1	1	1	1	1	1	1	1	1	1	1	1	1	1	1	-	1	1	1	1	1	-	-	1	1	1	-	1	1	1	1	1	1	1	1	1	1	1	1
4281627	TGCAGGATTATTGTGCCCGACAGCACGAGCACCGCACCCAGGAGGCACAGGCAGCCGACGACCCAGGCT	-	-	1	1	1	1	1	1	1	1	-	1	1	1	1	1	1	-	-	1	1	1	1	1	1	1	1	1	1	1	1	1	1	1	1	1	1	1	1	1	1	1	1	1	1	1	-	1
4300902	TGCAGTCCTGTTGTATCGGCCGCCTATTGTCGACGCGCAGAGTCATGTTCGATTCCGGGAAGATGACCG	1	1	1	1	-	1	1	1	1	1	1	-	1	1	1	-	1	1	1	1	1	1	1	1	1	1	1	1	1	-	-	1	1	1	1	1	1	1	1	1	1	1	1	1	1	-	1	1
4271056	TGCAGTACTAGTGAGGTCCAAACTTAAGCAGACTTGGGTGATAGCCGAGGGGGCCTATGGTATACATTA	1	-	1	1	-	1	1	1	1	1	1	1	-	1	1	1	-	1	1	-	1	1	1	1	1	1	1	1	1	1	1	1	1	1	-	-	1	1	1	1	1	1	1	1	-	1	1	1
4272675	TGCAGCGCGCGCTCCACCTGCGCCATGTCCACCTCCTCCCCGGCCAGCCGCCGAGATCGGAAGAGCGGT	1	1	1	1	1	1	1	1	1	1	1	1	1	1	-	1	1	1	-	1	1	1	1	1	1	1	1	1	1	-	1	1	-	1	-	-	1	1	1	1	1	1	1	1	1	1	-	-
4274368	TGCAGAGCGCGCGCGGGTCACGGGGCAAACGGCACAAAGAAAAATCAGAGCCACGTCGGTACCGAGATC	1	1	1	1	1	1	1	1	1	1	1	1	1	1	1	1	1	1	1	1	1	1	1	1	-	1	1	1	1	1	1	1	1	1	1	1	1	1	1	1	1	1	1	1	-	-	0	1
4272285	TGCAGGTCCTCGAACAGGTCGCGCTTGGCCGGGTCGTCCAGGTAGTAGCCGAAGGCGTACGTCCACCGC	-	-	1	1	1	1	-	1	1	1	1	1	1	1	1	1	1	1	1	1	1	1	1	1	1	1	1	1	1	1	1	1	1	1	1	1	1	1	1	1	1	1	1	1	1	-	1	1
4300565	TGCAGCCTGGCGCTGGAGGAAGAGCGGGCTCCTCCGTCGACCTGCTCTCCTTCTTCACCAACGCCGCCG	1	1	1	1	1	-	1	1	1	1	1	1	1	1	1	1	1	1	-	1	1	1	1	1	1	1	-	-	1	1	1	-	1	1	1	1	1	1	1	1	1	1	1	1	1	1	1	1
4300145	TGCAGCGACCGTTAGGGTTTCGATGCAGGAGTTGGCGATCTGTTGTACCGAGATCGGAAGAGCGGTTCA	1	1	1	-	1	1	1	1	1	1	1	-	1	1	-	1	1	1	1	1	1	1	1	1	1	1	1	1	1	1	-	1	-	1	1	1	1	1	1	1	1	1	1	1	1	1	1	-
4267811	TGCAGGAGTCGTAGCCGGCCTTGCTGACCTCGACCAAGTTGTGCGCCGAGATCGGAAGAGCGGTTCAGC	1	1	1	1	1	1	1	1	1	1	1	1	1	1	1	1	1	-	1	-	1	1	1	1	1	1	1	1	1	1	1	1	1	1	1	1	-	1	1	1	1	1	1	-	1	1	1	1
4277667	TGCAGGACTTGATGGGGTATACGAGGATGGACGCCACCGTCGCCGCCGAGATCGGAAGAGCGGTTCAGC	1	1	1	1	1	1	1	1	1	1	1	1	1	1	1	1	1	1	-	1	1	1	1	1	1	1	1	-	1	-	1	1	1	1	1	1	1	-	1	-	1	1	1	1	-	1	-	-
4292963	TGCAGGTCAGGCTCGTGGGGATGGTGAGCGGCAAGGCGGAGCGGAACACGGACGTGTCCTTCACCCTCG	1	-	1	1	1	1	1	1	1	1	1	-	1	1	1	1	1	1	-	1	1	1	1	1	1	1	-	1	1	1	1	1	1	1	1	1	1	-	1	1	1	1	1	1	1	1	1	1
4296450	TGCAGGTCAGGGTGAGCATGCGGAAGGTGCGGTACCTGCGGGAGAGCTCAGTCATGTACTCCGAGATCG	1	-	1	1	1	1	1	1	1	1	1	1	1	-	1	1	1	1	1	1	1	1	1	1	1	1	1	1	1	1	1	-	1	1	1	1	1	1	1	1	1	1	1	-	1	1	1	1
4274797	TGCAGTCGCACACCACGGTGCACACCGACTGCGCCGACGAGCCCGAGATCGGAAGAGCGGTTCAGCAGG	1	1	1	1	1	1	1	1	1	1	1	1	-	1	1	1	1	1	-	1	1	1	-	1	1	1	1	1	1	1	1	1	1	1	1	1	1	1	1	1	1	1	1	1	1	1	-	1
4268943	TGCAGCTGCCATCGACGGTAGTAGTCTTCATATGCATCATGCAAAGAACCCGAGATCGGAAGAGCGGTT	1	-	1	1	1	1	1	1	1	1	1	-	-	1	1	1	1	1	1	1	1	1	1	1	1	1	1	1	1	1	-	1	1	1	-	1	1	1	-	1	1	1	1	1	1	1	-	1
4301198	TGCAGCGCCAGTGCCTTCTTGGACTTCGCCGTCGAGTTTGCCGAGATCGGAAGAGCGGTTCAGCAGGAA	1	-	1	-	1	1	1	1	1	1	1	1	1	1	-	1	-	1	1	1	-	1	1	1	1	-	1	1	1	1	1	1	1	1	1	1	1	1	1	1	1	1	1	1	1	1	1	1
4287692	TGCAGGCCGGGCACGCCGTTGGTGAGGATGAAGGAGAGCGCGGAGACGTCGGTGTGCGCCTCCACGCCC	1	1	1	1	1	-	1	-	1	1	1	1	1	1	1	1	1	1	1	1	1	1	1	1	1	1	1	1	1	1	1	1	1	1	1	1	1	1	1	-	1	1	1	1	1	-	1	1
4270979	TGCAGAACAACAACATCACGGGGCGGCTGCCGCCGAGATCAGAAGAGCGGTTCAGCAGGAATGCCGAGA	1	-	1	1	1	1	1	1	1	1	1	1	1	1	1	1	1	1	1	1	1	1	1	1	1	1	1	1	-	-	1	1	1	1	1	1	1	1	1	-	1	1	1	1	-	-	0	-
4302847	TGCAGAACTACCTGCTGAGCAACCTGGCCCCGTTCGACCCCACGGCGCCCGAGATCGGAAGAGCGGTTC	1	-	1	1	1	1	1	1	1	1	1	1	1	1	1	1	1	1	-	1	1	1	1	1	1	1	1	1	1	1	1	1	1	1	-	-	1	1	1	1	1	1	1	1	1	1	-	1
4302715	TGCAGCTGCACGCGCTGTCCCTCTCCCTCGGCCTCTCCCGAGATCGGAAGAGCGGTTCAGCAGGAATGC	1	1	-	1	1	1	-	1	1	1	1	1	1	-	1	1	1	1	1	1	1	1	1	1	1	1	-	1	1	1	0	1	1	1	1	1	1	1	1	1	1	1	-	1	1	1	1	1
4278635	TGCAGGCGGCGGGGAGGCCGAGCGCCCTCGTGACGTTGAGCTTCAAGTCCAGACCGAGATCGGAAGAGC	1	1	1	1	-	1	1	1	1	1	1	1	1	1	1	1	-	1	1	1	1	1	1	1	1	1	1	1	-	1	1	1	1	1	1	0	1	1	1	1	1	1	-	1	1	1	1	1
4285668	TGCAGCTCTCCGCAGGCGACGACTATCCCGCCCCGTGACGCCCGCCCGAGATCGGAAGAGCGGTTCAGC	1	-	1	1	-	1	1	1	1	1	1	1	1	1	1	1	1	1	1	1	1	-	1	1	1	1	1	1	1	1	-	1	1	1	-	1	1	1	1	1	1	1	0	1	1	1	1	-
4292738	TGCAGGATCACAGCACGAAAGGCAGAGGAGATCAGGACCATTACTCGCAGCAGGGTTCGCAGAGCTTCA	1	1	1	1	1	1	1	1	1	1	1	-	-	1	1	1	1	1	-	1	1	1	1	1	1	1	-	1	1	1	-	1	1	1	1	-	1	-	1	1	1	1	1	1	1	1	1	1
4290360	TGCAGGCCAAGCTGGACCCCCGCCACCCCAGTTTTGTCAAGCCCATGACCCAGTCTCATGTCACCGAGA	1	1	-	1	-	1	1	1	1	1	1	1	-	1	1	1	-	1	1	-	1	1	1	1	1	1	1	1	1	1	1	-	1	1	1	1	1	1	1	1	1	1	0	-	-	1	1	1
4269085	TGCAGCTCCTGCCTCGACGAGCCGACGCCGGTGATCCGCACGTGCGCCGAGATCGGAAGAGCGGTTCAG	1	1	1	1	1	-	1	1	1	1	-	1	1	-	1	1	-	-	1	-	1	1	1	1	-	1	1	1	1	1	0	1	1	1	1	1	1	1	1	1	1	1	1	1	1	1	1	1
4301424	TGCAGGTAATGCGGAGGGACGCGTGCGACGACGGTGACCGAGATCGGAAGAGCGGTTCAGCAGGAATGC	-	1	1	1	1	-	-	-	1	1	1	1	-	1	1	1	-	1	1	1	1	1	1	1	1	-	1	1	1	1	1	1	1	1	-	1	1	-	1	1	1	1	1	1	1	-	1	1
4282034	TGCAGGTAGTGCCCAATATGCACGTGGGCTGGTGGTCGCCGAGATCGGAAGAGCGGTTCAGCAGGAATG	1	-	1	1	1	1	1	-	1	1	1	1	1	1	1	1	1	1	-	-	1	1	1	1	-	1	1	1	1	1	1	1	-	1	1	1	1	1	0	-	1	1	1	-	1	1	1	1
4323216	TGCAGCGGGGGATCCCGGCATGCCGCCGAAGCCGCCGAGACCGAGATCGGAAGAGCGGTTCAGCAGGAA	1	1	1	1	1	1	1	-	1	1	1	1	1	1	-	1	1	1	1	1	1	-	1	1	1	1	1	1	1	-	1	1	1	1	1	1	1	1	1	1	1	1	1	-	1	1	1	1
4289588	TGCAGCTCTTCTTCTCCTCCGCCTCGTGGTAGAAGGTGGTCCAGTCGGTGGCCCTGGCGCCCGAGATCG	1	1	1	1	1	1	1	1	1	1	1	1	1	1	1	1	1	1	1	1	1	1	1	1	1	1	1	1	1	1	1	1	1	1	1	1	1	1	1	1	1	1	1	1	1	1	1	1
4297273	TGCAGCCTGCACATGCTTCCGTCGATCATGCCACCATCTACCCGAGATCGGAAGAGCGGTTCAGCAGGA	-	1	1	1	1	1	1	1	1	1	1	1	1	1	1	1	1	1	1	1	1	1	1	1	1	1	1	1	1	1	1	-	1	1	1	1	1	1	-	1	1	1	1	1	1	1	1	-
4302039	TGCAGCTCGACTCCTCCTGCATATATATTGTGCAGGTAAAGAGGGTTAGACTTGACCGACATCTGGAGG	1	-	1	1	-	1	1	1	1	1	1	1	1	1	1	1	1	-	1	1	-	1	1	-	-	1	-	1	1	1	1	1	1	1	1	-	1	1	1	1	1	1	1	1	1	1	1	1
4300147	TGCAGTGCGTGCAGTGGAGTGCTTTCGTGGCTTTGCTCTGCTTCGTTAGTCTTCTGGGCTGGAGTCGGA	1	1	1	1	1	1	1	1	1	1	1	1	1	1	1	1	1	1	-	-	1	1	1	1	1	1	1	1	1	1	1	-	1	1	1	-	1	1	-	1	1	1	1	1	1	-	1	-
4290604	TGCAGCGTGCGAGCCCAGCATGAGCTGGGCGGCATCAGAGCCGTCAATCAGATCAGCATCCCGAGATCG	1	-	1	1	-	1	1	1	1	1	1	1	1	1	1	1	1	1	1	1	1	1	1	-	1	1	1	1	1	1	1	1	1	1	1	1	1	1	1	1	1	1	1	1	1	1	1	1
4277574	TGCAGAGCCACCGGTGGAAGCCCTCGACGGTGAGCCCGCCGCCCTTCTTGAGCAGCCGAGATCGGAAGA	1	1	1	-	1	-	1	-	1	1	1	1	1	1	1	1	1	1	1	1	1	1	1	1	-	1	-	1	1	1	1	1	1	1	1	-	1	1	1	1	1	1	1	-	1	1	1	1
4302071	TGCAGTAGATGGCCTTCTTCATTGTTTGCCCCCTGTCTGCCTCCCTGCACCGAGATCCATCTGCTCCGA	1	1	1	1	1	1	1	1	1	1	1	1	1	1	1	1	1	1	-	1	1	1	1	-	1	1	1	1	1	1	1	1	-	-	-	-	1	1	1	1	1	1	1	1	1	1	0	1
4298326	TGCAGGTGTTGTAGGACTGGCAATGGCAACACTTTCTCTGTCCCGCCATGCCCGAGATCGGAAGAGCGG	1	-	1	1	-	1	1	1	-	1	1	1	1	1	1	1	1	1	1	1	1	1	-	1	1	1	1	1	1	1	1	1	1	1	1	1	1	1	1	1	1	1	1	-	1	1	-	-
4285994	TGCAGGAGCTCCCTGCGGCGCAGCGGGCTGATGCCGTGAGCAGCCTGGTGTACGAGGCCACCGCGCGGA	1	1	1	1	1	1	1	1	1	1	1	1	1	1	1	1	1	1	-	1	1	1	1	-	1	1	1	1	1	1	1	1	1	1	1	-	1	1	1	1	1	1	1	1	1	1	1	1
4304755	TGCAGTGGCCGCACTCATGAGCTCCACATCTGCGCGCATGCACCTGCATGGACCGAGATCGGAAGAGCG	1	-	1	1	-	1	1	1	1	1	1	1	1	1	1	1	1	1	1	1	1	1	1	1	1	1	1	1	1	1	1	1	1	1	-	1	1	1	-	1	1	1	1	1	-	0	-	1
4295605	TGCAGATGGATAGGACTGCGATCCTCGGCGACACCATAGACTACGTGAAGGAGCTAACGGAGCGGATCA	1	1	1	1	1	1	1	1	1	1	1	1	1	1	1	1	-	1	1	1	1	1	1	-	1	1	1	1	1	1	1	1	1	1	1	1	1	1	1	1	1	1	1	1	1	1	1	1
4264776	TGCAGCTAAGCCCCCGAGATCGGAAGAGCGTTTCAGCAGGAATGCCGAGACCGATCTCGTATGCCGTCT	1	1	1	-	1	1	1	1	-	1	1	1	1	-	-	1	1	1	1	1	-	1	1	1	1	1	1	1	1	1	1	1	1	1	1	1	1	1	1	1	1	1	1	1	1	1	1	1
4268078	TGCAGCTACTGGGCCATTGGCCTGCTGTTTTCTACACTCGGCAACTCCGAGATCGGAAGAGCGGTTCAG	1	-	1	1	1	1	1	1	1	-	1	1	-	1	1	1	1	1	1	1	1	1	1	1	1	1	1	1	0	1	1	1	1	1	1	1	1	-	1	1	1	-	1	1	-	-	1	-
4301807	TGCAGCTGCTGGTCCTCCGCGGGCCTCTTGCACGCCTGTTTCTTCGGAAGCTTTGGAAGCGCCGCCGTC	1	-	1	1	1	1	1	1	1	1	1	1	1	1	1	1	1	1	1	1	1	1	1	1	1	1	1	1	1	1	1	1	1	1	1	-	1	1	1	1	1	1	1	1	1	1	1	1
4284075	TGCAGAAGACACAGCAGGTGCGCGCCGCGCAACAGCAGAAGCAGCCACAGCCTCAGAGCCGAGATCGGA	1	1	-	1	1	1	1	1	1	1	1	-	1	1	1	1	1	1	1	1	1	1	1	1	1	1	1	1	1	-	1	1	-	1	1	0	1	1	1	1	1	1	1	1	1	1	1	1
4271859	TGCAGCAGGTCGTCGCAGAGCGCGGCGTCCACGTCGCCGCATGCCCCGCCACCGCCGCCGAGATCGGAA	1	1	1	1	1	1	1	-	1	1	1	1	1	1	1	1	1	1	1	0	1	1	1	1	1	1	1	1	1	1	-	1	1	1	1	1	1	1	1	1	1	1	1	1	1	-	1	-
4289880	TGCAGGAAGGGGGCTGTGAAACGACGTGCGCGGTGCCGTACTGTCGCCGAGATCGGAAGAGCGGTTCAG	1	1	1	1	1	1	-	1	1	1	1	1	-	1	-	-	1	1	1	1	1	1	1	1	1	1	-	1	1	-	1	1	1	1	1	-	1	-	-	1	1	1	1	-	1	1	1	-
4276753	TGCAGGGGACGCTGCCGGAGTCGCTCAAGGACATGCCGTCGCTGAGGTCGCTGGCGCTGGCGTCCAACA	1	-	-	1	-	1	1	1	1	1	1	1	1	1	1	1	1	1	1	1	1	1	1	-	-	1	1	-	1	-	1	1	1	-	1	1	1	1	1	1	1	1	1	1	-	1	1	1
4281492	TGCAGGCGCCGCACTTGGGCTCGTGGACCGAGTGGTACGACACCTTCATGTGCTCCACAAGGTGCTCCA	1	-	1	1	1	1	1	1	1	1	-	-	1	1	1	-	1	1	-	1	1	1	1	1	1	1	1	1	1	1	1	1	1	1	1	1	1	-	1	1	1	1	1	1	1	1	1	-
4277486	TGCAGCTTGCACGGTTGGTCTGCGTCCTCTTTTTTCTTCTTCCGAGATCGGAAGAGCGGTTCAGCAGGA	-	-	1	1	1	1	1	1	1	1	1	1	1	1	1	1	1	1	1	1	1	1	1	1	1	1	1	-	-	1	1	1	1	1	1	1	1	-	1	1	1	1	1	1	-	1	0	1
4282244	TGCAGCTAAGCCCCCGAGTGAGAGGATTGCTCTTCACTCCGAGATCGGAAGAGCGGTTCAGCAGGAATG	1	1	-	-	1	1	1	1	-	1	1	1	1	-	-	1	1	1	1	1	-	1	1	1	1	1	1	1	1	1	1	1	1	1	1	1	1	1	1	1	1	1	1	1	1	1	1	1
4289600	TGCAGCACCTGTCGGCCACGCCGACGTTCATCGCCGCCGTGCAGGCGCAGGCCGAGATCGGAAGAGCGG	1	1	1	-	1	1	1	1	-	-	1	1	1	1	1	1	1	1	-	1	1	1	1	1	1	1	1	1	1	1	1	1	1	1	1	-	1	1	1	1	1	1	1	1	1	1	1	1
4298316	TGCAGATGCTAACGGCAATGAGGAGCCATTCCGTTTTCTGCATTTTGACGTACGAGATAGTCCTCCGAG	1	1	1	1	1	1	1	1	1	1	1	-	1	1	1	1	1	1	-	1	1	1	1	1	-	1	1	1	1	1	1	1	1	1	1	-	1	1	1	1	1	1	1	1	1	1	-	1
4268941	TGCAGCCGACCGGCGCAGGGGGAGAGCAGGGGAAGCCGAGATCGGAAGAGCGGTTCAGCAGGAATGCCG	1	1	1	1	1	-	1	-	1	1	1	1	1	-	1	1	1	-	1	-	1	1	1	1	1	1	1	1	1	1	1	1	1	1	1	1	1	1	1	1	1	1	1	1	1	1	1	1
4282073	TGCAGTAAGCCAGTACCAGTCAGGATTCATGACGGCGAACGTCTCCCACCCGAGATCGGAAGAGCGGTT	1	-	1	1	1	1	1	1	1	1	1	-	1	1	1	1	1	1	1	1	1	1	1	-	-	1	1	1	1	1	1	1	1	1	1	-	1	1	1	1	1	1	-	1	1	0	1	-
4294127	TGCAGGAGGAGGCGGCTCCTGCTGCTGCTTGGGCTCCTCCGAGATCGGAAGAGCGGTTCAGCAGGAATG	1	-	1	1	1	1	1	1	1	1	1	1	1	-	1	1	1	1	1	1	1	1	1	1	1	1	1	1	1	1	1	1	1	1	1	1	1	1	1	-	1	1	-	-	-	-	1	1
4287156	TGCAGCTGTCGTGGAACTACAACTACGGGGCGGCCGGGGAGAGCACCGAGATCGGAAGAGCGGTTCAGC	1	1	1	-	-	1	-	1	1	-	1	1	1	1	1	1	1	1	-	1	1	1	1	1	1	1	1	1	1	1	1	1	1	1	1	1	1	1	1	1	1	1	1	1	1	1	1	1
4304206	TGCAGCCAAGGGGAAGAAGGGCGCGGCCGGGCGCAAGGCCGAGATCGGAAGAGCGGTTCAGCAGGAATG	1	1	1	-	-	1	1	1	1	1	1	1	1	-	1	1	1	1	1	0	1	1	1	1	-	1	1	-	1	1	1	1	1	1	1	1	1	1	1	1	1	-	1	1	1	1	1	1
4269340	TGCAGCCTGAGGGTGGAGGCGACGACGATGGCGAGCACGGCGAAGCATGCCGGGATGAGCCCGAGATCG	1	1	1	1	-	1	1	1	1	1	1	1	1	1	1	1	1	1	0	-	1	1	1	1	1	1	1	1	1	-	-	1	1	-	1	-	1	-	1	1	1	1	1	1	1	1	1	-
4295324	TGCAGCAGAGGAACCGCTGCATGATCATGCCCCCCGTGCCGAGATCGGAAGAGCGGTTCAGCAGGAATG	1	1	1	1	1	-	1	-	1	1	1	1	1	1	1	1	1	1	1	-	1	1	1	-	1	1	1	1	1	1	1	-	1	1	-	1	1	1	-	1	1	1	1	1	1	1	-	1
4266546	TGCAGATGGTCCACACCTCCTGCATTTCCAGGTCACACGTCAGAGGGTCAATGTTACACTCACACCGCA	1	1	1	1	1	1	1	1	1	1	1	-	-	1	1	1	1	1	1	1	1	1	1	1	1	1	1	1	1	1	1	1	1	1	1	0	1	1	1	1	1	1	1	1	1	-	1	1
4272286	TGCAGCACGAGGGTGACGAGCATGTCCGGCTTGATGCTCGGAAAGAACCGAGATCGGAAGAGCGGTTCA	-	1	1	1	-	1	-	1	1	1	1	1	1	1	1	-	1	1	1	1	1	1	1	1	1	1	1	1	1	1	1	1	1	1	1	1	1	-	1	1	1	1	1	-	1	1	1	1
4271629	TGCAGCAAGCATGGCAATGTTTGCCGTTCTGCTGCTGCTGGCAGCGCCGCTGCTTCCACCGAGATCGGA	1	-	1	1	-	1	1	1	1	1	-	1	1	1	1	-	1	1	1	1	1	1	1	1	-	1	1	1	1	1	1	1	1	1	1	-	1	1	-	1	1	1	-	1	1	1	1	1
4294795	TGCAGCCCCACGTCACTGAACGCCACCGTGAGGAAAACCACCGCCGTGAAGATGGCCTGCACGATGTCC	1	1	1	1	-	1	1	1	1	-	-	1	1	1	1	1	1	1	1	1	1	1	1	1	1	1	1	1	-	1	1	1	1	1	1	1	1	1	1	1	1	1	-	1	1	1	1	-
4285278	TGCAGCTGGAAGTGCAGGATGAGGGTGATGCTTTCGCCATCCGATGCCGACCACATGGTACCGTTCATC	1	1	1	1	1	1	1	1	1	1	1	-	1	1	1	1	1	1	1	1	1	1	1	1	1	1	1	-	1	1	1	1	-	1	1	-	1	1	1	1	1	1	1	1	1	-	1	1
4327982	TGCAGGCCGGGACGAGCTCCTCCGCGGCTGCAAACTCGGTGGTGCTCCCCGAGATCGGAAGAGCGGTTC	1	1	1	1	1	1	1	1	1	1	1	1	-	1	1	1	1	1	1	1	1	1	1	1	1	1	1	0	1	1	1	-	1	1	1	1	1	1	1	1	1	1	1	1	1	1	1	1
4301847	TGCAGCTCCCGCTCCCCTACCTGCCACCCCCACTGCCGCCATTACTGCCGCTGCTGTCGCCGCCGCCTC	1	1	1	1	1	1	1	1	1	1	-	-	1	1	1	1	1	1	1	1	1	1	1	-	1	1	1	1	-	1	-	-	1	1	1	1	1	1	1	1	1	1	1	1	1	1	-	-
4282624	TGCAGACGCCAAGTTGCCCGTGCTTTCAGAGATGCGTGGCGCCGAGATCGGAAGAGCGGTTCAGCAGGA	1	-	1	-	1	1	1	1	1	-	1	1	1	1	1	1	1	-	1	1	1	1	1	1	1	1	1	1	1	1	-	1	1	1	1	1	1	1	1	1	1	1	-	1	1	0	1	1
4293894	TGCAGGAAGCCTTCCACCATGGCCTCGTGGCTCACGGGCATGCCGTTGCCCGAGATCGGAAGAGCGGTT	1	1	1	1	1	1	1	1	1	1	1	1	1	1	1	1	1	1	1	1	1	1	1	1	1	1	1	1	1	1	1	1	1	1	1	1	1	1	1	1	1	1	1	1	1	1	1	1
4295652	TGCAGGACCCGAAACTAGTTATTACATTGTGTAACACCTTGACCGAGATCGGAAGAGCGGTTCAGCAGG	1	1	1	1	-	1	1	1	1	1	1	1	1	1	1	1	1	1	1	1	1	1	1	-	1	1	1	1	1	1	1	1	1	1	-	-	1	1	1	1	1	1	1	1	1	1	1	1
4274632	TGCAGCAGCGCCGTGTTGTAGAGCAGCTCGATGCCGTGGAGGCGCGCGTAGTCCACCTTGTTCTTGAGG	1	1	1	1	1	1	1	1	1	-	1	1	1	1	1	1	1	1	-	1	1	1	1	1	1	1	1	1	1	1	1	1	1	1	1	-	1	1	1	1	1	1	1	1	1	1	1	1
4271780	TGCAGGCACAGCAGAATGGAGCAGCGCCTACTTCTCTTGGAGGCATGCAGTCATCGATGCAGGCAAATC	-	1	1	1	1	1	1	1	-	1	1	1	1	1	1	-	1	1	0	1	1	1	1	-	1	-	1	1	1	1	1	1	1	1	1	1	-	1	1	1	1	1	1	1	1	1	1	1
4294757	TGCAGCGGGTCCGTGTCCACGTAGCTAGTGATGGAGTCCGAGATCGGAAGAGCGGTTCAGCAGGAATGC	1	-	1	1	1	1	1	1	1	1	1	1	1	1	-	1	1	-	1	1	1	1	1	1	1	1	1	-	1	1	1	1	1	1	1	0	1	1	1	1	1	1	-	1	1	1	1	1
4274394	TGCAGCAACTTGCTCTCGGTCAGGAAGCAGTGCACACCGAGATCGGAAGAGCGGTTCAGCAGGAATGCC	-	1	1	1	1	1	1	0	1	1	1	1	1	1	1	1	1	1	1	1	1	-	1	-	1	1	1	1	-	1	1	1	1	1	1	1	1	1	-	1	1	1	1	1	1	1	1	1
4292976	TGCAGCAACACGCGCAGCCTACGCACGGGCACGCTCCCGAGATCGGAAGAGCGGTTCAGCAGGAATGCC	1	1	1	1	1	1	-	1	1	1	1	1	1	1	1	1	1	1	1	1	1	1	1	1	1	1	1	1	1	1	1	1	1	1	1	1	1	1	1	1	1	1	1	1	1	1	0	1
4281796	TGCAGCACCCACGCCGTGCTCAGCCCGCCCGCCGTCGACAGGCTCTCCGAGATCGGAAGAGCGGTTCAG	1	1	1	1	1	1	1	1	-	1	1	-	1	1	1	1	1	1	1	-	1	1	1	-	1	1	1	1	-	1	1	1	-	1	1	1	1	1	1	1	1	1	1	1	1	1	1	1
4326169	TGCAGTCCACATCAGTTGCATAGCACACTCCCTTATTGTTGCCATACAAGCAGCAGTAACACAAGTCGC	1	-	1	1	-	1	1	1	1	1	1	-	1	1	1	1	1	1	1	1	1	1	1	1	1	1	1	1	1	1	1	1	1	1	1	-	1	1	1	1	1	1	1	1	1	0	1	-
4268227	TGCAGTACTTCTACGAGCTGGACGTGAGCAACAACAAGCTCGCTCGCTGCGCCTTCCCGAGATCGGAAG	1	1	1	1	1	1	1	1	1	1	1	1	1	-	1	1	-	1	1	1	1	1	1	1	1	1	-	1	1	1	1	1	1	1	1	1	1	1	1	1	1	1	-	1	-	0	1	-
4301966	TGCAGCTTAAGGGCATGGGTGTCGGCCAGTTCGTTGCTTCGCCCGCCCTCGAAGTCGGCGGCTACAGTT	1	-	1	1	1	1	1	1	1	1	1	1	1	1	1	1	1	1	1	1	1	1	1	1	1	1	1	1	1	1	-	1	1	1	1	1	1	1	1	1	1	1	1	1	1	1	1	1
4307572	TGCAGGCTCTCCAGCCACCGCCTGAACAGCGCCGACTCCAGCGCCTTCCTGAAGTCCGCCTCGGGGAGG	1	-	1	1	1	1	1	1	1	1	1	1	1	1	1	1	1	1	1	1	1	1	1	1	-	1	1	1	1	1	-	1	1	1	1	1	1	1	1	1	1	1	1	1	1	1	1	1
4274988	TGCAGAAGCCTCTGGGTCAGCAGTGCAGAGCCCTAGGCCCGAGATCGGAAGAGCGGTTCAGCAGGAATG	1	1	1	1	1	1	1	1	1	1	1	1	1	1	1	1	1	1	1	1	1	1	1	1	1	1	1	1	-	1	1	1	1	1	1	1	1	1	1	1	1	1	1	1	1	1	1	1
4280750	TGCAGCCCGTCGTCTTCCTCCACGGCGGCCCTGGGGCCGGCACGTCGCCGAGATCGGAAGAGCGGTTCA	1	1	1	1	1	1	1	1	1	-	1	1	1	1	1	1	1	1	1	1	1	1	1	1	1	1	-	1	1	1	1	1	1	1	1	1	1	1	1	1	-	1	1	1	1	1	1	1
4283037	TGCAGTCCCCCAGGTATAGCTTATAGCTTACTTGCCTCCGAGATCGGAAGAGCGGTTCAGCAGGAATGC	-	-	1	1	1	1	1	-	1	1	1	1	-	1	1	1	1	1	1	1	1	1	1	1	-	1	1	1	1	-	1	1	1	1	1	-	-	1	1	1	1	-	1	1	-	1	1	1
4309593	TGCAGGTGTCGGGGGGGATGCAAGGGATGGCGGAGATGGAGTCGTTGCTGGCGTCGTAGATGAGATAGC	-	-	1	1	1	1	1	1	1	1	1	1	1	1	1	-	-	1	-	1	1	-	1	1	-	1	1	1	1	1	1	1	1	1	1	1	-	1	1	1	-	1	1	1	1	1	1	1
4293097	TGCAGTTGTGGAGCGTGGCCATGGCTTCCCTGATGGTCGGCCGTGCGGTCGTGTCCGAGATCGGAAGAG	1	-	1	1	1	1	1	1	1	1	1	1	1	1	1	1	-	1	1	1	1	1	-	1	-	0	1	1	1	1	1	1	1	1	1	1	-	1	-	1	1	1	-	1	1	1	1	1
4272985	TGCAGTAGAACCAGAGGGCGAGCTTGACGGCGGTGGCCGAGAGCATGATGGAGTAGAGCCATATGAGCT	-	1	1	1	-	1	1	1	1	1	1	1	1	1	1	1	1	1	1	1	1	1	1	1	1	1	1	1	1	1	1	-	1	1	1	-	1	1	1	1	1	1	1	1	1	-	-	1
4327144	TGCAGGAGGCGCGGGCCCATGTCCCCGGCAGGAGCGTCCGAGATCGGAAGAGCGGTTCAGCAGGAATGC	1	1	1	-	1	1	1	1	-	1	1	1	1	-	-	1	1	1	1	1	1	1	1	1	1	1	1	1	1	1	1	1	1	1	1	1	1	1	1	1	1	1	1	1	1	1	1	-
4304254	TGCAGAACACTAACCGACCGAGGGGAGATCCGATCGGCAATGGCGACGCCGATGCTGCGATCTGCCGTT	1	-	1	1	1	1	1	1	1	1	1	1	1	1	1	1	1	1	1	-	1	1	1	0	-	1	1	1	1	1	1	1	1	1	1	1	1	1	1	1	1	-	1	1	1	1	-	1
4270438	TGCAGGCTAGGGAGAGCAGTGAGCCAGTGACCGTTGCACCCCACAGGCAGACCCCACCCAAGGACCACG	1	1	1	1	-	1	1	1	1	1	1	-	-	1	1	1	-	1	1	1	1	1	1	-	1	1	1	1	1	1	1	1	1	1	1	1	1	1	1	1	1	1	1	1	1	-	1	1
4280215	TGCAGTTATCAGCCATGTCCAGCGGTAGCTCCGCCTCGTCTCCGTTCGCGAGCAGCAGGAGAGCCCCTC	-	-	1	1	1	1	1	1	1	1	1	1	-	1	1	1	1	1	1	1	-	1	1	1	1	1	1	1	1	1	1	1	1	1	1	-	1	1	-	1	1	1	1	1	1	1	1	1
4286910	TGCAGGTAGGGTGCTCTTAGGCTGAAGACTTGTCACCGCCAAAGGCATTCTCCAGAACACCGAGATCGG	-	1	1	1	1	1	-	1	1	1	1	1	1	1	1	1	1	1	1	1	1	1	1	1	1	1	1	1	1	1	1	1	1	1	1	1	1	1	-	1	1	-	1	1	1	1	1	1
4326847	TGCAGCAGCGTAGTAGATCACTCCGAGATCCGAAGAGCGGTTCAGCAGGAATGCCGAGACCGATCTCGT	1	1	1	1	0	1	1	1	-	-	1	1	1	1	1	1	1	1	1	1	1	-	1	1	-	1	1	1	1	1	1	1	1	1	1	1	1	1	-	1	1	1	1	1	1	1	1	1
4302255	TGCAGCGTGCTGCTCGCCCTCATCCTCGTCCTCGCCATCGTCTTCGTCGCGCTCTACTTCACCGTGTTC	1	1	1	1	-	-	1	1	1	1	1	-	1	1	1	1	1	-	-	1	1	1	1	1	1	1	1	-	1	1	1	1	1	1	1	-	1	1	1	1	1	1	-	1	1	0	1	1
4281710	TGCAGTACCTCGCCCTCTCCGGCAACGAGCTGTCCGGGAGGATACCGCCGAGATCGGAAGAGCGGTTCA	-	-	1	1	1	-	1	1	-	-	1	1	1	1	1	1	1	1	1	1	1	1	1	1	1	1	1	1	1	1	1	1	1	1	-	1	1	1	1	1	1	1	1	-	1	1	-	-
4268783	TGCAGCCTTGCGAGCATGTTGCCGGCACAGATCCTGTAGCCGCCACCGAACACCTGGTACGTCCCTGGC	1	1	1	1	1	1	1	1	1	1	-	1	1	1	1	1	1	1	1	1	-	1	1	1	1	-	1	1	1	1	1	1	1	1	1	1	1	1	-	1	1	1	1	1	-	0	1	-
4282547	TGCAGCTCGCGCATACGACGCAGGCCAGCAGCGCACTTCCAGCTGCTAGTGTGCTAGCTTGGCCCATCA	1	1	1	-	1	1	1	-	1	1	1	1	1	1	1	1	1	1	1	1	1	1	1	1	1	1	1	1	1	1	1	1	1	1	1	1	1	-	1	1	1	1	1	1	1	1	1	1
4314937	TGCAGCCCGCCGACGCGGTCGTCCTGGAAGAGCAGGATGAGGCCGCCGAGATCGGAAGAGCGGTTCAGC	-	1	1	1	1	1	1	1	1	1	1	-	1	1	1	1	1	1	-	1	1	1	1	1	1	1	1	1	1	1	1	1	-	1	1	1	1	1	1	-	1	1	0	1	-	1	1	-
4328095	TGCAGATCGGAGCCATGGCCGCTGGGTGTCGGACGAGGAGCAAGAAGAGCCGAGATCGGAAGAGCGGTT	1	1	1	1	1	1	-	1	1	1	1	1	1	1	1	-	1	1	1	1	1	1	1	1	1	1	1	1	1	1	1	1	1	1	-	-	1	1	-	1	1	1	1	-	1	1	1	1
4283129	TGCAGCGGTGGACGGGAGGTCCAGGATGCAGCCGCCGAGATCGGAAGAGCGGTTCAGCAGGAATGCCGA	1	1	1	1	1	1	1	1	1	1	1	1	1	-	-	1	1	1	1	1	1	1	1	1	1	1	1	1	-	1	1	1	1	1	1	1	1	1	1	1	1	1	1	1	1	1	1	-
4281331	TGCAGGGGGTTCAACTTCTTGGCGATCATCGGGCTGATCCTCTGCACGGCGTCGTTCGGCATCAACCTT	1	-	1	1	-	1	1	1	1	1	1	1	1	1	1	1	1	1	1	1	1	1	1	1	-	-	1	1	1	1	1	-	-	-	0	-	1	1	1	-	1	1	1	1	1	1	-	1
4298031	TGCAGGGGCCTGACGCGGTGCCGCCTGAGTACCTGACGCTGTCGCTCACGCCCGCCGAGATCGGAAGAG	1	-	1	1	1	1	1	1	1	1	1	1	1	1	1	1	1	1	1	1	1	1	1	-	1	1	1	1	1	1	-	1	1	1	1	1	1	1	1	-	1	1	1	1	-	1	1	1
4283244	TGCAGCGTAGTTTAGGTGTACATGAGCTATGCTTTTCATGGTATTTGCTGCACTGCCGAGATCGGAAGA	1	1	1	1	1	1	1	1	1	1	-	1	-	1	1	1	-	1	-	1	1	1	1	1	1	1	1	1	1	1	1	1	1	1	1	-	1	1	1	1	1	1	1	1	1	-	1	1
4274417	TGCAGCTGAAGCAGAGGCCCACGACGCCGACGCCGACGCCGAGATCGGAAGAGCGGTTCAGCAGGAATG	1	1	1	1	1	1	1	1	1	1	1	1	1	1	1	1	1	1	1	1	1	1	1	1	1	1	1	1	1	-	1	1	1	1	1	1	1	1	1	1	1	1	1	1	1	1	1	1
4272315	TGCAGGTCCTCGGCGAACACCTCCGAGGTCCACTCCTCCCGAGATCGGAAGAGCGGTTCAGCAGGAATG	1	-	1	1	1	1	1	1	1	1	1	1	1	1	1	1	1	1	1	1	1	1	1	1	1	1	1	1	1	1	1	1	1	1	1	1	1	1	1	1	1	1	1	1	1	1	0	1
4267548	TGCAGGCAAGCAGGATCATCAATGCTTATGAGTCCGAAAGGTTTGTAGAATAGGTCGGTGGTTTGTGTG	1	-	1	1	1	1	1	1	1	1	1	1	1	1	1	1	1	1	1	1	1	1	1	1	-	1	1	1	1	1	1	1	1	1	-	1	1	-	1	1	1	1	1	1	1	1	1	1
4295428	TGCAGGATGTTGGCGGATGTCCACGTGGTGGCGTAGAGACGGCCGCGGAAAAGGAGGATGCTCTGGAGC	1	1	1	1	1	1	1	1	1	1	1	-	1	1	1	1	1	1	1	0	1	1	1	-	1	1	-	1	1	1	1	1	1	1	1	-	1	1	1	1	1	1	1	1	1	-	-	1
4327350	TGCAGCGGGACGAGGACACCGTCGTCCGCCTCCTCCACCCCTTCACCGAGATCGGAAGAGCGGTTCAGC	1	-	1	1	1	-	1	1	1	1	1	1	1	1	-	1	1	1	0	1	1	1	1	1	1	1	-	1	1	1	1	1	-	1	1	1	1	1	-	-	1	1	-	1	1	1	1	1
4288941	TGCAGCAGCGACGCGGAGCAGTGGCCTCCGAAACAGAGGCGAGCGAGCTGCGCCGAGATCGGAAGAGCG	1	1	1	-	1	1	1	1	-	1	1	1	1	1	1	1	1	1	-	1	1	1	1	1	1	1	1	1	1	1	1	1	1	1	1	1	1	1	1	1	1	1	1	1	1	1	1	1
4295639	TGCAGGTGAGGATGACATCTACACTGCATTGCTTTTGTTGATGGTACTGGTTCAGATCGAGCCGAGATC	1	1	1	1	-	1	1	1	1	1	1	1	1	1	1	1	1	1	1	1	1	1	1	1	1	1	1	1	1	1	-	-	1	1	-	1	1	1	1	1	1	-	1	1	1	1	1	1
4292689	TGCAGGTGGAGGGGGTGAGCACCAAGGAGGACGTGTCCTACTACGCCGAGATCGGAAGAGCGGTTCAGC	-	-	1	1	-	1	1	1	1	1	1	1	1	1	1	1	1	1	-	1	1	-	1	1	1	1	1	1	-	-	-	1	1	1	1	1	1	1	1	1	1	1	1	1	1	1	1	1
4280028	TGCAGCCAGCAGTTTGCAGCCGCTTCCAGGCCCCGCCGAGATCGGAAGAGCGGTTCAGCAGGAATGCCG	-	1	1	1	1	1	1	1	1	1	1	1	1	-	1	1	1	1	1	1	-	-	1	1	-	1	-	1	1	1	1	1	1	1	1	1	1	1	1	1	1	1	1	1	1	1	-	1
4270718	TGCAGATGCTTGGATCGTGGATGGGCCATTTGGTAGGCGATAAAAGCCCGAGATCGGAAGAGCGGTTCA	1	-	1	1	1	1	1	1	1	1	1	-	1	1	1	1	1	1	1	1	1	1	-	1	1	1	1	1	-	1	1	1	1	1	-	1	1	1	-	1	1	1	1	1	1	1	0	-
4281460	TGCAGGTCGTAGACGCAGTCGACGATGCGCTTCTGCTCGGCGGTGCTGAACACGCCGGCGTGGAGCTCC	1	-	1	1	1	-	1	1	1	1	-	1	1	1	1	1	1	1	1	1	1	1	1	-	1	1	1	1	1	1	1	1	1	1	1	-	1	-	1	1	1	1	1	1	1	-	1	1
4290577	TGCAGCGACTCCCCGATGGCGTGCGCCTCCCGCAGCCGCATGTCCTCCGAGAGCTCGATGTCGACCTGG	1	1	1	1	1	-	1	1	1	1	1	1	1	1	1	1	1	1	1	1	1	1	1	1	1	1	1	0	1	1	1	1	1	1	1	1	1	1	1	1	1	1	1	1	1	1	1	1
4315804	TGCAGCCCAGAAGGATTTATCTTGTGATGAAAGCAGAGTGCGAGGAGCAGAAGAGAAAATATTTTCAGG	1	-	1	1	-	1	1	1	1	1	1	0	1	1	1	1	1	1	1	1	1	1	1	1	1	1	1	1	1	1	1	1	1	1	1	1	1	1	1	1	1	1	1	1	1	1	-	1
4290304	TGCAGAAGCTGGACCTGAGCTCCAACAATCTCACCGGCGGCATTCCGAGATCGGAAGAGCGGTTCAGCA	1	-	1	-	1	1	-	1	1	1	1	1	1	1	1	1	1	1	1	1	-	1	1	-	1	1	1	1	1	-	-	-	1	1	1	1	1	1	1	1	1	1	1	1	1	1	1	1
4303452	TGCAGCGCCGCCTCCACGATGGCCTCCTCGCAGGCCGAGATCGGAAGAGCGGTTCAGCAGGAATGCCGA	1	1	1	-	1	1	1	-	1	1	1	1	1	1	1	-	1	1	1	1	1	1	1	1	1	1	1	1	1	1	1	-	-	1	1	1	1	1	1	-	1	1	1	1	1	1	1	-
4301248	TGCAGGGACTCAGGCCACTCTCCCGAGGCCGTGTACGAGAAGGTCCTCGCCGTCGCCGAGATCGGAAGA	1	1	-	1	1	1	1	1	1	1	0	1	1	1	1	-	1	1	1	1	1	-	1	1	1	1	1	1	1	1	1	1	1	1	-	1	1	1	1	1	1	1	1	1	-	1	1	1
4282179	TGCAGTGACGATGATCTAACTGTGCTCGTATTCTAACGAGAGATCCAAGTCGCGTATCGGATTCGGAAG	1	1	1	1	1	1	1	1	1	1	1	1	1	1	1	1	-	1	1	1	1	1	1	1	1	-	1	1	1	1	1	1	1	1	-	1	1	1	1	1	1	1	1	1	1	-	1	1
4288864	TGCAGGACGAGGAAGGTGACCACCGCTGCCACGAGCGCAAAGACATAGATGGAGGTCCGCAGTTGCCGG	1	-	1	1	1	1	1	-	-	-	-	1	1	1	1	1	1	1	1	1	1	1	1	1	1	-	1	1	1	1	1	1	1	1	1	1	1	1	1	1	1	1	1	1	1	1	1	1
4276772	TGCAGCGCCATGAGGGGCGGCGGCCGAGATCTGAAGAGCGGTTCAGCAGGAATGCCGAGACCGATCTCG	1	1	1	-	1	-	1	1	1	1	-	1	1	-	1	1	1	1	1	1	1	1	1	1	1	1	-	1	1	1	1	1	1	-	-	1	1	1	1	1	1	1	-	1	1	1	-	1
4327229	TGCAGGCGCAGCTCCGCCGATGACCATGGCGAGGCACGAGGCCATGACGTCGTCGTCCAATTTGGCGCG	1	1	1	1	1	1	1	1	1	1	-	1	1	1	1	1	1	1	1	1	1	1	1	1	1	1	1	1	1	1	1	1	1	1	1	1	1	1	1	1	1	1	1	1	-	1	1	1
4328181	TGCAGTACCTGCGGGGCGAGTCCAGGTTCTCCGACCACCGAGATCGGAAGAGCGGTTCAGCAGGAATGC	-	1	1	1	-	1	1	1	1	1	1	1	1	1	1	1	-	1	-	1	1	1	1	-	1	1	1	1	1	1	1	1	1	1	1	-	1	1	1	-	1	-	1	1	1	1	1	-
4303240	TGCAGGATGGCGCGCTCCAGCGCGGCGCCGACGAGGCCGAGATCGGAAGAGCGGTTCAGCAGGAATGCC	-	1	1	1	1	1	-	1	1	1	1	1	1	1	1	1	1	1	1	-	1	1	1	1	1	1	-	1	1	1	-	1	1	1	1	1	1	1	1	1	1	1	1	1	1	1	1	-
4288212	TGCAGGTTCCTGACAGACCATCCTTCACAGATGCCGAAGGATCAGGAAGATAACGCAAGGTGCCTTTGA	1	1	1	1	-	1	1	1	1	1	1	-	1	1	1	1	1	1	-	1	1	1	-	1	1	1	1	1	1	1	1	1	1	1	1	-	1	1	1	1	1	1	1	1	1	1	1	1
4282264	TGCAGGTACCAGTGCTGTGGGCACGGGCATGGTGGCTGCCGCTGCTGCGCAAGCCCCAACGAGATCCCG	1	1	1	1	1	1	1	1	1	1	1	1	1	1	1	1	1	-	1	1	1	1	1	-	-	1	1	1	1	1	0	1	1	1	1	-	1	1	1	1	1	-	1	1	1	1	1	1
4270944	TGCAGCGGGCGGCTGGTGTCCATCCGCCAGATGGATCCCCAGGAGCGGCGCATCGGCTCCCAGGACCCC	1	1	1	1	1	1	1	0	1	1	1	-	1	1	1	1	1	1	1	1	1	1	1	1	1	1	1	1	1	1	1	1	1	1	-	1	1	1	1	1	1	1	1	1	1	1	-	1
4276353	TGCAGCTGCCGCTTCACCCACTTCACGATGTCCTCGTCCTCGCCGGCGAACATGCCGAGATCGGAAGAG	1	1	1	1	1	1	-	1	1	1	1	1	1	1	1	1	1	1	1	1	1	1	1	1	1	1	1	1	1	1	1	-	1	1	1	1	1	1	1	1	1	1	1	1	1	1	-	1
4281459	TGCAGGATGAGCCAGAGCGCGTAGAAGAAGCAGCTGCCGGTGCAGAGCAGGCAGCCCATGGCACGGTTG	1	-	1	1	1	1	-	-	1	-	1	1	1	1	1	1	1	1	1	0	1	1	1	1	1	1	1	1	1	1	1	-	1	1	1	1	1	1	1	1	1	1	1	1	1	1	1	1
4302350	TGCAGTCGACACGTGGTGCGTTGCGGATCCTGGCTGGCTGCCCGCGTACGTAACATGCATGCATGTCCC	1	-	1	1	-	1	1	1	1	1	-	1	1	1	1	1	1	1	1	1	1	1	1	-	1	1	1	1	1	1	1	1	1	1	1	-	1	1	1	1	1	1	1	1	1	-	1	-
4270631	TGCAGCAATGGCCGCCGCGGTTGGAGCCCGAGCCGGCCCCGATGATGTCGGCCGAGATCGGAAGAGCGG	1	1	1	1	1	1	1	-	1	1	-	1	1	-	1	-	1	1	-	0	1	1	1	1	1	1	1	1	1	1	1	1	1	1	1	1	1	1	1	-	1	1	1	1	1	1	1	1
4304348	TGCAGAAGTCCCCGCACCACGCCCCTCCGTCCGCGGCCGAGATCGGAAGAGCGGTTCAGCAGGAATGCC	1	-	1	1	1	1	1	1	1	1	1	1	1	1	1	1	1	1	1	1	1	1	1	1	1	1	-	1	1	1	-	1	1	1	1	0	1	1	1	1	1	1	1	1	1	1	-	1
4287001	TGCAGCTCCTCTTCACCTCGTCGAACTCCCCGAGCAAATGGAACCTGCAAACAACAGTTTCCTCCGAGA	-	1	1	1	-	1	1	1	1	1	1	1	1	1	1	-	1	-	1	-	-	1	1	1	-	1	1	1	1	1	1	1	1	1	1	1	1	1	-	1	1	1	-	1	1	1	0	1
4296316	TGCAGCACCCCGGCGTGCTCGCCTCCTCCCTCCACGCTCCCGAGATCGGAAGAGCGGTTCAGCAGGAAT	1	1	1	1	1	1	1	1	1	1	1	1	1	1	1	1	1	1	1	1	1	1	1	1	1	1	1	-	1	1	1	1	1	1	1	1	1	-	1	1	1	1	1	1	1	-	1	1
4327764	TGCAGCTACCAGAAGCTATACTTGGGTCAAACATCCCTTCCTCGCACACAAGTCAAGTCAGCATATAAA	1	-	1	1	-	1	1	1	1	1	1	-	1	1	1	1	1	1	-	1	1	1	1	1	1	1	1	1	1	1	1	1	1	1	1	1	1	1	1	1	1	1	1	1	1	0	-	1
4278572	TGCAGCTCCCACCCGCCGCTTCCAAACCTCCACAATCCCAGCCGCAGCACGCGCGGGCTGTGAGATCTC	1	1	1	1	1	1	1	1	1	1	-	1	1	1	1	1	1	1	1	1	1	1	1	1	1	1	1	1	1	1	-	1	1	1	1	1	1	1	1	1	1	1	1	1	1	-	1	-
4264911	TGCAGGGGACCAACATAAATGTGATATTTGCCATCTCTCGAAGCAAATGGTGGTTTTCTTGGCAGCATC	1	-	1	1	1	1	1	1	1	1	1	1	1	1	1	1	1	1	0	1	1	1	1	1	1	-	1	1	1	1	1	1	1	1	1	1	1	-	1	1	1	-	1	1	1	1	-	1
4286179	TGCAGCGACCCGACCTCTTCAGCAACACCACCGCCGGGATCATGTCGCTCGGCCGAGATCGGAAGAGCG	1	-	1	1	1	1	1	1	1	1	1	1	1	1	1	1	1	1	1	1	1	-	1	1	1	1	1	-	1	1	1	-	1	1	1	-	1	1	1	1	1	1	1	1	1	1	1	-
4293555	TGCAGCGCCTCGGCCTTGCACCCGCCGCCCTCCGCCGAGATCGGAAGAGCGGTTCAGCAGGAATGCCGA	1	1	1	1	1	-	1	1	1	1	1	1	1	1	1	1	1	1	-	1	1	1	1	1	1	1	1	1	1	-	1	-	1	1	-	1	1	1	1	1	1	1	1	-	1	1	1	1
4274086	TGCAGGTGCTCGGCCGCGATGGCCGCTGGGCCGACGTCCAGCCCGTGGAGAACGCCATCGTCATCAACA	1	1	1	1	1	1	1	1	1	1	1	1	1	1	1	1	1	1	-	1	1	1	1	1	1	1	1	1	1	1	1	1	1	-	1	-	1	1	1	1	1	1	1	1	1	1	1	1
4283298	TGCAGGCCACCAAGCTGCTCCTGCAACGCAGCGACCTCTTCCCTCTGCTTCTGCGCCTGATCCAGCTGC	1	1	1	1	-	1	1	1	1	-	1	1	1	1	1	1	-	1	1	-	1	1	1	1	1	1	1	1	1	1	0	1	1	1	1	-	1	1	1	1	1	1	-	1	1	1	1	1
4276081	TGCAGGGTCAGTCTCGATAACTTTGAACTCCACGCTTGTCATTCCGCCTCTCACAAGGAAAAGGTCCCC	1	-	1	1	-	1	1	1	1	1	1	1	1	1	1	1	1	1	1	1	1	1	1	1	-	1	1	1	1	1	1	1	-	1	-	1	1	1	1	1	1	1	1	1	1	-	1	1
4304396	TGCAGGCTCTTGAGCTCTGAATCAAAATCTTTCTGCATGGACACCGCGCGGCGGCTGAACTGCTCGTCG	1	1	1	1	-	1	1	1	1	1	1	1	1	1	1	1	1	1	-	1	1	1	1	-	1	1	1	-	1	1	1	-	1	1	1	1	1	1	1	1	1	1	1	1	1	-	-	1
4326588	TGCAGCCACATTGCTGTTTCCTGGCGCCGCCCCACCGCTGCACTTCGTCGCCGAGATCGGAAGAGCGGT	1	1	1	1	1	1	1	-	1	1	-	1	1	1	1	-	1	1	1	0	-	1	-	1	1	1	1	1	1	1	1	1	1	1	1	1	1	1	1	1	1	1	1	1	1	1	1	1
4272116	TGCAGCGGCCTCACCGTTGGTCGGCATCACTATCTAACTCGTCTTTGCCGCGTTCCGAGATCGGAAGAG	1	1	1	1	1	1	1	1	1	1	1	1	1	1	1	1	-	-	1	1	1	1	1	1	1	1	-	1	1	1	1	1	-	1	1	1	1	1	1	1	1	1	1	1	1	1	1	-
4264217	TGCAGCTCCAGTCAGGGAACTCGACCAAGAGCTTCAGCCGCGAGTGCCAGGTCCTGAAGCGCATCCGCC	1	1	1	1	1	1	1	1	1	1	1	-	1	1	1	1	1	1	1	1	1	1	-	1	1	1	1	1	-	1	1	1	1	1	1	1	1	-	-	-	1	1	1	1	1	1	-	1
4298578	TGCAGCAGCAGAAGGGCCTGCTGTCGTCGGACCAGGTGCTCTTCGCCGACCGCCGCTCCCGAGATCGGA	1	-	1	1	-	-	1	1	1	-	-	1	-	1	1	1	1	1	1	1	1	1	1	1	1	1	1	1	1	1	0	1	1	1	1	1	1	1	1	-	-	-	1	1	1	1	1	1
4284789	TGCAGGAGGTGGTCGTGGTGGTGGTGATGCTGCACGCCGGGGGGGAACACGAGCGCGAAGCGCATGGCC	1	1	1	1	1	1	1	-	-	1	1	-	1	1	1	1	-	1	1	-	1	1	1	1	-	-	1	1	1	1	0	-	1	1	1	1	1	1	1	1	1	1	1	1	1	1	1	1
4301401	TGCAGGATGGCGAGGGAGAGGGACACGCTTGCCGCTTACCTGATATCTTCCGAGATCGGAAGAGCGGTT	1	-	1	1	1	1	-	1	1	1	1	1	1	1	-	-	-	1	-	1	1	1	1	-	-	1	1	1	1	1	1	1	1	1	1	1	1	1	-	1	-	1	1	1	1	1	-	1
4327530	TGCAGCGTCACATCGACCCCTCCCTCTACGACGAGGGCGGCGATGCGCTCGCGCCGAGATCGGAAGAGC	1	1	1	1	1	1	1	1	1	1	1	1	1	1	1	1	1	1	1	1	1	1	1	1	1	1	1	1	1	1	1	1	1	1	1	1	1	1	1	1	1	1	-	1	1	1	1	1
4273431	TGCAGCGAGGGCAGCGGAGCTGGCCGTTGGGATTATTCGAATGGCCTCCTTCAGCACCACGTCCGAGAT	1	-	1	1	1	1	1	1	1	1	1	1	1	1	1	1	1	1	1	1	1	1	1	1	1	1	1	-	1	1	1	1	-	1	-	-	1	1	-	1	1	1	-	1	1	1	0	1
4286253	TGCAGCTCATGACAACGAGTTCAGCAAAAACGACCTAATCAGAGACGTGGCGATACTGTACAGAGACGG	-	1	1	1	1	1	1	1	1	1	1	1	1	1	1	1	1	-	1	1	1	1	1	1	1	1	1	1	1	1	1	1	1	1	1	1	1	1	1	-	1	1	1	1	1	1	1	1
4287617	TGCAGGTGCTTGTCGACGTCGGTCAGGACGCAGGAGAAGGAAGGAGAGGTCGGGCGGAAGCCGCTGGGG	1	1	1	1	1	-	1	1	1	1	1	1	1	1	1	1	1	1	-	1	1	1	1	1	1	1	1	1	1	1	1	1	1	1	-	1	1	-	1	1	1	1	1	1	1	1	1	1
4299927	TGCAGCTGCACGGGCCCCGTCCAGTCCTTCTCGGTCGCCGAGATCGGAAGAGCGGTTCAGCAGGAATGC	1	1	1	1	1	1	1	1	-	1	1	1	1	1	1	1	1	1	1	1	1	1	1	1	1	1	1	1	-	1	1	1	1	1	1	1	1	-	1	1	1	1	1	1	1	1	1	1
4282246	TGCAGCTGGATGCATGCATGCACCAACTGTAGCTTGAGGTATTTTCTTCAGACCATAGAAAAACCGAGA	1	-	1	1	1	1	1	1	1	1	1	1	1	1	1	1	-	1	1	1	1	1	1	1	1	1	1	-	1	1	1	1	1	1	1	1	1	1	1	1	1	-	1	1	1	1	1	1
4286613	TGCAGCGCCATGAGCATGCCGGCAGCGACGTCGACGGGGAAGCTCGCCGAGATCGGAAGAGCGGTTCAG	1	-	1	1	-	-	1	-	1	1	1	1	1	1	1	1	1	1	1	1	1	1	1	1	1	1	1	1	1	1	1	-	-	1	1	1	1	1	1	1	1	1	1	1	1	-	1	1
4287309	TGCAGGTGGCGGACCTGCGCGCCGTCACCACCAAGAACCCCGTCGGCCACCAGTCGGAGCGCTACCGCA	1	1	1	1	1	1	1	1	-	-	-	1	1	1	1	1	1	1	1	1	1	1	1	1	1	1	1	1	1	1	1	1	1	1	1	1	1	1	1	1	1	1	1	1	1	1	1	1
4328446	TGCAGGGACGGCCGGGCGAAGCCTCTGATCGTGGACCCGAGATCGGAAGAGCGGTTCAGCAGGAATGCC	1	-	1	1	1	1	-	1	1	1	1	1	1	-	-	1	1	1	1	1	1	1	1	1	1	1	1	1	-	1	1	1	1	1	1	1	1	1	1	1	1	1	1	1	-	1	1	1
4263252	TGCAGGCGCAAAGGTGAGCTCCTCCTCGTCTACGAGAACATGTCAAACGGGAGCCTTGACAAGTACCTG	1	1	1	1	1	1	1	1	1	1	1	1	1	1	1	1	1	1	1	1	1	1	1	1	1	1	1	1	1	1	1	-	1	1	-	1	1	1	1	1	1	1	-	1	1	1	-	1
4315659	TGCAGGTGGAGGTGGTGCTCTTGCTGCTGCCTCCTGCTCCCCGCCGCCAACTCCTCCATGGCCGCGGCG	-	-	1	1	1	1	1	1	1	1	1	1	1	1	1	1	1	1	1	1	1	1	1	-	1	1	1	1	1	1	1	1	1	1	1	-	1	1	1	1	1	1	1	1	1	-	-	1
4294443	TGCAGGCAATAATCAATTCAGCTGCATGCCCGCTGCGCCACTGTTGCGCCGAGATCGGAAGAGCGGTTC	1	-	1	-	1	1	1	-	1	1	1	1	1	1	1	1	-	1	-	-	1	1	1	1	1	1	1	1	1	1	1	1	1	1	1	-	1	1	1	1	1	1	-	1	1	1	1	-
4267966	TGCAGGCGGAAGAGAACCGCTCGGGACCCGCCGCCAAGGCCAATCTTGTCCTCAAGGCAGGGCGGTTCG	1	-	1	1	1	1	1	1	1	1	1	1	1	1	1	1	1	1	0	1	1	1	1	1	1	1	-	1	1	1	-	1	1	1	1	1	1	1	1	1	1	1	1	1	1	1	1	1
4301029	TGCAGCCAACCTCCTCCATGACGTCCATGGCCATGGCGCCGCCGTTCTCGCACGCCACCGCCACCGCAG	1	1	1	1	1	1	1	1	1	1	1	1	1	1	1	1	1	1	1	1	1	1	1	1	1	-	1	1	1	1	1	1	1	1	1	1	1	1	1	1	1	1	-	1	1	-	1	1
4289566	TGCAGAGACGGGCCCTCCCTCGCCCTCGCCCTCTTCAACCGTGTCTGCCGAGAAGAAGCCGAGATCGGA	1	1	1	1	1	1	1	1	1	1	-	1	1	1	1	1	-	1	1	1	1	1	1	1	-	-	1	1	1	-	1	1	1	1	1	1	1	1	1	-	1	-	1	1	1	1	-	1
4303605	TGCAGCACGCGGTGCGCGCTGGGGACGCGCGCGCGGTGCCGAGATCGGAAGAGCGGTTCAGCAGGAATG	1	1	1	1	1	1	1	1	1	1	1	1	1	1	1	1	1	1	1	1	1	1	1	1	1	1	1	1	1	1	1	1	1	1	1	1	1	1	1	1	1	1	-	1	1	1	1	1
4276752	TGCAGCTTCTCCTCGCTCAAGCACCCGAGGTACTTCTCCCCGAGATCGGAAGAGCGGTTCAGCAGGAAT	1	1	1	1	1	1	1	1	-	1	-	-	1	-	1	1	-	1	1	-	1	1	1	1	1	-	1	1	1	1	1	1	1	1	1	1	1	1	-	1	1	1	-	-	1	1	1	1
4282317	TGCAGACTCTCTAGGGCAATCAGCTCAGCCAGCCCGGCAGGGAGTCCACCAGTGAGGTTATTATATGAC	1	1	1	1	-	1	1	1	-	-	0	1	1	1	1	1	1	1	1	1	1	1	1	1	1	1	1	1	1	1	-	1	1	1	1	1	1	1	1	1	1	1	1	1	1	1	1	1
4277740	TGCAGGATTAGCCGAGAGTAAGAGTGGTCGTGCCTGGACTTGGCTGAGGACGGGAAATGTCTCCATGGA	1	-	1	1	-	1	1	1	1	1	1	1	1	1	1	1	1	1	1	1	1	1	1	1	-	1	1	1	1	1	0	1	1	1	-	1	1	1	1	1	1	1	1	1	1	-	1	1
4283041	TGCAGCGCCACGCAGAACGTCCCCGACGCCAGCGACCGCCTCCCGCCGCCCCCACCGAGATCGGAAGAG	1	1	1	-	1	-	1	1	1	1	1	1	1	1	1	1	1	1	1	1	1	-	1	1	1	1	1	1	1	1	1	1	1	1	1	1	1	1	1	1	1	1	1	1	1	1	-	1
4280944	TGCAGGGGCCCTTCTACATGGTCAGCCTGACCGGGATCAGCGTGGGCGGCGAGGACGTGCAGTCCCCGA	1	1	1	1	1	1	1	-	1	1	1	1	1	1	1	1	1	1	1	1	1	1	1	1	-	1	1	1	1	1	-	1	1	1	1	1	1	1	1	1	1	1	1	1	1	1	1	1
4264417	TGCAGCACCATCTCCACCGTGGTGTTGAACCGCAGCCTCCTCACTCTGGTGCCCTTGGACGTCAGCATC	1	1	1	1	-	1	1	1	1	1	1	1	1	1	1	1	1	1	-	1	1	1	1	-	1	1	1	-	1	1	1	1	1	1	1	-	1	1	1	1	1	1	1	1	1	1	-	1
4268823	TGCAGGAAAGCAACTTGATATTGCGATCCAGATCCAGCAAGAAGTAACGTTGCACTATGACTCAATCCA	1	1	-	1	1	1	1	1	1	1	1	1	1	1	1	1	1	1	1	0	1	1	1	1	1	1	1	-	1	1	-	-	1	1	1	1	1	1	1	-	1	1	-	1	1	-	1	1
4295121	TGCAGCATCAGATTGTTTCGTCCACAACTCAACGCTCCGAGATCGGAAGAGCGGTTCAGCAGGAATGCC	1	1	1	1	1	1	1	1	-	-	1	1	1	1	1	1	1	1	1	0	1	1	1	1	1	1	1	1	1	1	1	1	-	1	1	1	1	1	1	1	1	1	1	1	1	1	1	1
4264452	TGCAGAACTTGACGAAGCTGCTGCTGCTAAGCAACGAGCTCTCCGAGATCGGAAGAGCGGTTCAGCAGG	-	-	1	1	1	1	-	0	-	1	1	1	1	-	1	1	1	1	1	1	1	1	1	1	-	1	1	1	1	1	1	1	1	1	1	1	1	1	1	1	-	1	1	1	1	1	1	1
4278923	TGCAGAACCTTCACCCACCGCGCCTGGGTGAAGCTAATGCGTCCTTTCAGTCCCCAAGATTTCATCCGA	-	1	1	1	1	1	1	0	1	1	1	1	1	-	1	1	1	1	-	1	1	1	1	-	1	1	1	1	1	-	-	1	1	1	1	1	1	1	1	1	1	-	1	-	1	1	1	1
4300661	TGCAGGTGGCCAATATTCTGAACAACCCTTTCTCGCTCGTCCGAGATCGGAAGAGCGGTTCAGCAGGAA	1	1	-	1	1	1	1	-	1	1	1	0	1	1	1	1	-	1	1	1	1	1	1	1	1	0	1	1	1	1	1	1	1	1	-	1	1	1	1	1	1	1	1	1	1	1	1	1
4271154	TGCAGCAGCTGGTGGCCTGCGGCCAGTGGAGGCAAGCCCTCGACTACACCCGAGATCGGAAGAGCGGTT	1	-	1	-	1	1	-	-	-	1	1	1	1	1	1	1	1	1	-	1	1	1	1	1	1	1	1	1	1	1	-	1	1	1	1	1	1	1	1	1	1	1	1	1	-	1	1	1
4266018	TGCAGCTTTCAAATCGTTTCACGAGGTACCACCAGAACGGCCCGACGCTGAACCGAGATCGGAAGAGCG	-	-	1	1	1	1	1	1	1	1	1	1	1	1	1	1	1	1	1	-	1	1	1	1	1	1	1	1	1	1	-	1	-	1	1	1	1	1	1	1	1	1	1	1	1	1	1	1
4301343	TGCAGGAGAACGGCACCGACACCGCCCGAAATCGGAAGAGCGGTTCAGCAGGAATGCCGAGACCGATCT	-	-	1	1	1	1	1	-	1	1	1	1	1	1	-	1	1	1	1	1	-	1	1	1	1	1	1	1	1	1	-	-	1	1	1	1	1	1	1	1	1	1	1	1	1	1	1	-
4296201	TGCAGCTGAGGGACCGCACCCATGCCGTCGCCATCGTGACGGCCAAGAGCAGAGCGCGCGCTCGAGGGA	1	1	1	1	1	1	1	1	1	1	1	1	1	1	1	1	1	1	1	1	1	1	1	1	1	1	1	1	1	1	-	1	1	1	1	1	1	1	0	1	1	1	1	1	1	0	1	1
4280285	TGCAGTCTGAAGCCGAAGCTCAGCGCCGCCAGTGCCTCCTTCCGAGATCGGAAGAGCGGTTCAGCAGGA	-	-	1	1	1	-	1	1	-	1	-	1	1	-	1	1	1	1	-	1	1	1	1	1	1	1	1	1	1	1	-	1	1	1	1	1	1	1	1	1	1	0	1	1	-	1	1	1
4270477	TGCAGTCAGCTCCCCGACCGTCACCGTCTTGAGCTCGCCGTCGGCCCAGATCGGAAGAGCGGTTCAGCA	1	1	0	1	1	1	1	1	-	-	-	1	1	1	1	1	1	-	1	1	1	1	1	1	1	1	1	1	1	-	1	1	1	1	1	1	1	-	1	1	1	1	1	1	1	1	-	1
4302826	TGCAGTCAGCTCCCCGACCGTCACCGTCTTGAGCTCGCCGTCGACCGAGATCGGAAGAGCGGTTCAGCA	1	1	0	1	1	1	1	1	-	-	-	1	1	1	1	1	1	-	1	1	1	1	1	1	1	1	1	1	1	-	1	1	1	1	1	1	1	-	1	1	1	1	1	1	1	1	-	1
4293229	TGCAGCTGCAAGCACGATGAACAAGAGACGGTAGAGACCGAGATCGGAAGAGCGGTTCAGCAGGAATGC	1	1	1	1	1	1	1	1	1	0	0	-	1	1	1	1	1	1	-	1	1	1	1	1	1	1	1	1	1	1	1	1	1	1	1	1	1	1	-	1	1	1	1	1	1	1	-	1
4291444	TGCAGCATCAACGGCAGCAATGACAGAGACCGCGAGGCGAACGTGCAGGTCGTGCTCCCAGATCGGAAG	1	-	1	1	-	1	1	1	-	1	1	-	1	1	1	1	1	1	1	-	1	1	1	1	1	1	1	1	1	1	1	1	1	1	1	1	1	1	1	1	1	1	1	1	1	1	-	1
4292350	TGCAGGCAGCTCCCCAATTCGCGCGCCGCAGATTCCGAGATCGGAAGAGCGGTTCAGCAGGAATGCTGA	1	1	1	1	1	-	1	1	1	1	1	1	-	1	1	1	1	1	0	-	1	1	1	1	1	1	-	1	1	1	1	1	1	1	-	-	1	1	1	1	-	-	1	-	1	1	-	1
4284348	TGCAGGCAGCTCCCCAATTCGCGCGCCGCAGATTCCCAGATCGGAAGAGCGGTTCAGCAGGAATGCCGA	1	1	1	1	1	-	1	1	1	1	1	1	-	1	1	1	1	1	0	-	1	1	1	1	1	1	-	1	1	1	1	1	1	1	-	-	1	1	1	1	-	-	1	-	1	1	-	1
4263711	TGCAGGCCCTGCATCCTGCACATGCTGGAGCACGTGAGCGCCTCGAGCGCCGAGATCGGAAGAGCGGTT	-	1	1	1	1	1	1	0	1	1	1	1	1	1	1	1	1	1	1	1	1	1	1	1	1	1	1	1	1	1	1	1	1	1	1	1	1	1	1	1	1	1	1	1	1	-	1	1
4281629	TGCAGCTGGTGATGTTGCTGGGCCGCGTGCTGGGCTGCCGAGATCGGAAGAGCGGTTCAGCAGGAATGC	-	-	1	1	1	1	1	1	0	1	0	1	1	-	1	1	1	1	1	1	1	1	1	1	1	1	1	1	1	1	1	1	1	1	1	1	1	1	1	-	1	1	1	-	1	-	1	1
4279174	TGCAGCAGCTTGCCGATCTTGTCCTTCACCTCGCTCAGCTCCCAGCCGAGATCGGAAGAGCGGTTCAGC	1	1	1	1	1	1	1	1	-	1	-	1	1	1	1	1	1	1	1	-	1	1	1	1	1	1	1	1	1	1	1	1	1	1	-	1	1	1	1	1	1	1	-	1	1	1	1	1
4290991	TGCAGTTCAGAACTCAGATCTGGAGATGAATGTTCTAATAATGGCGCCGAGATCGGAAGAGCGGTTCAG	1	1	1	1	1	1	1	1	1	1	1	1	1	-	1	1	1	1	1	1	1	-	1	1	1	1	1	1	1	1	-	1	1	1	1	1	1	1	1	1	1	1	1	1	1	-	1	1
4303639	TGCAGGAGAGCAGCCAGCTCGGGGAGAGGCGTCGCAGCGCCGAGATCGGAAGAGCGGTTCAGCAGGAAT	1	1	1	1	1	1	1	1	1	-	1	1	1	1	1	1	1	1	1	-	1	1	1	1	1	1	1	1	1	1	-	1	1	1	1	1	1	1	1	1	1	1	1	1	1	1	1	1
4268797	TGCAGGGCGGGATCCCGTTCGAGAAGTCCAAGGGCCAGCACATCCTGCGGAACCCGAGATCGGAAGAGC	1	-	1	1	-	-	-	1	1	1	1	1	1	1	1	1	1	1	1	1	1	1	1	1	1	1	1	-	1	1	1	1	1	-	1	1	1	1	1	1	1	-	1	-	1	1	1	1
4278463	TGCAGAAGGCCGTGTCCAAGCCAAACGTGCTAGCTGAAATGACCGAGATCGGAAGAGCGGTTCAGCAGG	1	1	1	1	1	1	1	1	1	1	1	-	1	1	1	1	-	1	1	-	1	1	1	1	1	1	1	1	1	1	1	1	1	1	1	-	1	1	1	1	1	1	1	1	1	1	-	1
4301645	TGCAGTCGGTCTGGAACGGCGCCGCGTACCACGGCGTGCACCACATGCCGCGCGGCGTCCGAGATCGGA	-	-	1	-	1	1	1	1	1	1	1	-	1	1	1	1	1	1	1	1	1	1	1	1	-	1	1	1	1	1	1	-	-	1	1	1	1	0	1	1	1	1	1	1	1	1	1	1
4329182	TGCAGCACCAGGTGCACCAGCAGGTCCAGGCTCTCCAGCGCCGTCACCAGCGCGCCGAGATCGGAAGAG	-	1	1	1	1	1	-	1	1	1	1	1	1	-	1	1	1	1	1	1	1	-	1	1	1	1	1	1	1	1	0	1	1	-	1	1	1	1	1	1	-	1	1	1	1	0	1	1
4277681	TGCAGTTGCCCCGTGATTGGCCGCCCATCGATTATTGACCGAGATCGGAAGAGCGGTTCAGCAGGAATG	1	1	1	1	-	1	1	1	1	1	1	1	1	1	1	1	1	1	1	0	1	1	1	1	1	1	1	1	1	1	1	1	1	1	1	1	1	1	-	1	1	1	1	1	-	-	-	1
4294095	TGCAGGCAGGAGCAAGATCTCCCCCGAGACCGGAAGAGCGGTTCAGCAGGAATGCCGAGACCGATCTCG	1	1	1	1	1	1	1	1	1	1	1	1	1	1	1	1	1	1	1	1	1	1	1	1	1	1	1	1	1	1	1	-	1	1	1	1	1	1	1	1	1	1	1	1	1	1	-	1
4264576	TGCAGCTGCATACGGCATGCTCTGTTTCTGCATGGACAACCTCGCCGTCCGAGATCGGAAGAGCGGTTC	-	-	1	1	1	1	-	1	1	1	1	1	1	-	1	1	1	1	-	1	1	1	1	1	1	1	1	1	1	-	-	-	1	1	1	1	1	1	1	1	1	1	1	1	1	1	-	1
4284184	TGCAGCAGTTTGCGCGCGCGCGACCGCTGCGCGGATAGCCGAGATCGGAAGAGCGGTTCAGCAGGAATG	1	1	-	1	1	1	1	0	-	-	1	1	1	-	-	1	1	1	1	1	1	1	1	1	1	1	1	1	1	1	1	1	1	1	1	1	1	1	1	1	1	1	1	-	1	1	1	1
4267132	TGCAGCGGTGAACCTCTGGCTGCGGCGGAGCGCGCGGGTTGATCCGAGATCGGAAGAGCGGTTCAGCAG	1	1	1	-	1	1	1	0	-	1	1	1	1	1	1	1	1	1	1	1	1	1	1	1	1	1	1	1	1	1	1	1	1	1	1	1	1	1	1	1	1	1	1	1	1	1	1	1
4299885	TGCAGGGCACCCGTGACAGGATCTCCATGAGAGCGTCCTCCGAGATCGGAAGAGCGGTTCAGCAGGAAT	1	1	1	1	1	1	1	1	1	1	1	1	1	1	1	1	1	1	-	1	1	1	1	1	1	1	1	1	1	1	-	-	1	-	-	-	1	-	1	1	1	1	1	1	1	1	-	1
4284303	TGCAGCTGAAGAAGAACAAGCTGTCGGGGACCTGCAAGCTCAAGCTGAAGCTCGACTCGCCGAGATCGG	-	1	1	1	1	1	1	1	-	1	1	1	1	1	1	1	1	1	0	1	1	1	1	1	1	1	1	-	-	1	1	1	1	1	-	1	1	1	1	1	1	1	1	-	1	1	1	1
4278822	TGCAGCCCAGCCCAATCTTCTTTTTCTCCCTCACCCGAGATCGGAAGAGCGGTTCAGCAGGAATGCCGA	-	-	1	1	1	1	1	-	1	1	1	1	-	1	1	1	1	1	-	1	1	-	1	1	1	-	1	1	1	1	1	1	1	1	1	1	1	1	1	1	1	1	1	1	1	1	1	1
4280180	TGCAGATCCGTGAGCTCCCGAGCTTAGCATGACTTGCTGGTTTTCCGAGATCGGAAGAGCGGTTCAGCA	1	1	1	1	1	1	1	1	1	1	1	1	1	1	1	1	-	1	1	-	1	1	1	1	1	0	1	1	1	1	1	1	1	1	1	-	-	1	1	1	1	1	1	1	1	1	1	-
4281833	TGCAGACGCAGATGCTCATGGGAGACGGCGGCGCGACAGCCGAGATCGGAAGAGCGGTTCAGCAGGAAT	1	-	1	1	1	1	-	1	1	1	1	1	1	1	1	1	-	1	1	1	1	1	1	1	1	1	1	-	1	1	1	1	1	1	1	1	1	1	1	1	1	1	1	-	1	1	1	1
4278430	TGCAGGGCACAGATCCCCAAAACGGCAATTAATCCACCTCCCGCCGAGATCGGAAGAGCGGTTCAGCAG	1	-	1	1	1	1	1	1	1	1	-	1	1	1	1	1	-	1	1	1	1	1	1	1	1	1	1	1	1	1	1	1	1	1	-	-	1	1	1	-	1	-	1	1	1	-	0	1
4276313	TGCAGCGGTACAGCGCCAGCACGGGCGGCCGCATCGTCGTGGGCTGCATCCCCTACCGAGATCGGAAGA	1	-	1	1	1	-	1	1	-	1	1	1	1	1	-	1	1	1	1	1	1	1	1	1	1	1	1	1	1	-	1	1	1	1	1	1	1	1	1	1	1	1	-	1	1	1	1	1
4295948	TGCAGAGCGGACCTACTCGGAGCCGCGCAAGTGGATGCGGGGCAAGGGCCGAGATCGGAAGAGCGGTTC	1	1	1	1	1	1	1	1	1	1	1	1	1	1	1	1	1	1	-	0	1	1	-	1	1	1	1	-	1	-	-	1	1	1	1	1	1	1	1	1	-	1	-	1	1	1	1	1
4280874	TGCAGAGGAAGGGCCAGATCTGCTGGCTGGTGGCTCCGAGATCGGAAGAGCGGTTCAGCAGGAATGCCG	1	1	0	1	1	1	-	1	1	1	1	1	1	1	1	1	1	-	1	1	1	1	1	1	1	1	1	1	1	1	-	1	1	1	1	1	1	1	1	1	1	-	1	1	-	-	1	1
4299685	TGCAGGCCTTGTACATGGCCAAGTGTGCGCCGAGATCCGAAGAGCGGTTCAGCAGGAATGCCGAGACCG	1	1	1	1	1	1	1	1	1	1	0	1	1	1	1	1	1	1	-	0	1	1	1	1	1	1	1	1	1	1	1	1	1	1	-	-	1	1	1	1	1	1	1	-	-	-	1	1
4291363	TGCAGCAGCCCCTGCGGCAGCATTGGGAACTCGCCCTCGTCCTCGTACCCGTTGTCGCCGAGATCGGAA	-	1	1	1	-	1	1	1	1	1	1	1	1	1	1	1	1	1	-	1	1	1	1	-	1	1	1	1	1	1	0	1	1	1	1	1	1	1	1	1	1	1	1	1	1	1	1	1
4283913	TGCAGCACGCTCCTGAGCATGGAGAACGGGGGCTCCACCACCGATACCTTCCAAGGCGTGGAGTTCCGA	1	-	1	1	-	-	1	1	1	1	1	1	1	1	1	1	-	1	-	1	1	1	1	1	1	0	-	1	1	1	1	1	1	1	1	1	1	-	1	1	1	1	1	1	1	-	1	1
4292816	TGCAGGGTGAGGAGCGTCAGGCAGAGCGCTACCTTACGCCGAGATCGGAAGAGCGGTTCAGCAGGAATG	1	1	1	1	-	1	1	1	1	1	1	1	1	1	1	1	-	1	1	-	1	1	1	1	1	1	1	1	1	1	0	-	1	1	1	1	1	1	1	1	1	1	1	1	-	1	-	1
4264392	TGCAGCGACACAGAGATGAGGCGCAGGACGCCCAAAAAGAGGCTGCCAAGCCGAGATCGGAAGAGCGGT	-	1	1	1	1	1	1	1	1	1	1	1	1	1	-	1	1	1	1	1	1	1	1	1	1	1	1	1	1	1	1	1	-	1	1	-	1	1	1	1	1	1	1	1	1	-	1	1
4274655	TGCAGCTGGTGCGCCTCGAGCAAGGACGGCAGGTCCGAGATCGGAAGAGCGGTTCAGCAGGAATGCCGG	1	1	1	1	-	-	1	1	-	1	1	1	0	1	1	1	1	1	1	-	1	1	1	1	1	1	1	-	1	1	-	1	1	1	1	1	1	1	1	1	1	1	1	1	1	1	1	1
4300496	TGCAGCTGGTGCGCCTCGAGCAAGGACGGCAGGTCCGAGATCCGAAGAGCGGTTCAGCAGGAATGCCGA	1	1	1	1	-	-	1	1	-	1	1	1	0	1	1	1	1	1	1	-	1	1	1	1	1	1	1	-	1	1	-	1	1	1	1	1	1	1	1	1	1	1	1	1	1	1	1	1
4293440	TGCAGCGACCCGTTGGGCATGAGGTCGTAGACGAGCATCATCCGAGATCGGAAGAGCGGTTCAGCAGGA	1	-	1	1	1	-	1	1	1	1	1	1	1	1	1	1	1	1	1	-	1	1	1	1	1	1	1	-	1	1	1	1	1	1	-	1	1	1	1	1	1	1	1	1	1	1	-	1
4270366	TGCAGCCGCCGATGTCGGGGAGGCGGAGCATTTGGCCGAGATCGGAAGAGCGGTTCAGCAGGAATGCCG	1	1	1	1	1	1	1	1	-	1	-	1	1	1	1	1	1	1	1	-	1	1	1	1	1	1	1	1	1	1	1	1	1	1	1	1	1	1	1	1	1	1	1	1	1	1	1	0
4271914	TGCAGGAGTCAGCTAAGAGACAGCGACACCGACGCCGAGATCGGAAGAGCGGTTCAGCAGGAATGCCGA	1	1	1	1	1	1	1	1	1	1	1	1	1	1	1	1	-	1	1	1	1	1	1	1	1	0	1	1	1	1	1	1	1	1	1	1	1	-	1	1	1	1	1	1	1	1	-	1
4297163	TGCAGAAGCGTCCACCGCGAGGTCTCGGGGACTCCCCAGATCACCGCCCGAGATCGGAAGAGCGGTTCA	1	1	1	-	1	1	1	0	1	1	1	1	1	1	1	1	1	1	1	1	-	1	1	1	1	1	1	1	1	-	-	1	1	1	1	1	1	1	1	1	1	1	1	1	1	1	-	1
4310182	TGCAGCGTGACCTTCTGGAGGATCATCAAGAGGAAGTCGACGGAGGACTTCTCCGAGATCGGAAGAGCG	1	-	1	1	1	1	1	1	1	1	1	1	-	1	1	1	1	-	1	1	1	1	1	1	1	1	1	-	1	1	1	1	1	1	1	-	-	-	1	-	1	1	1	1	-	1	0	1
4280420	TGCAGCGGGATCAGGCTCAAGAACATCAGGCTGACGTACCGAGATCGGAAGAGCGGTTCAGCAGGAATG	1	1	1	1	1	1	1	1	1	1	1	1	1	-	1	1	-	1	1	1	1	-	1	-	1	0	1	1	1	1	1	1	1	1	-	1	1	1	1	1	1	1	-	1	1	1	1	1
4299356	TGCAGGTGGATTGGGAACTTCTGGCGAAGCGGAGAAGTGCCGAGATCGGAAGAGCGGTTCAGCAGGAAT	1	1	1	1	1	1	1	1	1	1	1	1	1	1	1	1	1	1	1	1	1	1	1	1	1	1	1	1	1	1	1	1	1	1	1	1	1	1	1	1	1	1	1	-	1	1	1	1
4323793	TGCAGCCTGCACGAGCTGCCGAGATTGGAAGAGCGGTTCAGCAGGAATGCCGAGACCGATCTCGTATGC	1	-	1	1	1	-	-	0	-	1	-	1	1	-	-	1	1	1	1	1	1	1	1	1	1	1	1	1	1	-	1	1	1	1	1	1	1	1	1	1	1	1	1	1	1	-	1	1
4293529	TGCAGCAGGATCCCCACCCCCGCCACCTGCTGCTCCTTGCCGAGATCGGAAGAGCGGTTCAGCAGGAAT	1	-	1	-	1	1	-	1	1	1	1	1	1	1	1	-	0	1	1	0	1	1	-	1	1	-	1	1	1	1	1	1	1	1	1	1	1	1	1	1	1	-	1	1	1	1	1	1
4280803	TGCAGGTGGTGGCTGCCAAACTCCGAGATCGTAAGAGCGGTTCAGCAGGAATGCCGAGACCGATCTCGT	1	1	1	1	1	1	1	1	1	1	1	1	1	1	1	1	-	1	-	-	1	1	1	1	1	0	1	1	-	1	1	1	-	1	1	1	1	1	1	1	1	1	1	1	1	1	1	1
4277590	TGCAGGGCATGATAGCGGAGCCATGGCCCGAGATAGGAAGAGCGGTTCAGCAGGAATGCCGAGACCGAT	1	1	-	1	1	1	1	1	1	1	1	1	1	1	1	1	1	1	1	1	1	1	1	1	1	1	1	1	1	1	1	1	1	1	1	1	1	1	1	1	1	1	1	-	1	1	1	1
4295964	TGCAGCACTCAGGCCACCGCGCGCCCGCCAGTGCCAGCCGAGATCGGAAGAGCGGTTCAGCAGGAATGC	1	1	1	1	1	1	1	0	-	1	-	1	1	-	1	1	1	1	1	-	1	1	1	1	1	1	1	1	1	1	1	1	1	1	1	1	1	1	1	1	1	1	1	-	1	1	1	1
4304936	TGCAGGTAGCTTGGTGTCAAACTACGGTGGTCGTGATGAGGATGACAAGCATCGGGATGACCCGAGATC	1	1	1	1	1	1	1	1	1	1	1	1	1	1	1	1	1	1	1	1	1	1	1	1	1	1	-	1	1	1	1	1	1	1	1	1	1	1	1	-	1	1	1	1	1	1	1	1
4283118	TGCAGCCACTTCGGGTCCAGCGTCTCCGCCTCCTCCAGGTTCGGGATCTCGAAGACCGCCTGCACGTCC	1	1	1	1	1	1	1	1	1	1	1	1	1	1	1	1	1	-	1	1	1	1	1	1	1	1	1	1	1	1	0	1	1	-	-	1	1	1	1	1	1	1	1	1	1	0	1	1
4288640	TGCAGATATTTGGGCCTTTCTCAACAGGCGCGTGTGAACTCCGAGATCGGAAGAGCGGTTCAGCAGGAA	1	1	1	1	1	1	-	1	1	1	1	-	1	1	1	1	1	1	1	-	1	1	-	1	1	1	1	1	1	1	1	1	1	-	1	-	1	1	1	1	1	1	1	1	1	1	1	1
4294429	TGCAGCTGATCGGCACGTGCAATGGTCTTCTCTGCCTGTGCGACAACAAGGAGGCACCCGAGATCGGAA	-	1	1	1	1	1	1	1	1	1	1	0	1	1	1	1	1	1	1	1	1	-	1	1	-	1	-	1	1	1	-	1	1	1	1	-	1	1	1	1	1	1	0	1	1	1	1	1
4293326	TGCAGCTGCTGTCCGATGAGAAGAGAGAGAAGCGAGCCAGCGTCCGAGATCGGAAGAGCGGTTCAGCAG	-	-	1	1	-	1	1	1	1	1	1	1	1	1	1	1	-	1	-	1	1	1	1	1	1	1	1	1	1	1	1	1	1	1	1	1	1	0	0	1	1	1	1	1	1	1	1	1
4327157	TGCAGTACCCCTCGGTAACGTCACGCACAGCGCCGCGGCTCAGACCCTTGCAGAACGCGCACGTCGACA	1	-	1	1	1	1	1	1	1	1	1	1	1	1	1	1	1	1	1	1	1	1	1	1	1	1	1	1	1	1	1	1	1	1	1	1	1	1	1	1	1	1	1	1	1	1	1	1
4281132	TGCAGCTGCATTCTATAACCAACCAACAAAAGAAACTACCGAGATCGGAAGAGCGGTTCAGCAGGAATG	1	1	1	1	1	1	1	0	1	1	1	1	1	1	1	1	1	1	1	1	1	1	1	1	1	-	1	-	1	1	1	1	1	1	1	1	1	1	1	1	1	1	1	1	1	1	1	-
4263911	TGCAGGCGATAAAGCGTGCGTGGACGGAGCCCATGGACCGAGATCGGAAGAGCGGTTCAGCAGGAATGC	1	-	1	1	1	1	1	-	1	1	-	1	-	1	1	1	1	1	-	1	1	1	1	1	1	-	1	1	1	1	1	1	1	1	1	-	1	1	1	1	1	1	1	1	1	1	-	1
4291587	TGCAGCACAAGCCGCGGTTCCTTCAGCCAGGAACTGCCCCGAGATCGGAAGAGCGGTTCAGCAGGAATG	1	-	1	1	1	1	1	1	-	1	1	1	1	1	1	1	1	1	1	1	1	1	1	1	1	1	1	1	1	1	1	1	1	1	1	1	1	1	1	1	1	1	1	1	1	1	1	1
4328238	TGCAGCCTCTACCTCGTCTTCGACTACATGGTCCACGACCTCGCCGAGATCGGAAGAGCGGTTCAGCAG	1	-	1	1	1	1	1	1	1	1	-	1	1	1	1	1	1	-	-	-	1	1	1	1	1	1	1	1	1	1	1	1	1	1	1	-	1	1	1	-	1	1	1	1	1	0	-	1
4296432	TGCAGAAATGAACCCTTATGTCAGATCAAAGCTCGCAACGCCGAGATCGGAAGAGCGGTTCAGCAGGAA	1	1	1	1	1	1	1	1	1	1	1	-	1	1	1	1	-	1	1	1	1	1	1	1	1	1	1	1	1	1	-	1	1	1	1	1	1	1	-	1	1	1	1	1	1	1	0	1
4276317	TGCAGAGCGGGCAGGTGCTCTTCTTCTCCAACCACAGCGCGATGCAGCGCCGAGATCGGAAGAGCGGTT	1	-	1	1	1	1	1	1	1	1	1	1	1	1	1	1	1	1	1	1	1	1	1	-	1	0	1	1	1	1	1	1	1	1	1	1	1	1	1	-	1	1	-	1	1	1	1	1
4265258	TGCAGAATCTTACTCCTCTTGCAGGAGGGACGACGATGAACCCACCGAGATCGGAAGAGCGGTTCAGCA	-	1	1	1	1	1	1	-	1	1	-	1	1	1	1	1	1	1	1	1	1	1	-	1	-	1	1	1	1	1	1	1	1	1	-	-	1	1	-	1	1	-	1	1	1	-	1	1
4272638	TGCAGCTACAGTTCAGTTAGTTGACTGCTCTACTTGCTGACCTCGCGTAGCCGAGATCGGAAGAGCGGT	1	1	-	-	1	1	1	1	1	1	1	1	1	1	1	1	1	1	-	1	1	1	1	1	1	-	-	1	1	-	-	1	1	1	1	1	1	1	1	1	1	1	1	1	0	1	0	-
4286411	TGCAGGACGGCTGGTCTCCTCCTACTGCTGTTGCCTCCGAGATCGGAAGAGCGGTTCAGCAGGAATGCC	1	1	1	-	1	1	1	1	1	1	1	1	1	1	1	1	1	1	1	-	1	1	1	-	1	1	1	-	1	-	1	1	1	1	1	1	1	1	1	1	1	1	1	1	1	1	1	1
4279230	TGCAGGCCCTGCTCGCGCACCTGTGGCGCGCCGTGTGCCGCGCCCGAGATCGGAAGAGCGGTTCAGCAG	1	1	1	1	1	1	1	1	1	1	1	1	1	1	1	1	1	1	1	-	1	1	1	1	1	-	-	1	1	1	1	1	1	1	1	1	1	1	1	1	1	1	1	1	1	1	1	1
4272165	TGCAGGGGACCAGGTGGGCCGCCGCCGTGTCCGACGGCCGCAAGGCCGACCCGAGATCGGAAGAGCGGT	1	-	1	1	1	1	1	1	0	1	1	1	1	1	1	1	1	1	1	0	1	1	1	1	1	1	1	1	-	1	1	1	1	1	1	1	1	1	1	1	1	1	1	1	1	1	-	1
4273400	TGCAGATAAAGAGGAGGAGCTTCAGAAAGGACGACCCGACGGAAGAAAACAGAGCCAAAAGCGGCACCG	1	1	1	1	1	1	1	1	1	1	1	1	1	1	1	1	1	-	1	1	1	1	1	1	1	1	1	1	1	1	1	1	1	1	1	1	1	1	1	1	1	1	1	1	1	0	1	1
4328484	TGCAGTGGAGCCACCAAGAACAAGCCTGTCCAAGAGGCCATCGCTTGGAGCTTCTGCAAAGGTCCAGTC	1	-	1	1	-	1	1	1	1	1	1	1	1	1	1	1	-	1	1	-	1	1	1	1	1	1	1	1	1	1	-	1	1	1	1	1	1	-	1	1	1	1	1	1	1	0	0	-
4266944	TGCAGCAGCGGCCGCAGCGCGTCCCCGTCGAGCCGCCGAGATCGGAAGAGCGGTTCAGCAGGAATGCCG	1	1	1	1	1	1	1	1	1	-	1	1	1	-	1	1	1	1	1	1	1	1	1	1	1	1	1	1	1	1	-	1	1	1	1	1	1	1	1	1	1	1	1	1	1	1	1	-
4293959	TGCAGTACAGCGTCAAGGTCGGGCGGCCATACACCCGAGATCGGAAGAGCGGTTCAGCAGGAATGCCGA	1	1	1	1	1	1	1	1	1	1	1	0	1	1	1	1	1	1	1	1	1	-	-	1	1	-	1	1	1	1	-	1	1	1	-	1	1	1	1	1	1	1	1	1	1	1	1	1
4277079	TGCAGTGGAGCGAGCCAAGGACACGGAGTGCCATCTCAATCAACCGAGATCGGAAGAGCGGTTCAGCAG	-	1	1	1	1	1	1	1	1	1	1	1	1	1	1	1	1	1	1	1	1	1	-	1	1	1	1	1	1	1	1	-	1	1	1	1	1	1	1	-	1	1	1	1	-	-	1	1
4284387	TGCAGCCTTCTCCGCGGCCGTCTGCGTGGCGCCGCCGAGATCGGAAGAGCGGTTCAGCAGGAATGCCGA	1	1	1	1	1	1	1	1	1	1	1	1	1	1	1	1	1	1	1	1	1	1	1	1	1	1	1	1	1	1	1	1	1	1	1	1	1	1	1	1	1	1	1	1	1	1	1	-
4328426	TGCAGGGCCGTCCCAGCAGGTCCCCCCTCGCGCGCCGAGATCGGAAGAGCGGTTCAGCAGGAATGCCGA	1	1	1	1	1	1	1	0	0	-	1	1	1	1	1	1	1	1	1	1	1	1	1	1	1	1	1	1	1	1	1	1	1	1	1	1	1	1	1	1	1	-	1	1	1	1	1	-
4297317	TGCAGAGCCGTCCCAGCGGGTCCCCCCTCGCGCGCCGAGATCGGAAGAGCGGTTCAGCAGGAATGCCGA	1	1	1	1	1	1	1	0	0	-	1	1	1	1	1	1	1	1	1	1	1	1	1	1	1	1	1	1	1	1	1	1	1	1	1	1	1	1	1	1	1	-	1	1	1	1	1	-
4281008	TGCAGCTGCGGGCCGACGTGCTCAGGCAGCTGGACGGCGCGCCGAGATCGGAAGAGCGGTTCAGCAGGA	1	-	1	1	-	1	1	1	-	1	1	1	1	-	1	1	1	1	1	1	1	1	1	1	1	0	1	1	1	1	1	1	1	1	1	1	1	1	1	-	1	1	1	1	1	-	1	1
4281002	TGCAGCAGTAGCGCGCGCTGCCGTAGGCGTTGCAGGCGCTCTTGCATGCCACCACCTCACCGCTTGAGC	1	1	1	1	1	1	1	1	1	1	1	1	1	1	1	1	-	1	-	1	1	1	1	1	1	0	1	1	1	1	1	1	1	1	1	-	1	1	1	1	1	1	1	1	1	1	1	1
4270604	TGCAGCCAACCACAACCACACCAACCAGATCGGATCAGCCCGAGATCGGAAGAGCGGTTCAGCAGGAAT	-	0	1	1	1	1	1	1	1	1	1	1	1	1	1	1	1	1	1	1	1	1	1	1	1	1	1	1	1	1	1	1	1	-	1	1	1	1	0	1	1	1	1	1	1	1	1	1
4291180	TGCAGGGAGGCTGTTCGTCTACTGGTACGGGAGCGAGCCACGGGTGTGCGTGACGGACACCGAGATCGG	1	-	1	1	-	1	1	1	-	1	-	1	-	1	1	1	1	1	1	0	1	1	1	1	1	1	1	1	1	-	-	1	1	1	1	1	1	1	-	1	1	1	-	1	1	-	-	1
4300222	TGCAGCCCTTGGTGGTTTCGACGGTGCACAGGGTGTCGAGGGCATCGTCGCTCCGGCCGAGGATTCGAC	1	-	1	1	1	1	1	1	1	1	1	1	1	1	1	1	1	1	1	1	-	1	1	1	1	-	1	1	-	1	1	-	1	-	1	-	1	-	1	1	1	1	1	1	1	1	1	1
4302753	TGCAGCAGCATGAAGCTTCTTCTTGGCCCTCTTGGCATCCGAGATCGGAAGAGCGGTTCAGCAGGAATG	-	1	1	1	1	1	1	0	1	1	1	1	1	1	1	-	1	1	1	-	1	1	1	-	1	1	-	1	-	1	-	1	1	1	1	1	1	1	1	1	1	1	1	-	1	1	-	1
4267247	TGCAGAGCTGATGTGTCCACTACACATGGGCTAACCGAGATCGGAAGAGCGGTTCAGCAGGAATGCCGA	1	1	1	1	-	1	1	1	1	1	1	1	1	1	1	1	-	1	1	1	1	1	1	1	1	1	1	1	1	1	-	1	1	1	1	1	1	1	1	1	1	1	1	1	1	1	-	1
4295525	TGCAGCTTCCCCTTGTCGTCGTCGGACTCGCTGGCACCGTCGCCGAGATCGGAAGAGCGGTTCAGCAGG	1	1	1	1	1	1	1	1	1	1	-	1	1	1	1	1	1	1	-	1	1	1	1	1	1	1	1	1	1	-	1	-	1	1	1	-	1	1	-	1	1	1	1	1	1	1	1	1
4280355	TGCAGCTACTAATCTTTCACCGGCCTCCGTGAGCCACCCGAGATCGGAAGAGCGGTTCAGCAGGAATGC	1	1	1	1	1	1	1	1	1	1	-	-	1	1	1	1	1	-	0	1	1	1	1	1	1	1	1	1	1	1	1	1	1	1	1	1	1	1	1	1	1	1	-	1	1	1	1	-
4295289	TGCAGGACGCCTACGGCCACCTCCGCGACAAGGTGCAGCTCCGCATCTGGCGCCGCCCCGAGATCGGAA	1	-	1	1	1	1	1	1	1	1	1	1	1	1	1	1	1	1	1	-	1	1	1	-	1	1	-	1	1	-	-	1	1	1	1	1	1	1	1	1	1	1	1	1	1	0	-	1
4301306	TGCAGGCACTGTCGCTCGTGCGTGTTCCAAGTGTACCCGAGATCGGAAGAGCGGTTCAGCAGGAATGCC	1	1	1	1	1	1	1	1	1	1	1	-	1	1	1	1	1	1	1	1	1	1	1	1	1	1	1	1	1	1	-	-	1	1	1	1	1	1	1	1	1	1	1	-	1	0	-	1
4268893	TGCAGCACCTGAGCGCCCATGTCGATCGCCTGCGAGGAGACCGTGGTCGGCCTGCCCGAGATCGGAAGA	1	1	1	1	1	1	1	1	1	1	1	1	1	1	1	1	1	1	-	1	1	1	1	1	1	1	-	1	1	1	1	1	1	1	1	-	1	-	1	1	1	1	1	1	1	0	1	-
4328953	TGCAGATGGACTCGAAGGTGTCGATGAACGGTAGCTCCGAGATCGGAAGAGCGGTTCAGCAGGAATGCC	1	1	1	1	1	1	1	1	1	1	1	1	1	1	1	1	1	1	1	1	1	1	1	1	1	1	1	1	1	-	0	1	1	1	1	-	1	1	1	1	1	1	1	1	1	-	1	1
4290029	TGCAGTTCTTGAGATCATGGTCCCCAAACGGGGGAACGAGCCGAGATCGGAAGAGCGGTTCAGCAGGAA	1	-	1	1	1	1	1	1	1	1	1	-	1	1	1	1	1	1	-	1	1	1	1	1	1	1	1	1	1	1	1	-	1	1	1	0	1	1	1	1	1	1	1	1	-	1	1	-
4271290	TGCAGGTTCACAAACTGCTGCTTCTTGGTCTTGTGGTTGGAGAAGGACACCTTGTTGGCCCGAGATCGG	-	1	1	1	1	1	1	1	1	1	1	1	1	1	1	1	1	1	1	-	1	-	1	1	1	1	1	1	1	1	1	1	1	1	-	-	1	1	1	1	1	-	1	-	1	1	0	1
4326055	TGCAGTCGACGCAGGAGGAGGAGCAGATCGACACCCAGCTCAAGGGCAAGGCCTCCACCGAGATCGGAA	1	-	1	1	1	1	1	1	1	1	1	1	1	1	1	1	1	1	1	-	1	1	1	1	1	1	1	1	1	1	1	-	1	1	1	-	1	1	1	1	1	1	1	1	-	1	-	1
4276117	TGCAGCGTACGGCCATCATATGGAACGTCGTCCGAGATCCGAAGAGCGGTTCAGCAGGAATGCCGAGAC	1	1	1	1	1	1	1	1	1	1	1	1	1	1	-	1	1	1	1	1	1	1	1	-	1	1	1	1	-	-	1	1	1	1	1	1	1	1	1	1	1	1	1	1	1	1	1	1
4286909	TGCAGAATCTCCACCAGATAATTTAAACCAATTCAAAATCCCTAAATTACCCGAGATCGGAAGAGCGGT	-	-	1	1	1	1	1	1	1	1	1	1	1	1	1	1	1	1	0	1	1	1	1	1	1	1	1	1	1	1	1	1	1	1	1	-	-	1	1	1	1	-	1	1	1	0	1	1
4263701	TGCAGCTGGATAAGCAGGTGCAGAGTTGGAAGCATATAGCCGAGATCGGAAGAGCGGTTCAGCAGGAAT	-	1	1	1	1	1	1	1	1	1	1	-	1	1	1	1	1	1	1	1	1	1	1	1	1	1	1	1	1	1	1	1	-	1	1	-	1	1	1	1	1	1	1	1	1	1	1	1
4275925	TGCAGCTGCATCTGCATCAGGAGAGGTCCATCCGAGATCGGAAAAGCGGTTCAGCAGGAATGCCGAGAC	1	1	1	1	1	1	1	0	1	1	1	1	1	1	1	1	1	1	1	1	1	1	1	1	1	1	1	1	1	1	1	1	1	1	1	1	1	1	1	1	1	1	1	1	1	1	1	1
4264765	TGCAGACAGTAGCGCGATCTTTCTCATAAAGATGATCCAACCGAGATCGGAAGAGCGGTTCAGCAGGAA	-	-	1	1	1	1	1	1	1	1	-	1	1	1	1	1	1	1	1	1	1	1	1	-	1	1	1	-	1	1	-	1	1	1	-	0	1	1	1	1	1	-	1	1	1	1	-	1
4282774	TGCAGCGGTGTCCTTGGTGCAAAGAACTCACGGTCGCCCGAGATCGGAAGAGCGGTTCAGCAGGAATGC	1	-	1	1	1	1	1	1	1	1	-	1	1	1	1	1	-	1	1	1	1	1	1	1	1	1	1	1	1	1	-	1	1	1	1	1	1	-	1	1	1	1	-	1	1	1	0	-
4326474	TGCAGCAAACAAACCACGAGCGCGCGTCAGTCATCCACGCCATGATTGATCGTCTGTCCGAGATCGGAA	1	1	1	1	1	1	1	1	1	1	1	1	1	1	1	1	1	1	1	1	1	1	1	1	1	1	1	1	1	1	1	-	1	1	-	1	1	1	1	1	1	1	0	1	1	1	-	0
4284311	TGCAGCTTGTGCTCGCCGCGGCCGCAACCGAGATCAGAAGAGCGGTTCAGCAGGAATGCCGAGACCGAT	-	-	1	1	1	1	-	1	1	1	1	1	1	-	1	1	1	1	1	1	1	1	1	1	1	1	1	1	-	1	1	1	1	1	1	1	1	1	1	-	-	1	1	1	1	1	1	1
4277728	TGCAGCCGCCATGCCGTGCAATGACATCGGGGTGGTCTGGTGGCCACCGAGATCGGAAGAGCGGTTCAG	1	1	1	1	1	1	1	1	1	1	1	1	1	1	1	1	1	1	1	1	1	1	1	-	-	1	1	1	1	1	0	1	1	1	1	1	1	1	1	1	1	1	1	-	1	1	1	1
4296229	TGCAGGAAGTACTCCATCCCCGACGGCTTCACCCCTCTCCTCGCCGAGATCGGAAGAGCGGTTCAGCAG	1	1	-	1	1	1	1	0	1	1	1	1	1	1	-	1	1	1	1	1	1	1	1	1	1	1	1	1	1	1	1	-	1	1	1	1	1	1	1	1	1	1	1	-	1	1	1	1
4275640	TGCAGCTGAGGGACCGCACCCATGCCGTCGCCATCGTGACGGCCAACGCAGGCGAGCCAGGAACAGAGC	1	1	0	1	1	1	1	1	1	1	1	1	1	1	1	1	1	1	1	-	1	1	1	1	1	1	1	1	1	1	1	1	1	1	1	1	1	1	1	1	1	1	1	1	1	1	1	1
4268843	TGCAGCGCGGAGAAGACGACGTAGGTGGACTGCTGCACCACGGCCACGTAGTAGATGATCCCGAGATCG	1	-	1	1	1	1	1	1	1	1	-	-	1	1	1	1	1	-	1	1	1	-	1	-	1	1	1	1	1	1	-	1	1	1	1	1	1	0	0	1	1	1	-	1	1	-	1	1
4301990	TGCAGTTCCCCGTGGGAAGGATCGCCAGGTTCCTCAAGGCCGAGATCGGAAGAGCGGTTCAGCAGGAAT	1	-	1	1	1	1	1	1	1	1	1	1	1	1	1	-	-	1	1	1	1	1	1	1	1	1	1	1	1	1	-	1	1	1	1	1	1	1	1	1	1	-	1	1	1	1	1	-
4292509	TGCAGTCCCTCCTGGCTCTGTCCGACAGGGAGAGCGTCGTGTACAGCTACGGCATGGTGCTGCTGGAGA	1	-	1	1	1	1	1	1	-	-	1	1	1	1	1	1	1	1	1	1	1	1	1	1	-	1	-	1	1	1	1	1	1	1	1	-	1	-	1	1	1	1	1	1	1	1	0	1
4326307	TGCAGGGACTGGACGTAGTTGATGATCTCGTCGAGCATGCCGAGATCGGAAGAGCGGTTCAGCAGGAAT	1	1	1	1	1	1	1	1	1	1	1	1	1	1	1	1	1	1	1	1	1	1	1	1	1	1	1	1	1	1	1	1	1	1	0	1	1	1	1	1	1	1	1	1	1	1	1	-
4280655	TGCAGAGCACGCCGCGTGCGTCCTCCGACCCCGTGCACCCGAGATCGGAAGAGCGGTTCAGCAGGAATG	1	1	1	1	-	1	1	1	1	1	1	-	1	1	1	1	1	1	1	-	1	1	1	1	1	-	1	1	1	1	1	1	1	1	1	1	1	1	1	-	1	1	1	1	1	1	-	-
4327787	TGCAGCTCAAAGCGGAGCACTGCTACATCGTTGCCGACCTCAATGTCCACCCCAAGAAAAAGGGCGTTA	1	1	1	1	-	1	1	0	1	1	1	1	1	1	1	1	1	1	1	0	1	1	1	1	-	1	1	1	1	1	1	1	1	1	1	1	1	1	1	1	1	1	1	1	1	-	1	1
4278546	TGCAGCCCATGCCGGTGAGGTTGAACACCTTCACGTCCTCCCGAGATCGGAAGAGCGGTTCAGCAGGAA	1	1	1	1	1	1	1	-	1	1	1	1	1	1	1	1	1	1	1	1	1	1	1	1	1	1	1	1	1	1	1	-	1	1	1	0	1	-	1	1	1	1	1	1	-	1	1	1
4269542	TGCAGTTGGACAAGTTCTACCAGCCGAAGAAGAGCCGAGATCGGAAGAGCGGTTCAGCAGGAATGCCGA	1	1	1	1	1	1	-	-	1	1	1	1	1	1	1	1	1	1	1	1	1	1	1	1	1	1	1	1	1	1	1	1	1	1	1	1	1	0	1	1	1	1	-	1	1	-	1	1
4274434	TGCAGCGGATCAAAGAACCCACTGATGAAACGCAGTTCCACACGCCTCTCCCGTTCCGAGATCGGAAGA	-	-	1	1	1	1	1	1	1	1	1	-	1	1	1	1	1	1	1	1	1	1	1	1	1	1	1	1	1	1	1	1	1	1	1	1	1	1	1	1	1	1	1	1	1	-	0	1
4289097	TGCAGTCAACTGTCGATGCACGAAACCACGACAGACCCGAGATCGGAAGAGCGGTTCAGCAGGAATGCC	1	1	1	1	1	1	1	1	-	1	1	1	1	1	1	1	-	1	1	1	1	1	1	1	1	-	1	1	1	1	1	1	1	1	1	1	1	1	1	1	1	1	1	1	1	1	1	1
4327248	TGCAGCGTTGCCGGGAGGCTCGGTGGCAGCTCGGAGAGCTCAGCGCTCCGAGATCGGAAGAGCGGTTCA	1	1	1	1	1	-	1	1	-	1	-	1	1	1	1	1	1	-	1	1	1	1	1	1	1	1	1	1	1	1	0	1	1	1	1	1	1	1	1	1	1	1	1	-	-	1	0	-
4303198	TGCAGGCCCAACCGTTGTTTAATTTTCGAAATTTGAAGCACCGAGATCGGAAGAGCGGTTCAGCAGGAA	-	1	1	1	1	1	1	1	1	1	1	1	1	1	1	1	1	1	-	1	1	1	1	1	1	1	1	1	1	1	1	1	1	1	1	1	1	1	1	1	1	1	1	1	-	1	-	1
4290768	TGCAGTACTACTTGCCTCTCTTTGGGTCCTCTGAGAATCTCCTCCGAGATCGGAAGAGCGGTTCAGCAG	1	-	1	1	1	1	1	1	1	1	1	1	1	-	1	1	-	1	1	1	-	1	1	1	1	1	1	-	1	1	1	-	1	1	1	1	1	1	1	1	1	1	1	-	1	1	1	1
4288426	TGCAGGAACATGTACATGTAGTCGTCGAGGTCCCTTCGCGCGCAGGCGAACCTGTCGACCCAGAGCAGG	1	1	1	1	1	1	1	1	1	1	1	1	1	1	1	1	-	1	1	1	1	1	1	1	-	1	1	1	1	1	-	1	1	1	1	1	1	1	1	1	1	1	1	1	1	0	-	1
4289507	TGCAGGCGAGGCATCTAAATCCATCAAATCACATTCAATTCCCCTACGCCCTGTTTGTTCCGAGATCGG	1	1	1	1	1	1	1	1	1	1	1	-	1	1	1	1	1	1	-	1	1	1	1	-	1	1	1	1	1	1	0	1	1	1	1	1	1	1	1	1	1	1	1	1	1	1	-	1
4284751	TGCAGGGCTGCCACATGGTGCACTGCGCCTACAACTCCCTCTGGATGGGCAGCTTCATCCACCCGAGAT	1	-	1	1	1	1	1	1	1	1	1	1	1	1	1	1	-	1	1	-	1	1	-	1	-	0	1	1	1	1	-	1	1	1	1	1	1	1	1	-	1	1	1	1	1	1	-	1
4274717	TGCAGCGCCGACGCCCGCGGGCAGACTTTGCCGACGCACTCCGAGATCGGAAGAGCGGTTCAGCAGGAA	1	-	1	1	1	1	1	1	1	1	1	1	1	1	1	1	1	1	-	1	1	1	1	-	1	1	1	-	1	1	1	1	-	1	1	1	1	1	1	1	1	1	-	1	1	1	-	1
4282682	TGCAGAAAGGAGTAAAAGGCCGAGCGCTGCCCTGGCCCCTCGCCTCGCCGAGATCGGAAGAGCGGTTCA	-	1	1	1	1	1	1	1	1	1	1	-	1	1	1	1	-	1	-	1	1	1	1	1	1	1	1	-	1	1	1	1	1	1	1	1	1	1	1	1	1	1	1	-	1	0	1	-
4274255	TGCAGGCCGTGCTCCTGGTCCGCCGCCGTCCCCCCGCCGTCACCGAGATCGGAAGAGCGGTTCAGCAGG	1	1	1	1	1	1	1	1	1	-	1	1	1	1	1	1	1	1	1	0	1	1	1	1	1	1	1	-	1	1	1	1	1	1	1	-	-	1	1	1	1	1	1	1	1	1	1	-
4303162	TGCAGGCCAAGAGGATAGACGCCAACCCCAGGGACTACCTTACCTTCTTCTGCTTAGGGAACCGAGATC	1	1	1	1	1	-	1	1	1	1	1	-	1	1	1	1	1	-	0	1	1	1	1	1	1	-	1	1	1	1	1	1	1	1	1	1	1	0	1	1	1	1	1	1	1	1	-	-
4329011	TGCAGCAGCAGCACGTGCAGTTGGTTTGACTCCCACCGAGATCGGAAGAGCGGTTCAGCAGGAATGCCG	1	1	1	1	1	1	1	1	1	1	1	1	1	1	-	1	1	1	1	-	1	1	1	1	1	1	1	1	1	1	1	1	1	1	1	1	1	1	1	1	1	1	1	1	1	1	1	1
4280469	TGCAGGTACGAAGGGTTGAAGCCACCATCTTCCCCAACACCCAGCTTTAGCAGCGGCACCACCGAGATC	1	1	1	1	1	1	1	1	1	1	1	-	1	1	1	1	-	1	1	-	1	1	1	1	1	1	1	1	-	1	1	1	1	1	1	0	-	-	1	1	1	1	1	1	1	1	1	1
4279939	TGCAGGAGGAGGAGGGGGAGAGGACGAGCCTCCACGGCGGAAGCAGCCGAGATCGGAAGAGCGGTTCAG	-	-	1	1	1	1	1	1	1	1	1	1	1	1	1	1	1	1	1	1	1	1	1	1	1	1	1	1	1	1	-	1	1	1	1	0	1	-	-	1	1	1	1	1	1	1	1	1
4290242	TGCAGCTGCTCCCCAACCGCGCCACCTCCATCCGCCTCCCCACCGAGATCGGAAGAGCGGTTCAGCAGG	-	1	1	1	1	1	1	1	1	1	1	1	1	1	1	1	-	1	1	1	1	1	1	1	1	1	1	-	1	1	1	1	1	1	1	0	1	1	1	1	1	1	1	-	1	1	1	-
4283107	TGCAGGTTGGCGGTGACCGCCGCGCGACGGCGCGCCTTGAAGATGGACACGCACTCCTTGCCGTACCCG	1	1	1	1	1	1	1	1	1	1	1	1	1	1	1	1	1	1	1	-	1	-	1	1	1	1	1	1	1	1	0	1	1	1	1	0	1	-	1	1	1	1	-	1	1	1	-	1
4266765	TGCAGTCAGTGGAGCAATCCTTCGATACCGTACATACCTCGTCCGAGATCGGAAGAGCGGTTCAGCAGG	1	-	1	1	-	1	1	1	1	1	1	1	1	1	1	1	1	1	1	1	1	1	-	-	1	1	1	1	1	1	1	1	1	1	-	-	1	1	1	1	1	-	1	1	1	0	1	1
4267572	TGCAGTTCGAGCTCAGCTTCATCGACGAGGTTGAGAAGCAGGATCCGAGATCGGAAGAGCGGTTCAGCA	1	1	1	1	1	1	1	1	1	1	1	1	1	1	1	1	1	1	1	0	1	1	1	1	1	1	1	1	1	1	1	1	1	1	1	1	1	1	1	1	1	1	1	1	1	1	1	1
4311837	TGCAGGGTTCCTTCACCTAATGATCAGATGATCATAGCCCGAGATCGGAAGAGCGGTTCAGCAGGAATG	1	1	1	1	1	1	1	-	1	1	1	1	-	1	1	1	1	1	1	-	1	1	1	1	1	1	1	1	1	1	-	1	1	1	1	0	1	-	1	1	1	1	1	1	1	1	-	-
4272345	TGCAGAGCAAGAAATCCATGGTCAGGGCGCTCTACAACCTGAGCCTCACCAACCAGGCCACCGAGATCG	1	1	0	1	1	1	1	1	1	1	1	-	1	1	1	1	1	1	1	1	1	1	1	1	1	1	1	1	1	-	1	1	1	1	1	1	1	1	1	-	1	1	1	0	1	1	1	1
4292700	TGCAGATTTACGGTGTATTTTGGACGATGGCATTGGAAATTTAGAATGCTCTTGGCCGAGATCGGAAGA	1	-	1	1	1	1	1	1	1	1	-	1	1	1	1	1	1	1	1	1	1	1	1	1	1	1	1	1	1	1	1	1	1	1	1	0	1	1	1	1	1	1	1	1	1	1	1	1
4295413	TGCAGCCTGGAGAGATACCGACGCGCGCAGGAATGGAGATGGAGGCCGAGATCGGAAGAGCGGTTCAGC	1	-	1	1	1	1	1	1	1	1	1	-	1	1	1	1	-	1	-	1	1	1	1	1	1	1	1	1	1	1	1	1	1	1	0	1	1	-	1	1	1	1	1	1	-	1	1	1
4282880	TGCAGACCGACGGCGAGACGATGACCCGTCGCTCTCCGAGATCGGAAGAGCGGTTCAGCAGGAATGCCG	1	-	1	1	1	1	-	1	1	1	1	1	1	1	1	1	1	1	1	1	1	1	1	1	1	1	1	1	1	1	1	-	1	1	1	1	1	1	1	1	1	1	1	1	1	1	1	1
4268262	TGCAGCTGGCGATTGAGGAGGAGGACGACGCCACCAGCAAGCTGGCGCAGCCGATGCAGCCCTCCCGAG	1	1	1	1	1	1	1	1	1	1	1	1	1	-	1	1	1	1	1	1	1	1	-	0	-	1	1	-	1	1	1	1	1	1	1	1	1	1	1	-	1	1	1	1	1	1	1	1
4292628	TGCAGCGTTGAGTCATGCAGCCCGTCTTCAACTCCAGATAAGCCGAGATCGGAAGAGCGGTTCAGCAGG	1	1	1	1	1	1	1	0	1	1	1	1	1	1	1	1	1	1	-	1	1	1	1	1	1	1	1	1	1	1	1	1	1	1	-	1	1	1	1	1	1	1	1	1	1	1	1	1
4293447	TGCAGTGTTTGCCATGTACGTTGTAGCTCAGCGAGAGACCAAATGACCGAGATCGGAAGAGCGGTTCAG	-	-	1	1	-	1	1	1	1	1	1	1	1	1	1	1	1	1	-	-	1	1	1	-	1	1	1	1	1	1	1	1	1	1	1	1	1	0	1	1	1	1	1	1	1	1	-	-
4301477	TGCAGTGCTACCTCTACACCACCAGCGGGCCCATCGCCGAGATCGGAAGAGCGGTTCAGCAGGAATGCC	-	1	1	1	1	1	1	1	1	-	1	1	1	1	1	1	1	1	1	-	1	1	1	-	1	1	1	1	1	1	1	1	1	1	-	1	1	-	1	1	1	1	1	1	1	1	-	1
4270926	TGCAGCGGAGCGAGATGGCCATGCTCTCGCCCTCCGCGTCGTCTTTGCTCCCCGAGATCGGAAGAGCGG	1	1	1	1	1	-	1	0	1	1	1	1	1	-	1	1	1	1	1	-	1	1	1	1	1	1	1	1	1	1	1	1	1	1	1	1	1	-	1	1	1	1	1	1	1	1	-	1
4298834	TGCAGCGAGAAGACCATCCTAACCGTGAACGGCGAGTTCCCCGAGATCGGAAGAGCGGTTCAGCAGGAA	-	-	1	1	1	1	1	-	1	1	1	-	1	1	1	1	1	1	1	1	1	1	1	-	1	1	1	1	1	1	1	1	1	1	1	1	1	1	-	1	1	1	1	1	1	1	-	1
4279991	TGCAGAGGATGGGCCTTGGCCTGGTCCTCGGCGCAATGGCCATGGCCACCGCCGAGATCGGAAGAGCGG	-	1	1	1	1	1	1	1	1	1	1	1	1	1	1	1	1	1	-	-	1	1	1	-	1	1	-	1	1	1	1	1	1	-	1	1	1	1	1	1	1	1	-	1	1	0	1	1
4293946	TGCAGCTCCATCCCTTGCCCCTGCACCTCGCTGCGGCACAGCCCGAGATCGGAAGAGCGGTTCAGCAGG	1	1	1	1	1	1	1	1	1	1	-	1	1	1	1	1	1	1	1	-	1	1	1	1	1	1	1	1	1	1	-	-	1	1	1	1	1	1	1	1	1	1	1	1	1	1	-	1
4285184	TGCAGGCTGCTCCCGCCAGAGCTCTTGATGCTGATCATCTTGCCACACCGAGATCGGAAGAGCGGTTCA	1	-	1	1	1	1	1	1	1	1	1	1	1	1	1	1	1	1	1	0	-	1	1	1	1	1	1	1	1	-	1	1	1	1	1	1	1	1	-	1	1	1	1	1	1	1	1	1
4280029	TGCAGGAGCTCTTGCTTGACTACACACACTGCAATAAAACTGGAAAGTCGTCGGCAGTGTTATCAGTAC	1	1	1	1	-	1	1	1	1	1	1	-	1	1	-	1	1	1	1	1	1	1	1	1	-	1	-	1	1	1	1	1	1	1	1	1	1	1	1	1	1	1	1	-	1	1	0	1
4273935	TGCAGCAGCTGCTGGTGGGACCGCTTGCAGTGGGCAATGGCGCCCTGGATGGCCCCCTCCTCCGACCCG	1	-	1	1	1	1	1	1	1	1	1	1	1	1	1	1	-	1	1	-	1	1	1	-	1	0	1	1	1	1	1	-	1	1	1	1	1	1	1	1	1	1	1	-	1	1	-	1
4284149	TGCAGGAAGTGGAACGCGTTGACCTGCGACGACGAGCTGTGGCGCAAGCTGTTCGAGGACCGAGATCGG	-	-	1	1	1	1	1	1	1	1	1	1	1	1	1	1	1	1	-	1	1	1	1	-	1	1	1	1	1	1	-	1	1	1	1	1	1	0	1	1	1	1	1	1	1	-	1	1
4276421	TGCAGCGCCAAGGGAGCTCGCCGAGATCCGAAGAGCGGTTCAGCAGGAATGCCGAGACCGATCTCGTAT	1	1	1	-	1	-	1	1	1	1	1	1	1	1	-	1	1	1	1	1	1	1	1	1	1	1	1	1	1	1	1	1	1	1	1	1	1	1	1	1	1	1	1	-	1	1	1	1
4270775	TGCAGACTGCACAGTTCCTCTTACCCGTGTAGACGCCGAGATCGGAAGAGCGGTTCAGCAGGAATGCCG	1	-	1	1	1	1	1	1	0	0	-	1	1	1	1	1	1	1	1	1	1	1	1	1	1	1	1	1	1	1	1	1	1	1	1	1	1	1	1	1	1	1	1	1	1	1	1	1
4294200	TGCAGCGCGAGCTCCTCCGCCTCCGCGTGGCGCTCCGCTGGCGCGGCCGAGATCGGAAGAGCGGTTCAG	1	1	1	-	1	1	1	1	-	1	-	1	1	1	-	1	1	1	1	1	1	1	1	1	-	1	1	1	1	1	-	1	1	1	1	-	1	1	1	1	1	1	1	1	1	1	1	1
4293459	TGCAGGAATATGAGCACGGTGTCTGGGCATTTCAGTACCGAGATCGGAAGAGCGGTTCAGCAGGAATGC	1	-	1	1	1	1	-	-	1	1	1	-	1	1	1	1	1	1	1	1	1	1	1	-	1	1	1	1	1	1	1	1	1	1	1	-	1	1	1	1	1	1	1	1	1	1	-	1
4265864	TGCAGAAGGAAGGGGTGGCCTTGGCCGTTTTCCCATGGCGTTGGACGTTTTCCGAGATCGGAAGAGCGG	-	1	1	1	1	1	-	0	1	1	1	1	1	1	1	1	1	1	1	1	1	1	1	1	1	1	1	1	1	1	1	1	1	1	-	1	1	1	1	1	-	1	1	1	1	1	-	-
4303189	TGCAGCTTGATGATCTTCATGCTGTTGAGCACCTCGGACGTGGACCGAGATCGGAAGAGCGGTTCAGCA	1	-	1	1	1	1	1	1	1	-	1	1	1	1	1	-	1	1	1	1	1	1	-	1	1	1	1	1	1	1	1	1	1	1	1	-	1	1	1	1	1	1	1	1	1	-	1	1
4280092	TGCAGCCTGTCCAGCACGTTCTCCACGCCCACGTCCTCCCGCAGGCTCTCCTCGCAGGCCTTCTTCAGG	1	1	1	1	1	1	1	1	1	-	-	1	1	1	1	1	1	1	0	1	1	1	1	-	1	1	1	1	1	1	1	1	1	1	1	1	1	1	1	1	1	1	-	-	1	1	1	1
4270448	TGCAGCTGCATCGACAACTCTAGGTTCCATAGCACGTCGCCCATGGCCGAGATCGGAAGAGCGGTTCAG	1	1	-	1	1	-	1	1	1	1	1	1	1	1	1	1	-	1	1	1	1	1	1	-	1	1	1	-	1	1	1	1	1	1	-	-	1	1	1	1	1	-	1	1	1	1	0	-
4303073	TGCAGTACGCTGGGAGAGAGCTAGTGGTCACTCACCGACGCCACGCAGCTTGTTCCACGCGGACTCCAG	1	1	1	1	1	1	1	1	1	1	1	1	1	1	1	1	1	1	1	1	1	1	1	-	1	0	1	1	1	1	1	1	1	1	1	-	1	1	1	1	1	1	1	1	1	1	1	-
4296561	TGCAGATTCACGGTGGAGCCACTTGACAGCACAGGGGCACGTTCTACCGAGATCGGAAGAGCGGTTCAG	-	-	1	1	-	1	1	1	1	1	-	1	1	1	1	1	-	1	1	1	1	1	1	1	1	-	1	1	1	1	0	1	1	1	1	1	1	1	1	1	1	1	1	1	1	1	-	-
4304262	TGCAGTCTTTGCAGACACATCACGGGATCACGGCACGATTCTAGCCGAGATCGGAAGAGCGGTTCAGCA	-	1	1	1	1	1	1	1	1	1	1	-	-	1	1	1	-	1	1	1	1	1	1	1	-	1	1	-	1	1	1	1	-	1	-	-	1	1	1	1	1	1	1	1	1	0	1	1
4268605	TGCAGCGAGGAGGAGGGGACGCCCATGGCGTCCTTGAGGAAGAAGTTGACGCCCAGCCACGGGAAGAGC	1	-	1	1	1	-	1	1	1	1	-	1	1	1	1	1	-	1	0	1	1	1	1	1	1	1	1	1	1	1	1	1	1	1	1	-	1	1	1	1	1	1	1	1	1	1	1	1
4304826	TGCAGCCGATCCAGCGACCTGAAGACGAGGTTGAAGTCGTTCCCCGAGATCGGAAGAGCGGTTCAGCAG	-	1	1	-	1	1	1	1	1	1	1	-	1	1	1	1	1	-	1	1	1	1	1	1	1	1	-	-	-	1	1	1	1	1	1	1	1	1	1	1	-	1	1	1	1	1	-	1
4300183	TGCAGCCTGGCGATGAGAAAGGCCGAGATTGGAAGAGCGGTTCAGCAGGAATGCCGAGACCGATCTCGT	1	-	1	1	-	1	-	1	1	-	-	1	1	1	1	1	1	1	1	0	1	1	1	-	1	1	1	1	1	1	1	1	1	1	1	-	1	1	1	1	1	1	1	1	1	1	1	1
4297115	TGCAGGTTTTGGGCCTATGGCTGCTGGTTCAAAGCTTATCCTTCATCACTGCTGGGGTTTCGGTAACCG	1	0	1	1	-	1	1	-	1	1	1	-	1	1	1	-	1	1	1	1	1	1	1	1	1	1	1	1	1	1	1	1	1	1	1	1	1	1	1	1	1	-	-	-	-	-	1	1
4295612	TGCAGAAATGCGCGCAGGGGGCGGCTGTCCACACCACAGCAGCACCGAGATCGGAAGAGCGGTTCAGCA	1	1	1	1	1	1	1	1	1	1	1	-	1	1	1	1	-	1	1	-	1	1	1	1	1	-	1	1	1	1	-	1	1	1	1	-	1	1	1	-	1	1	1	1	1	1	1	1
4289373	TGCAGGGACTGGTGGACATCAACCAGCTGGCCAGCGGCGAGGCCGAGATCGGAAGAGCGGTTCAGCAGG	1	1	-	-	1	1	1	1	-	1	1	1	1	1	-	1	1	1	1	1	1	1	1	1	1	1	1	0	1	1	1	1	1	1	1	1	1	1	1	1	1	1	1	-	1	1	1	1
4277026	TGCAGGACTGCAAGCTCCTCTCCGAGCTCAACGTCGACTTCCTCTCCGCCACCGAGATCGGAAGAGCGG	1	1	1	1	1	1	1	1	1	1	1	-	1	1	1	1	1	1	1	-	1	1	1	1	1	1	1	1	1	-	0	1	1	1	1	1	1	1	1	1	1	1	1	1	1	-	1	1
4273248	TGCAGACCAGACCGCACGCCGCACGATATGCATACCGAGATCGGAAGAGCGGTTCAGCAGGAATGCCGA	1	1	1	1	1	1	1	1	1	1	1	-	1	1	1	1	1	1	-	1	1	1	1	1	1	1	1	1	1	1	1	1	1	1	1	-	1	1	1	1	1	1	1	1	1	1	1	1
4320960	TGCAGCATGAGAGGAAATGCCTGGCATAATCAAATGTGTGGAACCCAATCAAGTCGGCATTCAGCAGCG	-	-	1	1	-	1	1	1	1	1	1	-	1	1	1	1	1	1	1	1	1	1	1	1	1	1	1	1	1	-	-	1	1	1	1	-	1	1	1	-	1	0	1	1	1	-	1	1
4273098	TGCAGGTGACTTGGTGCTCAATGCGTGGTTCGGCATCCCGAGATCGGAAGAGCGGTTCAGCAGGAATGC	1	1	1	1	0	1	1	1	1	1	-	-	1	1	1	1	1	1	-	1	1	1	1	1	1	1	1	-	1	1	-	1	1	1	1	-	1	1	1	1	1	1	1	1	-	0	1	1
4280152	TGCAGGCAGCACCAGTAAATCTTCAGCCGTCTTCACCGAGATCGGAAGAGCGGTTCAGCAGGAATGCCG	1	-	1	1	1	1	1	1	1	1	1	0	1	1	1	1	1	1	1	1	1	1	1	1	1	1	1	1	1	1	1	1	1	1	-	-	1	1	1	1	1	1	1	1	1	1	-	1
4320160	TGCAGATCGATGGATCGAGCTAGCTGTCATCGGCCGCCACCGCCACGGGCGCCGCCGAGATCGGAAGAG	1	1	1	-	1	-	1	0	1	1	1	1	1	1	1	1	1	-	1	1	1	1	1	1	1	1	1	1	1	1	1	1	1	1	1	-	1	1	1	1	1	-	-	1	1	1	1	-
4290417	TGCAGCCCCCACTGCCACACGTGCGCCACCTCGTGGTACAGCACCCCCGTCACCTGCTCCTTGAGGTCG	1	1	-	1	1	1	1	1	1	1	1	1	-	1	1	1	1	1	-	1	1	1	1	1	1	1	1	1	1	1	1	0	1	1	1	1	1	1	1	1	1	1	1	1	1	-	1	1
4296451	TGCAGCCTCCCGCCCCTGCCGCTGCCCTCCTTCTTGGCGTCCTTCTTGCCGAGATCGGAAGAGCGGTTC	-	-	1	1	-	1	1	1	0	1	0	1	1	1	1	1	1	1	-	1	1	1	1	1	1	-	1	1	1	1	1	1	1	1	1	-	1	1	1	1	1	1	-	-	1	-	1	1
4286200	TGCAGCACAACTACTTCACCAACCCGTGGGCCATCGTCTCCGTCGTCGCCGAGATCGGAAGAGCGGTTC	1	1	1	1	1	1	-	1	1	1	1	1	1	1	1	1	1	1	1	1	1	1	1	1	1	1	1	1	1	1	1	1	1	1	-	1	1	1	1	1	1	1	1	1	1	1	0	1
4264053	TGCAGCGGAGCCATGCCTCCCGGCGGAGCAATTCTATCGGCGATTAGTCCGAGATCGGAAGAGCGGTTC	1	-	1	1	-	-	1	1	1	1	1	1	1	1	1	1	1	1	1	1	1	-	1	1	1	1	1	-	1	1	1	1	-	1	1	1	1	1	1	1	1	1	1	1	1	1	1	1
4282999	TGCAGAGGTACCGCGAGGGCGAGGAGCTCGCGGCGGCGCTCAACAACCACAGCAGGTCACCGAGATCGG	1	1	1	1	1	-	1	1	1	1	1	1	1	1	1	1	1	1	1	1	1	1	1	1	1	1	1	1	1	1	1	1	1	1	1	1	1	1	1	1	1	1	1	1	-	1	1	1
4282366	TGCAGACGAAACCCAACGAGGGTCAAGAATATAAACCGAGATCGGAAGAGCGGTTCAGCAGGAATGCCG	1	-	1	1	1	1	1	1	1	1	1	1	1	1	1	1	1	1	1	1	1	1	1	-	1	1	1	1	1	1	1	1	1	1	-	0	1	1	1	1	1	-	1	1	1	1	1	1
4295814	TGCAGCTCAATGGTATGGGTATCAGCGGCGCTGTCGATGAGTGGCCGCGTCCATGCTGACTGAACCCAG	1	-	1	1	-	1	1	1	1	1	1	1	1	1	1	1	-	1	-	1	1	1	1	1	1	-	1	1	1	1	1	1	1	1	1	1	1	1	1	1	1	-	1	1	1	1	1	1
4284519	TGCAGTCCTGCTTGCTGAGTGGCGTGCACCTGTCTGTCACCGTGAGCGTGGCCCGAGATCGGAAGAGCG	1	-	1	1	1	1	1	1	1	1	1	1	1	1	1	1	-	1	-	1	1	1	1	1	1	1	1	1	1	1	1	1	1	1	1	1	1	1	1	-	1	-	1	1	1	-	1	1
4304458	TGCAGCTCGGGACGTGGTACTTGTTCGCGAGCCTGCATGTGTCGCTCTTGCACGGGAACGCCGCCGAGA	1	-	1	1	1	1	1	0	1	1	1	1	1	1	1	1	1	1	1	1	1	1	1	-	1	1	1	1	1	-	1	1	-	1	-	1	1	-	1	1	1	1	1	1	1	1	1	1
4290339	TGCAGTGGGATTCCGTGACAAGCAGCTACATGACATTTGGGACCCGAGATCGGAAGAGCGGTTCAGCAG	1	1	1	1	-	1	1	1	1	1	1	1	1	1	1	1	-	1	1	1	1	1	1	1	1	1	1	1	-	1	1	1	1	1	1	-	-	1	1	1	1	1	1	1	1	1	-	1
4292801	TGCAGGAAATGCAAACTGAACTACCTAGTTTTCAGGGATTTGAGCTTCGGTATGTTAGCCGAGATCGGA	1	1	1	1	-	1	1	1	1	1	1	1	1	1	1	1	1	1	1	1	1	1	1	1	1	1	1	1	1	1	-	1	1	1	1	0	1	1	1	1	1	1	1	1	-	1	1	1
4281478	TGCAGCTTGGAGACTATGGATCTACAGCGGAATTCGCTGCCGAGATCGGAAGAGCGGTTCAGCAGGAAT	1	1	0	1	-	1	1	1	1	1	1	1	1	1	1	1	1	1	1	1	1	1	1	1	1	1	1	1	1	1	1	1	-	1	1	-	1	1	1	1	1	1	1	1	1	1	1	1
4285338	TGCAGCTAGCGGCGAGCGCGGGGGAAGGAGATCGATGGAGGATCTGTACAGCATCCACCCGAGATCGGA	1	1	1	1	1	1	1	1	1	1	1	1	1	1	1	1	1	1	1	-	1	1	1	1	-	1	1	-	1	1	-	-	1	1	1	1	1	1	1	1	1	1	-	1	1	0	-	-
4295124	TGCAGGAGAAGGACAAGTTGGTGGCCGAGGTAATGCGCTACGCGCTCTTCAAGACGCACCAGAACTCCG	1	-	-	1	-	1	1	1	1	1	1	1	1	1	1	1	1	1	1	1	1	1	-	1	1	1	1	1	1	-	1	1	-	1	1	1	1	1	1	1	1	1	1	1	1	1	1	1
4273619	TGCAGCCTCGGGAGGCTGTTCTTTGCCTGCATGGTCGCCGAGATCGGAAGAGCGGTTCAGCAGGAATGC	1	1	1	1	1	1	1	1	1	1	1	1	1	1	1	1	1	-	1	1	1	1	1	1	1	1	1	1	1	1	1	1	1	1	1	1	1	1	1	-	-	-	1	1	1	0	1	1
4297919	TGCAGGAGCTCGTGCAGCCTCCGCTCCAGCACCCGCGCCGAGATCGGAAGAGCGGTTCAGCAGGAATGC	1	-	-	1	1	1	1	1	-	-	-	1	1	1	1	1	-	1	1	-	1	1	-	-	1	1	1	1	1	1	1	1	1	1	1	-	1	1	-	1	-	1	1	1	1	1	-	1
4265331	TGCAGGAGACCATCGCGTCCGTCTGCAAGTCCATCTTCAGCCGCCCCGAGATCGGAAGAGCGGTTCAGC	-	1	1	1	-	1	1	1	1	1	1	-	-	1	1	1	1	1	1	1	1	1	1	1	1	1	1	1	1	1	1	1	1	1	1	1	1	-	1	1	1	1	1	1	1	1	-	1
4291891	TGCAGGTGTATGAGAAGCTGACGGCGAAGATGGAGTCCATCCCGAGATCGGAAGAGCGGTTCAGCAGGA	1	1	1	1	1	1	1	1	1	1	1	1	1	1	1	1	1	1	1	-	1	1	1	1	1	1	1	-	1	1	1	1	1	1	1	1	1	1	1	1	1	1	1	1	1	1	-	1
4292854	TGCAGGCCCAGCGCCATCAGCTTCTTCGGCACCGCCTCCGCTCTCACCAGCCCCGAGATCGGAAGAGCG	1	1	1	1	1	1	1	1	1	1	1	-	1	1	1	1	-	1	1	-	1	1	1	-	1	1	-	1	1	1	1	1	1	1	1	0	1	1	-	1	1	1	1	1	1	1	1	1
4303388	TGCAGGTGCGCAATCTGGAGGACCTGCGCGGCGTCGCGGCCGAGGAGATGGGCATGCCGAGATCGGAAG	1	1	1	1	1	1	1	1	1	1	1	1	1	1	1	1	1	1	1	1	1	1	1	1	1	1	1	1	1	1	-	1	1	1	1	1	1	1	1	1	1	1	1	1	1	1	1	1
4263341	TGCAGGACATAGTCGTGAACGGGACGCAGCTCAACATACCGCCTTCCGCCTTCGCCGCCGAGATCGGAA	1	1	1	1	1	1	1	1	1	1	1	1	1	1	1	-	1	1	1	-	1	1	1	1	-	1	1	1	1	1	1	1	1	-	1	1	1	1	1	1	-	1	1	-	-	-	1	-
4304360	TGCAGGCGTTCGACGACACCAAGGCGGGCGTCAAGGGCCTCGTCGACTCCGAGATCGGAAGAGCGGTTC	1	1	1	1	1	1	1	1	-	-	1	1	-	1	1	1	1	1	1	-	1	1	1	1	1	1	1	1	1	1	1	1	1	-	1	-	1	1	1	1	1	1	-	1	1	1	-	1
4290736	TGCAGGCGACTCGAGAGGCTTCCCTTGGTTATTGGCCGAGATCGGAAGAGCGGTTCAGCAGGAATGCCG	1	-	1	1	1	1	1	1	1	1	1	1	1	1	1	1	-	-	0	1	1	1	1	-	1	1	1	1	1	1	1	-	1	1	1	1	1	1	1	1	1	1	1	1	1	1	1	1
4276086	TGCAGCAACAGCGCGAGCAGCACGCAGAAAATTACGCCGAGATCGGAAGAGCGGTTCAGCAGGAATGCC	1	1	1	1	1	1	-	1	1	1	1	1	1	1	1	1	1	1	1	1	1	1	1	1	-	1	1	1	1	1	1	1	1	1	1	0	1	1	1	1	1	1	1	1	-	-	1	1
4288408	TGCAGACGCGTTGAATCGATTCCTTGGTACGCGGTGATTGCCGAGGGGAGCGAGATGGTAGAGAAGCGC	1	1	1	1	1	1	1	0	1	1	1	1	1	1	1	1	1	1	-	1	1	1	1	1	1	1	1	1	1	1	1	1	1	1	1	1	1	1	1	1	1	1	1	1	1	-	-	1
4292376	TGCAGTTGTTCACCAGGCTGTCCGTGTCCACGTTGCAGACATGGTACCCGAGATCGGAAGAGCGGTTCA	1	1	1	1	1	1	1	1	1	1	1	1	1	1	1	1	1	1	1	-	1	1	1	1	1	1	1	1	1	1	-	1	1	1	-	1	1	1	1	1	1	1	1	1	1	0	-	1
4309738	TGCAGAGGACGGAGCTTTCGAGTGGACGAGGAAATGCCGAGATCGGAAGAGCGGTTCAGCAGGAATGCC	0	1	1	1	-	1	1	1	1	1	1	1	1	1	1	1	-	-	1	1	1	-	1	1	-	1	-	1	1	1	1	1	1	1	1	1	1	1	1	1	1	1	1	1	1	1	0	-
4320071	TGCAGGAATAGCTTGGGCATGACGGCCATGCCCAGCCGGCCAAACGCGTCCTTCCGAGATCGGAAGAGC	1	1	1	1	1	1	1	1	0	1	1	1	1	1	1	1	-	1	1	-	1	1	1	1	1	1	1	1	1	1	1	1	1	1	1	-	1	1	-	1	1	1	1	-	1	1	-	-
4286140	TGCAGCAGCCAGTTCGCCAGGACGCTGAAGAGCGCCGTCTGGTGCTTGACCTCGCCGAGATCGGAAGAG	1	-	1	1	1	-	1	1	1	1	1	1	1	1	-	1	1	1	1	1	1	1	1	1	1	1	1	1	1	-	1	1	1	1	1	1	-	1	1	1	1	-	1	1	1	1	1	-
4296809	TGCAGCGGCGAGTGGTTTTAGGGTTTGAGAGACGAAGCCGAGATCGGAAGAGCGGTTCAGCAGGAATGC	1	1	1	1	1	1	1	-	1	1	1	1	-	1	1	1	-	-	1	1	1	-	1	-	1	1	1	1	1	1	0	-	1	1	1	1	1	1	-	1	1	1	-	1	1	1	1	1
4327644	TGCAGCTCATGCCGCCATCGTGCCACGCAGCGCCGCGCTCACCGCCGAGATCGGAAGAGCGGTTCAGCA	1	-	1	1	1	1	1	1	1	1	1	1	1	1	1	1	-	1	-	1	1	1	1	1	1	0	1	1	1	-	1	1	1	1	1	1	1	1	1	-	1	1	1	1	1	-	1	1
4296993	TGCAGTGCGGCCACGAGTTCCACCTCGGTAAGGGGCTATGGTCCGATCTGTTGATGCGTTATTGCACTG	1	-	1	1	1	1	1	1	1	1	1	0	1	1	1	1	1	1	1	1	1	1	1	1	-	1	1	-	1	1	1	-	1	1	1	-	1	1	1	1	1	-	1	1	1	1	1	1
4284304	TGCAGTTGACGGCGCTGTGCGTGATCTTGAACACCTCCCTCTGCGTGTACCCCAGCGTGCACAGGTGCG	1	-	1	1	1	1	1	1	1	1	1	1	1	1	1	1	1	1	1	1	1	1	1	1	1	1	1	1	1	1	0	1	1	1	1	1	1	1	1	1	1	1	1	1	1	1	1	1
4274313	TGCAGGGTGCTTTAACTGCATGAGTTCAAAATATTGGCGCATGCCAAGCGCAGCTGCCGAGATCGGAAG	1	-	1	1	1	1	1	1	1	1	1	-	1	1	1	1	-	1	1	1	1	1	1	1	1	-	1	1	1	1	-	1	1	-	1	0	1	1	1	1	1	1	1	1	1	-	1	-
4299109	TGCAGACACAACACAGCGCACTGTCTCAGCACAGCCACCGAGATCGGAAGAGCGGTTCAGCAGGAATGC	-	1	1	1	1	1	1	1	1	1	1	1	1	1	1	1	1	1	1	1	1	1	1	1	1	1	1	1	1	1	0	1	1	1	1	1	1	1	1	1	1	1	1	1	1	1	1	1
4303482	TGCAGAAGGTGCCCTCGCAGCGGCACAGGAAGCCCAGCAGCCCCACCTTCTTGCGGCACGCCGCGCACC	1	-	1	1	1	1	1	1	0	1	1	1	1	1	1	1	1	1	1	-	1	1	1	1	-	1	1	1	1	1	1	1	1	1	1	1	1	1	-	1	1	1	1	1	1	1	1	1
4300509	TGCAGCATCTTCGGCCTCCACTCGCCGCTACCCCAACCGAGATCGGAAGAGCGGTTCAGCAGGAATGCC	1	1	1	1	1	1	1	1	1	1	1	1	1	-	1	1	1	1	1	1	1	1	1	1	1	1	1	1	1	1	1	-	1	1	1	-	1	1	1	1	1	1	1	1	-	-	1	1
4275362	TGCAGCCTGCCTCTTCTTTAATTGTAGTATCATGCACTGACCGAGATCGGAAGAGCGGTTCAGCAGGAA	1	1	1	1	1	1	1	1	1	1	1	-	1	1	1	1	-	1	1	1	1	1	1	-	-	1	1	1	1	1	1	1	1	1	1	1	1	1	-	1	1	-	1	1	-	1	0	-
4267808	TGCAGCGCCAGGATGACGATGCAGCCGCCGGCCCCCTTCTTCCGAGATCGGAAGAGCGGTTCAGCAGGA	1	1	-	1	1	-	1	1	1	1	1	1	1	1	-	1	1	1	1	1	-	1	1	1	1	0	1	1	1	1	1	1	-	1	1	1	1	1	1	1	1	1	1	1	1	1	1	1
4268130	TGCAGCGGGATGGGACGGGTGCCGCACGGTTCGGACGTGACCACCGAGATCGGAAGAGCGGTTCAGCAG	1	1	1	-	1	-	1	-	1	1	1	-	1	-	-	1	1	1	1	1	1	-	1	1	1	1	1	1	1	1	1	1	1	1	1	1	1	1	1	1	1	1	1	1	1	1	1	1
4289763	TGCAGTGCAGTGCCACCCAGCTTATATATATCACTTCCATCACCGAGATCGGAAGAGCGGTTCAGCAGG	-	1	1	1	-	1	1	1	1	1	1	-	1	1	1	1	-	1	-	1	1	1	1	1	1	1	1	1	1	1	1	1	1	1	1	-	1	1	1	1	1	1	1	1	1	1	1	-
4290418	TGCAGCTTCGCCTACTACCTGATCCCCAGCTACCTGTTCCCGAGATCGGAAGAGCGGTTCAGCAGGAAT	1	1	1	1	1	1	1	1	1	1	1	1	1	1	1	1	1	1	1	1	1	1	1	1	1	1	1	-	1	1	1	-	1	1	1	-	1	1	1	1	1	1	1	-	1	1	1	1
4327283	TGCAGCCGCAGTAGTAGTAGTAGCAGCCAGTAAGCAGGACCATAATAGTCTGGCGCTCCGAGATCGGAA	1	-	1	1	-	1	1	1	1	1	1	1	1	1	1	1	1	1	1	1	1	1	1	1	1	1	1	1	1	1	1	1	1	1	-	1	1	-	1	1	1	1	1	1	1	1	1	-
4266921	TGCAGTTGAGTCCAAAAGAACCACCATGGTTAGGTTCAAGAGATCAAAGAAGGTCTCAGGAATCGCAAA	1	-	1	1	1	1	1	1	1	0	0	1	1	1	1	1	1	1	-	1	1	1	1	1	1	1	1	1	1	1	1	1	1	1	-	1	1	1	1	1	1	1	1	1	-	1	1	1
4286180	TGCAGCTGAGCACGAACCGAGATCTGAAGAGCGGTTCAGCAGGAATGCCGAGACCGATCTCGTATGCCG	1	-	1	1	1	-	1	1	1	1	1	1	1	1	-	1	1	1	1	1	1	1	1	1	1	1	1	1	1	1	1	1	1	1	1	1	1	1	1	1	1	1	1	1	1	1	1	1
4325669	TGCAGGGCTGGAGGCCGCCGATGAGCTCAAGCTGGACAGCTCCATCGCGGCCTGATCTCTGAGCACTCG	1	1	1	1	1	1	1	1	1	1	1	1	1	1	1	1	-	1	-	1	1	1	1	-	1	0	1	1	1	1	1	1	1	1	1	1	1	1	1	1	1	1	1	1	1	-	-	1
4300298	TGCAGCTAATTTAAACCCGAAAAAATGGTCAACGAACAAAATCAATGAAACGGGAACGGGGGATCTCAC	1	-	1	1	1	1	1	1	1	1	1	1	1	1	1	1	1	1	1	1	1	1	1	-	1	0	1	1	1	1	1	1	1	1	1	-	1	1	1	1	1	1	1	1	1	1	-	1
4303617	TGCAGTTCGAGGTGTACAGCCAGGGCATGTTCAAGACGGAGCTGTGCAACAAGTGGGAGGAGACCGAGA	1	1	1	1	1	1	1	-	1	0	0	1	-	1	1	-	-	1	-	1	1	1	1	1	1	1	1	1	1	1	-	-	1	1	1	1	1	1	1	1	1	1	1	1	1	1	1	1
4272231	TGCAGGCGTTGCCTTCCGAGGCGCACCAGACCCATGGGTATCTCATCTGCGGGCAGAGCAGCCGAGATC	-	1	1	1	1	1	-	-	1	-	-	1	1	1	1	1	1	1	1	-	1	1	1	1	1	1	-	1	1	1	1	1	1	1	1	1	1	1	0	1	1	1	1	1	1	1	1	1
4302062	TGCAGAAAGGGCAGATGAAGAAGGATCAGTTCATCCGAGATCGGAAGAGCGGTTCAGCAGGAATGCCGA	1	-	1	1	1	1	1	1	1	1	1	1	1	1	1	1	-	1	1	-	1	1	-	1	1	1	1	1	1	1	1	1	-	1	-	-	-	1	1	1	1	1	1	1	1	1	-	1
4276036	TGCAGCGCAGCGTTTGCTGTGCATGCACCGCGCATGTGCCTGGTCTCCATCTGTTCGCCTGTGCCCTCC	1	1	1	1	1	1	1	1	1	1	1	1	1	1	1	1	1	1	1	1	1	1	1	1	1	1	1	1	1	1	1	1	1	1	1	1	1	1	1	1	1	1	1	1	1	1	1	1
4298572	TGCAGTGGGTGCGCGACAACCACTACGTCATCTACGACTACTGCCTCGACAGGAGCAACCGAGATCGGA	1	1	0	1	-	-	1	1	1	1	1	1	0	1	1	1	-	1	1	1	1	1	1	1	1	1	1	1	1	1	1	1	1	1	1	1	1	1	-	-	1	1	-	1	1	1	1	1
4268507	TGCAGATAAGAATGTTTTGGTACTACTTGAGTGATCTCTGTCCTTGCAACTCCCTGTATACTTATAGAT	-	1	1	1	1	1	1	1	1	1	1	1	1	1	1	1	1	1	1	1	1	1	1	1	1	1	1	1	0	1	1	1	1	1	-	1	1	1	1	1	1	1	1	1	1	0	-	-
4270286	TGCAGGTAGTCGCCGATGTTCACCACCAGTGCCACCGAGATCGGAAGAGCGGTTCAGCAGGAATGCCGA	1	1	1	1	1	1	1	1	0	1	1	-	1	1	1	1	1	1	1	1	1	1	1	1	1	1	1	1	1	1	1	1	1	1	1	1	1	1	1	1	1	1	1	1	-	1	1	1
4327174	TGCAGGTAGTCGCCGATGTTCACCACCAGTGCCCCCCAGATCGGAAGAGCGGTTCAGCAGGAATGCCGA	1	1	1	1	1	1	1	1	0	1	1	-	1	1	1	1	1	1	1	1	1	1	1	1	1	1	1	1	1	1	1	1	1	1	1	1	1	1	1	1	1	1	1	1	-	1	1	1
4304230	TGCAGCTTGAGGTTCTGAGCAAGATACGCCACCCACACTTGCTGATGCTCCTGGGAGCCTGTCCGAGAT	1	1	1	1	1	1	1	1	1	1	1	1	1	1	1	1	1	1	1	-	1	1	1	-	1	1	-	1	1	-	1	1	1	1	1	1	1	1	-	1	1	1	1	1	1	0	1	1
4285993	TGCAGAACTACCTGGTGTTCCCGGTCAGGGGCTACAGCTTCACCCCGAGATCGGAAGAGCGGTTCAGCA	1	-	1	1	1	1	1	1	1	1	1	1	1	1	1	1	1	1	1	1	1	1	1	-	1	1	1	-	1	1	1	1	1	1	1	1	1	1	1	1	1	1	1	1	1	1	1	1
4282744	TGCAGCCGGTCATTCTCCTCCATCAGCAGCTTGTTCATCGCGGTGAGCTTCCGAGATCGGAAGAGCGGT	-	1	1	1	1	1	1	1	1	1	1	1	1	1	1	1	1	1	1	1	-	1	1	1	-	1	1	1	1	1	1	1	0	1	1	-	1	1	1	1	1	1	1	1	1	-	1	1
4270345	TGCAGAGGTGGCAAGCAGATCGGGGCGGAGGCCTTGGGGGTCCGAGATCGGAAGAGCGGTTCAGCAGGA	1	1	1	1	1	1	1	1	1	1	1	-	1	1	1	1	1	1	1	1	1	1	1	1	1	1	1	1	1	1	1	1	1	1	-	1	1	1	1	1	1	1	1	1	1	1	1	1
4272539	TGCAGTGGTGCTCATTGAGATGCACGATCTGGCAGAGTCCGAGATCGGAAGAGCGGTTCAGCAGGAATG	1	1	1	1	1	1	1	1	1	1	1	1	1	1	1	1	1	1	-	1	1	1	1	-	1	1	1	1	1	1	1	1	1	1	1	0	1	1	1	1	1	1	1	-	1	-	1	1
4328825	TGCAGTTCCACGGGTTCCACGGCGTGAAGCAGGAGGAGAAGAAGCTCGGCCAGAAGTTCGTCATTGACG	-	-	1	1	1	1	1	1	1	1	-	1	1	1	1	1	1	1	-	1	1	1	1	-	1	1	-	1	1	1	1	1	1	1	1	-	-	1	1	1	1	1	1	-	1	1	1	1
4284853	TGCAGGAATCAACAAATGCGTCAACCCACCACGCTCAGAACCGCTGATCCGAGATCGGAAGAGCGGTTC	-	1	-	1	-	1	1	1	1	1	1	1	1	1	1	1	-	1	1	-	1	-	1	1	1	1	1	1	1	1	1	1	1	-	1	1	-	1	1	1	-	1	1	1	1	1	1	1
4284612	TGCAGCTTGCGAGTACGAAAGCCCCAGGTTATACTAGTGACACTGTGCCGAGATCGGAAGAGCGGTTCA	1	1	1	1	1	1	1	1	1	1	1	-	1	1	1	-	1	1	1	1	1	1	1	1	-	1	1	1	1	1	1	1	1	1	1	0	1	1	1	1	1	1	1	1	1	1	-	-
4266140	TGCAGGACGTGTTCACGCGCTGGTCCTTCGACACGACCTGCAACCTCGTCTTCGGCGTCGACTCCGAGA	1	1	1	1	1	-	1	1	1	1	1	1	1	1	1	1	1	1	1	1	1	1	1	1	1	1	1	1	1	-	0	1	1	1	1	1	1	-	1	1	1	1	1	1	1	1	-	1
4274139	TGCAGAAGCTGCGCGACTACGAGGCGCGGCACAGGAAGTGCGGCCCCGAGATCGGAAGAGCGGTTCAGC	1	1	1	1	1	1	1	1	-	1	1	1	-	1	1	1	1	1	1	-	-	1	1	-	1	1	1	1	1	1	1	1	1	1	-	1	1	1	1	1	1	1	1	-	1	1	1	1
4298069	TGCAGGGCGAGGACTCGCAGATTGCAGAACCCCCCTGCAATGACGTCCAGATCGTCGTCGATAACACCG	-	-	1	-	1	1	1	1	1	1	1	1	-	1	1	1	1	1	1	1	1	1	1	1	1	1	-	-	1	-	1	1	-	1	1	1	1	1	1	1	-	1	1	1	1	1	1	1
4302343	TGCAGCCACTACGACGGTCTGGACACTCATCCGTTGGCCTCTCCGAGATCGGAAGAGCGGTTCAGCAGG	1	1	1	1	-	1	-	1	1	1	1	1	-	1	1	1	1	1	1	1	1	1	1	1	1	0	1	1	1	1	1	1	1	-	1	-	1	-	1	1	1	1	1	1	0	1	1	-
4284479	TGCAGATTCCGAAGCAGCTCCCACTTGTTGGAGCGTAGAACGCACAGTTCGGCTTCCACCTTCGCCGAG	-	-	1	1	1	-	1	1	1	1	-	1	1	1	1	1	-	1	0	1	1	1	1	1	-	-	1	1	1	1	1	1	1	1	1	1	1	-	1	1	1	1	1	1	1	1	1	1
4283525	TGCAGCTGGAGGAACTCCAGGACCTTCACCAGCAGCTGGTCCTCGAAGTTGAAGTGGTCCCACCGAGAT	-	1	1	1	1	1	1	1	1	1	1	1	1	1	-	1	1	1	1	1	1	1	1	-	1	1	1	1	1	-	1	-	1	1	1	1	1	-	1	-	1	1	1	1	1	1	1	1
4267463	TGCAGCCACCCGTCGCTCAGCCCTGCCATACTTACCCAGCTCCAAAAACTGAGTGCCGAGATCGGAAGA	1	1	0	1	1	1	1	1	1	1	1	-	1	1	1	1	1	1	1	1	1	1	1	1	1	1	1	-	1	-	1	1	1	1	1	1	1	1	1	1	1	1	1	1	1	-	-	0
4264581	TGCAGCCGCTCCTCTGCGGCTCTTGCGCGGACAAGCAGGGCTGTGGGGTTGGAACGAAAAAGGGCCAGA	1	1	1	1	1	1	1	1	1	1	1	-	1	1	1	1	1	1	1	1	1	1	1	1	1	1	1	1	0	1	1	1	1	1	-	1	1	1	1	1	1	1	-	1	1	1	1	1
4287831	TGCAGGTGCTGGCCATCCTGCCGTCGTACGCGGGCAAGACGGTGCTGGAGCTCGGCGCCGAGATCGGAA	1	1	1	1	1	1	1	1	-	-	1	1	1	1	1	1	1	1	-	1	1	1	1	-	1	1	1	1	1	1	1	1	1	1	-	1	1	1	1	1	1	1	1	1	-	1	1	-
4290880	TGCAGTCGCCGTCCGCCCTGAAGTCCGCGACGAAGTACCGAGATCGGAAGAGCGGTTCAGCAGGAATGC	1	-	0	1	1	1	1	1	1	1	1	1	1	1	1	1	1	1	1	1	1	1	1	1	1	1	1	-	1	1	1	1	1	1	1	-	1	1	1	1	1	1	1	-	-	1	1	1
4325590	TGCAGCTGTGGAAGACGGCCTTCTACGACCAGCAGGCGATGCAGGCCACCGAGTTCCTGCTCAGCGACG	1	1	1	1	-	1	1	1	1	1	1	1	1	1	1	1	1	1	1	1	1	1	1	1	-	1	1	1	1	1	1	1	1	1	1	1	1	1	1	1	1	1	1	1	1	1	1	1
4295456	TGCAGCACAGGTGCCTCCTGTCGCGTGCATCAGGAGAGCAACATAGCAGCGCCGACGAGGCTGCGCCGA	1	1	1	1	1	1	1	1	1	1	1	-	-	1	1	1	1	1	-	1	1	1	1	1	1	1	-	1	1	1	-	1	1	1	1	1	1	1	1	1	1	1	1	1	1	1	1	1
4284553	TGCAGCGGCCTCCGCTCTGAGCTCTGACTAAACATAAATATCATGCCGAGATCGGAAGAGCGGTTCAGC	1	-	1	-	1	1	1	1	1	1	1	1	1	1	1	1	1	1	1	-	1	1	1	0	1	1	1	1	1	1	-	1	1	1	-	1	1	1	1	1	1	1	1	1	1	-	-	1
4300775	TGCAGTCGCTGGGCCAGGCCGTGCACATCATCGCGCCCGACGGCAAGCTACTCTACTGGTGAGCTTCCA	1	-	1	1	1	1	1	1	1	1	1	1	1	1	1	1	1	1	-	1	1	1	-	1	1	1	-	1	1	1	1	1	1	1	1	0	1	1	1	1	1	1	1	1	1	1	-	0
4293659	TGCAGCAGAGTTATAATCATGAGAAATCACATTTCAGATACTAGACGATATCGCCGAGATCGGAAGAGC	1	-	1	1	1	1	1	1	1	1	-	-	-	1	-	1	-	1	1	1	1	1	1	1	1	1	1	1	1	1	1	-	1	1	1	1	1	1	1	1	1	-	1	1	1	1	1	1
4268441	TGCAGTAGCAATTCGTCGAACAGGTGGTGTGCGTCTTCAGGCCTGAGCGTCCCGAGATCGGAAGAGCGG	1	1	1	-	1	1	1	1	1	1	1	1	1	-	1	1	1	1	1	1	1	1	1	-	1	1	-	1	1	1	-	1	1	1	1	1	1	-	1	1	1	1	1	1	1	1	-	1
4265640	TGCAGATCCTTGGGGTCCTTGCCGTCGACGGTGCAGCCGACGCTGACGCAGGTGCCGAGGATCTCCTTG	1	-	1	1	1	1	1	1	1	1	1	1	1	1	1	1	1	1	-	1	1	1	1	1	1	1	1	1	1	1	1	1	1	-	1	-	1	1	1	1	1	1	1	1	1	1	1	1
4308805	TGCAGAGGCTCTCAGGACGAGCAAGCGAGAGATGTCAGTCGCCACAAGAGGTGAGAGCAAAATCTCCTC	1	1	1	1	-	1	-	1	1	1	-	-	1	1	1	1	1	1	1	1	1	1	1	1	1	1	1	1	1	1	1	1	-	1	1	0	1	1	-	1	1	1	1	1	1	1	1	1
4277660	TGCAGCAAACGGCCATACCTGTCCCGAGATCTGAAGAGCGGTTCAGCAGGAATGCCGAGACCGATCTCG	1	1	1	1	1	1	1	1	1	1	1	1	1	-	1	1	1	1	1	-	1	1	1	1	1	1	-	1	1	1	1	-	1	1	1	0	1	1	1	1	1	1	1	1	1	1	1	-
4286706	TGCAGTGCGCACCGGACGCCAGGTTCAGCCCCCAGCTGTTCGACCTCCGAGATCGGAAGAGCGGTTCAG	1	1	1	-	1	1	1	-	1	1	1	1	1	1	1	1	-	1	1	1	1	1	1	1	1	0	1	1	1	-	1	1	1	1	1	1	1	1	-	1	1	1	1	1	1	1	1	1
4285533	TGCAGGCAATAATCAATTCAGCTGCATGCCCACTGTTGCGCCGAGATCGGAAGAGCGGTTCAGCAGGAA	-	-	1	1	1	1	1	1	1	1	1	1	1	1	1	1	1	1	1	1	1	1	1	1	1	1	1	1	-	1	-	1	1	1	1	1	1	1	1	1	1	1	1	1	1	1	0	-
4292016	TGCAGGTGGCCGCTCCCGTGCTGGAGTCCGTCGTCTACCACGGCGACGTCCTCCTCATCTGGAGAGAGG	1	-	1	1	1	1	1	1	1	1	1	1	1	1	1	1	1	1	1	1	1	1	1	1	1	1	1	1	1	1	-	1	1	1	1	1	1	1	1	1	1	1	1	-	1	1	1	1
4302061	TGCAGCGCTTCGGCGAGCTCGACGCCGCCAAGGCTCTCCTGCCGAGATCGGAAGAGCGGTTCAGCAGGA	1	-	1	1	1	1	1	1	-	1	1	-	1	1	1	1	1	1	1	1	1	1	1	1	1	1	1	-	1	1	1	1	1	1	1	1	1	1	1	1	1	1	1	1	1	1	1	1
4283278	TGCAGCAGGTCGACGCTAATGCCATGGCCGTGGATGAGCCCGAGATCGGAAGAGCGGTTCAGCAGGAAT	1	-	1	1	1	1	1	1	1	1	1	0	-	1	1	-	1	1	1	1	1	1	1	1	1	1	1	1	1	1	1	1	1	1	1	1	1	1	1	1	1	-	1	1	-	1	1	1
4292178	TGCAGTTTTTTGCTGCAAGAAGTGTTGTTGTCCTTACTGACGACGCATCCCCGAGATCGGAAGAGCGGT	1	1	1	1	-	1	1	1	1	1	1	-	1	1	1	1	1	1	-	1	1	1	1	1	1	1	1	1	1	1	1	1	1	-	1	1	1	1	1	1	1	-	1	1	1	1	0	1
4269779	TGCAGCCCTTGCTGTTCGACGACACGGACAAGGGCGGCGTCAGCACCCGAGATCGGAAGAGCGGTTCAG	-	1	1	1	1	1	1	-	1	1	1	1	1	1	1	1	1	1	1	1	1	1	1	-	1	1	1	1	1	1	1	1	-	1	1	1	-	1	1	1	1	1	1	1	1	1	0	1
4304122	TGCAGGTGTTGCTCACTCTTCTTACCGTGTGAACTCGATGTCGATGATGCCGAGATCGGAAGAGCGGTT	1	1	1	-	1	1	1	1	1	1	1	-	1	1	1	1	1	1	1	-	1	1	1	1	1	1	1	1	-	1	0	1	1	1	1	1	1	1	1	1	1	1	1	1	-	1	1	-
4299462	TGCAGGAAGTATACCTCCAGGCAGCTGATGGTGGATACACATACGGCCGAGATCGGAAGAGCGGTTCAG	1	1	1	1	1	1	1	-	1	1	-	-	1	1	1	-	-	1	1	1	1	1	1	1	1	1	1	1	1	1	1	1	1	1	-	1	1	-	1	1	1	1	1	1	1	0	-	-
4276248	TGCAGGTACCAGGCCTTTGAGCTCATCCATGCCAGGTGGGCCATGCTCGGCGCCGCCGAGATCGGAAGA	1	1	1	1	0	1	1	1	1	1	1	-	1	1	1	1	1	1	1	1	1	-	1	-	1	1	1	1	1	1	1	1	1	1	-	1	1	1	1	1	1	-	1	1	1	1	1	1
4291130	TGCAGCAGCGTCGACGGGAACGAACGAGGAAGGTCCGAGATCGGAAGAGCGGTTCAGCAGGAATGCCGA	1	1	1	1	1	1	1	1	1	1	1	1	1	1	1	1	-	1	1	1	1	1	1	1	1	1	1	1	1	1	1	1	1	1	1	1	1	1	1	1	1	1	1	1	1	1	1	1
4302034	TGCAGCGGATGATGAGCTGATATACCCAGATGTGATGGCACCGAGATCGGAAGAGCGGTTCAGCAGGAA	1	-	1	1	-	1	1	-	1	1	1	1	1	1	1	1	1	-	-	1	1	1	-	-	1	1	1	1	1	1	1	1	1	1	1	1	1	1	1	1	1	1	-	1	1	1	0	1
4283000	TGCAGGTGGGTTCGGGTCAACCTTGCTGGGCCTGAACAAGAAGACGTACGAGCTGGCCGAGATCGGAAG	1	-	1	1	1	1	1	1	1	1	1	1	1	1	1	1	-	1	-	1	1	1	1	1	1	1	-	1	1	1	1	1	1	1	1	-	1	1	1	1	1	1	1	1	1	1	0	1
4281449	TGCAGTCATGTCATGCATGGCGTCGCCACCCGCCGATACGCGCAGCGCGTGTCCGAGATCGGAAGAGCG	1	1	0	1	1	1	-	1	1	1	1	1	1	1	1	1	1	1	0	1	1	1	1	1	1	-	1	1	-	1	1	1	1	1	1	1	1	1	1	1	1	1	1	1	1	1	1	-
4293849	TGCAGTGTTCAGCTACGCGAGCAAGGTGCACACGGTGACGGAGGTGAGCCAGGGAGGCTACACGTCCTG	1	-	1	1	-	1	1	1	1	1	1	1	1	1	1	-	1	1	-	-	1	1	1	1	1	1	1	0	1	1	0	1	1	1	1	1	1	1	1	1	1	1	1	1	1	1	1	1
4270858	TGCAGCCGCCTCCTCTCCGACCCCGCCTTCCGCCGCCGCTTCCGCATCCACCACCGCCGCAGCGCTCTC	1	1	1	1	1	1	1	0	1	1	1	1	1	1	1	1	1	1	1	1	1	1	1	1	1	1	-	1	1	1	1	1	1	1	1	1	1	1	1	1	1	1	1	-	1	-	1	1
4291559	TGCAGAGCCCGGCGACGCACAAGGACGTCGGGATCTACCGAGATCGGAAGAGCGGTTCAGCAGGAATGC	-	-	1	1	1	1	-	1	1	1	1	1	1	1	1	1	1	1	1	1	1	1	1	1	1	1	1	1	1	1	1	1	1	1	1	1	1	1	1	1	1	1	1	1	1	1	1	1
4298655	TGCAGCACCGCCGTGTGCTCCTTCTTCTTCTCGCGGTACTTGCGCACGGCCGCCCGAGATCGGAAGAGC	1	-	-	1	1	1	1	1	1	1	1	1	-	1	1	1	1	1	1	1	1	1	1	1	1	1	1	-	1	-	0	-	1	1	1	1	1	1	1	1	1	1	-	1	1	-	1	1
4299068	TGCAGAGATTGCCGGCGACGACATGGATTTCTTCAGAGTGCTTGTTCGACGAGGGGCCTCTACAACCGA	1	-	1	1	1	1	1	1	-	1	1	1	1	1	1	1	1	1	1	1	1	1	1	-	1	1	1	1	1	1	1	1	1	1	1	1	1	1	1	1	1	1	1	1	1	1	1	-
4300023	TGCAGTACGGGAACAAAAGCAACTTAGGACGGCCATGGATCACCAACCGAGATCGGAAGAGCGGTTCAG	1	-	1	1	1	1	1	1	1	1	1	-	1	1	1	1	-	1	-	1	1	1	1	-	1	1	1	1	1	1	1	1	1	1	1	1	1	1	1	1	1	1	1	1	1	1	1	-
4283528	TGCAGCGCCGCCCCTTCATGTACGTCGTGCGCGACCTCCGAGATCGGAAGAGCGGTTCAGCAGGAATGC	1	-	1	1	1	-	1	1	1	1	1	1	-	1	1	1	1	1	1	1	1	1	1	1	1	1	1	1	1	1	0	1	1	1	1	1	1	-	1	1	1	1	1	1	1	1	0	1
4302644	TGCAGCGCATGGGCATCGGCCTGGTGATATCCATCTTCTCCATGGTGGCCGCCGAGATCGGAAGAGCGG	1	-	1	1	1	1	1	-	1	-	-	1	1	1	1	1	1	1	1	-	1	1	1	1	1	1	1	1	1	1	1	1	1	1	1	-	1	1	1	1	1	1	1	1	1	1	-	1
4287130	TGCAGCGTGCTATGAGTGGCGAATTATTTACATTACCGAGATCGGAAGAGCGGTTCAGCAGGAATGCCG	1	-	1	1	1	1	1	1	1	1	1	-	1	1	-	1	-	1	1	-	1	1	1	-	1	1	1	1	1	1	-	1	1	1	-	1	1	1	1	-	1	1	1	1	1	1	1	1
4291464	TGCAGTAGGAGTAGGAGTGAGCGAGGCACGTCGAGCGTATAGTGCACCGAGATCGGAAGAGCGGTTCAG	1	1	0	1	-	1	1	-	1	1	1	1	1	1	1	1	1	1	1	1	1	1	1	1	1	1	1	-	1	1	1	1	1	1	1	1	1	1	1	1	1	1	1	1	1	1	1	0
4280952	TGCAGCCTCTCCTTCTTCACCTCCCTCAGGCGCTCCTCCTCCTGTGCCGAGATCGGAAGAGCGGTTCAG	1	1	1	1	1	-	1	1	1	1	1	1	1	1	1	1	1	1	-	1	1	1	1	1	1	1	1	1	1	1	1	1	1	1	1	1	1	1	1	1	1	1	1	1	1	1	1	1
4326234	TGCAGTTCAAGGAGGTGGAGAAGATGCTTGGGAGCAAGAACTACAGGCCTTGGAAGCGGTACCACCCGA	-	1	1	1	-	1	1	1	1	1	-	1	1	1	1	1	1	1	-	1	1	1	-	-	1	1	1	1	1	1	-	1	1	1	1	1	1	1	1	1	1	1	1	-	-	1	0	-
4328725	TGCAGAGGAAGGCGATGTTGACGAAGGCGTAGTTGCCGAGATCGGAAGAGCGGTTCAGCAGGAATGCCG	1	1	1	1	1	1	1	1	1	1	1	-	-	1	1	1	1	1	1	1	-	1	1	1	1	1	1	1	1	1	1	1	-	1	-	1	1	1	1	-	1	1	1	-	1	1	1	1
4282234	TGCAGAGTATTCGCTTCCATCTATCGCGCGCTGTTGGCGCACCCAAATGTTCAAACACTACGGCTCAAT	1	1	1	1	-	1	1	1	1	1	1	-	1	1	1	-	-	-	1	1	1	1	1	1	-	1	1	1	1	1	1	1	1	-	1	1	-	1	1	1	1	1	1	1	1	0	1	1
4294055	TGCAGGGGTGTTGCGAGGAGTTAGAGGTCGTGCGCCGAGATCGGAAGAGCGGTTCAGCAGGAATGCCGA	-	0	1	1	1	1	1	1	1	1	1	1	1	1	1	1	1	1	1	1	1	1	1	-	1	1	1	1	-	1	1	1	1	1	1	1	1	-	-	1	1	1	1	1	1	1	0	1
4282382	TGCAGCAGCCAGATTTCGTGCGATTTGACGGACGCCGAGATCGGAAGAGCGGTTCAGCAGGAATGCCGA	-	-	1	-	1	1	1	1	1	1	1	1	1	1	1	1	1	1	1	1	1	-	-	-	1	1	1	1	1	1	0	1	1	1	1	1	1	1	1	-	1	1	1	1	1	1	1	1
4272269	TGCAGCTCAGCACCAACAAGCTCACCGGTGTCATCCCGCCGAGATCGGAAGAGCGGTTCAGCAGGAATG	-	1	1	1	1	1	1	1	1	1	1	1	1	-	1	1	0	1	1	-	1	1	1	1	-	1	1	1	1	1	1	1	1	1	1	1	1	1	1	1	-	1	1	1	1	1	1	1
4265174	TGCAGCGGCGCCTCGCTCACATGGGCTTCCCACACCCGAGATCGGAAGAGCGGTTCAGCAGGAATGCCG	1	1	1	1	-	1	1	1	1	1	1	1	1	1	1	1	1	1	1	1	1	1	1	1	1	1	1	-	1	1	-	1	1	-	0	-	1	-	1	1	1	-	1	1	1	1	1	1
4327034	TGCAGTCCTCCACACTGCCTCCCCAGTGCCCAAATCCGCGACCCGAGATCGGAAGAGCGGTTCAGCAGG	1	1	1	1	1	1	1	0	1	1	1	1	1	1	1	1	1	1	1	1	1	1	-	1	1	1	1	1	1	1	1	1	1	1	1	1	1	1	1	1	1	1	1	1	1	1	1	1
4269922	TGCAGCTTCTCGTTGAGGAGCACGAGGGGGTCCTTGTCCCTGAGCACGCCGTCGTCGTCGTACGCGTCC	1	1	1	1	-	1	1	1	1	1	1	1	1	1	1	1	1	-	1	-	1	1	1	1	0	1	1	1	1	1	1	-	1	1	-	1	1	1	1	1	1	1	1	1	1	1	1	1
4283459	TGCAGCGCCAGCATCGCCACGTGGAGCTGCGCCTTCTCCGAGATCGGAAGAGCGGTTCAGCAGGAATGC	-	-	1	1	1	1	1	1	1	1	1	1	1	1	1	1	1	1	1	1	1	-	1	1	1	1	1	1	-	-	0	1	1	1	1	1	1	1	1	1	-	1	1	1	1	0	-	1
4272510	TGCAGCCTGACATGGTTGGATGAAGAGCACATGCTTTCGCACCCGAGATCGGAAGAGCGGTTCAGCAGG	1	1	-	1	-	1	1	1	1	1	1	1	1	1	1	1	1	1	1	1	1	1	1	-	-	1	1	1	1	1	1	1	1	1	1	-	1	1	1	1	1	1	1	1	1	1	1	1
4292766	TGCAGGTCCTGCACCAGACCATGCCCTGCACGCCGATGCTGAAGTTCACCGAGATCGGAAGAGCGGTTC	-	1	1	1	1	1	1	-	1	1	1	1	1	1	1	-	1	1	1	1	1	-	1	1	-	1	-	1	1	1	1	-	1	1	1	1	1	1	1	1	1	1	1	1	1	1	1	1
4282863	TGCAGCTGCAAAGGAATGATAACTGCCCAACTCTGAAAAGTTCCGAGATCGGAAGAGCGGTTCAGCAGG	-	1	1	1	1	1	1	1	1	1	1	-	1	1	1	1	1	1	-	1	1	-	1	1	1	1	1	1	-	1	1	1	1	1	1	1	1	1	1	1	0	1	1	1	-	1	1	-
4281139	TGCAGGTGCTGGACCTGTTCACCGCCAGCATCGTCTCCGTCGCGGACGACTACGTCGCGCCGAGATCGG	1	1	1	1	1	1	1	1	1	1	1	1	1	1	1	1	1	1	1	-	1	1	1	1	1	1	1	1	1	1	1	1	1	1	1	1	1	1	1	1	1	1	1	1	1	1	1	-
4277837	TGCAGATGCCCTGGGTCTCCACCCGCACCACGCCCTTCCTGAAGGTGAAGAGCTCCGAGATCGGAAGAG	1	1	1	1	1	1	-	1	1	1	1	1	1	1	1	1	1	-	1	1	1	-	1	-	1	1	1	1	1	-	1	-	1	1	1	1	1	1	-	1	-	1	1	1	1	1	0	1
4283859	TGCAGGAATCTCCAGATGGAGTACGTGGACCTGTACCTTGTCCACTGGCCGAGATCGGAAGAGCGGTTC	-	1	1	1	-	1	1	1	1	1	1	-	-	1	1	1	-	1	1	1	1	1	1	1	1	1	1	1	1	1	1	1	1	-	1	-	1	-	1	1	1	-	1	1	-	1	1	1
4265375	TGCAGGGCTCATGACCTGTGTGGGGGATGCAAGCAATTATTTGAAACAATCCGAGATCGGAAGAGCGGT	1	1	1	1	1	1	1	1	1	1	1	1	1	1	1	-	1	1	1	1	1	1	1	1	1	-	1	1	1	1	1	1	1	1	1	1	1	1	-	1	-	1	1	1	1	0	-	-
4278647	TGCAGCTGCGGACAAACGCACACGCACACATCCATCGGTCACCAGTTCCCAAACCCACCCGAGATCGGA	1	1	1	1	1	1	1	1	1	1	1	1	1	1	1	1	1	1	1	1	1	1	1	-	1	1	1	1	1	1	1	1	1	1	1	1	1	1	1	1	1	1	1	1	1	-	1	1
4291695	TGCAGCACTGCTTGCCCGACCAGGAGGTCGACACCGCCGCCGCCGCTACCAAGTCCGAGATCGGAAGAG	1	1	1	1	1	1	1	1	1	1	-	-	1	1	1	1	1	1	1	1	1	1	1	-	-	1	1	1	1	1	1	1	1	1	1	1	1	1	-	1	1	1	1	1	-	1	1	1
4290809	TGCAGCGGACCCGGAGCACGGCGTAGCCGAGCACCCGAGATCGGAAGAGCGGTTCAGCAGGAATGCCGA	1	-	1	1	1	1	1	1	1	1	1	1	1	1	1	1	1	1	1	1	-	1	1	1	1	1	1	1	1	1	1	1	1	1	1	1	1	1	1	1	1	-	1	1	1	0	1	1
4294458	TGCAGCAGGCCGTTGAAGCCGGCGGAGGGCGAGGGCAGCGCGCCGAGATCGGAAGAGCGGTTCAGCAGG	1	1	1	1	1	1	1	1	1	1	1	1	1	1	1	1	1	1	1	1	1	1	1	1	1	1	1	1	1	0	1	-	1	1	1	-	1	1	1	1	-	1	-	1	-	0	1	1
4301660	TGCAGGTGCCGGAGCTGGGGTGGGAGTCCATGACGGTGGTGGTGACGCCGCAGGACGTCGGCCGAGATC	1	1	1	-	1	1	1	1	1	1	1	-	1	1	1	1	1	1	1	1	1	1	1	1	1	1	1	1	1	1	-	0	-	1	-	1	1	1	1	1	1	1	-	-	1	1	-	1
4296755	TGCAGTGGGTGTCTGTCCATGGCCCATCGGTGAGCTGGTCCACGCCGAGATCGGAAGAGCGGTTCAGCA	-	1	1	1	1	-	1	-	1	1	1	1	1	1	1	1	1	1	1	0	1	1	1	-	1	1	1	1	1	1	1	1	1	1	1	-	1	1	1	1	1	1	1	1	1	1	1	1
4291987	TGCAGGAAGGTGAGCCCCAGCGTGGTCGACACGCTCACCGACTGCCCCGCCGACCGTATCTCCATCGGG	1	-	1	1	-	1	1	1	1	1	1	1	1	1	1	1	1	1	1	1	1	1	1	1	0	1	1	1	1	1	1	1	1	1	-	-	1	1	1	1	1	1	1	1	-	1	1	1
4272358	TGCAGATGGTTGCGAATCGCGGTGGCGCTATTTGTAGTCGCGGCCCAGATCGGAAGAGCGGTTCAGCAG	1	1	1	1	-	1	1	1	1	1	1	-	1	1	1	1	1	1	1	1	1	1	1	1	1	1	1	1	-	1	1	1	1	1	1	-	1	1	-	-	1	1	1	1	1	1	1	1
4282064	TGCAGCAGCAGCGAGTTGTTGATCACCTGCACGTTGCTGTTGATCAGCGCCCTCATCATCCCCTGCTTC	1	-	1	1	1	1	1	1	1	1	1	1	1	1	1	1	1	1	1	1	1	1	1	1	1	1	1	1	-	1	1	1	1	1	1	-	1	1	1	1	1	1	1	1	1	-	1	1
4281059	TGCAGGCAGTACGGGGGCAGTGGTGGCGGCGCGAGTTCACAAGGGAACATCTCCTCTTCTCCGAGAAAC	1	1	1	1	-	1	1	1	1	1	1	-	1	1	1	1	1	1	-	1	1	1	1	-	1	0	1	1	1	1	1	1	1	1	1	1	1	1	-	1	1	1	1	1	1	1	1	1
4299210	TGCAGGTTTGCAGTTGATCAACGAACAGAGACGTTTTTCATCTTTCCGAGATCGGAAGAGCGGTTCAGC	-	-	1	1	-	1	1	-	1	1	1	1	1	1	1	1	-	1	1	-	1	1	1	1	1	1	1	1	1	1	-	1	1	1	1	0	-	1	1	1	1	-	1	1	-	1	1	1
4298438	TGCAGCATGATTCAATTGAAGCTGTTGTAATTGGAGTTGTAATTTTGAGCCCTGAAAAAGGGGATTTTG	1	1	1	1	-	1	1	1	1	1	-	-	1	1	1	1	1	1	1	1	1	1	1	-	1	1	1	1	1	1	1	1	1	1	-	0	1	1	1	1	1	1	1	1	1	1	1	1
4321615	TGCAGCCGAGCCGCCCACCCACGGGTTGCCGAGTTTGGTATCGGCCGAGATCGGAAGAGCGGTTCAGCA	1	-	1	1	1	1	1	1	1	1	-	1	1	1	1	1	1	1	1	1	1	1	1	1	1	1	1	1	-	1	1	1	1	1	1	-	1	-	1	1	1	1	-	1	1	0	1	1
4320560	TGCAGGCCTCCCAGACGTGGACTCTGCTCAAGGTGCAGCAGCTGCTGGGCCGAGATCGGAAGAGCGGTT	1	-	1	1	1	1	1	1	1	1	1	1	1	1	1	1	1	1	1	1	1	1	1	1	1	1	-	1	1	1	1	1	1	1	1	1	1	1	1	1	1	1	1	1	1	0	1	1
4293445	TGCAGGAATATAGTACCGCAGAAGCGTTGGTTCTTGATTTGGGTGACGGCGCCCTGGGCCCTCCAGTCC	1	-	1	1	1	1	1	1	1	1	1	1	1	1	1	1	1	1	1	1	1	1	1	1	-	1	1	1	1	1	0	1	1	1	1	-	1	1	1	1	1	1	1	1	1	1	1	1
4278168	TGCAGCGCCTCCGCGAGCACCGCGGCACCCGCGCGCCCGAGATCGGAAGAGCGGTTCAGCAGGAATGCC	1	1	1	1	-	1	1	-	1	1	1	1	1	1	1	1	1	1	1	1	1	1	1	1	1	1	1	1	1	1	1	1	1	1	1	1	1	0	1	1	1	1	-	-	1	1	1	1
4289469	TGCAGCTGGCTGATGACCCCGGTGCATCCGTACACCGAGATCGGAAGAGCGGTTCAGCAGGAATGCCGA	1	1	1	1	1	1	1	-	1	1	1	1	1	1	1	1	1	1	1	1	1	1	1	1	1	1	-	-	-	1	0	1	1	1	1	1	1	1	1	1	1	1	1	1	1	1	1	1
4284937	TGCAGGAACCGCCCATGCTTGCCAAGAGTCAGCCATTCCGAGATCGGAAGAGCGGTTCAGCAGGAATGC	1	-	1	1	1	1	1	-	1	1	1	1	1	1	1	1	1	1	1	1	1	-	1	1	-	1	1	1	1	1	1	1	1	1	1	1	1	1	1	1	1	1	1	1	1	0	0	1
4264295	TGCAGATCATTGCCGTGCACTCGTCCACGCCCAGCTCGTGAGAGCCCAGCCTGCTCAGCGTCCGCCTCA	1	1	1	1	-	1	1	1	1	1	1	1	1	1	1	1	1	1	-	1	1	1	1	1	1	1	1	1	1	1	-	1	1	1	1	1	1	-	1	-	1	-	1	1	1	1	1	-
4292879	TGCAGTTCCAAGAGCGTGGCCATCAATTCGCATGGTTGAGACGGGTGAATCACTTGTACCGAGATCGGA	-	-	-	-	1	1	1	1	1	-	-	-	1	1	-	1	1	1	0	1	1	1	1	-	1	1	1	-	1	1	1	1	1	-	1	1	-	1	1	1	1	1	1	1	1	1	1	1
4319282	TGCAGGACTTCTTCGTCTACAACGCCAACAACCCTTCCTCGCTCATAGCGCTCCCAGCTTGCACCGAGC	1	-	1	1	1	1	1	0	1	1	-	1	1	1	1	1	1	1	1	1	1	-	1	-	1	1	1	1	1	1	-	1	1	1	1	1	1	1	1	1	1	1	1	1	1	-	1	1
4297405	TGCAGAAGCCCCGCGACCTGCGAATCGCACGTCGTCGTGTACCCGAGATCGGAAGAGCGGTTCAGCAGG	1	-	1	1	-	1	1	1	1	1	1	1	1	1	1	1	1	1	1	1	1	1	1	1	1	1	1	1	1	1	1	1	1	1	1	1	1	1	1	1	1	-	1	1	1	1	-	1
4296606	TGCAGCAACTTCTCCAGAGCGGAGACCACAGCAGCATGGCTCTGGTCGCCCACAATCTCCGGGATCGAC	1	-	1	1	1	1	1	1	1	1	1	1	1	1	1	1	-	1	1	1	1	1	-	-	1	1	1	1	1	1	1	1	1	1	1	-	1	1	1	1	1	1	1	1	-	0	1	1
4293261	TGCAGGTGGCCATAGTACTGAGCCTATTTGGCCTCATGGGCGCATACACTGCCGAGATCGGAAGAGCGG	1	-	1	1	-	1	1	1	1	1	1	1	1	1	1	1	1	1	1	1	1	-	1	-	1	1	-	1	1	1	1	1	1	1	1	1	1	0	0	1	1	1	1	1	1	1	1	1
4287355	TGCAGGAGCCGGAAAGCGGCGGCCTTGTTCATCTCCGCGATTTGGCGTTCCCCGAGATCGGAAGAGCGG	1	1	1	1	1	1	1	-	1	1	1	1	1	1	1	-	1	1	1	1	-	-	-	1	1	1	-	1	1	1	1	1	1	1	1	1	1	1	1	-	-	1	1	1	1	1	1	0
4290290	TGCAGCCTAAAAATTATCTGATCACTGACCTCCCCGTCCCCGAGATCGGAAGAGCGGTTCAGCAGGAAT	1	1	1	1	-	1	1	1	1	1	1	-	1	1	1	1	1	1	1	1	1	1	1	1	1	1	1	1	-	1	1	-	1	1	1	1	1	1	1	1	1	1	1	1	-	0	0	-
4300505	TGCAGCCTCCCTCCTCTAGCGCGTCCCCTTATCCCAACCACTGCTACGTTCCCCACCGCCGAGATCGGA	-	1	1	1	1	1	1	1	1	1	1	1	1	1	1	1	-	1	1	1	1	1	1	-	1	1	1	1	1	1	1	1	1	1	1	1	1	1	1	1	1	1	-	1	1	-	0	1
4301948	TGCAGGCTGCTTTTGGCATTCTGAAAAAATGTTTGTCTTACGCATGGGGTCCCACCGAGATCGGAAGAG	1	-	1	1	-	1	1	1	1	1	1	-	1	1	1	1	1	1	1	1	1	1	1	1	1	1	1	1	1	1	1	1	1	1	-	1	1	1	-	1	1	1	1	1	1	1	0	1
4277682	TGCAGTCCGAGCAAGCTAAACTCTTTGTTGGTGCAGTCCAGAGGATTATTATTCCGAGATCGGAAGAGC	1	-	1	1	1	1	-	-	1	1	1	1	1	1	1	1	1	1	1	0	1	1	1	1	-	1	1	1	1	1	1	1	1	1	1	-	1	1	1	1	1	1	1	1	1	1	1	1
4275041	TGCAGCAGTTCGGCAGCTCCTCCTGGTTCGCCTGCTCCCAGGCCTCCAGCGCCGCCACCGAGATCGGAA	1	1	1	1	1	1	1	1	1	1	-	-	-	1	-	1	1	-	1	-	1	1	1	1	1	1	1	1	1	1	1	-	-	1	1	1	1	1	1	1	1	1	1	1	1	1	1	1
4276994	TGCAGTCCGCCTCCGCCAAGCCTTGCTCAGATGCTGGACTTGATGCCGAGATCGGAAGAGCGGTTCAGC	1	1	1	1	-	1	1	1	1	1	1	1	1	1	1	1	1	1	1	1	1	1	1	1	1	1	1	1	1	1	1	-	1	1	-	1	1	1	1	1	1	1	1	1	1	-	0	1
4323482	TGCAGGAACTTCTGCGTGGGGAAGGTGAGCGCGAGCGAGAACATCTGCGGGAGGATGCGGAGCGTGAAG	1	1	-	1	-	1	1	1	1	1	1	1	1	1	1	1	1	1	1	1	1	-	1	1	1	0	1	1	1	1	-	1	1	1	-	1	1	1	1	1	1	1	-	-	1	1	-	-
4299657	TGCAGATTTCGGTGTGGAAGAAATTCAACCTGATCTTCCTCTTCTTCCTACTCCGAGATCGGAAGAGCG	1	1	1	1	1	1	1	1	1	1	1	-	1	1	1	1	-	1	-	0	1	1	1	-	1	1	1	1	1	1	1	1	1	1	1	1	1	-	1	1	1	1	1	1	1	-	1	1
4287961	TGCAGCATGCACTGTTTTTGTCACTGTTTTTGTGCCGAGATCGGAAGAGCGGTTCAGCAGGAATGCCGA	1	1	1	1	1	1	1	1	1	1	1	0	1	1	1	1	1	1	1	1	1	1	1	1	1	-	1	1	-	1	1	1	1	1	1	1	1	1	-	1	1	1	1	1	-	1	1	1
4268454	TGCAGCAGGAGCATCAGCAGAGCACATGCTTGGAATGGAAGGCCGAGATCGGAAGAGCGGTTCAGCAGG	1	1	1	1	1	1	1	1	1	1	1	1	1	1	1	1	1	1	1	1	1	1	1	1	1	1	1	1	1	1	1	1	1	1	1	0	1	-	1	1	1	-	1	1	-	1	-	1
4286376	TGCAGCGGGATCACCACCATGAGCACCTTCTTCTCCCGAGATCGGAAGAGCGGTTCAGCAGGAATGCCG	1	1	-	1	1	-	1	1	1	1	1	1	1	1	1	1	1	1	1	1	1	1	-	1	1	1	1	1	1	1	0	1	1	1	1	1	1	1	1	1	1	1	1	1	1	1	1	1
4293973	TGCAGAGGCCGGGCGCACGACGCTGCTGCTGAGGCTGCGCGTCGAGGGGCAGCTCCGAGATCGGAAGAG	1	1	1	1	1	1	1	1	-	1	1	1	1	1	-	1	1	1	-	1	1	-	1	1	1	1	1	1	1	1	0	1	1	1	1	1	1	1	1	1	1	1	1	1	1	1	1	1
4292736	TGCAGTCGCTCGCCTGCGACCCAACCTGCCAGAGTCCCGCCGAGATCGGAAGAGCGGTTCAGCAGGAAT	1	1	1	1	1	-	1	1	1	1	1	1	1	1	1	1	1	1	1	1	1	1	1	1	1	1	1	1	1	1	1	1	1	1	1	1	1	-	1	1	1	1	1	1	1	1	1	1
4267844	TGCAGCCTCGGCGGCGCAGAAGGAGCCTCCGCGCAGAGCATCTCGGACTGGAGCACGGCGCAGTAGTGG	1	1	1	1	1	1	1	-	-	-	-	-	-	1	1	1	-	1	-	-	1	1	1	1	1	-	1	1	1	1	1	-	-	1	1	-	1	-	1	1	1	1	1	-	1	1	1	1
4281506	TGCAGATCAGATGCTTGTGTCTGTGCATGTTCCGTACGGATGTCATGTCAGGATTGGATTTTGTGCGGC	1	1	1	1	0	1	1	1	1	1	1	-	1	1	1	1	-	1	1	1	1	1	1	1	1	1	1	1	1	1	-	1	1	1	1	-	1	1	1	1	1	1	1	1	1	0	1	1
4269891	TGCAGGTGGCCAATATTCTGAACAACCCTTTCTCGCTCGTCCGGTCGGGCCCGAGATCGGAAGAGCGGT	1	1	1	1	1	1	1	1	1	1	-	0	1	1	1	1	1	1	1	1	1	-	1	1	1	0	1	1	1	1	1	-	1	1	1	1	1	1	1	1	1	1	1	1	-	1	1	-
4297169	TGCAGCGAGGCGCTGTTCAAGTTCGCGGTGTTCGTGCTGGTGCAGGCGCTGGTGTACCTCATCCTGTCC	1	1	1	1	1	1	-	1	1	1	1	1	1	1	-	1	1	1	1	1	1	1	1	1	1	1	1	1	1	1	0	1	1	1	-	1	1	1	1	1	1	1	1	1	1	1	-	1
4291571	TGCAGCAGTGCGTCTCCATGATCCTTCCCCTCCTCCGAGATCGGAAGAGCGGTTCAGCAGGAATGCCGA	1	-	1	1	-	1	1	1	-	1	-	1	1	1	1	1	-	1	-	1	1	-	1	1	1	1	1	-	1	1	1	1	1	1	-	1	1	-	1	-	1	1	-	1	1	1	0	1
4297703	TGCAGTCCAAGGCCGCGGAGCCGTACCTGAGGCTGGTGGGCATGGACCCAGATCGGAAGAGCGGTTCAG	1	-	1	1	1	1	1	1	1	1	1	1	1	1	1	1	-	1	1	1	1	1	1	1	1	1	1	-	-	-	1	1	1	1	1	0	1	-	1	1	1	1	1	1	1	1	1	1
4309571	TGCAGGCTGCTGGTAATCCACAGAGCTAGGTTCCGAGATCGTAAGAGCGGTTCAGCAGGAATGCCGAGA	1	-	1	1	1	1	1	1	1	1	1	1	1	1	1	1	1	-	1	1	1	1	1	0	1	-	1	1	1	-	1	1	1	1	1	1	1	1	1	1	1	1	1	1	1	1	1	1
4279144	TGCAGGGGCGGAGACACCGCTCCGGGATTTCCGCTCCGAGATCGGAAGAGCGGTTCAGCAGGAATGCCG	-	-	1	1	-	-	-	-	1	1	1	1	1	1	1	1	1	1	1	1	1	1	1	1	1	1	1	-	1	1	-	-	1	1	1	1	1	1	1	1	1	1	-	1	-	1	1	1
4263612	TGCAGCTGGTCGCCGAGATTGATGACGAGCGCGTTGGGCCGCGGGTTGACCGCGATCCACCGAGATCGG	1	1	1	1	1	1	1	1	1	1	1	1	1	1	1	1	1	1	1	1	1	1	1	1	1	1	1	1	1	1	1	-	1	1	1	1	1	1	1	1	1	1	1	1	1	-	1	1
4320049	TGCAGTTGCCGAGGTACAGGGACTGGAAGTTGGCCTGGCTCTTTTGGATGACGACACGTACGCTGAGGT	1	1	1	1	-	1	1	-	1	1	1	1	-	1	1	1	1	1	1	1	1	1	1	-	1	1	1	1	1	1	-	1	1	1	1	0	1	1	1	1	1	1	1	-	1	1	1	1
4285864	TGCAGCCCGCGCAGCCCCCTGAGCCCATTTTGTATATCGCCGAGATCGGAAGAGCGGTTCAGCAGGAAT	1	-	1	-	1	1	-	1	1	1	1	1	1	1	1	1	1	1	1	1	1	1	1	1	1	1	1	1	1	1	1	1	-	1	1	1	1	1	1	1	1	1	1	1	1	1	1	-
4293976	TGCAGCTACGGAGCGATGTTTTATCCGCCGATGCCGACGTTGCCGAGATCGGAAGAGCGGTTCAGCAGG	1	-	1	1	1	1	1	1	1	1	1	1	1	1	1	1	-	1	-	1	1	1	1	1	1	-	1	1	1	1	1	1	1	1	-	1	1	1	1	1	1	1	1	1	1	0	-	-
4284014	TGCAGATATATTTGCATGCATGCATGCACACCACCCTGCCTTGCCGAGATCGGAAGAGCGGTTCAGCAG	1	-	1	1	-	1	1	1	1	1	1	-	1	1	1	1	0	1	1	-	1	1	1	-	1	1	1	1	1	1	1	1	1	1	1	1	1	1	1	-	1	1	1	1	1	1	1	1
4296792	TGCAGGAACCTGGAGACGTCCGCGTACGTGATCGCGGTCGTGGCCGAGATCGGAAGAGCGGTTCAGCAG	1	1	1	1	1	1	1	1	-	-	-	1	1	1	1	1	1	1	1	1	1	1	1	-	1	1	1	1	1	1	0	1	1	-	1	0	1	1	1	1	1	1	1	1	1	-	1	1
4325960	TGCAGTCAGGGCAGTGCTCCTTGGGAGCCACATGCCCTACCGAGATCGGAAGAGCGGTTCAGCAGGAAT	1	-	1	1	1	1	1	1	1	1	1	1	1	1	1	1	-	1	-	-	1	1	-	1	1	1	-	1	1	1	1	1	1	1	1	1	1	1	-	-	1	1	1	1	1	1	1	1
4326446	TGCAGCTTCCTGCCGCAGAACACCTCCACCTCCGCCGCGTACGTCGCCGTCACCGAGATCGGAAGAGCG	1	1	1	1	1	1	1	1	1	1	1	1	1	-	1	1	1	1	1	1	1	1	1	1	1	1	-	0	1	1	-	-	1	1	-	1	1	1	1	1	1	-	-	1	1	0	1	1
4294561	TGCAGTCACCTGACATCAGGGCACAAGGACGGCGACGAGCACCGCCGAGATCGGAAGAGCGGTTCAGCA	1	1	1	1	1	1	1	-	1	1	1	-	1	1	1	1	-	1	1	1	1	1	-	1	1	1	-	1	1	1	-	1	1	1	1	1	1	1	1	-	1	1	1	1	-	0	1	1
4311260	TGCAGCAGCTTCAGCGTTGCCGACTGGCTCTCGCTGCGCATGCCCAAGGCGAGCGGCACGATTGTCAGC	1	1	1	1	-	1	1	1	1	1	1	1	1	1	1	1	1	1	1	1	1	-	1	1	1	1	1	1	1	1	-	1	1	1	1	-	1	1	1	1	1	1	1	1	1	-	0	-
4267000	TGCAGGGAGGGGCGAGGGAGAAGGTCCAGTTGGCCACGAAATTCGGCATCACGCCGAGATCGGAAGAGC	1	1	1	1	1	1	1	1	1	1	-	1	1	1	1	-	1	1	1	1	1	1	1	1	1	1	1	1	1	1	1	-	1	1	1	1	1	-	1	1	1	1	1	1	1	1	1	1
4276846	TGCAGTGCACCGTTGCTCTGCCTCCGTGGACTTCATGGAGGAAACGATGAGGCCGTACCCGAGATCGGA	1	1	1	1	1	1	1	-	1	1	1	1	1	1	1	1	1	-	1	1	1	-	1	1	1	1	1	1	1	1	-	1	-	1	1	1	1	-	1	1	1	1	1	1	1	1	-	0
4273455	TGCAGGCCTCCCAGACGTGGACTCTGCTCAAGGTGCAGCAGCTGCTGGGCCGCCCCCCGAGATCGGAAG	-	1	1	1	1	1	1	1	1	0	0	1	1	1	1	1	1	1	1	1	1	1	1	1	1	1	1	-	1	-	1	1	1	1	-	1	1	-	1	1	1	1	1	1	1	1	1	1
4327892	TGCAGGTACGCGTACGCCGCGTGCTTCACGAGCGGGTGGCGTATCATGTGCACGTCCCCGCCGCCTCCT	1	-	1	1	1	1	1	1	1	1	1	1	1	1	1	1	1	1	1	1	1	1	1	1	1	1	1	-	-	1	1	1	1	1	1	1	1	1	1	1	1	1	1	1	1	-	1	1
4270809	TGCAGGTAGAATCCATGGATCGTATCGAGGAGCACTCGCCTCAGTGACCACGAATGCCGAGATCGGAAG	-	1	1	1	1	1	1	1	-	1	0	1	-	1	1	1	1	1	1	1	1	-	1	1	1	1	1	1	1	1	1	1	1	1	1	-	1	1	1	1	1	1	1	1	1	1	1	1
4326403	TGCAGCTCCTAAGCCTCCCAACGTCCTCCGTGTGCCTCTGTGGTGAGCTCCTCGACTGATTCCCCTCGT	1	1	1	1	1	1	1	1	1	1	1	1	1	1	1	1	1	1	1	1	1	1	1	-	1	1	1	1	1	1	1	1	1	1	1	1	1	1	1	1	1	1	1	1	1	1	1	1
4293579	TGCAGCTTCCGCCCGCAGAACACCTCCACCTCCGCCGCGTACGTCGCCGTCACCGAGATCGGAAGAGCG	1	1	1	1	1	1	-	1	1	1	1	1	1	1	1	1	1	1	1	1	1	1	1	0	1	1	1	1	1	-	-	1	1	1	1	1	1	1	1	1	1	1	-	-	1	1	1	-
4298179	TGCAGGTCACCAGCATGGACCGCTACGTCAGGTACCACGTGAGGGAGTTCGAGAGGGCCTTCGCCCTCA	1	-	1	1	1	1	1	1	1	1	-	-	1	1	1	1	-	1	-	1	1	1	1	1	1	1	-	1	1	1	-	1	1	1	-	-	1	1	1	1	1	1	1	1	1	1	0	1
4282990	TGCAGTTGAGTTATGGTGGCTTCTGTGATGCTGTCCTGCCTTCCCGAGATCGGAAGAGCGGTTCAGCAG	1	-	1	1	1	1	1	1	1	1	1	-	1	1	1	1	1	1	1	1	1	1	1	-	1	1	1	1	1	1	1	1	-	1	1	1	1	1	-	1	1	1	1	1	1	0	1	-
4270253	TGCAGCTGCCTCCCCCGCCGGCGGACATGCACCCGATCCCCGAGACGCCGAGATCGGAAGAGCGGTTCA	-	1	1	-	0	1	1	1	-	1	1	1	1	1	1	1	1	1	1	-	1	1	1	1	1	1	1	1	1	1	1	1	1	1	1	1	1	1	1	1	1	1	1	1	1	1	1	1
4326865	TGCAGGGCCGCGCGCTCACCAACGCCGTTGGCAACCTCGCCATCACCGAGATCGGAAGAGCGGTTCAGC	1	-	1	1	-	-	1	1	1	1	1	1	1	1	1	1	1	1	-	1	1	1	1	-	1	1	1	1	1	1	-	-	1	1	1	1	1	1	1	1	1	1	-	1	1	0	1	-
4302900	TGCAGTGCAGCGATACGAGGGGACAAGGCGCTAGAATACCGAGATCGGAAGAGCGGTTCAGCAGGAATG	1	1	1	1	1	-	-	1	1	1	1	1	0	1	1	1	1	-	1	1	1	1	1	1	1	1	1	1	1	1	1	1	1	1	-	-	1	1	1	1	1	1	-	-	1	-	1	1
4294305	TGCAGGGCGCCTAGCCGCAGTGCCTCCACCACGCGGGCCGCAGCGTAGGAGTACGCCCCGAGATCGGAA	1	-	1	1	1	1	1	1	1	1	1	1	1	1	1	1	1	1	-	1	1	1	1	-	1	1	1	-	1	1	1	1	1	1	-	1	1	-	1	1	1	1	1	1	1	1	1	-
4289285	TGCAGCTCCGTTCGCTTCGGCACCACTCCCTTGCTTCTTATCGAGGTCGGTGCCAACAAACAAGTCCCA	1	1	1	1	1	1	1	1	1	1	1	1	1	1	1	1	1	1	1	1	1	1	1	1	1	1	1	1	1	1	1	1	1	1	1	1	1	1	1	1	1	1	1	1	1	1	1	1
4325504	TGCAGTTCGACGAGGCAGAGAAACTGTGCCGCAAAGCCCTTGAGATCCACCGAGATCGGAAGAGCGGTT	1	1	1	1	1	1	1	1	1	1	1	1	1	1	1	1	1	1	1	-	1	1	1	-	1	1	1	1	1	1	1	1	1	-	1	-	1	1	1	1	1	1	1	1	1	1	1	1
4290376	TGCAGGGCCCGCTCACTAGGCTGCTCAGCGGCATCTTCCAGCTCGGCCCCGCCGAGATCGGAAGAGCGG	1	1	1	1	1	1	1	1	1	1	1	1	1	1	1	1	1	1	1	1	1	1	1	1	-	1	1	1	1	1	-	1	1	1	1	1	1	1	1	-	1	1	-	1	-	1	1	1
4276212	TGCAGCCGATTCCCGCCGCGCTGAGCAGCCAGTTAGCTAGCGCCCGCCCATGCCGAGATCGGAAGAGCG	1	1	1	-	-	1	-	1	1	1	1	1	1	1	1	-	1	1	-	1	1	1	1	1	1	1	-	1	1	1	-	1	1	-	1	-	1	0	1	1	-	-	1	1	-	1	1	1
4292341	TGCAGCCACACTCTTTGAGCTTGGGGCTCAGGTGCATGCCCGAGATCGGAAGAGCGGTTCAGCAGGAAT	1	1	1	1	1	1	1	1	1	1	1	1	1	1	1	1	1	1	1	1	-	1	1	1	1	-	1	1	1	1	1	1	1	1	1	1	1	1	1	1	-	-	1	1	1	1	1	1
4283869	TGCAGCCGAGGAGCGCCACCCAGGAATCGCAACGCCATTGAGGAGCGCCGAGATCGGAAGAGCGGTTCA	1	1	1	-	1	1	1	-	1	1	1	1	1	1	1	1	1	1	1	1	1	1	1	-	1	1	1	1	1	1	0	1	1	1	1	-	1	-	1	1	1	1	1	1	1	1	1	1
4288325	TGCAGTGTGCAACACCCTTGGTTCCTCAATCAAAGGTATATTCATGGAGTTGGAAAATCTCATCCGCCG	1	1	1	1	1	1	1	1	1	1	1	1	1	1	1	1	1	1	1	-	1	1	-	-	-	1	1	1	1	1	1	1	1	1	1	1	1	1	1	1	1	1	1	1	1	-	1	-
4287115	TGCAGAGCGCACTGGTTGCTGAGTTCAATTAGCCCCCGAGATCGGAAGAGCGGTTCAGCAGGAATGCCG	-	1	1	1	1	1	-	1	1	1	1	-	1	1	1	1	1	1	1	1	-	1	1	1	-	-	1	1	1	1	1	1	1	1	1	1	1	1	-	1	-	1	1	1	1	1	1	-
4279905	TGCAGGAAGAGGTAAGGAGGAATGTAACCAACGGGCAAGAGATGGTCGCCGAAGACGATCTCCCCAACA	1	1	1	1	-	1	1	1	1	1	1	-	1	1	1	1	1	1	1	1	1	1	1	-	1	1	1	1	1	1	1	1	1	1	-	1	1	1	1	1	1	1	1	1	1	-	1	1
4282812	TGCAGGTGAAGTTGTTTGACTTGATTGGATTCTCGCACGGGGCTCTCGAGAATCAAGTCGTGCCGAGAT	1	-	1	1	1	1	1	-	1	1	1	-	1	1	1	1	-	1	1	1	1	1	1	1	1	1	1	1	1	1	1	1	1	1	1	1	1	1	1	1	1	1	1	1	1	1	1	1
4299978	TGCAGGCCTTGTCCGCGGCCGCCTCGATCGCCGTCATGGCGTCCACCGAGATCGGAAGAGCGGTTCAGC	-	1	1	-	1	1	1	1	-	1	1	1	1	-	1	1	1	1	1	-	1	1	1	1	1	1	1	1	1	1	1	1	-	1	1	-	-	1	1	1	1	-	-	-	1	0	1	1
4285672	TGCAGCCGAGAGGTTAATTTGCTGCGCTGCATGTGCCGAGATCGGAAGAGCGGTTCAGCAGGAATGCCG	1	1	1	1	1	1	1	1	1	1	1	1	-	1	1	1	-	1	1	1	1	1	1	1	1	1	1	1	-	1	0	1	-	1	1	1	1	1	1	1	1	1	1	1	1	1	-	1
4266297	TGCAGGAGAAGCACGCCGCCGCCATTGATAACATCCTGAGGGACCTGCACTGGTCCAGCCGAGATCGGA	1	1	1	1	1	1	1	1	1	1	1	1	1	1	1	1	-	1	0	1	1	1	1	0	1	1	1	1	1	1	1	1	1	1	1	1	1	1	1	1	1	1	1	1	1	1	1	-
4289785	TGCAGTGAATCGAATTCGCCGGCGCAGGTGTTACACGTCCACCGAGATCGGAAGAGCGGTTCAGCAGGA	1	1	1	-	0	1	-	1	-	-	1	1	1	-	1	1	1	1	1	1	1	1	1	1	1	1	1	1	1	1	1	1	-	1	1	1	1	1	1	1	-	1	1	1	1	1	1	1
4298442	TGCAGGCTGCCTGAAAACTCACCTAAACCGAGATGGACCAAAGCGTGTAGCGCGGCGGCCAGGGACCGC	-	1	1	1	1	1	1	1	1	1	1	1	1	1	1	-	-	1	1	1	1	1	1	1	1	1	1	1	1	1	1	1	1	1	1	1	1	1	1	1	1	-	1	1	1	1	1	0
4284691	TGCAGACGGACAAGATCTGGACGGGCCGCCTCCGCGTGGTGTCGTGCGGCGACCGCTGCGAGATCCGGC	1	-	-	-	1	1	1	1	-	1	1	1	1	1	-	1	1	1	1	1	1	1	1	1	-	1	1	1	1	1	1	1	1	1	1	1	1	1	1	1	1	1	1	1	1	0	-	1
4281934	TGCAGCTGGTCCATGGGCGGATGGTGGACCATCTCTTCCGAGATCGGAAGAGCGGTTCAGCAGGAATGC	1	1	1	1	1	1	-	1	1	1	1	1	1	1	1	1	1	1	1	1	1	1	1	1	1	1	1	1	-	-	1	1	1	1	1	-	-	-	-	1	1	1	1	1	0	-	1	1
4296525	TGCAGCTGTAACGCGGGACGCATGTACAAAATTAGGATGGTACAAGTGTGTAGTACACGCCGCGTACAA	1	1	0	1	1	1	1	1	1	1	1	-	1	1	1	1	1	1	-	1	1	1	1	-	1	1	1	1	1	1	1	1	1	1	1	1	1	1	1	1	1	1	1	1	1	1	-	-
4264812	TGCAGGAAGCTGAAGCACCAGATGGCTCCTCCCTCGTCTACACATACACTTTAGGCTCCAGCCAGCCGC	1	1	1	1	-	1	1	1	1	1	1	1	1	1	1	1	1	1	1	-	1	1	1	1	1	1	1	1	-	1	1	1	1	1	1	1	1	0	1	-	1	-	1	1	1	0	1	1
4291162	TGCAGGTGCTCTCGCGCGACAGGCCGGAGGACCCTGCTCTGCTCATGTACTTCCTCGACTCCGAGATCG	1	1	1	1	1	1	-	1	1	1	1	1	-	1	1	1	1	1	1	-	1	-	1	1	1	0	1	1	1	0	1	1	1	1	1	1	1	1	1	1	1	1	-	-	1	1	1	1
4278691	TGCAGCACCACCACGCCGAGCGCGTACACGTCTGACTTGGCCGACACGGCGCCCGTCCGCTGGTACTCC	1	1	1	-	1	1	1	1	1	1	1	1	1	1	1	1	1	1	1	1	1	1	1	0	1	1	1	1	1	1	1	1	1	-	1	1	1	-	1	-	1	1	1	1	1	1	1	1
4272343	TGCAGTGGGTCGCGATGCAAAACTTGCCTGAGCCCAGGTTCACCAAGGCACGCCCCACCGAGATCGGAA	-	1	1	1	1	1	1	-	1	1	1	-	0	1	1	1	1	1	1	1	1	1	1	1	-	1	1	0	1	1	1	1	-	1	1	1	1	1	1	1	1	1	-	-	1	1	1	-
4304119	TGCAGGCAGGCACAACATGCATGGGCGCCAAGCACGGCCGAGATCGGAAGAGCGGTTCAGCAGGAATGC	-	1	1	1	1	1	1	1	1	1	1	1	1	1	1	1	-	1	1	1	1	1	1	1	-	1	1	1	1	1	-	1	1	1	1	1	1	-	1	1	1	1	1	1	-	1	1	-
4288281	TGCAGAGGCGAGCGGGTGGTTGTGCTGGGCTACAAACTCAGTGACACGGAAGGCATTGGCCGAAGGGAG	1	1	1	1	1	1	1	1	1	1	1	1	1	1	1	1	-	1	1	1	1	1	1	1	1	0	1	1	1	1	1	1	1	1	1	1	1	-	1	1	1	1	1	1	1	1	1	1
4269544	TGCAGCACAGAGCGGTGGCTCAGAGAGCGCCGAGACGTCGCGCCGAGATCGGAAGAGCGGTTCAGCAGG	1	1	1	1	1	1	1	1	0	0	-	1	1	1	1	1	1	1	1	1	1	1	1	1	1	-	1	1	-	1	1	1	1	1	1	1	1	1	1	1	1	1	1	1	1	1	1	1
4327221	TGCAGCGTCTTGGCGAGCGCCGCTCCGCTTTCCTCCCCGAGATCGGAAGAGCGGTTCAGCAGGAATGCC	1	1	1	1	1	1	1	1	1	1	1	1	1	1	1	1	1	1	-	1	1	1	1	1	1	1	1	1	1	1	1	-	-	1	1	1	1	1	1	-	-	1	1	1	1	1	-	1
4265858	TGCAGTCATCAGCCACACTACTTTGCCACGTCGGACTTCTTGGTCGTAGCAGACTAGCCGCCGCCCTCC	1	1	1	1	1	1	1	1	1	1	1	1	1	1	1	1	1	1	1	1	1	1	1	1	1	1	1	-	1	1	0	1	1	1	1	1	1	-	1	-	-	-	1	1	1	0	-	1
4266863	TGCAGGGAGAGCTGGCACGCCGGGACGTCGGCCTCCCAGATCGGAAGAGCGGTTCAGCAGGAATGCCGA	1	1	1	1	1	1	-	0	-	1	-	1	1	-	1	1	1	1	1	-	1	-	1	1	-	1	1	1	1	-	1	-	1	1	1	1	1	1	1	1	1	1	1	-	1	1	1	-
4265326	TGCAGGGTCTCGAGATGCATCTTCCTCCTCATGCTGGCGATGAACTCTTCGAATTTCTTGTTCATCTCG	1	-	1	1	-	1	1	1	1	1	-	1	-	1	1	1	1	1	1	1	1	1	1	-	1	1	1	1	1	1	-	1	1	1	-	-	1	1	1	1	1	1	1	1	-	0	-	1
4273315	TGCAGGTAAGTGTAGGTAACTTCAGTGTACTGTAGCAAATAACATTTTGTCAGGAGATCACGCTCAAGA	1	1	1	1	1	1	1	1	1	1	1	-	1	1	1	1	1	1	0	1	1	1	1	1	1	1	1	-	1	1	1	1	1	1	1	0	1	-	1	1	1	1	1	1	1	1	1	1
4312804	TGCAGCTCCCGGCGGCGAAGGCAGCCATGAGGCCGAGCAGCTCCACCAGGACGCACACCGAGATCGGAA	1	0	1	1	-	1	1	-	1	1	1	1	1	1	1	1	1	1	1	0	1	1	1	1	1	1	1	1	1	1	1	1	1	1	1	1	1	1	1	1	1	1	1	1	1	1	1	1
4265577	TGCAGCACGGCGCGGACGGAGGAGGCCGACGCCGCGCCGAGATCGGAAGAGCGGTTCAGCAGGAATGCC	1	-	1	-	1	1	-	1	1	1	1	1	1	1	1	0	1	1	1	1	1	1	-	1	1	1	1	1	1	1	1	1	1	1	1	1	1	1	1	1	-	1	1	1	1	1	1	1
4278974	TGCAGCTGCATTTACCTCTACCCTCGGAACTCAAACGTGCACAGAGGCCACCGAGATCGGAAGAGCGGT	1	1	1	1	-	1	1	1	1	-	1	1	1	1	1	-	-	1	1	1	1	1	1	1	1	1	1	-	-	1	0	1	1	1	1	1	1	-	1	1	1	-	1	1	1	1	1	1
4273042	TGCAGCTAAGCTGGAGTATTTCCCTGACATAGCTGTTGCTCCTTCTTCCTTGCATCATCCGAGATCGGA	1	1	1	1	-	1	1	1	1	1	1	1	1	1	1	1	1	1	1	-	1	1	1	-	1	1	1	1	1	1	1	1	1	1	1	0	1	-	-	1	1	1	1	1	1	-	1	-
4294146	TGCAGATGCTTGTACGGCTCTTTGATTTTCAGCGGAGGCAAGAAAGAAATCCGAGATCGGAAGAGCGGT	1	-	1	1	1	1	1	1	1	1	1	1	1	1	-	1	-	1	-	1	1	-	1	1	1	1	1	1	1	1	1	1	1	0	1	1	0	1	1	1	1	1	1	1	1	1	1	1
4281836	TGCAGGGGCTAGCCATGCTCACCCTGTCAACGGTGCTCGCACCGAGATCGGAAGAGCGGTTCAGCAGGA	1	-	1	1	1	1	1	1	1	1	1	1	1	1	1	-	1	-	1	1	1	-	1	1	1	1	1	1	1	1	1	1	1	1	1	1	-	1	0	1	1	-	-	1	1	1	1	1
4266824	TGCAGGTGTAAAGCTCACTGCTTGCCAGGCCCACCCGAGATCGGAAGAGCGGTTCAGCAGGAATGCCGA	-	1	1	1	1	1	1	1	1	1	1	1	1	1	1	-	-	1	-	0	1	1	1	1	1	1	-	-	1	1	0	1	1	1	1	1	1	1	-	1	1	-	1	1	1	1	1	1
4298369	TGCAGTCTCGTGCCCAGCAAAGTAGATGTTCTTGCAGTTGTCGACGATGTAGTCCTCGGCGCTGCCACC	1	1	1	1	1	1	1	1	1	1	1	-	-	1	1	1	1	1	1	1	1	1	1	1	1	1	1	-	1	1	1	1	1	1	-	1	1	1	1	1	1	1	1	0	1	-	1	-
4267944	TGCAGGGGTTCATTATGGGGAGGGCGACGGCGGCGAGGAGCTAGCGGCGTTCCGACCCAGAGCATCTTC	1	-	1	1	-	1	1	1	1	1	1	-	1	1	1	1	1	-	0	1	1	1	1	0	1	1	1	1	1	1	1	1	1	1	1	-	1	1	1	1	1	1	1	1	1	-	1	1
4276312	TGCAGGGATCCATCCATCCCGTTATTATTGTAAGCGTAAGCGGCCGAGATCGGAAGAGCGGTTCAGCAG	-	-	1	1	1	1	1	1	1	1	-	-	1	1	1	1	1	1	1	1	1	1	1	1	1	1	1	1	-	1	1	1	-	1	1	1	1	-	1	1	1	1	1	1	1	1	1	1
4296101	TGCAGTCGGAGTGTCTGTGTCACACGACGTGTTCGCCGAGATCGGAAGAGCGGTTCAGCAGGAATGCCG	1	1	1	1	1	1	1	1	1	1	1	1	1	1	1	1	-	1	1	-	1	1	1	1	1	1	1	-	-	1	1	1	1	1	1	1	1	1	1	1	1	1	1	1	1	1	1	1
4288618	TGCAGGAGAGCCGGAAGCGCCAACGCCGCCACACACCGAGATCGGAAGAGCGGTTCAGCAGGAATGCCG	1	1	1	1	1	1	1	1	1	1	1	1	1	1	1	1	1	1	1	1	1	1	1	1	1	1	1	1	1	-	1	1	-	1	1	1	1	1	1	1	1	1	1	1	1	1	1	1
4279285	TGCAGGTGAACGGGGAGTAGGTGCTCGACGATCTGGGGTCGAAGAGCGGGTCCGCCTGCGAGTGGCACC	1	-	1	1	1	1	1	1	1	1	1	1	1	1	1	1	1	1	1	1	1	1	1	-	1	1	1	1	1	1	1	0	1	1	-	1	1	1	1	1	-	1	1	1	1	-	1	1
4290842	TGCAGGAGGCGGAGGCCGACCCCGCCAAGCGTCCCCGCCGACCCCTGTGGGCTATTCATCCACAGTCCG	1	1	1	1	1	1	1	1	-	-	1	1	1	1	1	1	1	1	1	1	1	1	1	1	1	1	1	-	1	1	1	1	1	1	-	1	1	1	1	1	1	1	1	1	1	1	1	1
4294191	TGCAGCCTCTTCTCCCCGACGCCCTCCCTCTCCGCCATGATCATCAACAAGTACAAGCTCCGCAGCAAC	1	1	1	1	-	1	1	1	1	1	1	1	-	1	1	1	1	1	1	1	1	1	1	1	1	1	1	1	1	1	-	1	1	1	-	-	1	-	1	1	1	1	-	1	1	1	1	1
4284485	TGCAGCCCCACCGCGCCCTCTCAGACAAGGTGGAGCTGATCGAGATCGACCTCTCCGAGGAATCCGCCT	1	1	-	1	1	1	0	1	1	1	1	1	1	1	-	-	1	1	1	-	1	1	-	1	1	1	1	1	1	1	1	1	1	1	1	1	-	1	1	-	1	1	1	1	1	-	1	1
4323515	TGCAGGTTCATGGAGACGTAAGGACTCCAGAATGTCGACAGATGAGAACGTGAACCGAGATCGGAAGAG	-	1	1	1	1	1	1	1	1	1	1	-	1	1	1	1	1	1	1	1	1	-	1	1	1	1	1	1	1	1	1	1	1	1	1	0	1	1	1	-	1	1	1	1	1	1	1	1
4294615	TGCAGTAGCAAGTCGCGCCACCTGCACCTGTTATCACCACAAGACGTTCTACTACACCTATATGTTCTA	1	-	1	1	1	1	1	-	1	1	1	-	1	1	1	1	1	1	0	1	1	1	1	1	1	1	1	1	-	-	1	-	1	1	1	1	1	1	1	-	1	1	1	1	1	0	1	1
4299588	TGCAGAGGCGAGCTAATAATAACCACAGTATGCACTGGTAGACTGCTGCGTGCAGCCATCGGCATTACC	-	1	1	1	1	1	1	1	1	1	1	1	1	1	1	1	1	1	1	1	1	1	1	1	-	1	1	1	1	1	1	1	1	1	1	-	1	1	-	1	1	1	1	1	-	1	1	1
4266831	TGCAGGTACACGGCCACCGGCATCTTGGGCGGCAGCACCGAGATCGGAAGAGCGGTTCAGCAGGAATGC	1	-	1	1	-	1	1	1	1	1	1	1	1	1	1	1	1	1	1	1	1	-	1	1	1	1	1	1	-	1	-	1	1	1	1	1	1	1	-	1	1	-	1	1	-	1	0	1
4268791	TGCAGGGCAGGGCCAACGACGCGACGGAGGGCGTGGTGGACGTCGTTCCCGAGATCGGAAGAGCGGTTC	1	-	1	1	1	1	1	1	1	1	1	1	1	-	1	1	1	1	-	1	1	1	1	1	1	1	1	1	1	1	1	1	1	1	1	1	1	1	1	1	-	-	-	1	1	1	-	1
4302516	TGCAGGTGGTCCGGCCACGGAGACCTTGGATGCTAGCGTTGGAGTTGTCCACGCGCGTACGTGTACCGA	1	-	1	1	1	1	1	-	1	-	1	1	1	1	1	1	1	-	1	1	1	1	1	-	1	1	1	1	1	1	1	1	1	1	1	1	1	1	1	1	1	1	1	1	1	1	0	1
4270408	TGCAGATCACCGGAGGACGAGAGGCGGAGCGAGCCCCTCGAATCCACGGCCGCGCCGAGATCGGAAGAG	1	1	1	1	1	1	1	1	1	1	1	1	1	1	1	1	1	1	1	1	1	1	1	1	1	1	1	1	1	-	1	1	-	1	0	1	1	1	1	1	1	1	1	-	1	1	1	-
4301619	TGCAGGGGAGAATTCAGCAGCATTGCAGGTACCAAGAAGAACCCAGAGGGTCCCAAGAAGGAGCAGAGC	1	-	1	1	-	1	-	1	1	1	1	-	1	1	1	1	1	1	1	1	1	1	-	-	1	1	1	1	1	1	1	-	1	1	1	1	1	1	1	1	1	1	1	1	1	1	1	-
4284611	TGCAGGAGGTGCTGATGGGCAAGGACTCGTTCTTCAAGTCGTTCCAGGTGAACGCCGACAACTTCATCT	1	-	1	1	1	1	1	1	1	1	1	-	-	1	1	1	1	1	1	1	1	1	1	-	1	1	1	1	1	1	-	1	1	1	1	0	1	1	1	1	1	1	1	1	1	1	1	1
4278672	TGCAGTCTCGAGCCCAGGCACGGCCCAACTGCTATTCGGGCCGAGATCGGAAGAGCGGTTCAGCAGGAA	1	-	1	1	1	1	-	1	1	1	1	-	1	1	1	1	-	1	1	1	1	1	1	1	1	-	1	1	1	1	0	1	1	1	1	1	1	1	1	1	1	1	1	1	1	-	1	1
4328926	TGCAGCTTAGATGGATCTGTATATTGCAGCTTTTGCACATACTTCATTTAATTCTCCGAGATCGGAAGA	1	-	1	1	1	1	1	1	1	1	1	-	1	1	1	1	1	1	1	1	1	1	1	1	1	1	1	1	1	1	1	1	1	1	1	0	1	-	1	1	1	1	1	1	1	1	-	1
4285463	TGCAGAAGAAGTCGATGAGGAGGGCGGCCGGGCGGGCGGAGCGGAGGAAGTCGCGCAGGTCCGAGATCG	1	1	-	1	1	1	1	1	-	1	1	1	1	1	1	1	1	1	1	1	1	1	1	1	1	1	1	1	1	1	1	1	1	1	1	-	1	1	1	1	1	1	1	1	1	1	1	1
4327971	TGCAGGACTCCGATCGATATCAACGTCCATACGGAGGAGACGACGAGTGGATGGACTCTAGTAACGACC	1	1	1	1	-	1	1	1	1	1	1	-	1	1	1	1	1	1	1	1	1	1	1	-	1	1	1	1	1	1	-	-	1	-	1	1	1	1	1	1	1	1	1	1	1	1	0	-
4289085	TGCAGCTGACTCCGACGAGCTGCGAGGCCGTCAAGTCGCGCCGAGATCGGAAGAGCGGTTCAGCAGGAA	1	1	1	1	1	1	1	1	1	1	1	1	1	1	1	1	1	1	1	1	1	-	1	1	1	1	1	1	1	-	1	1	0	-	1	1	1	1	-	1	1	1	1	-	1	-	1	1
4302193	TGCAGCAGCACCTGGCCGACCCATGGCACACCACCATCATCCAGACCATCTCCGGCCAGTAAATCCGTC	-	1	1	1	1	-	1	1	1	1	1	1	1	1	1	1	1	1	1	1	1	1	1	1	1	1	1	1	1	1	1	-	1	1	1	1	1	1	1	1	1	1	-	1	1	0	1	1
4293394	TGCAGATCATGAGCGACCAGTCGTTCACGGTGCTGGTGTTCATGTCGGCGCTGATCACAGCGCTGGTGA	1	1	1	1	-	1	1	1	1	1	1	-	1	1	1	1	1	1	0	1	1	-	1	-	1	1	1	0	1	1	1	1	-	1	1	1	1	1	1	1	1	1	1	1	-	-	1	1
4272943	TGCAGTGCGACAGCAGGTGCACGTACGCGCTCGTGGTGTCCACGGAGATTCTCACCTCGGATTACTACT	-	-	1	1	1	1	1	1	1	1	1	1	1	1	1	1	1	1	-	-	1	1	1	1	1	1	1	1	1	-	1	1	1	1	1	1	1	1	1	1	1	1	1	1	1	-	1	1
4273146	TGCAGTGCTCTACAACATAAACCAGCTTCACGACACAAACTATACAATCCCCGAGATCGGAAGAGCGGT	1	1	1	1	-	1	1	1	1	1	1	1	1	1	1	1	1	1	1	1	1	1	1	1	1	1	1	1	1	1	1	1	1	-	-	0	1	1	1	1	1	1	1	1	1	1	1	1
4281512	TGCAGGCAGATAATAAGATCGTTGTTAGTAGCTGCTACTCTTGGAAAGGGGAAGGGGCAACGAGAGCCT	1	1	-	1	1	1	1	-	1	1	1	-	1	1	1	1	1	1	1	1	1	1	1	1	1	1	1	-	1	1	1	1	1	1	1	1	1	1	1	1	1	1	1	-	1	1	0	-
4272570	TGCAGAAACGAGAACACCAAAAAGACCTACCAGGTTGTGGTAGTTGGCGAGCTTGGCCATGGTGGTGCT	1	-	1	1	-	1	1	1	1	1	1	1	-	1	1	1	1	1	-	1	1	-	1	1	-	1	1	-	1	1	1	1	1	1	1	1	1	1	1	1	1	1	1	1	1	1	1	1
4288000	TGCAGCCATGCGAGCACGCGAGGCGGCCGGGCGGCGCGCTCCGAGATCGGAAGAGCGGTTCAGCAGGAA	1	-	1	1	1	1	1	1	-	1	1	1	1	1	1	1	1	1	1	-	1	1	1	1	1	1	1	1	1	1	1	1	1	1	1	1	1	1	1	1	1	1	1	1	1	1	1	1
4293260	TGCAGATTTCTGCACCTTTATCCCACTCTGTGATGAACGTTCCTAAAACCTTGGCTCAAAAACCGAGAT	1	1	1	1	-	1	1	1	1	1	1	1	1	1	1	1	1	1	0	-	1	1	1	1	1	1	1	1	1	1	1	1	1	1	1	1	1	1	-	1	1	1	1	1	1	1	1	1
4321560	TGCAGCATCCGGCGCTCGCGGAGCGCCTCGATGTCGTCCGAGATCGGAAGAGCGGTTCAGCAGGAATGC	1	1	1	1	1	1	1	1	1	1	1	-	1	1	1	1	1	1	1	1	-	-	-	1	1	1	0	1	1	1	-	1	-	1	1	1	1	1	1	1	-	1	-	1	1	1	1	1
4279268	TGCAGCGACAACCCGCCACCGTCGCCGCCGCTTCCTCCTACTCCTCCGAGATCGGAAGAGCGGTTCAGC	1	1	1	1	-	1	1	1	1	1	1	1	1	1	1	1	1	1	1	0	1	1	1	1	-	1	1	1	-	1	1	1	1	1	1	1	1	1	1	1	-	1	1	1	1	1	-	1
4288570	TGCAGCCACCGCGTCGCCCGACGACGGTGATGGCTCCGAGATCGGAAGAGCGGTTCAGCAGGAATGCCG	-	-	1	1	1	1	-	1	1	1	1	1	1	1	1	1	1	1	1	1	-	1	1	1	1	1	1	1	1	1	-	1	1	1	1	1	-	1	1	-	1	1	1	1	1	1	1	-
4272671	TGCAGCAGCCCGCCGCTGCACAGGCGCCGCCGCCGCGCGCACCGAGATCGGAAGAGCGGTTCAGCAGGA	1	1	1	1	1	-	-	1	1	1	0	1	1	-	1	1	1	1	1	1	1	1	1	1	1	1	1	1	1	1	1	-	1	1	1	1	1	1	1	1	1	1	1	1	1	1	1	1
4290069	TGCAGGGAGCTAATTCGAGCTCGTCGACTCGCAAAGACGAAGATGCCCCAGAAGGGAGCTGGACCTGTC	1	1	1	1	-	1	1	-	1	1	1	1	1	1	1	1	1	1	-	1	1	1	1	1	1	1	1	1	1	1	1	1	1	1	1	1	1	1	1	1	1	1	1	1	1	1	0	1
4282914	TGCAGCACCTCGAGGTCCGGCAGCTCGGCGACGAACGCCGAGATCGGAAGAGCGGTTCAGCAGGAATGC	1	1	1	-	1	1	1	1	-	-	1	1	1	1	1	1	1	1	1	1	-	1	1	1	1	1	-	1	1	1	1	-	1	1	1	1	1	1	1	1	1	1	-	1	1	1	0	1
4268649	TGCAGGTTGGTCAGGCTCCGGCCGAGCTCCGTCGGGATGAGGCCGAGATCGGAAGAGCGGTTCAGCAGG	1	1	1	1	1	1	1	1	-	1	1	1	1	1	1	1	1	1	1	1	1	1	1	1	1	1	1	1	1	1	1	1	1	1	-	1	1	-	1	1	1	1	1	1	1	1	0	1
4263543	TGCAGAACCGGCTGCGGCGTTACCCCAGAGATTGCAACCGAGATCGGAAGAGCGGTTCAGCAGGAATGC	1	1	1	1	1	1	1	1	-	-	1	1	1	1	1	1	1	-	1	1	1	1	-	1	1	1	1	-	1	1	1	1	1	1	1	1	1	1	1	1	1	-	-	1	1	1	1	1
4327847	TGCAGGAGCACACCGCCGTCTTCTTCAGGGTGTTCAGGCACCATGACAAGTACAGAGTCCTCATGTGCA	1	-	1	1	-	1	1	1	1	1	-	1	1	1	1	1	1	1	0	1	1	1	1	-	1	1	1	1	1	1	1	1	1	1	1	1	1	1	1	-	1	1	1	1	1	1	1	1
4294052	TGCAGGAGCCCAGTCGATGGCGTCATCGGAGACCGGCCGCACGCCGAGATCGGAAGAGCGGTTCAGCAG	-	1	1	1	1	1	-	1	1	1	1	-	1	1	1	1	1	1	1	1	1	1	1	1	-	1	1	1	1	-	1	1	-	1	1	1	1	1	1	1	1	1	1	-	1	0	1	-
4302386	TGCAGCCGAGCTCCCAGACGTACTGCCGGTGCCGGGCGCGCACCTCCTCTGCCATGGCCCAGTACAGCC	1	1	-	1	1	1	1	1	1	1	1	1	1	-	-	1	1	1	1	1	1	1	1	1	1	1	1	1	1	1	1	0	1	1	1	1	-	1	1	-	1	1	1	1	1	1	1	-
4302603	TGCAGATGATTGCTGGGCAGAACCCGAACGTGATGCCAAGGTTTGTACAGAATCTGCCCTCCCACCGAG	1	-	1	1	-	1	1	1	1	1	1	1	1	1	1	1	1	1	1	1	1	1	1	-	1	1	1	1	1	1	1	-	1	1	1	-	1	1	1	1	1	1	-	1	1	1	1	1
4271661	TGCAGAACACGGCCATCCTGGGGTCCGAGAACCATCCGCTGCACCTGCACGGCTTCAACTTCTACGTGC	1	1	1	1	1	1	1	1	-	1	1	1	1	1	1	1	1	1	-	1	1	1	1	1	1	1	1	-	1	1	1	1	1	1	0	-	1	1	1	1	1	1	1	1	-	-	1	1
4298789	TGCAGGGCATCGCCTCCTTCGTGGCTGACCGGGCAAAGTACTCCGACACGCAGATTCATGAGATTGCCG	1	-	1	1	1	1	1	-	1	1	1	1	1	1	1	1	1	1	1	1	1	1	1	1	1	1	1	1	1	1	1	1	-	1	1	1	1	-	1	1	1	1	1	1	1	0	1	1
4266574	TGCAGCTGCTCGGCCCGACGGCGAGCGCGTGGGTGCAACTCGAGGCCCAGATCGGAAGAGCGGTTCAGC	1	-	1	1	1	-	-	-	1	1	1	1	1	1	1	1	1	1	1	0	1	1	1	-	-	1	1	1	1	1	1	1	1	1	1	1	1	-	1	1	1	1	1	1	1	1	1	1
4278172	TGCAGGAGGACGAAAGTGTACACGAGGCGGCTCCGTGTACTGACGATACCCGCCGTTCTGAACTTCTTC	1	-	1	1	1	1	1	1	1	1	1	1	1	1	1	-	1	1	1	1	1	1	1	1	1	1	1	1	-	1	1	1	1	1	1	0	1	1	1	1	1	1	1	1	1	1	1	1
4325916	TGCAGGAGGCTGCTGGACGACGCCGGGGAGAGCTTGTGGAGCGGGCCGACGTCGAACACGGGCACGCCG	1	1	1	1	1	1	1	1	-	-	1	1	1	1	1	1	1	1	1	-	1	1	1	1	1	0	1	1	1	1	1	1	1	1	1	0	1	1	1	1	1	1	1	1	1	1	1	1
4327650	TGCAGTGTCGTCATCGGCTGTGGTGATGGACCCGTATCCCACGCCCGAGATCGGAAGAGCGGTTCAGCA	1	1	1	1	1	1	1	-	1	1	1	1	1	1	1	1	1	1	1	1	1	1	1	-	1	1	-	1	1	1	1	1	1	1	1	1	1	1	1	1	1	1	1	1	1	1	-	-
4264269	TGCAGGATCGTCTTGAGGAAAGTTACCAGGTTGAACTGGATCCCGTAGTACGCTAGCTCCTCGAAGCAC	1	1	1	1	1	1	1	1	1	1	1	-	1	1	1	1	1	1	1	1	1	1	1	1	-	1	1	1	1	1	1	1	1	1	1	-	1	1	-	1	1	1	1	1	1	-	1	1
4279439	TGCAGGTTTGAAGTCGGCCATAAGAAGTATGCCGCGCTATTTTCTGTGTGCACACACCCAGAAGCAACC	1	1	1	1	-	1	1	-	1	-	-	1	1	1	1	1	-	1	1	-	1	1	-	1	1	-	1	1	1	1	1	1	1	1	1	1	1	-	-	1	1	1	1	1	1	1	1	1
4281069	TGCAGGAGAAGCTGGAGCGCCTGCCTGAGATCGAGCGCGCCTTCGTCCACCTCGACTACGAGTTCACCC	1	1	1	1	1	1	1	1	1	1	1	-	1	1	1	1	1	1	1	1	1	1	1	1	-	1	1	1	1	1	1	1	1	1	1	1	1	1	-	1	1	1	-	1	1	-	1	1
4326284	TGCAGACCTTCTGCACCGTCTACGACTGCAAGCGCTGGTTCGGCGGCATACTGGAACTGCCGCAGATAA	-	1	1	1	1	1	1	0	1	1	1	1	1	1	1	-	1	1	1	1	1	1	1	1	-	1	-	1	1	1	1	1	1	-	1	1	1	1	1	1	1	1	1	1	1	1	1	-
4293867	TGCAGCATTCCCGGCCACCGGCCCAGCGAGATTCGCGTCATGTTCAGCTCCGAGATCGGAAGAGCGGTT	1	1	1	1	-	1	1	1	1	1	1	1	-	1	1	1	1	1	1	1	1	1	1	1	1	1	1	1	1	1	1	1	1	1	1	1	1	1	1	1	1	1	1	1	1	1	1	1
4302720	TGCAGGAATAAAGTGGCTGTGCTTTTGGGGCCATGGTGTTCCAAGTGTGAACGTATCTGCATACCGAGA	1	-	1	1	0	1	1	1	1	1	1	-	1	1	1	1	1	1	-	-	1	1	1	1	1	1	1	-	1	1	-	1	1	1	1	1	1	1	1	1	1	1	1	1	1	1	1	1
4289632	TGCAGCTAATGGTTTAGCATGATTCCGGCAATGCGATCGAGCTAGTGAGATAGAGTATGATTTATTTTA	1	-	1	1	1	1	1	1	1	1	1	1	1	1	1	1	1	1	1	1	1	1	1	1	1	1	1	0	1	1	1	1	1	1	1	1	1	1	1	1	1	1	1	-	1	-	1	1
4296157	TGCAGCGCCCGGCCGAAGGAGAAGGTGAGCGTCCAGGGCTTGAGCACCGAGATCGGAAGAGCGGTTCAG	-	1	1	1	1	-	1	1	1	1	1	1	1	-	1	1	1	1	1	1	1	1	1	1	-	1	1	1	1	1	-	1	1	1	1	1	1	1	1	1	1	1	1	1	1	1	1	1
4263596	TGCAGCAGGTTTTGAAAAGGGAATCGATCGTGATTTGGAACCTGTTCTTTACATGAACCCTCTTAACTA	1	1	1	1	1	1	1	-	1	1	-	-	-	1	1	1	-	1	1	1	1	1	1	1	1	1	1	1	1	1	-	-	1	-	0	-	1	1	1	-	1	1	1	1	1	1	-	1
4326062	TGCAGCTCGCCCATGCCGGCGCCGAAGCACCGCTTGCACCGATCAGTCGCCGCTACAGCTGCCGCGCAT	1	1	1	1	1	1	1	1	1	1	1	1	1	1	1	1	1	1	1	1	1	1	1	1	1	1	1	1	1	1	1	1	1	1	1	-	1	1	-	1	1	1	1	-	1	1	1	1
4322438	TGCAGCAGCTCGGGCTCTTCCTGCATGCCATAAATGGCCCACAAAAAAGAAGAATCCGAGATCGGAAGA	1	1	1	-	1	1	1	1	1	-	1	1	-	0	1	1	1	1	-	1	1	1	1	1	1	1	1	1	1	1	1	1	1	1	1	-	1	1	1	1	1	1	1	1	-	1	1	-
4326248	TGCAGCTTCATGTCCCTCAGCAGCTGGATGAGGTCGTTGAACCGAGATCGGAAGAGCGGTTCAGCAGGA	-	-	1	1	-	1	1	1	1	1	1	-	1	1	1	1	1	1	1	1	1	1	1	-	1	0	-	1	1	-	1	1	1	1	1	1	1	1	1	1	1	-	1	1	-	1	1	1
4326506	TGCAGGTCCTCAACGCCAGCCACAACCAGTTCCAAGGCCAGGTCCCGAGCGCCGAGATCGGAAGAGCGG	1	1	1	1	1	1	1	1	1	1	1	1	1	1	1	1	1	1	1	1	1	1	1	-	1	1	1	1	1	1	1	1	0	1	0	1	1	1	1	1	1	1	1	1	1	1	1	1
4272827	TGCAGGAAGTAGAGGTGCTCGTCCTCGGCGAGGCAGTAGAAGAGCGCGAGCGAGACCCGAGATCGGAAG	1	-	1	1	1	1	1	1	0	0	0	1	1	1	1	1	1	1	1	1	1	1	1	1	1	1	1	1	1	1	1	1	1	1	1	1	1	1	1	1	1	1	1	-	1	1	1	1
4277861	TGCAGGGAGTCGCCAACGTTGACGAAGAGGGAATCCGAGATCGGAAGAGCGGTTCAGCAGGAATGCCGA	1	1	1	1	1	1	1	1	1	1	1	1	-	1	1	1	1	1	-	1	1	1	1	1	1	1	1	1	1	1	1	1	1	1	1	-	-	1	1	1	1	1	1	1	1	1	1	1
4297791	TGCAGGGTACAGCGAGGCCTTGTGCATCGTCCGTCCGAGATCGGAAGAGCGGTTCAGCAGGAATGCCGG	-	1	1	1	1	1	1	1	1	-	1	1	1	-	1	1	-	1	1	1	1	1	1	1	1	0	1	1	1	1	1	1	1	1	1	1	1	1	1	1	1	1	1	1	1	1	1	1
4270997	TGCAGGAGCGACGTCTTGGGCATCACGAACGACACGTTGTTGATGCTCGCCGCGAACCGAGATCGGAAG	1	-	1	1	1	1	1	1	1	1	1	1	1	1	1	1	1	1	1	1	1	1	1	1	1	1	1	1	1	1	-	1	1	1	1	1	1	1	1	-	-	1	1	1	-	1	1	1
4288990	TGCAGCCGACGGACGCGTTCCTCGCGAAGGACCCGAGATCGGAAGATCGGTTCAGCAGGAATGCCGAGA	1	1	-	-	1	1	1	1	0	0	0	1	1	1	1	1	1	1	1	1	1	1	1	1	1	1	1	1	1	-	1	1	1	1	1	1	1	1	1	1	1	1	1	1	1	1	1	1
4280569	TGCAGGGACAGTTCGTCGGAGTGCAGCGATGACGCTGTCTCCGAGATCGGAAGAGCGGTTCAGCAGGAA	1	1	1	1	1	1	1	1	1	1	1	-	1	1	1	1	1	1	1	1	1	1	1	1	1	1	1	1	1	1	1	1	1	1	1	1	1	1	1	1	1	1	1	1	1	1	-	1
4279531	TGCAGGGGATCGTTTTCCTATGGCTGAGCGCCATGATACCCGAGATCGGAAGAGCGGTTCAGCAGGAAT	-	-	1	1	1	1	1	1	1	1	1	1	1	1	1	1	1	1	1	-	1	1	-	1	1	1	-	1	1	-	-	1	1	1	1	1	1	1	1	1	1	1	1	-	-	0	1	1
4271313	TGCAGTATCCTCAACGCCGACGTGACGTTGGAGAAGCCATTGCCGAGATCGGAAGAGCGGTTCAGCAGG	1	1	1	1	1	1	1	1	1	1	1	1	1	-	1	1	1	-	1	-	1	1	1	1	1	1	1	-	1	1	-	1	1	-	1	1	1	-	1	1	1	1	1	1	1	0	1	-
4272852	TGCAGGCGATGGGGCATTGGGGAGAATTCAAGCTCGATCCGAGATCGGAAGAGCGGTTCAGCAGGAATG	1	1	-	-	1	1	1	-	1	1	1	1	1	1	1	1	-	1	1	1	1	1	1	1	1	0	1	1	1	1	1	1	1	1	1	-	1	1	1	1	1	1	1	1	1	1	1	1
4294030	TGCAGCAGCAGTTGGGTGGAACTGGAAGCAGTGCCGCTGATGCTGCCTCGGCGAGCGTCACGGCCCAGC	1	-	1	1	1	1	1	1	1	1	1	1	1	1	1	1	1	1	1	1	1	1	1	1	-	1	1	1	1	-	1	-	-	1	-	1	1	1	1	1	1	1	1	1	1	-	1	1
4280932	TGCAGGCCTAGACCATAAAGGTCCAGTGTTTTCAGGTACCGAGAGGCAAGAGGCAGGTCGTCCGAGATC	-	1	1	1	1	1	1	0	1	1	1	1	1	1	1	1	1	1	1	1	1	1	1	1	-	1	1	1	1	1	1	1	1	1	-	-	1	1	1	1	1	1	1	1	1	1	1	1
4274950	TGCAGGACAAACTAGATGCCCCTGAACCCGATGTGACCGAGATCGGAAGAGCGGTTCAGCAGGAATGCC	-	-	1	1	1	1	1	1	1	1	1	1	1	1	1	1	-	1	1	1	1	1	1	1	1	0	1	1	1	1	1	1	1	1	1	1	1	1	-	1	1	-	1	1	-	-	-	0
4300874	TGCAGAGGCGACCAAGCAACAGGCGACGGAGGAGAGGAAGCCGCCCAGATGCCCGAGATCGGAAGAGCG	1	1	1	1	1	-	1	1	1	1	1	1	1	1	1	1	-	1	1	1	1	1	1	1	1	0	1	1	1	-	1	1	1	1	1	-	1	1	1	1	1	1	1	1	1	-	1	1
4299615	TGCAGTGCGCGCGTTCCCCCTCCCATCGATCGACTTCGTGTCTGAACCGAGATCGGAAGAGCGGTTCAG	1	-	1	1	-	1	1	0	1	1	1	1	1	1	-	1	1	1	1	1	1	1	1	1	1	1	1	1	1	1	-	1	1	1	1	-	1	-	1	-	1	1	1	1	1	1	1	1
4264713	TGCAGGTGTTGGTGCCGCCCGTGCAGTCGAGGACCTGTTGCTCCGACATGGAGATGAGGTTGCCGAGAT	1	1	0	1	1	1	1	1	0	1	-	1	1	1	1	1	1	1	1	1	1	1	1	1	1	1	1	-	1	1	1	1	1	1	1	1	1	1	1	1	1	1	1	1	1	1	1	-
4267149	TGCAGCTCCACCAGGTGCAGCAGGTAGACGGCCACCGAGATAGGAAGAGCGGTTCAGCAGGAATGCCGA	1	-	1	1	1	1	0	1	1	1	1	1	1	-	1	1	-	1	1	1	1	1	1	1	1	1	1	-	1	-	1	-	1	1	1	1	1	1	1	1	1	1	0	1	1	-	1	1
4268430	TGCAGACTGTGTGCAATTCCACGTGGGCCCCGTACCTTACTGTCCGAGATCGGAAGAGCGGTTCAGCAG	1	1	1	1	-	1	1	1	1	1	1	1	1	1	1	1	-	1	1	1	1	1	1	-	1	0	1	1	1	1	1	-	1	1	1	1	1	1	1	1	1	1	1	1	-	1	1	-
4271241	TGCAGCCGCTTCGGGTTCTGCGGCAGCACGGCCGACTACTGCGGCGCCGAGATCGGAAGAGCGGTTCAG	1	1	1	1	1	1	1	-	0	0	0	-	1	1	1	1	1	1	1	1	1	1	1	1	1	1	1	1	1	1	-	1	-	1	1	-	1	1	1	1	1	1	1	1	1	1	1	1
4329190	TGCAGTAATGGTCTAATCATGGATGCCATCGGTGAGCCCGAGAAGAAGCCGAGATCGGAAGAGCGGTTC	1	-	1	1	1	1	1	1	1	1	-	1	-	1	1	1	1	1	1	1	1	1	1	1	1	1	1	1	1	1	-	1	1	1	1	1	1	1	1	1	1	1	1	1	1	1	1	1
4276610	TGCAGCCTCCATCAAAGAAGCGCCGAGATTGGAAGAGCGGTTCAGCAGGAATGCCGAGACCGATCTCGT	1	1	1	1	1	1	1	0	1	1	1	-	1	1	1	1	1	1	1	1	1	1	1	1	1	1	1	1	1	1	-	1	1	1	1	1	1	1	1	1	-	1	-	1	1	-	1	-
4322604	TGCAGCAAGAAGCGACAGCAGCTGGGCGCTGCGTGGGCGTTGGCGCGCGCGGAGGCGCGGCCATGGGTG	1	1	1	1	1	1	1	1	0	0	0	1	1	1	1	1	1	1	-	-	1	1	1	1	1	1	1	-	1	1	1	-	1	1	-	1	1	1	1	1	1	1	1	1	-	1	1	-
4289773	TGCAGACGCACGCCCTGCTCCGCGAGCTCGGCAACCCCGCCGAGATCGGAAGAGCGGTTCAGCAGGAAT	1	1	-	1	1	1	1	1	-	-	1	1	1	1	1	1	1	1	1	0	1	1	1	1	1	1	1	0	1	1	1	-	1	1	1	1	1	1	1	1	1	1	1	1	1	1	1	-
4278385	TGCAGAAAGGTTGGCGACGCGGGCAGTGAACTTCACCGAGATCGGAAGAGCGGTTCAGCAGGAATGCCG	-	-	1	1	1	1	1	0	1	1	1	1	1	1	1	1	1	-	1	1	1	1	1	-	1	1	1	1	1	1	-	1	1	1	1	1	1	1	1	1	1	1	1	1	1	1	1	1
4325987	TGCAGGTGAGATAAACTCAGGTTTTCAGTATGATCCGAGATCGGAAGAGCGGTTCAGCAGGAATGCCGG	-	1	1	1	1	1	1	1	1	1	1	1	1	1	1	1	1	1	1	1	1	1	1	1	1	1	1	1	-	1	1	1	1	1	1	-	1	-	1	1	1	1	1	1	1	1	-	1
4292567	TGCAGGTGCAGTTCAGTGAGGAGGATCTCCTCCCGTGGCAGTTTTGCCTTCTCCGAGATCGGAAGAGCG	1	-	1	1	1	1	1	1	1	1	1	1	1	1	1	1	-	1	1	1	1	1	1	1	1	1	1	1	1	1	-	1	1	1	1	1	1	1	1	1	1	1	-	1	1	1	-	-
4300723	TGCAGGAGGGTCGACACCACCGTCTACATCGTCTCCCTCGCCGAGATCGGAAGAGCGGTTCAGCAGGAA	-	-	1	1	1	-	1	1	1	1	1	1	1	-	1	1	1	-	1	1	1	1	1	1	0	1	1	1	1	-	1	1	1	0	1	1	1	1	1	1	1	1	1	1	1	1	1	1
4296336	TGCAGCCCGATGATGCAGTTGGCATGGAACGTGCACAACTTCCGAGATCGGAAGAGCGGTTCAGCAGGA	-	1	1	1	1	1	1	1	0	1	1	-	1	1	1	1	1	1	1	1	1	-	1	-	1	1	1	1	1	1	-	1	1	1	1	1	1	1	1	1	1	-	1	1	1	1	-	1
4300382	TGCAGACGGGCTCGGCCGTGTCGACGGGCCTGGCGCTCTCTCTGGAGGACCGAGATCGGAAGAGCGGTC	1	-	1	1	1	1	1	1	1	1	1	1	1	1	1	1	1	1	-	1	1	1	1	-	1	1	1	1	1	1	-	1	1	1	1	-	1	-	1	1	1	1	1	1	1	-	1	1
4270467	TGCAGGTTAATTTGGATCCTGCTAACATTACAGAAGAAGCTTCCGTTTCCTCTCTTAGATCCGTTCGTC	1	1	1	1	1	1	1	1	1	1	1	-	-	1	1	1	-	1	0	-	1	1	1	1	1	0	1	1	1	1	-	1	1	1	1	1	1	1	1	1	1	1	1	1	1	-	-	1
4293550	TGCAGGGCCTTGACGCGCGACATGATGGCGTGGAGCAGATCGTCCGAGATCGGAAGAGCGGTTCAGCAG	1	-	1	1	1	1	1	1	1	1	-	1	1	1	1	1	1	1	1	1	1	1	1	1	1	1	1	-	1	1	-	1	1	1	-	1	1	1	1	1	1	1	1	1	1	1	1	1
4313437	TGCAGCGCCAGCTCCACCACCAGGCTGGGCAGGCTCCGAGATCGGAAGAGCGGTTCAGCAGGAATGCCG	1	1	-	1	1	-	1	1	-	1	1	1	1	1	1	1	1	1	1	0	1	1	1	1	1	1	1	0	1	1	1	1	1	1	1	1	1	1	1	1	1	1	1	1	1	1	1	1
4328809	TGCAGACAAGAATGTTTTGGCACTAGTAGTTGAGTGATCTTTGTCCTTTGCAACTCCCTCTACTTATAG	-	1	1	1	1	1	1	1	1	1	1	0	-	1	1	1	1	1	1	1	1	1	1	-	1	1	1	1	-	1	1	1	1	1	1	1	1	-	1	1	1	1	1	1	-	1	-	1
4302080	TGCAGCTGGTGTCGGTGATGTTCGTGGGCCACCTGGGCGAGCTGCCCCTCGCCGAGATCGGAAGAGCGG	1	1	1	-	1	1	1	1	1	1	-	1	1	-	1	1	1	-	1	-	1	1	1	1	1	-	1	1	1	1	1	1	1	1	1	-	1	1	1	1	1	1	-	-	1	1	1	1
4274579	TGCAGCTGCGGTTGGGACCGTGTGCTGTCGTCGTTGGTCTCAGCCGAGATCGGAAGAGCGGTTCAGCAG	1	1	-	1	1	1	1	-	1	1	1	1	1	1	1	1	-	-	1	1	1	1	1	1	1	0	1	1	1	1	1	1	1	1	1	1	1	1	1	1	1	1	1	1	1	1	-	1
4317904	TGCAGAGAGGATTCTGACCACCAACCCAGAGCAGGTCCGAGATCGGAAGAGCGGTTCAGCAGGAATGCC	1	1	-	1	1	1	1	-	1	-	1	1	1	1	1	1	1	1	1	1	1	1	-	1	1	1	1	-	1	1	1	-	1	1	1	-	1	1	1	1	1	1	-	1	1	1	1	0
4301991	TGCAGTGCTCACTCATCCGAAAGTGCTACTCTTTCCGAGATCGGAAGAGCGGTTCAGCAGGAATGCCGA	-	-	1	1	1	1	-	1	1	1	1	-	1	1	1	1	1	1	1	1	1	1	1	-	1	1	1	1	1	1	-	1	1	1	1	1	1	1	-	-	1	1	1	1	1	-	-	1
4280675	TGCAGTCCCTGGTCCTCGTCGACAACAACCTCACGGGCGCCGTGCCGCCGAGATCGGAAGAGCGGTTCA	1	1	-	1	1	-	1	0	-	1	1	1	1	1	1	1	-	1	1	1	1	1	-	1	1	0	1	1	1	1	1	1	1	1	1	1	1	1	1	1	1	1	1	1	1	-	1	-
4296862	TGCAGCACGGGGAGCAGGAACGGTTTGGACGCGTTGGTGAACTCGCCGAGATCGGAAGAGCGGTTCAGC	1	1	-	1	1	1	1	-	1	1	1	1	1	1	1	1	1	1	1	1	1	1	1	1	1	1	1	1	1	1	1	1	1	1	1	1	1	1	1	-	1	1	1	1	1	1	1	1
4311960	TGCAGGACGTGCATTGCCTGGGCGACAGAGGGCCGCTCGCTCCGTTCCGAGATCGGAAGAGCGGTTCAG	-	1	1	1	-	1	1	-	1	1	1	1	1	1	1	1	1	1	1	1	1	1	1	1	1	1	1	0	1	1	1	1	1	1	1	0	1	-	1	1	1	1	1	-	1	0	-	1
4299321	TGCAGTTCCCGTCGGACATAGCCACCGTTCTTCTTGCCGCCGAGATCGGAAGAGCGGTTCAGCAGGAAT	1	1	1	1	-	1	1	1	1	1	1	1	1	1	1	1	1	1	1	-	1	1	1	1	1	1	1	1	1	1	0	1	1	1	1	0	1	1	1	1	1	1	1	1	1	1	-	-
4285027	TGCAGCAGTGCCCACCAGTGTGATCAACACCACGCCGAGATCGGAAGAGCGGTTCAGCAGGAATGCCGA	1	1	1	1	-	1	1	1	1	1	1	-	1	1	1	1	1	1	-	1	1	1	1	1	1	1	1	1	1	1	1	1	1	1	0	1	1	-	-	1	1	1	1	1	-	1	1	1
4292250	TGCAGCTTGGCCATCACCCGCGGGTTTCCGATGAGCTCCGCCATGACCCATTCCAGCGTGATAGATGAC	1	-	1	1	1	1	1	1	1	1	1	-	1	1	1	1	-	1	-	1	1	1	1	1	1	0	1	1	1	1	1	1	1	1	1	1	1	1	1	1	1	1	1	1	1	1	1	1
4273381	TGCAGGTGCATGCGACGATGAGCTCCTTGAGATGATAAGCGCCGAGATCGGAAGAGCGGTTCAGCAGGA	1	-	1	1	-	1	1	-	1	1	1	1	1	1	1	1	1	1	-	1	1	1	1	1	1	1	1	1	1	1	-	-	-	1	1	1	1	1	1	1	1	1	1	1	1	1	-	1
4269102	TGCAGGTCCAGGGCCCTGGTTCTACTTATCGTCGTCGCCACCAACACAGCCACCTTCCTCCTCTTCTCC	-	1	1	1	-	1	1	1	1	1	1	1	1	1	1	1	1	1	1	1	1	1	1	1	-	1	1	1	1	1	-	1	1	1	1	1	1	1	1	1	1	1	1	1	-	-	1	-
4289590	TGCAGTAGGTCCTTGGAGAAGGCCAGCAACTGGAGGCAACGCCGAGATCGGAAGAGCGGTTCAGCAGGA	1	1	1	1	1	1	1	1	1	1	1	1	1	1	1	1	-	1	1	1	1	1	1	1	1	0	1	1	1	1	1	1	1	1	1	-	1	1	1	1	1	0	1	1	1	1	1	1
4276766	TGCAGGAGTGCCAGGGCTTGGTAGCGGCCATGGAGCAGGCCGAGATCGGAAGAGCGGTTCAGCAGGAAT	1	-	1	1	-	1	1	1	1	1	1	1	1	1	1	1	1	1	-	1	1	-	1	-	1	1	-	-	1	1	1	1	1	1	1	1	1	-	1	1	1	1	1	1	1	0	1	1
4286287	TGCAGCGTTTGTGTTCGGCGATTCGATCGTCGATCCCGGCAACAACAACGACCGAGATCGGAAGAGCGG	1	1	1	1	1	0	1	-	1	1	1	1	1	1	1	1	1	1	1	1	1	1	1	1	1	1	1	1	1	1	1	-	1	1	1	1	1	1	1	1	1	1	1	1	1	1	1	0
4269454	TGCAGGGATGCTCGTGCCCTCCTTCCAGGCTCCGCCCTGGCTTCTATTGGTACGACAAGGTATCCGAGA	1	1	0	1	1	1	1	1	1	1	1	-	1	1	1	-	1	1	1	1	1	1	1	1	1	1	1	1	1	1	-	1	-	1	1	-	-	1	-	1	1	1	-	1	1	1	1	0
4326162	TGCAGACGCGCACGATACCGAGCCAGGAGAGGGGTCCGAGATCGGAAGAGCGGTTCAGCAGGAATGCCG	1	1	1	1	1	1	1	1	1	1	1	1	1	1	1	1	1	1	1	1	1	-	1	1	1	1	1	1	1	1	1	1	1	1	1	1	1	1	1	1	1	1	1	1	1	1	1	1
4269251	TGCAGGAGAAGAGGGGCTTCTTGTTCTGCAAGGAGGACAGGGCGATCCTGTGCCGAGATCGGAAGAGCG	1	1	1	1	-	1	1	1	1	1	1	1	1	1	1	1	-	1	1	1	1	1	1	1	-	1	-	1	1	1	1	1	1	1	-	-	1	1	-	1	1	1	1	-	-	-	0	1
4280141	TGCAGGCGAACGGCCACGTGTGCGGGACGATGGGCGACGGCGTGAACGACGCGCCCAGATCGGAAGAGC	1	1	1	1	1	-	1	1	1	1	1	1	1	1	1	1	1	1	1	1	1	1	1	1	1	1	1	-	0	1	1	1	1	1	1	-	1	1	1	1	1	1	1	1	1	-	1	1
4279595	TGCAGCATCCTGGCCCGCTCCTCGCACATGCTGACGAGCCGCTCCTCGGCGCGCTCCATGGTCTCCCGA	1	1	1	1	1	1	1	1	1	1	1	1	1	1	1	1	1	1	-	-	1	1	1	-	-	1	1	-	1	1	0	1	1	1	1	1	1	1	1	1	1	1	-	1	-	0	1	1
4284132	TGCAGGTAAGGAAGCCCTACCTTTCCTCGGATAATCGTACGTTTTGCCGTCAATTCTGCCCTGAACAAT	1	1	1	1	1	1	1	1	1	1	1	-	1	1	1	1	1	1	1	1	1	1	1	1	-	1	1	1	1	1	1	1	1	1	1	1	1	1	1	1	1	1	1	-	1	1	1	1
4277605	TGCAGCTCAATTCGTCCCTATCGATCCATCTACCTTCTCCGAGATCGGAAGAGCGGTTCAGCAGGAATG	-	-	1	1	-	1	1	1	1	1	1	1	1	1	1	1	1	1	-	1	1	1	1	-	1	1	1	1	1	-	1	1	-	1	1	1	1	1	1	1	1	1	1	-	1	1	1	-
4266545	TGCAGGGATCCCATCGTCTGCGACTATTGCAACAGGCAAGGCCACCGAGATCGGAAGAGCGGTTCAGCA	1	-	1	1	1	1	1	1	1	1	1	1	-	1	1	1	1	-	1	-	1	1	1	1	1	1	1	1	1	-	1	1	1	1	1	-	1	1	-	1	1	1	1	1	1	0	1	1
4302665	TGCAGTAAAGCCTCACGTCACAGCCGTACACGTCGGCTTTAACCGAGATCGGAAGAGCGGTTCAGCAGG	1	-	1	1	1	1	1	1	1	1	1	1	1	1	1	1	1	1	1	1	1	1	1	1	1	-	-	1	1	1	1	0	-	1	-	0	1	1	1	1	1	1	1	1	-	1	1	1
4266576	TGCAGGTGGTGAACGTGACGCACGCCCTGTGGACGTGGCACCGAGATCGGAAGAGCGGTTCAGCAGGAA	-	-	1	1	1	1	1	1	1	1	1	1	1	1	1	1	1	1	1	1	1	1	-	1	1	1	-	1	1	1	1	1	1	1	1	1	1	1	-	1	1	1	1	1	1	0	-	1
4273780	TGCAGCGACAACGTCACGGTGCGGGCCCTCGGCGACGTCTCTGGCTTCGCCGAGATCGGAAGAGCGGTT	1	-	1	1	1	1	1	0	1	1	1	1	1	1	1	1	1	1	1	1	1	-	1	1	1	1	-	1	1	-	-	1	-	1	1	1	1	1	1	1	1	1	1	1	1	1	1	1
4295934	TGCAGCCTAGAGCACAGCGCGGCGCACAATAATTTAGATGGAGGCGTCGTGCAAGTGCCCGATCTCTCG	-	1	1	1	1	1	1	1	0	0	0	1	1	1	1	1	1	1	1	-	1	1	1	1	1	1	1	1	1	1	1	1	1	1	1	1	1	1	1	1	1	1	1	1	1	-	1	-
4327560	TGCAGCAGCGGCGAGGCGTCGGCATCGTCGTCGTCCGAGATCGGAAGAGCGGTTCAGCAGGAATGCCGA	1	1	1	-	0	1	-	1	1	-	1	1	1	-	1	1	1	-	1	-	1	-	1	1	1	1	1	-	1	1	1	1	1	1	1	-	1	1	1	1	1	1	-	1	1	1	1	1
4273640	TGCAGAACGAAAAGGTTAGTCATTTGTCGACAATCGACACAAGCCATCTCTCCGAGATCGGAAGAGCGG	1	-	1	1	1	1	1	1	1	1	1	1	1	1	1	1	1	1	-	1	1	1	1	1	1	1	1	1	0	1	1	1	1	1	1	1	1	1	1	1	1	1	1	1	1	-	1	1
4304297	TGCAGCACCCGCAGCCTCTCCTTGTCGATGTACATGGGAGACTTCTCCTCCTGCTCCTCTTCCTCGGCG	1	1	0	1	1	1	1	1	1	1	1	-	1	1	1	1	1	1	1	1	1	1	1	1	-	1	1	-	1	1	1	1	1	1	1	-	1	1	1	1	1	1	1	1	1	1	1	1
4276720	TGCAGCGAGTTGCGTCCACCAATCACCTGCACCTGCGGTCCGCGCGCCTAGGCTCCGAGATCGGAAGAG	1	-	1	1	1	1	1	1	1	1	1	1	1	1	1	1	-	1	1	1	0	1	1	1	0	1	1	1	1	1	1	1	-	1	-	1	1	1	1	-	1	1	1	1	1	-	1	1
4281107	TGCAGCAAGAGCGGTACAGCAGCACGGAGGATTCCCGAGATCGGAAGAGCGGTTCAGCAGGAATGCCGA	1	1	1	1	1	1	1	1	1	1	1	1	1	-	1	1	1	1	1	1	1	1	1	1	1	1	-	-	1	1	1	1	1	-	1	0	1	1	1	1	1	1	1	1	-	0	-	1
4276826	TGCAGAGCGCGATCTTGCACCAGGATGTCATCGCGGCGAGGATGCAGCCGCCGAGATCGGAAGAGCGGT	1	-	1	1	-	1	1	1	1	1	1	0	1	1	1	1	1	1	-	1	1	1	1	-	1	1	1	1	1	1	1	1	1	1	1	0	1	1	1	1	1	1	1	1	1	-	1	1
4295524	TGCAGGGTGTCGCGCACGGAGGCCACGACGTCCGCCTGCCGCCGCTCCATCGCCATCAGCCGAGATCGG	1	1	1	1	1	1	1	1	1	1	1	1	1	1	1	1	-	1	1	1	1	1	1	1	1	0	1	1	1	1	-	1	1	1	1	1	1	1	1	-	1	1	1	1	1	0	-	1
4275029	TGCAGAAGAGCTCCTCCTCCCCCTCCATGGAGTTCATCTACATCGGCTGCCTCCGCGAGGACGTGCCGG	1	1	1	1	1	1	1	1	1	1	1	1	1	1	1	1	-	1	1	-	1	1	1	1	1	-	1	1	1	1	-	1	1	1	1	1	1	1	1	1	1	1	1	1	1	1	1	1
4286477	TGCAGGCAGGCAGCCTCTGCGCCGCGCGCTCCTGGGGACCCGAGATCGGAAGAGCGGTTCAGCAGGAAT	-	1	1	1	1	1	1	0	1	1	1	1	1	-	1	1	-	1	1	1	1	1	1	1	1	0	1	1	1	1	1	1	1	1	1	1	1	1	-	1	1	1	1	1	1	1	1	1
4303721	TGCAGGTTTCACGTTCCCTTGTTGCTTTGGCGCTTCCGAGATCGGAAGAGCGGTTCAGCAGGAATGCCG	1	1	1	1	0	1	1	1	1	1	1	-	1	1	1	1	1	1	1	1	1	1	1	-	-	1	1	1	1	1	1	1	1	1	1	1	-	1	1	1	-	1	1	1	1	1	1	1
4328473	TGCAGGTGCTACACCTCCTGTCATGCAAGCTCAAGATAAGAACCGAGATCGGAAGAGCGGTTCAGCAGG	1	-	1	1	1	1	1	1	1	1	1	1	1	1	1	1	1	1	1	1	1	1	1	1	1	1	1	1	1	1	1	1	1	1	1	1	1	-	1	1	1	1	0	1	-	1	-	1
4286155	TGCAGGGGCAAGCAAAACGCTAGTCCAGCACGCACCATTGCCGTCCGAGATCGGAAGAGCGGTTCAGCA	1	-	1	1	1	1	1	0	1	1	1	1	1	1	1	1	-	1	1	1	1	1	1	1	1	0	1	1	1	1	1	1	1	1	1	1	1	1	1	1	1	1	1	1	1	1	1	1
4328546	TGCAGAGGAGAAGGTGACGCAGCGCCCACCCCACTGCGATCTTGCTTGAACGAACCACCGAGATCGGAA	1	-	1	1	0	1	1	1	1	1	1	1	1	1	1	1	1	-	1	1	1	1	1	-	1	1	1	1	1	1	1	1	1	1	1	-	1	1	1	1	1	1	1	1	-	0	1	1
4326515	TGCAGCTTCTACTGCTGTTTTCTGGAACCTGAAGAACCGAGATCGGAAGAGCGGTTCAGCAGGAATGCC	-	-	1	1	-	1	1	1	1	1	1	1	1	1	1	1	-	-	1	-	1	1	1	1	1	0	1	1	1	1	1	1	1	1	1	1	1	1	1	1	1	1	1	1	1	1	-	1
4288934	TGCAGGAGGAAGAACATGGCCTTCTTTCTTCTTTGCCCACAGAACTGCATAAAGGCCGAGATCGGAAGA	1	-	1	1	-	1	1	1	1	1	1	1	-	1	1	1	-	1	-	1	1	1	1	1	1	1	1	-	1	1	-	1	1	1	1	-	1	-	1	-	1	1	1	1	-	0	1	-
4273644	TGCAGATCAGCGCGAGCCGCCTCCTCCCCTGCGAGCCCGAGATCGGAAGAGCGGTTCAGCAGGAATGCC	1	1	1	1	1	1	1	1	1	1	1	1	1	1	1	1	1	1	0	1	1	1	1	1	1	1	1	1	-	1	-	1	1	1	1	0	1	1	1	1	1	1	1	1	1	1	1	-
4320816	TGCAGGAAAGCAACGTCATGATGGGCTCACGGCAGTGCTTTATCCTAACCAAACGCATACCGAGATCGG	1	-	1	1	1	1	1	1	1	1	-	1	1	1	1	1	-	1	0	1	1	1	1	1	1	0	1	1	1	1	1	1	1	1	1	-	1	1	1	1	1	1	1	-	1	1	-	1
4270766	TGCAGTACCTCACCGAACTGGACCTGAGCAACAACCTGTTCTCCGAGATCGGAAGAGCGGTTCATCAGG	1	1	1	1	1	1	1	1	-	-	0	1	1	1	1	1	1	1	1	0	1	1	1	1	1	1	1	1	1	1	-	1	1	1	1	1	1	1	1	1	1	1	1	1	1	1	1	1
4266236	TGCAGCTGCAACATATATAAGTCATCGGTGCCACTCTCTCGCAGGCCGAGATCGGAAGAGCGGTTCAGC	1	1	1	1	1	1	1	1	0	1	1	1	1	1	1	1	1	1	1	1	1	1	-	1	1	1	1	1	1	1	1	1	1	-	1	1	1	1	1	1	1	1	1	1	1	0	1	1
4282552	TGCAGCGTCTTGGAGATCATCTTCCTCAGCGACCTCCTCGCTTTCCTCTTCGGGCTGGCCGAGATCGGA	1	1	1	1	1	1	1	-	1	1	1	0	-	1	1	1	1	1	-	-	1	1	1	1	1	1	1	1	1	1	1	1	1	1	-	1	1	1	1	1	1	1	-	0	1	1	1	1
4294495	TGCAGGTGGGCGAGATCATTCACCTTCTGCGCTACGAGCGGAAACATCTTGCACATCTTGGCCCGAGAT	1	1	1	1	1	1	1	1	1	1	-	1	1	1	1	1	1	1	1	1	1	-	1	-	1	1	-	1	1	1	0	1	1	1	1	1	1	1	1	1	1	1	1	1	-	1	1	1
4285550	TGCAGGATCTGAGAAAGATGCTGGACGAAGGGAAGGAGCTCGGGATGCCGAGATCGGAAGAGCGGTTCA	1	1	1	1	-	1	1	1	1	1	1	1	1	-	1	1	-	1	1	1	1	1	1	-	1	1	1	1	1	1	1	1	1	1	1	1	1	1	1	1	1	-	1	-	1	-	0	1
4274937	TGCAGCTGGGTGCAGTGTCCATCCAACATCAGGTCTCCGAGATCGGAAGAGCGGTTCAGCAGGAATGCC	1	-	1	1	1	1	1	1	1	1	1	1	1	1	1	-	1	1	1	1	-	-	-	-	1	-	1	1	1	1	1	1	1	1	1	1	1	1	1	1	1	1	1	1	-	1	0	1
4280251	TGCAGCTTATTCGGGATTCGAAATCACCATAATCTTTAATCCGAGATCGGAAGAGCGGTTCAGCAGGAA	-	-	1	1	-	1	1	-	1	1	1	1	1	1	1	1	1	1	1	-	1	1	1	1	1	-	1	1	1	1	1	-	1	1	1	-	1	1	1	1	1	1	1	1	1	0	0	-
4274951	TGCAGGCCTCCTCGCACGCCCTCAAGAACCTCTCCTCCCGAGATCGGAAGAGCGGTTCAGCAGGAATGC	1	1	1	1	1	1	1	1	1	1	-	1	1	1	1	1	1	1	1	0	1	1	1	1	-	1	1	1	1	1	-	1	1	1	1	1	1	1	1	1	1	-	1	1	1	1	-	1
4284412	TGCAGGCGATCCAGCAGTTCACCAGGCTGACGTACCTGGACCTGGAGGACACCGAGATCGGAAGAGCGG	1	-	1	1	1	1	1	0	1	1	1	1	1	1	1	1	1	1	1	1	1	1	1	1	1	1	1	1	1	1	-	1	1	1	1	1	1	1	1	1	1	1	1	-	1	1	1	1
4325946	TGCAGGGAAGGACATAGTCATGGTGCTGCCCGAGATCGGAAAAGCGGTTCAGCAGGAATGCCGAGACCG	-	1	1	1	-	1	1	1	1	1	1	1	1	1	1	-	1	1	1	1	1	1	1	1	1	1	1	-	1	1	1	1	1	1	1	1	1	-	1	1	1	-	1	1	1	1	1	1
4293256	TGCAGAGCATCGCGGAAGGGCGAGACTGAAGCGGAGTAGTACACGGCCGAGATCGGAAGAGCGGTTCAG	1	1	1	1	1	1	1	1	1	1	-	1	1	1	1	1	-	1	0	1	1	1	1	1	1	0	1	1	1	1	-	1	1	1	1	1	1	1	1	1	1	1	1	1	1	1	-	1
4284473	TGCAGCGTCTTCTTGGTTACGCGTCAAGAATCCTCGCCGCGGTTGGTTTTTGCCGAGATCGGAAGAGCG	1	-	1	1	1	1	1	1	1	1	1	1	1	1	1	1	-	1	1	1	1	1	1	-	1	0	1	1	1	1	-	1	1	1	1	1	1	1	1	1	1	1	1	1	1	1	1	1
4286515	TGCAGTAGTTCGCAAACACATTTCCGAGATCAGAAGAGCGGTTCAGCAGGAATGCCGAGACCGATCTCG	1	-	1	1	1	1	1	0	1	1	1	1	1	1	1	-	1	-	1	1	1	1	1	1	1	1	1	1	1	1	1	-	1	1	1	1	1	1	1	1	-	1	1	1	1	-	-	1
4298382	TGCAGCAGCGACTTGAGGCAGAGGGACGCAGCCAGCGACGCTAGATCGTAAGGGCACGTCGCCGAGATC	1	-	1	1	1	1	1	1	1	1	1	1	1	1	1	1	1	1	1	1	1	1	1	1	1	1	1	1	1	1	1	1	1	1	1	-	1	1	1	1	1	1	1	1	1	1	0	1
4280243	TGCAGCAAGAACTTACGCCTCCTCTCGAGCGCTTTTTCTTCAATACGCTTCCTCTCGGCCTCGGAGGCC	-	1	1	1	1	1	1	1	1	0	1	1	1	1	1	1	-	1	-	1	1	1	1	1	-	0	1	1	1	1	1	1	-	1	1	1	1	1	1	1	1	1	1	1	1	1	1	1
4276246	TGCAGCAGCTTGCCGATCTTGTCCTTCACCTCGCTCAGCTCCCAGCCGGCCTTGCCGAGATCGGAAGAG	1	-	1	1	1	1	1	1	1	1	1	1	1	1	1	-	1	-	1	-	1	-	1	1	1	1	1	1	1	1	1	1	1	1	0	1	1	1	1	-	1	1	1	1	1	1	1	-
4301030	TGCAGCGGCGAGCACTAGCACGCAAGAGAGAGGACAGGTGAGTCGTGACCGAGATCGGAAGAGCGGTTC	1	1	1	1	1	1	1	1	1	1	1	1	1	1	-	1	1	1	1	1	1	1	1	1	1	1	1	1	1	1	1	1	1	1	1	1	1	1	1	1	1	1	1	1	1	1	1	1
4271384	TGCAGGTGATGCTGGACCTAAGCCGGAACAGGCTGTCCGAGATCGGAAGAGCGGTTCAGCAGGAATGCC	-	1	1	1	-	1	1	1	1	-	1	1	1	1	1	1	1	-	1	1	1	1	-	1	1	1	-	1	1	1	1	1	1	1	1	1	1	1	1	1	1	1	1	1	1	-	0	1
4288319	TGCAGTAGCGCACGGCTGCGGGGATTCATCTCTGACTGTGACGCTCCTCCGAGATCGGAAGAGCGGTTC	1	1	1	1	1	1	-	1	1	1	1	-	1	1	1	1	-	1	1	1	1	1	1	1	-	1	1	1	1	-	1	1	1	1	1	1	1	1	1	1	1	1	1	1	1	1	1	-
4264626	TGCAGGTGAAGCGAAGCTCCGAGTCGGTTGAGGACGTCGGCGACAAAGACGGTGACGACGTGAGGACGA	1	1	1	1	1	1	1	0	1	1	1	1	1	1	-	1	1	1	1	1	1	1	-	1	-	1	1	1	1	1	1	-	1	1	1	1	1	-	1	1	1	1	1	-	1	1	1	1
4296696	TGCAGATGAAGTAGTTTGTGCCTCGGGCGAGCGTGACGCGGTCGGCGCCGAGATCGGAAGAGCGGTTCA	1	1	1	1	1	1	1	-	1	1	1	1	1	1	1	1	1	1	1	-	-	1	1	1	1	1	1	1	1	1	1	1	1	1	1	1	1	-	1	1	1	1	1	-	1	-	1	1
4266799	TGCAGCGCCGCGCCCTTGCTCCGCGAGCCACTCAGACGCCGAGATCGGAAGAGCGGTTCAGCAGGAATG	1	-	1	1	1	-	1	1	1	1	1	1	1	1	1	1	1	1	1	1	1	-	1	1	1	1	1	1	1	1	1	1	-	1	-	1	1	1	1	1	1	1	1	1	1	0	-	1
4276804	TGCAGCGTCTGACCGCGCGCCGCTCGCCTTGGGTGTGACGCAGCCGAGATCGGAAGAGCGGTTCAGCAG	-	-	0	1	1	1	1	0	1	1	1	1	1	1	1	-	1	1	1	1	1	1	1	1	1	1	1	1	1	1	1	1	1	1	1	1	-	-	1	1	1	1	1	1	1	0	1	1
4286644	TGCAGATGGACTCGAAGGTGTCGATGAACGGTAGCTCCGGGTGCATGCTCCGAGATCGGAAGAGCGGTT	1	-	-	-	1	-	1	1	1	1	1	1	1	-	1	1	1	1	1	1	1	1	1	1	1	1	1	1	1	1	1	1	1	1	1	1	1	1	1	1	1	1	1	1	1	-	1	1
4286899	TGCAGACTCTCCCAAGATTCCTCTCCAACATGTTCACGGAGCCGAGATCGGAAGAGCGGTTCAGCAGGA	1	-	1	1	1	1	1	1	1	1	1	-	1	1	1	1	-	1	1	1	1	1	1	1	1	-	1	1	1	1	1	1	1	1	1	1	1	1	-	1	1	1	-	1	1	0	0	1
4300770	TGCAGCCGAACACCATGCCGCTGACCTTCGTGTTCCCCAAACCGAACCTGTCGGTGGCGAGGTAGCCGG	1	1	1	1	1	1	1	1	1	1	1	0	1	1	1	1	-	1	1	1	1	1	1	1	1	-	1	0	1	1	0	1	1	1	1	-	1	1	1	1	1	1	1	1	1	1	-	1
4304517	TGCAGGGTCAGCTTGTCCCCTTGACTGATCATGATTTGTGATAAGATAACCTGATAATGCATGAATTTG	1	1	1	1	-	1	1	1	1	0	-	1	-	1	1	1	1	1	-	0	1	1	1	1	1	1	1	1	1	1	1	1	1	-	1	-	1	1	1	1	1	1	1	1	-	-	0	1
4277342	TGCAGTGCTTCCTGATTGAAGTTGTGTGCGCGTGCATCTCAGGCTCGTTGTTTCCCCCGAGATCGGAAG	-	-	1	1	-	1	1	1	1	1	1	-	-	1	1	1	1	1	-	1	1	1	1	1	1	1	1	1	1	1	1	1	1	-	1	1	1	0	1	1	1	1	1	-	1	1	1	1
4287567	TGCAGGAGGGTGGGCCGCCACGTGGAGGAGAATGATATGGGAGGCGCCGAGATCGGAAGAGCGGTTCAG	1	1	1	1	1	1	1	1	-	-	0	-	1	1	1	1	1	1	1	1	1	1	1	1	1	0	1	1	1	1	-	1	1	1	1	1	1	1	1	1	1	1	-	1	1	1	1	1
4275192	TGCAGAAGATGGCCGTCTTCTTTGCGATGGCTGGGTCGACATTGCCCGAGATCGGAAGAGCGGTTCAGC	1	1	1	1	1	1	1	1	1	1	1	1	1	1	1	1	-	1	1	1	1	1	1	1	1	0	1	1	1	1	1	1	1	1	1	1	1	1	1	1	1	1	1	1	1	1	1	-
4275497	TGCAGGCATCGGAGCGCGAGCCTCTCCCGCGTTGCCTCCGAGATCGGAAGAGCGGTTCAGCAGGAATGC	1	-	-	-	1	1	1	1	0	0	1	1	1	1	1	1	1	1	1	1	1	1	1	-	1	1	1	1	1	-	1	-	1	1	1	1	1	1	1	1	1	1	1	1	1	1	1	1
4278795	TGCAGGTGGGTCCGTGACGTGGCTTTTTAGTTTCACCGAGATCGGAAGAGCGGTTCAGCAGGAATGCCG	1	-	1	1	1	1	1	1	1	1	1	-	-	1	1	1	1	1	1	1	1	1	1	1	1	-	1	1	1	1	1	1	1	1	-	-	1	1	1	1	1	1	1	1	1	1	1	-
4298783	TGCAGCCTGCTGCTGTTGGCGATCTTCTTGACGACCTTCTTGGCGTCGGGGTCACCGAGATCGGAAGAG	1	-	1	1	1	1	1	1	1	1	1	1	1	1	1	1	1	1	-	1	1	1	1	1	1	1	-	-	0	1	1	1	1	1	-	-	-	-	1	1	1	1	1	1	1	1	-	1
4273809	TGCAGCGTGCGCATGAGGTCCAGGTAGGAAGCAAACACGCGTAGCACGACGGCCGAGATCGGAAGAGCG	1	1	1	1	-	1	1	1	1	1	-	1	1	1	1	1	1	1	-	1	1	1	1	1	1	1	1	1	1	1	1	-	1	1	1	1	1	1	1	1	1	1	-	1	1	0	1	1
4291585	TGCAGCTTGAGCTTGAGGTCCCTGATGATGTGGAAGAGGCGCTTGTAGCCGAGATCGGAAGAGCGGTTC	1	1	1	1	1	-	1	1	1	1	1	1	1	1	1	1	1	1	1	-	1	1	1	1	1	1	1	1	1	1	1	1	1	1	-	-	1	1	1	1	1	1	1	1	1	1	1	1
4291124	TGCAGTGCAGCTTGGCTCATCGATCCTACAAATCGTGCAGGTATGGGAGCATTGGACGGCCGAGATCGG	1	-	1	1	1	1	1	1	1	1	1	-	1	1	1	1	-	1	1	1	1	1	1	1	1	1	1	1	1	1	1	1	1	1	1	-	1	1	1	1	1	1	1	1	1	1	-	1
4328543	TGCAGGTGCCGCCACGCCCACTCCGCCAGCGAGCAGTGCTCGCCGCCGTTGCCGAGATCGGAAGAGCGG	1	1	1	1	1	-	-	1	1	1	1	1	1	1	1	1	-	1	1	-	1	-	1	1	1	1	1	1	1	-	1	1	1	1	-	1	1	-	1	1	1	-	1	1	1	0	0	1
4288492	TGCAGCCGCGAGTTGGGGACGGTGACCATGACCTCCGCTCCGAGATCGGAAGAGCGGTTCAGCAGGAAT	1	-	1	1	1	1	1	1	1	1	1	1	1	1	1	1	1	1	1	-	1	1	1	1	1	1	1	1	1	1	1	1	1	1	1	1	1	1	-	1	1	1	1	1	1	1	1	1
4300426	TGCAGTACCGTCCTGTCCCCTCTCCTCTCCTCTGGCGCCAACTCACACGCAATACACCGAGATCGGAAG	1	-	1	1	-	1	1	1	1	1	0	1	1	1	1	1	1	1	1	1	1	1	1	1	1	1	1	1	1	1	1	1	1	1	1	1	1	1	1	1	1	1	1	1	1	1	-	1
4284610	TGCAGTGACTGCACGACAGCCGACGACCCACCTTCAGCAGCTCCCTCATGACCGAGATCGGAAGAGCGG	1	1	1	1	0	1	1	1	1	1	1	1	1	1	1	1	1	1	-	1	1	1	-	1	1	1	1	1	1	1	-	1	-	1	1	-	1	1	1	1	1	1	1	1	1	1	0	1
4327747	TGCAGGACCACAAGGACACCAGGAATCGGAGCATTTTTCTCCGAGATCGGAAGAGCGGTTCAGCAGGAA	1	1	1	1	1	1	1	1	0	0	1	1	1	1	1	-	1	1	1	-	1	1	1	1	1	1	1	-	1	1	1	1	1	1	1	1	1	1	1	1	1	1	1	1	1	1	-	1
4294505	TGCAGGGTGCCACGACGGAGGAGATGCATGGAGAAGAGGAAGAGGAAAGGAGACAGCTCCTCGTGCCTC	1	1	1	1	-	1	1	-	1	1	-	1	1	1	1	1	1	1	0	1	1	1	1	-	-	1	1	1	1	1	1	-	1	1	1	0	1	1	1	1	1	1	1	1	1	-	1	1
4298231	TGCAGGATTCTCGCCGATGCCCGCCGCTCCCGCCCCTACCCCCGAGATCGGAAGAGCGGTTCAGCAGGA	-	-	1	1	1	1	1	0	1	1	1	1	1	1	1	1	1	1	1	1	1	1	1	1	1	1	-	1	1	1	1	1	1	1	-	-	1	1	1	1	1	1	1	1	1	1	-	-
4296092	TGCAGGAGTGTTGCCTGGTCGCGGCAAATGCTAGTGGGGGAGAAGAAGTTTCTGCTGAATCAAATCCTA	1	-	1	1	1	1	1	0	1	1	-	-	1	1	1	1	1	1	-	1	1	1	1	1	1	1	1	1	1	1	1	1	1	1	1	0	1	1	1	1	1	-	1	1	1	-	1	-
4269410	TGCAGCATCTTGCTCACGTTGCTGGCGCCGAAGACCCTGTGCACGGTGGCGAACCGAGATCGGAAGAGC	1	1	1	1	1	1	0	1	1	1	1	-	1	1	1	1	-	1	1	-	1	1	1	1	1	-	1	1	1	1	-	1	-	1	1	-	1	1	1	1	1	1	1	1	1	1	1	1
4299468	TGCAGGTCCAAGGCCGACGTTTCCTAAATGCGGCCCGCAACTGCCTCCTCGTTCTCTTCCCTCTCCGAG	1	0	1	1	1	1	1	1	1	1	1	1	1	1	1	1	-	1	1	1	1	1	1	1	-	1	1	-	1	1	-	1	1	1	-	-	1	1	1	1	1	1	1	1	1	1	-	1
4328381	TGCAGCCACTCTCTCGCGTGCCGCCGCGGAACGGAACCGAGATCGGAAGAGCGGTTCAGCAGGAATGCC	1	1	1	1	1	1	1	1	1	1	1	1	-	1	1	1	1	1	1	-	1	-	1	1	1	-	1	1	1	1	1	1	1	1	1	-	1	1	1	1	1	1	-	1	1	1	-	1
4293689	TGCAGTGCATGCGTGCGTGAGTCAGCTAGTGCTAGTGCATGCGTGAAGTGTGCGTGCTAGCCATCGGTG	1	-	1	1	1	1	1	1	1	1	1	-	1	1	1	1	1	-	-	1	1	1	1	1	1	1	1	1	1	1	1	-	1	1	1	0	1	-	1	1	1	1	1	1	1	0	1	1
4275180	TGCAGGGCCCGCTCACCAGGCTGCTCGGCGGCATCTTCCACCTCTTCCCCGCCGAGATCGGAAGAGCGG	1	1	1	1	-	1	1	1	1	1	1	1	-	1	1	-	1	1	-	-	1	1	1	1	1	1	1	1	1	-	1	1	1	1	-	1	1	1	1	1	1	1	1	1	1	0	-	1
4274584	TGCAGTTGTTGCTGCCCCAGTCTGGCCCAACCTGGCATTTTCCTTTCCACCTTGATGGCACCGAGATCG	1	1	1	1	1	1	1	1	1	1	1	-	1	1	1	1	1	1	1	1	1	1	1	1	1	1	1	1	1	1	1	1	1	1	1	-	1	1	1	1	1	1	1	1	1	1	1	1
4280832	TGCAGAAGTCGCCCCGACAAGTACGTCATTGACAGTCTCCGAGATCGGAAGAGCGGTTCAGCAGGAATG	1	0	1	1	-	1	1	1	1	1	1	1	-	1	1	1	1	1	1	1	1	1	1	-	1	1	1	1	-	1	-	1	-	1	1	0	1	1	1	1	1	1	1	1	1	1	1	-
4271756	TGCAGCCACACCAAACACCACGAATCAATCCCCATTGCCGAAATTTGGCTCTTACCCGCTCCATCTCAA	-	-	1	1	1	1	1	1	1	1	1	-	1	1	1	1	1	1	-	-	1	1	1	1	1	1	-	1	1	1	0	-	1	1	1	-	1	-	1	1	1	1	-	-	-	1	0	1
4274012	TGCAGCCTTCGGGCGGCAGGGTTGGAGAGAAGCGATTGCACTTTGATAAAACCGAGATCGGAAGAGCGG	-	-	1	1	1	1	1	1	0	1	1	-	1	1	1	1	1	1	1	1	1	1	1	-	-	1	1	1	1	1	-	-	1	1	1	1	1	1	1	1	1	1	1	1	1	1	1	-
4287548	TGCAGTGATGGTGTTCCCCAAGTTCATCCCGAAGGGATCCGCGGGCAATAGATCCGCAGGGTCCGAGAT	1	1	1	1	1	1	1	1	1	-	1	1	-	1	1	-	1	1	1	1	1	1	-	-	-	1	1	1	1	1	1	1	1	1	1	1	1	-	1	1	-	1	1	1	1	1	1	1
4273752	TGCAGAAGCCACTCGACGGTCTCGCCGTCGGTCTTGTGGCCGAGCTCCCGCGTGAGCTGGAACACCCGC	1	-	-	1	1	1	1	1	1	1	1	1	1	1	1	1	1	1	1	1	1	1	1	1	-	1	1	1	1	1	-	0	1	1	1	0	1	1	1	1	1	1	1	1	1	1	-	1
4296162	TGCAGGGCGCGTGCGTGATGAACACGCTGGACTCCGTGGTGGACGCGCTGGCCAGGGACTCCGAGATCG	1	-	1	1	1	1	1	1	1	1	1	1	1	1	1	1	1	1	0	1	1	1	1	1	1	1	1	1	1	1	-	1	1	1	1	-	1	1	1	1	1	1	-	1	1	1	0	1
4301614	TGCAGCTCCCTCCGAGATGCCCCCGCTACAGCGTCCGAGATCGGAAGAGCGGTTCAGCAGGAATGCCGA	1	1	1	-	1	1	-	1	1	1	1	1	1	1	1	1	1	1	1	1	-	1	1	1	1	1	1	1	1	1	1	1	1	1	1	1	-	1	1	1	1	1	1	1	1	1	1	1
4277465	TGCAGATGCTCCCCGTCATGCCGCTCGACGCCGACGTGTTCCGGCAGCCGCCTGGCCACAATGCACCGA	-	-	-	-	1	1	1	1	-	1	-	1	1	1	-	1	1	-	1	1	1	1	1	1	-	1	1	1	1	1	1	1	1	1	1	1	1	1	1	1	1	1	-	1	1	1	1	1
4263667	TGCAGCATGGAGGGCGCCGAGTTCGTCCACGCCGTGGCCCCCGAGATCGGAAGAGCGGTTCAGCAGGAA	1	-	1	1	1	1	1	1	1	1	1	1	1	1	1	1	1	1	1	1	1	1	1	1	1	1	1	1	1	1	1	1	1	1	0	1	1	1	1	1	1	1	1	1	1	1	1	1
4279576	TGCAGCGGTTCATGGAGAAGCGCAAGGGAAGGGTCGCCACGCGCGCCGTCCCCTACAGCCGAGATCGGA	1	1	1	1	1	1	1	0	1	1	1	1	1	1	1	1	1	1	1	-	1	1	1	1	1	1	1	0	1	1	-	1	1	1	1	1	1	1	1	1	1	1	-	1	1	-	1	1
4280615	TGCAGCCACTCAGGCTCGAACTCCGAGCTGCTCCTGATGCCCACGAGCTGGCACCCTTCGATGGTCTTG	1	1	1	1	1	1	1	1	1	1	1	1	1	1	1	1	-	1	1	1	1	1	1	1	1	1	1	1	1	1	1	1	1	1	1	1	1	1	1	1	1	1	1	1	1	1	1	1
4276957	TGCAGCCGCATTTTATCAAACAGGTTGCGGACAAAGATCTCATCACACCACCGAGATCGGAAGAGCGGT	1	1	1	1	1	1	1	1	1	1	1	1	1	1	-	-	1	1	1	1	1	1	1	1	1	1	-	1	1	1	1	1	1	1	1	1	-	1	1	-	-	1	1	-	1	1	1	1
4299260	TGCAGGTTTAGCGCAGCAGAGCAAACAGAGGATTCACACGCCGAGATCGGAAGAGCGGTTCAGCAGGAA	1	1	1	1	1	1	1	1	1	1	1	1	1	1	1	1	-	1	1	1	1	1	1	1	1	-	-	1	1	1	1	1	1	1	1	1	1	1	1	1	1	-	1	0	1	-	-	1
4294844	TGCAGCTTCTGCCCCTTCTCCTCCGCAGCCTCCTTCGCTTTGCTAAGCTCCCTACGTAGTTTGTCCGAG	1	1	1	1	1	1	1	-	-	1	1	-	-	1	1	1	1	1	1	1	1	1	1	1	1	1	1	1	1	1	1	1	-	1	-	1	1	-	1	1	1	1	1	1	1	1	1	1
4276714	TGCAGTCCAACAGTCATCACGTGATGCCTAGACTATTCTTCACAACCGAGATCGGAAGAGCGGTTCAGC	1	1	1	1	1	0	1	1	1	1	1	1	1	1	1	1	1	1	1	1	1	1	1	-	-	1	1	1	1	1	1	1	1	1	1	-	1	-	1	1	1	1	1	1	-	1	1	-
4270778	TGCAGAGCACATACCCTGTAAGTGCAATATTATTACCGAGATCGGAAGAGCGGTTCAGCAGGAATGCCG	-	1	1	1	1	1	1	-	1	1	0	1	-	1	1	1	1	1	-	1	1	-	1	1	1	1	1	1	1	1	-	1	1	1	1	1	1	1	-	1	1	1	1	1	1	1	-	-
4302565	TGCAGAAGCGTGGGTGGCGGACGAGCGTGGCCTCGAGCCCGAGATCGGAAGAGCGGTTCAGCAGGAATG	1	1	1	1	1	1	1	1	1	1	1	1	1	1	1	1	1	1	1	0	-	-	1	1	-	1	1	1	1	1	1	1	1	1	1	-	-	1	1	1	1	1	1	1	1	-	0	1
4292679	TGCAGACGCTGTACAACCTGGGGGCGAGGAAGTTCGCGGTGATCGACGTGGCGCCGATCGGGTGCTGCC	1	1	1	1	-	1	1	1	1	1	-	1	1	1	1	1	1	1	1	-	1	1	1	1	1	-	1	-	1	1	1	0	1	1	1	-	1	1	1	1	1	1	-	1	1	-	1	1
4265865	TGCAGCCCGATCATGGCGAACACGTCCGACAGCCCGAACAGCACGTACTGCGGCACCATCCACCACAGG	1	-	1	1	1	1	1	1	1	1	1	-	1	1	1	1	1	1	1	1	1	1	1	-	1	1	1	1	1	1	1	1	1	-	-	0	1	1	1	1	1	1	1	1	1	1	1	1
4283353	TGCAGGCTGCCGAGCACCGACATCCCCCGCATGCTCACCATCCCGAGGCAGGCTACCCCGAGATCGGAA	1	1	1	1	1	1	1	1	1	1	1	1	1	1	1	1	1	1	1	1	1	1	1	-	1	1	1	1	1	1	1	1	1	1	1	1	1	1	1	1	1	1	1	1	1	0	1	1
4291671	TGCAGCTCCTCACTTAGAGCCCAATTGGCCGCTCCCGAGATCGGAAGAGCGGTTCAGCAGGAATGCCGA	1	-	1	1	1	1	1	1	1	1	1	1	1	1	1	1	-	1	1	1	1	1	1	1	1	0	1	1	1	1	1	1	1	1	1	1	1	1	1	-	1	1	1	1	1	1	1	0
4293828	TGCAGCGCACCAGGCAGCAGCAAGGCATGTACGGGGGGAGCAACCCGAGATCGGAAGAGCGGTTCAGCA	1	-	1	1	1	-	-	1	1	1	1	1	1	1	1	1	1	1	-	1	1	1	1	1	1	0	1	1	1	1	1	1	1	1	1	1	1	1	1	-	1	1	1	-	1	1	1	1
4270012	TGCAGGATAGCACCCAACCCACACGTGGGCTAGTGGTCGCCGAGATCGGAAGAGCGGTTCAGCAGGAAT	1	1	1	1	1	1	1	1	1	1	1	1	-	1	1	1	-	1	0	1	1	1	1	1	-	0	1	1	1	1	1	-	1	1	-	1	1	1	1	1	1	1	1	1	1	1	1	-
4286374	TGCAGGTGCAGGCTGGACCTAGTATGCACGATGATCCCAAACACCTCGCCCATGTCCAGCGTCTCCGAG	1	1	1	1	1	1	1	1	1	1	1	-	1	1	1	1	1	1	-	1	1	1	1	-	1	1	-	1	1	1	1	1	1	-	1	1	1	1	1	1	1	1	1	1	1	-	1	0
4291632	TGCAGGAATCGAGCTCACGCGACAATGGACGTCCGAAGATCCAGGCGTGGTCGCCGAGATCGGAAGAGC	1	1	1	1	1	1	1	1	1	1	1	0	1	1	1	1	1	1	1	1	1	1	1	-	1	1	1	1	1	1	1	1	1	1	1	-	1	1	1	1	1	1	1	1	-	0	1	1
4325249	TGCAGGTTGTCTCCAGCCAGCAGCTCTTTCACCATAACCATCAGCACCTAGATACACCTGCCTTCCATC	1	1	1	1	-	1	1	1	1	1	1	1	1	1	1	1	1	-	-	1	1	1	1	-	-	1	1	-	1	-	1	1	1	1	1	-	1	-	1	1	1	1	1	1	1	1	1	1
4303658	TGCAGAATTACATCATCAAGAGTCAATTGTAGCTCCAGACATAAGCCGAGATCGGAAGAGCGGTTCAGC	1	1	1	1	1	1	-	1	1	1	1	1	1	1	1	1	-	1	1	1	1	1	1	-	1	1	1	1	1	1	1	1	1	1	1	1	1	1	1	1	1	1	1	1	1	0	0	1
4270715	TGCAGGACGTGTTCATGCGCCTGACGTTCGACCTCACGGCGATGTTCATATTCGGCAGGGATCCCGAGA	1	-	1	1	1	1	1	1	1	1	1	1	1	1	1	1	1	1	0	1	1	1	1	1	1	1	1	1	1	1	1	1	1	1	1	0	1	-	-	1	1	1	1	1	1	-	1	-
4293375	TGCAGCGGGAGGGTACGACGGCGTCCACCACGACAGCTCGGTGAAGAAGCACGGCTACGGGGAGAAGGC	-	-	1	1	1	1	1	1	1	1	1	1	-	1	1	1	1	1	1	1	1	1	1	1	1	1	1	-	1	1	-	1	1	1	1	1	1	1	1	1	1	1	1	1	1	1	-	1
4265765	TGCAGGCACTGGTGGCGTTTGGCAAGGCGGCGCACGCAGAAGCCATGCGCTACAGCGACATGGAGGAGG	1	1	1	1	-	1	1	1	1	1	1	1	-	1	1	1	1	1	1	1	1	1	1	-	1	1	1	1	1	1	1	1	1	1	-	1	1	1	1	1	1	1	1	1	1	1	0	1
4273594	TGCAGTGGAGGCAACCGTCGAGTTCCTGAACAAGGCGGTGAAGCCAGTGCTTGTCGCCGAGATCGGAAG	1	-	1	1	1	1	1	1	1	1	1	1	1	1	1	1	1	-	-	1	1	1	-	1	1	1	1	1	1	1	1	1	1	1	1	1	1	1	-	1	1	-	1	1	-	0	0	1
4265760	TGCAGTGCCTCAATGATCAGATGGGGGAAGACGACGTCAGCCTGGTGGCAATGAGCACCAACGACGGCG	1	-	1	1	-	1	1	-	1	1	1	-	1	1	1	1	-	1	0	1	1	1	1	1	1	1	1	1	1	1	1	1	1	1	1	1	1	-	1	1	1	1	1	1	-	1	1	1
4271383	TGCAGAGGAACTCCCTCACGCACCGAGATCGGAAGAACGGTTCAGCAGGAATGCCGAGACCGATCTCGT	1	-	1	1	1	-	-	-	1	1	1	-	1	1	-	1	1	-	0	1	0	1	1	1	1	1	1	1	-	1	1	1	1	1	1	1	1	1	1	1	1	1	1	1	1	1	1	-
4272868	TGCAGGTCCAGCCGCCGCAGCGCGGCGAGCTTGGCGAGGGACCCCGAGATCGGAAGAGCGGTTCAGCAG	1	1	-	1	1	-	1	-	-	1	1	1	1	1	1	1	1	1	1	1	1	1	1	1	-	0	1	1	1	1	1	1	1	1	1	-	1	1	1	1	1	1	1	1	1	1	1	1
4288729	TGCAGAGCCCCTCGACCAAAATCGGGGAAATGGGAAAGGCTGCGAAGGAACGCGAGCCGAGATCGGAAG	1	-	1	1	1	1	1	1	1	1	1	1	1	1	1	1	1	1	0	1	1	1	1	1	1	1	1	1	1	1	0	-	1	1	1	1	1	-	-	1	1	1	1	1	1	0	-	-
4299307	TGCAGCGGTGGAGTTCGTGGAGCGCGTCGGCTTCTACGGCGTGCAGGGCAACCTGATCATGTACCTCAC	1	1	-	1	1	1	1	0	-	1	-	1	1	1	-	1	1	1	1	0	1	1	1	1	1	-	1	1	1	1	0	1	1	1	1	1	1	1	1	1	1	1	1	1	1	1	1	1
4327307	TGCAGATCCACGCCATCTGATCTGCTGACACGAAAAGGCCGAGATCGGAAGAGCGGTTCAGCAGGAATG	1	1	1	1	1	1	1	1	1	1	-	1	1	1	1	1	1	1	1	1	1	1	1	1	1	1	1	-	1	1	1	1	1	1	1	1	1	1	1	1	1	-	1	1	-	0	1	1
4289009	TGCAGTATAAATGAGCCGTCAGAACAGTAAGCTATCCGAGATCGGAAGAGCGGTTCAGCAGGAATGCCG	1	1	1	1	-	1	1	1	1	1	1	-	-	1	1	1	1	1	-	1	1	1	1	-	1	1	1	1	-	1	1	1	1	1	1	0	1	1	0	1	1	-	1	1	1	0	1	1
4298273	TGCAGCAGCTGCCGCGACACCACGAGCGGCACCTCATCCGACACCACTGCGTTCGCAACAATCCCGAGA	-	1	1	1	1	1	-	1	1	1	1	1	1	1	1	1	1	1	-	1	1	1	1	1	1	1	1	1	1	1	-	1	1	1	1	1	1	1	1	1	1	1	1	1	1	0	1	1
4298558	TGCAGCAGGATGCTGGGAATGAAATACGAGTCGCAGAGGGGATACATTGGACTGGAATATTATGGACGG	1	1	1	1	1	1	1	1	1	1	1	1	1	1	1	-	-	1	1	1	1	1	1	1	1	1	1	1	1	-	1	1	1	1	1	1	1	1	1	1	1	-	-	1	1	-	-	1
4275467	TGCAGTGGTAGGCGTCGGAGGAGGAGACGACCCTGGCCGAGATCGGAAGAGCGGTTCAGCAGGAATGCC	-	1	1	-	1	1	-	1	0	1	1	1	1	1	1	1	1	1	-	-	-	1	1	1	1	0	1	1	1	-	1	1	1	1	1	0	1	1	1	1	1	1	1	1	1	1	-	1
4321437	TGCAGCGGAAGCGGAAGCTGAGATGGCTGCGCCGTCCAACTCCTAACGCGCTTCTGAGTGGCCTCATTC	1	-	1	1	1	1	1	1	0	0	0	1	1	1	1	1	1	1	1	1	1	1	1	-	1	1	1	1	1	1	1	1	1	1	1	1	1	1	1	1	1	1	1	1	-	1	1	1
4296146	TGCAGCTGGACGCCCAAGCTGGTGTTGAGAGGGAACTTGTTGCCGAGATCGGAAGAGCGGTTCAGCAGG	1	-	1	1	1	1	1	1	1	1	1	-	1	1	0	1	1	1	1	-	-	-	1	-	1	1	1	1	1	1	-	1	1	0	1	1	0	1	1	1	1	1	1	1	-	1	1	1
4329074	TGCAGCACAGCTCGTCCGCCGCCAAAGATGTTCTCGCCGAGATCGGAAGAGCGGTTCAGCAGGAATGCC	1	0	1	1	-	1	1	1	1	1	1	1	1	1	1	1	1	1	-	-	1	1	1	1	1	1	1	1	1	1	0	1	-	1	1	1	1	-	1	1	1	1	1	1	1	-	0	1
4276337	TGCAGACATATTCTATCGCCCCACCGACGGAGATACCCACGCCGCGCCCGAGATCGGAAGAGCGGTTCA	1	1	1	1	1	1	1	1	1	1	-	1	-	1	1	1	1	1	0	1	1	1	1	-	1	1	1	1	1	1	1	-	1	1	1	1	1	1	-	1	1	1	1	1	1	1	1	1
4282680	TGCAGGTGCAGCGGTTCTTGACACTAGTAGTACCTGGTCTACGAACACCGAGATCGGAAGAGCGGTTCA	1	-	1	1	-	1	1	1	1	1	1	1	1	1	1	-	1	-	1	1	-	1	1	1	1	-	1	-	1	1	0	1	1	1	1	0	1	1	1	-	1	1	1	1	1	1	-	1
4287332	TGCAGGCAGCCCCGCGCCTCAGCCTCCACCTGACCCCGTCCGAACACCGTGGCCGAGATCGGAAGAGCG	1	1	1	1	1	1	-	1	1	1	1	1	1	1	1	1	1	1	-	1	1	1	1	1	1	1	1	1	1	1	0	1	1	1	-	1	1	1	1	1	1	1	1	1	1	1	1	0
4269218	TGCAGGCCACTGCTCCACGGCTCTGCTCGGATATAGGGCCGAGATCGGAAGAGCGGTTCAGCAGGAATG	1	-	1	1	1	1	1	1	0	0	0	1	1	1	1	1	1	1	1	1	1	1	1	1	1	1	1	-	-	1	1	-	1	1	1	1	1	-	1	1	1	1	1	1	1	1	1	1
4268974	TGCAGAAAGAGGCCTCCTGCCGTGAATGCCTTTATCCATGGAGTAACTGATAATTAGCACAAGATCTAT	-	-	1	1	-	1	1	1	1	1	1	1	1	1	1	1	1	1	1	0	1	1	1	1	1	1	-	1	1	1	1	1	1	1	-	-	1	1	0	1	1	1	1	1	1	1	1	1
4326232	TGCAGAGATAGACCGACGAGCTGCTGCCGCCGCTGCTCTCCGAGATCGGAAGAGCGGTTCAGCAGGAAT	1	-	1	1	1	1	1	1	1	1	1	1	1	1	1	1	-	1	1	-	1	1	1	1	1	0	1	1	1	1	1	1	1	1	1	1	1	-	1	1	1	1	1	1	1	1	1	1
4326173	TGCAGGGTCGTACACAGCCAGCGTCCGCTTGGAACCTGCGTAGCCCGGCGCGGCCTTAGGAAGAACGAT	1	1	1	1	1	1	1	0	1	1	1	-	1	1	1	1	-	1	1	1	1	1	1	1	1	-	1	1	-	1	1	-	1	1	1	1	1	1	1	1	1	1	1	-	1	1	1	-
4294224	TGCAGCGACTGTGAGTGCATTGTGAGTTTGTCCATGCCTACCAAACCGAGATCGGAAGAGCGGTTCAGC	1	1	1	1	-	1	1	1	1	1	1	-	1	1	1	1	-	1	1	1	1	1	1	1	1	0	1	1	1	1	-	1	1	-	1	1	1	1	1	1	1	1	1	1	1	1	-	1
4327203	TGCAGGTCGCGCTCGAGGTCCTCGAAGGTGGGGCCCGCCGAGATCGGAAGAGCGGTTCAGCAGGAATGC	1	1	1	1	1	1	1	1	1	1	1	1	1	1	1	1	1	1	-	-	1	1	1	1	1	1	1	-	1	1	1	1	1	1	-	1	1	1	1	0	1	1	1	1	1	1	1	1
4268133	TGCAGCGTCTCGGTGGACGGATCGTACAGGAGCTTCCTGGTCTCCACGGAGGACCGAGATCGGAAGAGC	-	1	1	-	0	1	1	1	1	1	1	1	1	1	1	1	1	-	1	0	1	1	1	1	1	1	1	1	1	1	1	1	-	1	1	-	1	-	1	1	1	1	-	1	1	1	1	1
4278832	TGCAGCAACATGCGGGGTGCCGGCGAGATGAGGTACATGATCCGAGATCGGAAGAGCGGTTCAGCAGGA	-	-	1	1	1	1	1	1	1	1	1	1	1	1	1	1	1	1	1	1	1	1	1	1	1	1	1	1	-	1	1	1	1	1	1	1	1	1	1	1	-	1	1	1	1	-	-	-
4325446	TGCAGCAGCCTGGCGCTCACCCGTCCCTGCTTCCTCACCATCTCCACCACCTCTCCGCGCACGGGCTCC	1	1	0	1	-	1	1	1	1	1	1	1	1	1	1	1	1	1	1	1	1	1	1	1	-	1	1	-	1	1	-	1	1	1	1	1	1	1	1	1	1	1	1	-	1	1	-	0
4265074	TGCAGCAGCGGCAGCATGTTTGCATGCTCGTAGAAACGTGCGCGCGCCTCTCCGTCCGTCCGTCCCGCA	1	1	1	1	1	1	1	1	1	1	1	1	1	1	1	1	1	1	1	1	1	1	1	1	1	1	1	1	-	1	-	1	1	1	1	-	1	1	1	1	1	1	1	1	1	1	0	1
4286908	TGCAGATTGAGGAGCACGGCGATCATGCTCTTCTTGTCGCCTTCGGTGCCGAGATCGGAAGAGCGGTTC	1	-	1	1	1	1	-	1	1	1	1	1	1	1	1	1	1	1	-	1	-	1	1	1	0	1	1	1	1	1	1	-	1	1	-	1	1	1	1	1	1	-	1	1	1	1	1	1
4290993	TGCAGGAAGAGGACGAGGCGCCATGGACGTGAGGCGACGGGACGACGATGATGGATGCGACCCGCGGCT	1	1	1	1	1	1	1	0	0	1	1	1	1	1	1	1	1	1	-	1	1	1	1	1	1	1	1	1	1	1	1	1	-	1	1	1	1	1	1	1	1	1	1	-	1	1	1	1
4290761	TGCAGCCACAGGCTTCTTGGCTTTGCGCTTAGGCGCTGCCTGGCCGAGATCGGAAGAGCGGTTCAGCAG	1	-	1	1	1	1	1	1	1	1	1	1	1	1	1	1	1	1	1	1	1	1	1	1	1	1	1	1	1	1	1	1	1	1	1	0	1	1	1	-	1	1	1	1	1	1	1	1
4276773	TGCAGGATAACCAATGATGCGTACGCGTATTCACCCGAGATCGGAAGAGCGGTTCAGCAGGAATGCCGA	1	-	1	1	1	1	1	1	-	1	1	-	1	1	1	1	1	1	-	-	1	1	1	1	1	-	1	1	1	1	1	1	1	-	1	1	1	-	1	-	1	1	1	1	1	0	0	1
4264374	TGCAGAAACTTGAAAATAGACATTACACGTTCAATTCAAGCGCCTTTGCGTTGGTTAAGTTGACCGAGA	1	-	1	1	-	1	1	-	1	1	1	-	1	1	1	1	-	1	1	1	1	1	1	1	1	1	1	1	1	1	1	1	1	1	1	1	1	-	1	1	1	1	1	1	-	-	0	-
4312293	TGCAGATCACCGTGTTCCTCTTCGTCCGGCTGCCCCGAGATCGGAAGAGCGGTTCAGCAGGAATGCCGA	-	-	1	1	1	1	1	-	1	1	1	1	1	-	1	1	1	1	1	1	1	1	1	1	1	1	-	1	1	1	0	1	1	1	1	-	1	1	1	-	1	1	-	1	1	1	1	1
4270293	TGCAGGGCCTGGGCGCGCCAGCCGACGCCTGCGCCTTGAGCCTGGAGATGAACTCCCGAGATCGGAAGA	1	-	1	1	1	-	1	1	1	1	1	1	1	-	1	1	-	1	0	1	-	1	1	1	1	0	-	-	1	1	1	1	1	1	1	1	1	1	1	-	1	1	1	1	1	1	1	1
4265327	TGCAGAGACTGTAGCTGCGCCTTGCCGCTGAGGCCGCACTGCCGAGATCGGAAGAGCGGTTCAGCAGGA	1	1	1	1	1	1	1	1	1	1	-	-	1	1	-	1	1	1	-	1	1	1	1	1	-	1	1	1	1	1	0	1	1	1	1	1	1	1	-	1	1	-	1	-	1	1	1	1
4293969	TGCAGCGCAACAGGCGTGGCGTCTGCGTCTGCACGCATGTCCCGAGATCGGAAGAGCGGTTCAGCAGGA	1	1	1	1	1	1	1	1	1	1	1	1	1	1	1	1	1	1	1	1	1	1	1	1	1	1	1	1	1	1	0	1	1	1	-	1	1	1	1	1	1	1	1	1	1	-	0	1
4270241	TGCAGGCGGTTGTCGAAGCTGGTGTCTGAAATTTGATCCCAGAACTCACGCAGCTCCGACTTGTTGATG	-	-	1	1	1	1	1	1	1	1	1	1	1	1	1	1	-	-	1	1	1	1	1	1	-	1	1	1	1	1	1	1	1	-	1	0	1	1	1	1	1	1	1	1	1	1	1	1
4263382	TGCAGATGGCCCACCACCACCGTGTACGTCGTTTCCCTCGTCGGCGCCGTGCTCCTCTACATTGTGCTG	1	1	1	1	-	1	1	0	1	1	-	1	1	1	1	1	1	1	1	1	1	1	-	1	1	1	1	1	1	1	1	1	1	1	1	-	1	1	1	1	1	1	1	1	1	1	-	1
4272255	TGCAGCTGCTGCGCGCAGGCCTCGCAGTGCATGTTGACGAGCAGCTCCACGGTGCGTGCCTCGCTGACG	1	1	1	1	-	1	1	1	1	1	1	1	1	1	1	1	-	1	0	1	1	1	1	-	1	0	1	1	1	1	-	1	1	1	-	1	1	1	1	1	1	1	1	1	1	1	1	1
4297436	TGCAGCTCGGGGACCCAACTGTCAGTGTGAATACTTGATACTCCGAGATCGGAAGAGCGGTTCAGCAGG	-	1	1	1	1	1	1	1	1	1	1	-	1	1	1	1	1	1	1	1	1	1	1	1	-	1	1	1	1	1	1	1	1	1	1	1	1	1	1	1	1	1	1	1	1	1	1	1
4300436	TGCAGCAATCAAGGTGGCCCCTGTTATGCCTAACTACTCTCCGTCCTCCGCGTCGGCCATTGTCGCCGA	1	-	1	1	-	1	1	1	1	1	1	1	1	1	1	1	1	1	0	1	1	1	1	1	1	1	1	1	1	1	1	-	1	1	1	1	1	1	1	1	1	1	1	1	1	0	1	-
4274400	TGCAGGGCCATCCAGTACGGCTCCAAGTTCATCAGCAACGGCCAGCCCGAGATCGGAAGAGCGGTTCAG	-	-	1	1	1	1	1	1	1	1	1	1	1	1	1	1	1	1	1	1	1	-	1	1	1	1	1	1	-	1	1	1	1	1	1	1	1	1	1	-	1	1	1	1	1	0	0	-
4290494	TGCAGGTACGCCGACGGCGTCGTCTTCGATCCCAGGCCGAGATCGGAAGAGCGGTTCAGCAGGAATGCC	-	1	-	1	0	1	-	1	1	1	1	1	-	-	1	1	1	1	1	1	1	1	1	1	1	1	-	-	1	-	1	1	-	1	1	1	1	0	1	1	1	1	1	1	1	0	1	1
4283275	TGCAGCTTCGGCTGCTACTTCACGCACAGCAAGGGGAGCTTCATATACTTCAAGCTGGAGTCGCTCCGA	1	-	1	1	1	1	1	1	1	1	1	1	1	1	1	1	1	1	-	1	1	1	1	1	1	1	1	1	1	1	1	1	1	1	1	-	1	1	1	1	1	1	1	1	1	-	1	1
4268978	TGCAGCTAGGAGAATTCTACTGTACGTGCAGCCCTTCCGTCGTCGGCGCACGATCATCCTCAGGCAACT	1	1	1	1	-	1	1	1	1	1	1	-	-	1	1	-	1	1	1	1	1	1	1	-	1	1	1	-	1	1	-	1	1	1	1	1	1	1	-	1	1	-	1	1	1	1	-	1
4270711	TGCAGGTCCCCATCGCCATCGGAGGTCCAGGGCTTGCGCCAGGGGCTACATTCCGAGATCGGAAGAGCG	1	-	1	1	-	1	1	1	1	1	1	-	1	1	1	1	1	1	0	1	1	1	1	1	1	1	1	1	1	1	1	-	1	1	1	1	1	1	1	-	1	-	-	1	-	1	1	1
4276570	TGCAGGTGAACTGAAAGGTCAACGACTCAGTGCAGCTTTGACCCGAGATCGGAAGAGCGGTTCAGCAGG	-	-	1	1	-	1	1	1	1	1	-	1	1	1	1	1	1	1	1	1	1	1	1	1	-	1	1	1	1	1	0	1	1	1	-	1	-	-	1	1	1	-	1	1	-	1	1	1
4297343	TGCAGAAGTTCGGCCGCGCGATGGGCGTGGGCCCGTCGGGCGCCGCCGCCGAGATCGGAAGAGCGGTTC	-	1	1	1	1	1	1	0	-	1	1	1	1	1	1	1	1	1	1	1	-	1	1	1	1	1	1	1	1	1	1	1	1	1	1	0	-	-	1	1	1	1	1	1	1	1	1	-
4278930	TGCAGCCCTGCGACGGCGTCGAACGCGCACGGGCCAGCCGCCTGCCCGTGCCCGAGATCGGAAGAGCGG	1	-	1	1	1	1	1	1	1	1	1	1	1	1	1	1	1	-	-	1	1	1	1	1	1	1	1	1	1	-	1	1	1	1	1	-	1	-	1	1	1	1	1	1	1	1	0	0
4326833	TGCAGTGGGCAGTGACAACTAGCGTGGACTTCTCGCTGGCGCAGCTGATCCAGGTGATCATCCTGCTCA	1	1	1	1	0	1	1	1	1	1	1	1	-	1	1	1	1	1	1	1	1	1	1	-	-	1	1	1	1	1	1	1	1	-	1	1	-	1	1	1	1	1	1	1	1	-	-	-
4291801	TGCAGTGGAAGTTCCGGGGCAACCAGTCCGTCACCTTCGGCCGAGATCGGAAGAGCGGTTCAGCAGGAA	-	1	1	-	1	1	1	1	1	1	-	1	1	1	1	1	1	1	1	-	1	1	1	1	1	1	1	1	1	1	1	1	1	1	0	1	1	1	1	1	1	1	1	1	1	1	1	1
4283718	TGCAGTTCAGCAGCTCGTCCTGGTTCTCGCGCACCCAGGCTTCCACCGAGATCGGAAGAGCGGTTCAGC	-	1	1	-	1	-	-	1	1	1	1	1	1	1	1	-	1	1	1	1	1	1	1	1	1	1	1	1	1	1	-	-	1	1	1	1	1	1	-	-	-	1	1	1	1	1	0	1
4296968	TGCAGAAAAAGCGGTGTACAACAGGATACATCAGGCAGAGTGCTGACCTTGCCATTGATGGAACACCGC	1	1	1	1	-	1	1	1	1	1	1	-	1	1	1	1	1	1	1	0	1	-	1	1	1	1	1	1	1	1	1	1	1	1	1	1	1	1	1	1	1	1	1	1	1	1	-	1
4275106	TGCAGGTTGGACGCGCCGTGCATCGCGAAGTACTCGCGCACCATCTCCCGAGATCGGAAGAGCGGTTCA	1	1	1	1	-	1	1	1	-	-	-	1	1	-	1	1	1	1	0	-	1	1	1	1	1	1	1	1	1	1	1	1	1	1	1	1	1	1	1	0	1	1	1	1	1	1	1	1
4266432	TGCAGACATGCATGGCCCATGCATGCATGCAATGCGTTGACGGAAGGTGGATAATATTCGGCCGAGATC	-	-	1	1	1	1	1	1	1	1	-	1	1	1	1	1	1	1	1	1	1	1	1	1	-	1	1	1	1	1	1	1	1	1	-	0	1	1	1	1	1	1	1	1	1	1	1	1
4309326	TGCAGCAGAGCAGCTGGAGCCCGAGCTTGAGCGGCGCCGAGATCGGAAGAGCGGTTCAGCAGGAATGCC	-	1	1	1	1	1	1	-	1	1	-	1	-	1	1	1	-	1	1	-	1	1	1	-	1	1	1	-	1	1	1	-	1	1	1	0	-	1	1	1	1	-	1	1	1	1	1	-
4271435	TGCAGTCCTGCGCGCCCCTGGCGGCGACCCCAAACCCGAGCGGCACGTCGGCCATGGACATGACGACGA	1	-	1	1	1	1	1	1	1	-	-	-	1	1	1	1	0	1	1	1	1	1	1	1	1	1	1	-	1	1	1	1	1	1	1	1	1	-	1	1	1	1	1	1	0	1	-	1
4304267	TGCAGCCGATGCCGATCCGATCTGGAGCCATACGGCCGAGATCGGAAGAGCGGTTCAGCAGGAATGCCG	1	1	1	1	1	1	1	0	1	1	-	1	1	1	1	1	-	1	1	-	1	1	1	1	1	1	1	1	1	1	-	1	1	1	1	1	1	1	1	1	1	1	1	1	-	1	1	1
4327986	TGCAGCAGGCAGGCACACTGGTCGTCCTCCGTACCAGTACTCGCTCGTTGCAGAGGACGCCGAGATCGG	-	1	1	1	-	1	1	1	1	1	1	-	1	1	1	1	-	1	-	1	1	1	1	-	1	1	1	1	1	1	1	1	1	1	1	1	1	-	1	-	1	1	1	1	1	1	1	1
4303099	TGCAGGATGTTGTAGAGCACCCAGCCGAGGGCGGGCGCCACCACGAAGAGCAGCAGCAGGCCCCTGTTG	1	1	1	1	1	1	1	1	1	1	1	1	1	1	1	1	1	1	1	1	1	1	1	1	1	1	1	1	1	1	-	1	1	1	1	1	1	1	1	1	1	1	1	1	1	-	1	1
4300174	TGCAGGCGACGTGCTCCGTTTCTGGGCGGCCCACTGTTAGGGAAGGCAAGTTTGAACTTCGACAGAACG	1	-	1	1	-	1	1	-	1	1	1	-	-	1	1	1	1	1	1	1	1	1	1	1	1	1	1	1	1	1	1	1	1	1	1	-	1	1	1	-	1	1	1	1	1	0	1	1
4278116	TGCAGGACAGCAGGACTAGTGTGTGGCGTGGTGGTGACCGAGATCGGAAGAGCGGTTCAGCAGGAATGC	-	1	1	1	1	1	1	-	1	-	1	-	1	1	1	1	-	1	-	-	1	1	1	1	1	-	1	1	1	1	1	1	1	1	1	0	-	1	1	-	1	1	1	1	1	1	1	1
4281279	TGCAGGAACTTGGTAAGGCACTGGAGCAAGCCGTATGCAAAAAGACCAGGAATCAACAACCGAGATCGG	1	-	1	1	1	1	1	1	1	1	-	1	1	1	1	1	1	1	1	-	1	1	1	1	1	1	1	1	1	1	0	1	1	1	1	1	1	1	1	-	1	1	1	1	1	1	-	1
4269249	TGCAGCAGCAGCGGCCCACTGGCACCACAGAGGCCTAGAAAAAGACACGGCGACGAGTCCCATTGTTAA	1	-	1	1	1	1	1	1	1	1	1	-	1	1	1	1	1	1	1	1	1	1	1	1	1	-	1	1	-	1	1	1	1	1	1	1	1	1	1	1	1	1	1	1	1	1	0	1
4273623	TGCAGCCGGGGCAGGAGGTAGTACTCCACCAGCTCCTCGTCCGTCGGCGCGAAGCGGAACCCCACCGAG	1	-	1	1	1	-	1	1	1	1	1	-	1	1	1	1	1	1	1	1	1	1	1	1	-	1	1	1	1	1	-	1	1	1	1	1	1	1	1	-	1	1	1	1	1	1	1	1
4276832	TGCAGTTGCGATGCCACGGTACAGACGGATCAAAGGTCCTCGGCGCCGAGATCGGAAGAGCGGTTCAGC	1	1	1	1	-	-	1	1	1	1	-	1	1	1	1	1	1	1	1	1	1	1	1	0	1	1	1	1	1	-	1	1	1	1	1	1	1	-	-	1	-	1	1	1	1	1	0	-
4267710	TGCAGCACATACATACACGATCGTGCTTGGGTTATCCGAGATCGGAAGAGCGGTTCAGCAGGAATGCCG	1	1	1	-	1	1	-	1	0	0	1	1	1	1	1	-	1	1	1	1	1	1	1	1	1	-	1	1	-	1	1	1	1	1	1	1	1	1	-	1	1	-	1	1	-	1	1	-
4263826	TGCAGGCGCTTCAGTTCAGCCTCGAGCTCTGCTTCCATTTGATCCAAGGCCGCGGCGGCATCTCCAACG	1	-	1	1	1	1	1	1	1	1	1	-	1	1	1	-	1	1	1	1	1	1	1	1	1	1	1	1	1	1	1	1	1	1	1	1	1	1	1	-	1	1	1	1	1	1	1	1
4291753	TGCAGCTAAGCCTCCGAGTGGGAGGTTTGCTCTCCACTCCGAGATCGGAAGAGCGGTTCAGCAGGAATG	1	1	-	-	1	1	1	1	-	-	1	1	1	-	-	1	1	1	1	1	-	1	1	1	1	1	1	1	1	1	1	1	1	1	1	1	1	1	1	1	1	1	1	1	1	1	1	1
4298598	TGCAGCGGGTAGGCTGATGATTGCAGCGACCACCAACCACCGAGATCGGAAGAGCGGTTCAGCAGGAAT	1	-	1	1	1	1	1	1	1	1	1	1	1	1	1	1	1	1	1	0	1	1	1	1	1	1	1	1	1	-	0	1	1	1	1	1	1	1	1	1	1	1	-	1	1	0	1	1
4286387	TGCAGAGGCAGCCCCTTGTACTCCATGACGGCCGCCACGTCGCGCGCCAGCGTGGAGCGGATGATGGCC	1	0	1	1	1	-	0	1	1	1	1	1	1	1	1	-	1	1	1	1	1	1	1	1	-	1	1	1	1	-	-	1	1	1	1	1	1	-	1	1	1	1	1	1	1	1	1	1
4267215	TGCAGGTGCAAAAAAACGCATCATCTTTCGCACAAACAACCCCCGAGATCGGAAGAGCGGTTCAGCAGG	1	0	1	1	-	1	1	1	1	1	1	-	1	1	1	1	1	1	1	0	1	1	1	1	1	1	1	1	1	1	1	-	1	1	-	1	1	1	1	1	1	1	1	1	1	1	1	1
4329095	TGCAGGCAGAAAACGTTGATGCCTTGCTTCACCGTTGGCCTGTTCTTTTTCCTGACGTGTCGCACTTGC	1	-	1	1	1	1	1	0	1	1	-	1	-	1	1	1	-	1	-	0	1	1	1	1	1	1	1	1	1	1	1	1	1	1	1	1	1	1	1	1	1	1	1	1	1	-	-	1
4326931	TGCAGTACAGCGTCAAGATCGGGCGCCCCTACACCCGAGATCGGAAGAGCGGTTCAGCAGGAATGCCGA	1	1	1	1	1	1	1	1	1	1	1	1	1	1	1	1	1	1	-	1	1	1	1	1	1	1	1	1	1	1	1	1	1	1	1	1	1	1	1	0	1	1	1	1	1	1	0	1
4325621	TGCAGGGATGGGCGATAGCTTGGACTACTTGGTTTGCTTGGAAGCACAAGAGCGCCCTAGGTACGAACT	1	1	1	1	1	1	1	1	1	1	1	1	1	1	1	1	1	1	-	1	1	1	1	1	-	1	1	1	1	1	0	1	-	1	1	1	1	1	1	1	1	1	1	1	1	1	1	1
4311238	TGCAGGAGAAGGAGTTGCCGGCGCCGTTGCTGCTGCCCGAGATCGGAAGAGCGGTTCAGCAGGAATGCC	1	1	1	-	1	1	-	1	-	-	1	1	1	1	1	1	1	0	1	1	1	1	1	1	-	1	1	-	1	1	-	1	1	1	1	1	1	1	1	1	-	1	1	1	1	1	1	1
4326033	TGCAGCCACGGCCCAAGGCGGAAGTAGAAACCGCGCCGAGATCGGAAGAGCGGTTCAGCAGGAATGCCG	1	1	1	-	1	1	1	1	1	1	1	1	1	1	1	1	1	1	1	-	1	1	1	1	1	1	1	1	1	-	1	1	1	1	1	-	1	-	1	1	1	1	1	1	1	1	1	-
4328414	TGCAGCCACCCCCGCGTCCATGGCCGCCGCCAGGGCTAGGCGCTACTCCGCCGCGAAGCTCCGAGATCG	1	1	1	1	1	1	1	1	1	1	-	1	1	1	1	1	1	1	0	-	1	1	1	1	1	-	1	1	1	1	1	-	0	1	1	0	1	1	1	-	1	1	1	1	1	1	1	1
4299124	TGCAGCGCCGAGGCTCAATTGCTGGAGGACGCCCTTATCCGAGATCGGAAGAGCGGTTCAGCAGGAATG	1	-	0	0	1	-	-	1	1	1	1	1	1	1	1	1	1	1	1	1	1	1	1	1	1	1	1	1	-	1	1	-	1	1	1	1	1	1	1	1	1	1	-	1	1	1	1	1
4280242	TGCAGCTGCATGGATCGTTTCAGAAGGCAGAAAGACCCGAGATCGGAAGAGCGGTTCAGCAGGAATGCC	1	1	1	1	-	1	-	-	0	1	0	-	1	1	1	1	1	1	1	0	1	1	1	1	1	1	1	1	1	1	1	1	1	1	1	1	1	1	1	1	1	1	1	-	1	1	1	1
4272710	TGCAGCAGCGGCCTCATCGTCCGTGGCAGAGACCACCGTCCCGAGATCGGAAGAGCGGTTCAGCAGGAA	1	-	-	1	-	1	1	1	1	-	1	1	1	-	1	1	1	1	-	0	1	1	1	1	1	1	1	1	1	1	1	-	1	1	1	1	1	1	0	1	1	1	1	1	1	1	0	1
4264511	TGCAGATGGAGATGGGCGCGTCACGGGCGCCGACGCCACCAAGTTCTTCGCCATGTCCGAGATCGGAAG	1	0	1	1	1	1	1	1	1	1	1	1	1	1	1	1	1	1	1	-	1	1	1	0	1	1	1	1	-	1	1	1	1	1	1	1	1	-	1	1	1	1	1	1	1	-	1	1
4292627	TGCAGCGCCAACTACCCACTGATGCAGAAGCTGCGCGCCGTGCTGGTCGACCACGCCCTGACCGCCGAG	-	1	1	1	1	1	1	1	1	1	1	1	1	1	1	1	1	1	-	1	1	1	1	1	1	1	1	1	1	-	-	1	1	1	1	1	1	1	1	1	1	1	1	1	1	0	-	1
4284385	TGCAGCTGGAGTCGAAGAATGTGTGCGTCGTGGGAGCCGGCATGGCCGAGATCGGAAGAGCGGTTCAGC	1	1	1	1	1	1	1	1	-	-	1	1	1	1	-	1	-	1	1	1	1	1	1	1	1	1	1	1	1	0	1	1	1	1	1	-	1	1	1	1	1	1	1	1	1	1	1	1
4272905	TGCAGAAGAGGGACAGGATCTTGTCCTGCGCGTTGAAGGCCGCCACGGTGCGGATGTTGCTCACGCCCT	-	1	1	1	0	1	1	1	1	1	1	1	-	1	1	1	1	1	1	1	1	1	1	1	-	1	1	1	1	1	1	1	1	1	1	1	1	1	1	-	1	1	1	1	1	1	1	-
4264263	TGCAGCTGCATCCATGCATGCTTTGTTGGGGGTGACGGCCGAGATCGGAAGAGCGGTTCAGCAGGAATG	1	-	1	1	-	1	-	1	1	1	-	1	1	1	1	1	1	1	1	1	1	1	1	1	1	1	1	1	-	1	0	1	1	1	0	1	1	1	1	-	1	1	1	1	1	-	1	1
4293071	TGCAGGGCCCGCCGCCGCATCGCCGCGGGCAGCACGAAGTAGAGCTGCCCGAGATCGGAAGAGCGGTTC	-	1	1	-	1	0	1	1	-	1	1	1	1	-	1	1	1	1	1	1	1	1	1	1	1	1	1	1	-	1	-	1	1	1	1	1	1	1	1	1	1	1	1	1	1	1	1	1
4272760	TGCAGGTCAAAATGACATACAGGCAGGACTGATTTCGTGGGTAAAGAACACGCAAACCCGAGATCGGAA	1	1	1	1	1	1	1	1	1	1	1	-	1	1	1	1	0	1	-	1	1	1	1	0	1	0	1	1	1	1	1	1	1	1	1	1	1	1	1	1	1	1	-	1	1	1	1	1
4294178	TGCAGCTAGCCAACTCGACGGTGCTACCGATGACGCTGCGGACAGCCATCGAGCTGGGCCTTCTGGAGG	1	-	1	1	1	1	1	1	1	1	1	1	1	1	1	0	1	1	1	1	1	1	1	-	1	1	1	1	1	1	-	1	0	1	1	1	1	-	1	1	1	1	-	1	1	1	1	1
4295946	TGCAGGGGCCTTTCCAGGACAGCCTCCGCGAGGCGCTGGAGGATGAGGAGGGGGCGCCGAGATCGGAAG	1	1	1	1	1	1	1	1	1	1	1	1	1	-	1	1	1	1	1	1	1	1	1	1	1	0	1	1	1	1	1	1	1	1	-	1	1	1	1	-	1	1	1	1	1	1	1	1
4294239	TGCAGGAGACGGCGCACCGCGCGGGGCTGAAGCTGCCGAGATCGGAAGAGCGGTTCAGCAGGAATGCCG	1	1	1	1	1	1	1	1	1	1	1	1	1	1	1	1	1	1	1	1	1	1	1	1	1	1	1	1	1	1	1	1	1	1	1	1	1	1	1	1	1	1	1	1	1	0	1	1
4288685	TGCAGGTTGTCGGCCAGCTCCTCGATGTCGAGGGCGATGCTCTTCTCAGACGGCGCCGAGATCGGAAGA	1	1	1	1	1	1	1	1	1	1	1	1	1	1	1	1	1	1	-	-	1	1	1	-	1	1	1	1	1	1	1	1	1	1	1	1	1	-	1	1	1	1	1	1	1	1	1	1
4291649	TGCAGCACCAGTTTTCTTGCCGGATGAGTCCGTACCTGAAGCTGACGACGACATGGTCCGAGATCGGAA	1	1	1	-	1	1	1	1	1	1	1	1	1	-	1	1	1	1	1	1	1	1	1	1	-	1	1	1	1	1	1	1	-	1	1	1	1	1	1	1	1	1	1	1	1	1	1	1
4286685	TGCAGCCCCTGGTACTGCGGAAGCTACAGAAGCTCCGAGATCGGAAGAGCGGTTCAGCAGGAATGCCGA	-	1	1	1	1	1	-	1	1	1	1	-	1	1	1	0	1	1	1	1	1	1	1	1	1	1	1	1	-	1	1	1	1	1	1	1	1	1	1	1	1	1	1	1	1	0	1	1
4291233	TGCAGCCATTTCGGGCCTCCTCGAACCACACCTTTTCAGGCCCGAGATCGGAAGAGCGGTTCAGCAGGA	-	1	1	1	1	1	-	1	1	1	-	1	-	1	1	1	1	1	1	1	1	-	1	1	1	1	1	1	-	1	1	1	1	1	1	-	1	1	-	-	1	1	1	1	1	1	1	-
4276919	TGCAGCATGCGCGTCATGAAACGGAAGGTGCCGTCGTCGATGTAGGGCGACAGACGGGCGCTCTCGATG	1	1	1	1	1	1	1	-	1	0	-	1	1	1	1	1	-	1	1	-	1	1	1	1	1	1	1	1	1	1	1	1	1	1	1	1	1	1	1	1	1	1	1	1	-	1	0	1
4279472	TGCAGCTCCTCGAGAAGAAGGAGGAGCATCCTTGCTCCGTCTCCCCGAGATCGGAAGAGCGGTTCAGCA	1	1	1	1	1	1	1	1	1	1	1	1	1	1	1	1	1	1	1	1	1	1	1	1	1	1	1	1	1	1	1	-	1	-	1	-	1	1	1	1	1	1	1	-	1	1	1	1
4272065	TGCAGATTCCGTGAAATTGGTCCGCTGTTGTCGGCGCTGTTAAATCCGAGATCGGAAGAGCGGTTCAGC	1	1	1	1	1	1	1	1	1	1	1	1	-	1	1	1	0	1	1	1	1	1	1	1	1	0	1	1	1	1	1	1	1	1	1	1	1	-	-	1	1	1	1	1	1	1	1	1
4285667	TGCAGCCACGCACGCAGCTTCCACAGCGGCACGCTCCCGAGATCGGAAGAGCGGTTCAGCAGGAATGCC	-	-	1	-	1	1	1	1	-	1	1	1	1	-	-	1	1	1	1	1	1	1	1	1	1	1	1	1	1	1	1	1	1	1	1	0	1	1	1	1	1	1	1	1	1	1	0	1
4267560	TGCAGGGGCAGGTAGTGCTGGTGACGGGCGCCTCCTCCGAGATCGGAAGAGCGGTTCAGCAGGAATGCC	-	1	1	-	1	1	1	1	1	1	1	1	1	1	-	-	1	1	1	1	1	1	1	1	1	1	1	1	1	0	-	1	-	1	1	-	1	1	1	-	1	1	1	1	1	1	1	1
4271605	TGCAGCTTCTGCTTCAGGGAGATCGCCGAGTTCGCGTTCAAGATGAGGGCGTACAGCCACGCGGACCGA	0	1	1	1	1	1	1	1	1	1	1	1	1	1	1	1	1	1	1	1	1	1	1	1	-	1	1	1	1	1	1	1	1	1	1	1	1	1	-	1	1	1	1	1	1	1	1	1
4327300	TGCAGACCTGGTTGGCAGGTCCGCAACATTCCAAGACCCAGATCGGTTTCGCGCATGCAGAGGGAGACA	1	-	1	1	1	1	1	1	1	1	1	1	1	1	1	-	1	-	0	1	1	-	1	1	1	1	-	1	1	1	0	1	1	-	1	1	1	1	1	1	1	1	1	1	-	1	-	1
4298315	TGCAGCCGGTTCGGGTCGCTGGAGCAGTTGGCGGCCAGCCTCCGAGATCGGAAGAGCGGTTCAGCAGGA	1	1	-	1	1	0	1	-	1	1	1	1	1	1	-	1	1	-	1	1	1	1	1	1	1	1	-	1	1	1	1	1	-	1	1	1	1	1	1	1	1	1	1	1	1	1	1	1
4281969	TGCAGCAGCAGGTTGTGGTGCATCCCTAGCTTGTTGATATCTTCCAGGCAACCGAGATCGGAAGAGCGG	1	1	1	1	-	1	1	1	1	1	1	1	1	1	1	1	1	1	1	-	1	1	-	1	1	1	-	1	-	1	1	1	-	-	1	1	1	1	1	1	1	1	0	1	1	-	-	1
4302517	TGCAGCTGTAAAAGGGAGGAGCTTTGGCACGTACCACATCAATGAATGCGCTCCTTCCGTGCTCCCAGC	1	1	1	1	1	1	1	1	1	1	1	1	1	1	1	1	1	1	1	1	1	1	1	-	1	1	1	-	1	1	0	1	1	1	1	1	1	1	1	1	1	1	1	1	1	1	1	1
4275347	TGCAGAGGTGCGTGCAAGTGAGGACGAGCAAGGTCCCGAGATCGGAAGAGCGGTTCAGCAGGAATGCCG	1	-	1	1	1	1	-	1	-	1	-	1	1	1	1	1	-	1	1	-	1	1	1	-	1	1	1	1	-	1	1	1	1	1	1	1	1	1	1	1	-	1	1	1	1	1	1	0
4303093	TGCAGCAGCGTCAGATTGTTTCGTCGATATCTCAATGCTCCGAGATCGGAAGAGCGGTTCAGCAGGAAT	-	1	1	1	1	1	1	1	1	1	1	1	1	1	-	1	1	1	1	-	1	1	1	1	1	1	1	1	1	0	1	1	1	1	-	1	1	1	1	1	-	1	1	-	1	1	1	1
4289996	TGCAGCACCTCATCATCCAGGCACTCGAGCTCAATCACCTGTTGCTGGGACGACGACGACCCACCCCGA	-	-	1	1	1	1	1	1	1	1	1	-	1	1	1	-	1	1	-	1	1	1	1	1	1	1	1	1	1	1	0	1	1	1	1	1	1	1	1	-	1	1	1	1	1	0	1	1
4263335	TGCAGCCACCGGCGTGGGCATGAATCCGCAGGCGCTACGTGTGTAGCTCCGAGATCGGAAGAGCGGTTC	1	-	1	1	1	1	1	1	1	1	1	1	1	1	1	1	1	1	-	1	1	1	1	1	1	1	-	1	1	1	0	1	1	1	1	1	1	1	1	1	1	1	1	1	1	1	1	0
4275498	TGCAGCCTCCTCGCGTTCTTTGTTGGCGGAATTTGTGCGATGCTTCAGAGGCCGAGATCGGAAGAGCGG	-	1	-	1	1	1	1	1	0	0	1	-	1	1	1	1	1	-	1	0	1	1	1	1	1	1	1	1	1	1	1	1	1	1	1	-	1	1	1	1	1	1	1	1	1	1	1	-
4267972	TGCAGCATCAGCGAAAAGCCCCTCTGGTTCCAAGTAGAAATTCTGTTCGATGCTGTTAGTAGCTCCGAC	1	-	1	1	1	1	1	1	1	1	1	1	1	0	1	-	1	1	1	1	1	1	-	1	-	1	1	1	1	1	1	1	1	1	1	1	1	1	1	1	1	1	1	1	1	0	1	1
4279212	TGCAGCACTGCCACGAGCGTAACATCCTGCACCGGGACATCAAGGGCTCGAACCTGCTGATCGACCGCG	1	-	1	1	1	1	1	1	1	1	1	1	1	1	1	1	1	-	0	1	1	-	1	1	1	1	1	-	1	1	1	1	1	-	1	1	1	1	1	1	1	-	1	1	1	1	0	-
4278301	TGCAGCTTATGCCGGCCCTCGGGAGTCTTGAAGTAAGTCTTGAGTCCAGGCGCGCCCCCGAGATCGGAA	1	-	1	1	-	1	1	1	1	1	1	1	1	1	1	1	-	1	-	1	1	1	1	-	1	1	1	1	1	1	-	-	1	1	1	1	1	1	1	1	1	1	1	1	1	0	1	1
4287138	TGCAGCCCTGAGGAAGTTGTCGTAGGGGCTTGACGCCGAGATCGGAAGAGCGGTTCAGCAGGAATGCCG	-	1	1	1	1	1	1	1	1	-	1	1	-	1	1	-	1	1	1	1	1	-	-	-	1	1	1	1	1	1	0	1	1	1	1	1	1	-	1	1	1	1	-	1	1	1	1	1
4294499	TGCAGAAAAGCAACAAGATCATGTTATCGTACATCGCAACCAGTCCCAGACCCGAGATCGGAAGAGCGG	1	1	1	1	1	1	1	1	1	1	1	1	-	1	1	1	1	1	1	1	1	1	1	1	1	1	1	1	1	1	-	1	1	1	-	-	1	1	1	1	1	1	1	1	1	1	1	1
4288038	TGCAGCGCGGCGTCCTCGGAGTTGAGCAGCGGCACGAGAAGCGGGACGGCGCCGAGATCGGAAGAGCGG	1	1	1	1	1	1	1	1	1	1	1	1	1	1	-	1	1	1	1	1	1	-	1	1	1	1	1	1	1	1	1	1	1	1	0	0	1	1	1	1	1	1	1	1	1	1	1	1
4298163	TGCAGCAGAGCAGCTGGAGCCCGAGCTTGAGCGGCGCTGGCTCCGAGATCGGAAGAGCGGTTCAGCAGG	1	1	1	1	-	1	1	1	1	1	1	1	1	1	-	1	1	1	1	1	1	1	1	1	1	-	1	1	1	1	1	1	1	1	1	1	1	1	1	1	1	1	1	1	1	1	1	1
4272567	TGCAGCTGCTCCACCAAGGTGAGGAGTAGTCTCCTTCAAGGAGTACTCCTCCGAGATCGGAAGAGCGGT	1	0	1	1	-	1	-	1	1	1	1	1	1	1	1	-	1	1	1	1	1	1	1	1	-	1	1	1	1	1	1	1	1	1	1	-	1	1	-	1	1	1	1	1	1	1	1	1
4293283	TGCAGCCCAGGTCCTTGTCTGAGGACGCTGCCTCGTCAACCGAGATCGGAAGAGCGGTTCAGCAGGAAT	1	-	1	1	1	1	1	1	-	0	-	1	1	-	1	1	1	1	1	1	1	1	-	1	-	-	1	1	1	1	1	1	1	1	1	0	1	1	0	1	1	1	1	-	1	1	1	1
4284402	TGCAGCTCGTCTCGCACGCATTACACAGCCGGTCCCGACAGCCGAGATCGGAAGAGCGGTTCAGCAGGA	-	0	1	1	1	1	1	-	-	1	-	1	1	1	1	1	1	1	1	1	1	1	1	1	1	1	-	-	1	1	1	0	1	1	1	1	1	-	1	1	1	1	1	-	1	1	0	1
4301001	TGCAGCAGGTTGAGCCTGGTCTCCCCAGGGATCTGCCTGGCGCCGAGATCGGAAGAGCGGTTCAGCAGG	1	1	1	1	-	1	1	0	1	1	1	1	1	1	1	1	1	-	1	-	1	1	1	1	1	1	1	1	1	1	0	1	1	1	1	1	1	1	1	1	1	1	1	1	1	1	-	1
4290497	TGCAGGGTTTGAACTTTCGAAAGCCGTGCCCGCGGTTATGTGGCAGATGGGAATTTGTTAATGTCCGAG	1	1	1	1	-	1	1	1	1	1	1	-	1	1	-	-	1	1	1	1	1	1	1	1	1	1	-	1	1	1	1	1	1	1	1	1	1	1	1	1	1	1	1	-	1	1	1	1
4327176	TGCAGCGGTGCGGCAAGAGCTGCCGCCTCCGGTGGATCAACTACCTCCGTCCGAGATCGGAAGAGCGGT	1	0	1	-	1	1	1	1	-	1	1	1	1	1	1	1	1	1	1	-	1	1	1	1	1	-	1	1	1	1	0	1	-	1	1	1	1	1	1	1	1	1	1	1	1	1	1	0
4327441	TGCAGGCCCACCACCGTCAGCACGTCCGCCACGCCCATCATCGCGTACTGCGGCACCAGCCACGCCCAG	1	1	1	1	1	1	1	1	1	1	-	1	-	1	1	1	1	1	1	1	1	1	1	-	1	-	1	-	1	1	-	1	1	1	1	1	1	1	1	1	1	1	0	-	-	0	1	1
4266262	TGCAGCAGCTCGGGCTCTTCCTGCATGCCATAAATGGCCCACAAAAAAGAAGAATCCTAGAACAAAATG	1	1	1	0	-	1	1	1	1	1	1	1	1	1	1	1	-	1	1	1	1	1	1	1	1	-	-	-	1	1	0	-	1	1	1	1	1	1	1	1	1	1	-	1	1	1	1	1
4265552	TGCAGAATGGACTGACGAAGAACAGGAGGATGAAAACTGGAATGCGCGGCGTGCCGAGATCGGAAGAGC	-	1	1	1	1	1	1	1	1	-	-	1	-	1	1	1	1	1	-	1	1	1	1	1	1	1	1	1	-	1	1	1	1	1	1	-	1	-	1	-	1	1	1	1	1	1	1	1
4284015	TGCAGAACCTTGGGCGGGCGCTCATCTTTGCGGCCGAGATTGGAAGAGCGGTTCAGCAGGAATGCCGAG	1	0	1	1	-	1	1	1	1	1	1	1	1	1	1	1	1	1	1	-	1	1	1	1	1	1	1	1	0	1	0	1	1	1	-	-	1	1	1	1	1	1	-	1	1	-	1	1
4281638	TGCAGTGGAACTACGGCGTCAGACAAATCGAACCTACCGAGATCGGAAGAGCGGTTCAGCAGGAATGCC	1	1	1	1	1	1	1	1	1	1	1	1	1	1	1	1	-	1	0	1	1	1	1	-	1	0	1	1	1	1	1	1	1	1	1	1	1	1	1	1	1	1	1	1	1	1	1	1
4281410	TGCAGGACGAGGTAACACGAATCGCCAACGGCAAGCCGAGATCGGAAGAGCGGTTCAGCAGGAATGCCG	-	-	-	1	1	1	-	0	1	1	1	1	1	1	1	1	-	1	1	1	1	1	1	1	1	0	1	1	-	1	1	1	1	1	1	1	1	1	1	1	1	1	1	-	1	-	1	-
4268124	TGCAGGTCAAGGGCCACGCCGAGATCAGAAGAGCGGTTCAGCAGGAATGCCGAGACCGATCTCGTATGC	1	1	0	1	1	1	1	1	0	0	0	1	1	-	1	1	1	1	1	1	1	1	1	1	1	1	1	1	1	1	-	-	1	1	1	-	1	1	1	1	1	1	1	1	1	-	1	1
4298068	TGCAGATGAAGCTGCTGGTGGACAGGCGGTCGCGCCGAGATCGGAAGAGCGGTTCAGCAGGAATGCCAA	-	1	1	1	1	1	1	1	-	1	1	1	1	-	1	1	1	1	1	-	1	1	1	1	1	1	1	1	1	1	1	1	1	1	1	1	1	1	1	1	1	1	1	0	1	1	1	-
4297978	TGCAGATGAAGCTGCCGGTGGACAGGCGGTCGCGCCGAGATCGGAAGAGCGGTTCAGCAGGAATGCCGA	-	1	1	1	1	1	1	1	-	1	1	1	1	-	1	1	1	1	1	-	1	1	1	1	1	1	1	1	1	1	1	1	1	1	1	1	1	1	1	1	1	1	1	0	1	1	1	-
4316460	TGCAGCATCGGGTTGAGGTGTCCCTGAAACGGCAGAGGGAACATCAGCACGCGCCGAGATCGGAAGAGC	-	1	1	1	1	1	0	-	1	1	1	-	1	1	1	1	1	1	1	-	1	1	1	1	1	1	1	1	1	1	1	-	1	1	1	1	1	1	1	1	1	1	-	1	1	1	1	1
4301630	TGCAGCCTTTAGCTGGCCCACACATCTTGACCCCTACGACCCGAGATCGGAAGAGCGGTTCAGCAGGAA	-	1	1	1	1	1	1	1	0	0	0	1	1	-	1	1	1	1	1	0	1	1	1	1	1	-	1	1	-	1	1	1	1	1	1	-	1	1	1	1	1	1	1	1	-	1	-	1
4278324	TGCAGGTACGGCATCTGCGCCACGTCCGAGATCTGAAGAGCGGTTCAGCAGGAATGCCGAGACCGATCT	-	1	-	1	-	1	1	1	0	0	-	1	1	1	1	1	1	-	1	0	1	1	1	1	1	1	-	1	1	1	1	1	1	1	1	1	-	1	1	1	1	1	1	1	1	0	-	1
4267252	TGCAGTTCCGTGGCGCGCTCCATGAGGCGGAGCGCTTGTCCGAGATCGGAAGAGCGGTTCAGCAGGAAT	1	-	0	1	-	1	1	1	1	1	1	1	1	1	1	1	-	1	1	1	1	1	1	1	1	0	1	1	1	1	1	1	1	1	1	1	1	1	1	1	1	1	1	1	1	1	-	1
4309260	TGCAGAGGAAGAGCCTAACGGAGCCGCGGACGAAGCGAGCAAGCTGCGAACGATTCGGGGCCCGAGATC	1	-	1	1	1	1	1	1	1	1	1	1	1	-	1	-	1	1	1	1	1	1	1	1	1	1	1	1	0	1	1	1	1	1	1	1	1	-	1	1	1	1	1	1	1	1	1	1
4300962	TGCAGCTACGGGGACGAAGAGGGGAAGCTCAATCTTGGGTACGATGCCATGGCGATGGCGAGCACCGAG	1	1	1	1	-	1	1	1	0	0	0	1	1	1	1	1	1	1	1	-	1	1	1	1	1	1	1	1	1	1	1	-	1	1	-	1	1	1	1	1	1	1	1	1	1	-	1	1
4297968	TGCAGCAGCTCGGCATCAGTGGGAACCTCGATCGCCGAGATCGGAAGAGCGGTTCAGCAGGAATGCCGG	1	-	1	-	1	1	1	0	1	1	0	-	1	1	1	1	-	1	1	0	1	1	1	1	1	1	-	1	1	-	-	1	1	1	1	1	1	1	1	1	1	1	1	-	1	1	1	-
4274392	TGCAGCAGCTCGGCATCAGTGGGAACCTCGATCACCGAGATCGGAAGAGCGGTTCAGCAGGAATGCCGA	1	-	1	-	1	1	1	0	1	1	0	-	1	1	1	1	-	1	1	0	1	1	1	1	1	1	-	1	1	-	-	1	1	1	1	1	1	1	1	1	1	1	1	-	1	1	1	-
4327177	TGCAGACAGATCGGCTCATCTGATCGACCTGAGAGCCGAGATCGGAAGAGCGGTTCAGCAGGAATGCCG	1	1	1	1	1	1	1	0	-	1	-	-	1	1	1	1	1	1	-	1	1	1	1	1	1	1	1	1	1	-	0	1	1	1	-	1	1	1	1	1	1	1	1	-	1	-	1	1
4280305	TGCAGGAGCGCAGAGAAGCCGAGATCGGAAGATCGGTTCAGCAGGAATGCCGAGACCGATCTCGTATGC	1	-	1	-	1	1	1	1	1	1	1	0	0	1	1	1	1	1	1	1	1	1	1	1	1	1	1	0	1	1	1	1	1	1	-	-	1	-	-	1	1	1	1	1	1	1	1	1
4327904	TGCAGCTGCCCTCCCTGGTGTAGATGTGGTCAAAAATCCCGTGCCGAGATCGGAAGAGCGGTTCAGCAG	1	-	1	1	-	1	1	1	1	1	0	1	1	1	1	1	-	1	1	0	1	1	1	1	1	1	1	-	1	1	0	1	1	1	1	1	1	1	1	1	1	1	1	1	1	1	-	1
4301956	TGCAGCTAGCCAGCTAGCGCTTGCACCATTTTGGGTCCGAGATCGGAAGAGCGGTTCAGCAGGAATGCC	-	-	1	0	1	1	1	1	1	1	1	-	1	1	1	1	-	1	1	0	1	1	1	1	1	1	1	1	1	-	1	1	1	1	1	-	1	1	1	1	1	1	1	1	1	1	1	1
4299714	TGCAGGTACGTGAGCATGTCGCCGAACGCGGCGGCGTCGCGGGCGAAGGCGCCCCAGATCGGAAGAGCG	1	1	1	1	1	1	1	1	0	0	0	1	1	1	1	1	1	1	-	-	1	1	1	-	1	1	1	1	1	1	1	1	1	1	1	1	1	1	1	1	1	1	1	1	1	1	1	1
4271465	TGCAGCGTCAGTCCGACCTCATTCCGTGTGCTCTCGCTGGAGACCCGAGATCGGAAGAGCGGTTCAGCA	1	1	1	1	1	1	1	1	1	1	1	1	1	1	1	1	1	1	1	-	1	1	1	1	-	1	1	-	1	-	-	1	1	1	1	1	1	0	1	1	1	1	1	1	1	0	1	0
4326712	TGCAGGTGTTTTCACCCTCTGCCTCCTCCTCTTGCCGAGATCGGAAGAGCGGTTCAGCAGGAATGCCGA	1	1	0	1	1	1	1	1	1	1	1	-	1	1	1	1	1	1	1	1	1	1	1	1	1	1	1	1	0	1	1	1	1	1	-	1	1	1	1	1	1	1	1	1	1	1	-	1
4320504	TGCAGCGACGTGTGGTTCAGGTACTCGCCGCCTCCGCGCAAGCCCACGCCCAAGAAGACGCGGAGGCCG	1	-	1	1	0	-	1	1	1	1	1	1	1	1	1	1	-	1	1	1	1	1	1	1	1	1	1	1	1	1	1	1	1	1	-	-	1	1	1	1	1	1	1	1	1	1	0	1
4287672	TGCAGCTTCCCAGCGTCGCCTATCGACGACGGTATCGCGCCGAGATCGGAAGAGCGGTTCAGCAGGAAT	1	1	1	1	1	1	1	1	1	1	1	1	1	1	1	1	1	1	0	-	1	1	1	1	1	1	1	1	1	1	1	1	1	1	1	1	1	1	1	1	1	1	1	1	1	-	1	1
4266133	TGCAGGGCGGTGTCGTTGCCCTTGAACGCCTCGTTGCCGACGGTGATGCAGGTGATGCGCGCACCGAGA	1	-	1	1	1	1	1	1	1	-	1	-	1	1	1	1	1	1	1	0	1	1	1	1	1	0	1	1	1	1	1	1	1	1	1	1	1	1	1	1	1	1	-	1	1	1	-	1
4283168	TGCAGGATGATGATGCCCAAGGAGTAGACGTCGGAGCGCGGCGTCAGCTCGCCGAGATCGGAAGAGCGG	1	1	1	1	1	1	1	1	1	1	1	1	1	-	1	1	1	1	1	1	1	1	1	-	1	1	1	1	1	1	1	-	1	1	1	1	1	0	0	1	1	1	1	1	1	1	1	1
4305249	TGCAGCCCCCACTGCCACACGTGCGCCACCTCGTGGTACAGCACCCCGTCCACCTGCTCCTTGAGGTTT	1	-	0	1	1	1	1	1	1	1	-	-	1	0	1	1	1	1	1	1	1	1	1	1	1	1	1	1	1	1	-	0	1	1	1	1	1	1	1	1	1	1	1	1	1	1	1	0
4286611	TGCAGCAGCGATTCCCCGTGGGGGACGGGACGATGGACCTGGTGCGGGCGGGGCACGCGGTGAACCCAG	1	1	1	1	1	1	1	1	1	1	1	1	1	1	1	1	1	1	1	1	1	1	1	1	1	1	1	1	1	1	1	1	1	1	1	1	1	1	1	1	1	1	1	1	1	1	1	1
4264926	TGCAGCATTTCCGCTCCTACTACCAAAAGGTAAACAGGAGTGCACCGAGATCGGAAGAGCGGTTCAGCA	-	-	1	1	-	1	1	1	1	1	1	1	1	1	1	1	-	1	1	1	1	1	1	-	1	0	1	1	1	1	1	1	1	1	0	1	1	1	1	1	1	1	1	1	1	1	-	-
4300603	TGCAGCTGCAAGCGATCCGTGAGCTCACCCTTGTCCGATAGAGGCGACCCTGCGCCGAGATCGGAAGAG	1	1	1	1	-	1	1	1	1	1	1	1	1	1	1	1	-	1	1	-	1	1	1	1	1	-	1	1	1	1	1	1	1	1	1	1	1	1	1	1	1	1	1	1	1	-	1	-
4265540	TGCAGGTGGACGAGCTGGAGGCGGAGGCGGCAGCGCTGCGTGCCCGAGATCGGAAGAGCGGTTCAGCAG	-	-	1	1	1	1	1	1	1	1	1	1	1	-	-	1	-	1	1	1	1	1	1	1	1	0	1	-	1	-	-	1	1	1	-	1	1	1	1	1	1	1	1	1	1	1	1	1
4270871	TGCAGCTCCGTCTCGAACTCCATGTCCATCCGCGGCGTGCACTCCTCCGAGATCGGAAGAGCGGTTCAG	1	-	1	1	1	1	1	1	1	1	1	0	1	1	1	1	1	1	-	1	1	1	1	1	1	1	-	1	1	1	1	-	1	1	1	0	1	1	1	1	-	1	1	1	1	1	1	1
4263193	TGCAGATTTCAGGTTTTAGCTCGGCTGGGTTCACCTGTGGGATCAGGCCGAGATCGGAAGAGCGGTTCA	1	1	1	1	-	1	1	1	1	1	1	1	1	1	1	1	-	1	-	1	1	1	1	1	1	0	1	1	1	1	-	-	1	1	1	1	1	1	1	1	1	1	1	1	-	-	1	1
4269786	TGCAGGAGTTCCCCAGCGAGTCCCTGGAGGTGCTGCGGGCGGCGGTGCGGAGCATGGTCGACGCCCCGA	1	1	1	1	1	1	1	1	0	0	0	1	1	1	1	1	1	1	1	0	1	1	1	1	1	1	1	1	1	1	-	1	1	1	1	1	1	1	1	-	1	1	-	1	1	1	-	1
4288592	TGCAGCACACTGAGAAAGAAAGAGATCGAGGGGTAACCTACAAACCGAGATCGGAAGAGCGGTTCAGCA	1	0	1	1	1	1	1	1	1	1	1	-	1	1	1	1	-	1	-	0	1	1	1	1	1	0	1	1	1	1	-	1	1	1	1	-	1	1	1	1	1	1	-	1	1	-	1	1
4283676	TGCAGAATGGCCACCTCAAAAGATGGAGATCCAGCCGAGATCGGAAGAGCGGTTCAGCAGGAATGCCGA	1	1	1	1	1	1	1	1	1	1	1	1	1	1	1	1	-	1	1	1	1	1	1	1	1	1	-	1	-	1	-	1	1	1	1	1	1	1	1	1	1	1	1	1	-	1	-	1
4298607	TGCAGGCGTCGCCGCCGCCGCCGCTGCGCGAGAGGTCTGCTCCGAGATCGGAAGAGCGGTTCAGCAGGA	-	1	1	1	1	1	1	1	1	1	1	1	1	1	1	1	1	1	1	1	1	1	1	1	1	1	1	1	1	1	1	1	1	1	1	1	1	0	1	1	1	-	1	-	-	1	1	1
4274527	TGCAGACTCCTTCATATCGATCAAGTTCGAGGACAACGGCAAGGCGACGTGGGTGGACAGCCAGCAGGC	1	1	1	1	1	1	1	1	1	1	1	-	1	1	1	1	1	1	-	1	1	1	1	-	1	1	1	1	1	1	1	-	1	1	1	1	1	1	1	1	1	1	1	1	1	1	1	1
4285549	TGCAGAATGCTAGGCTTTCCTGGAACATTTTCTTGGTCGATGAGGAGCCGAGATCGGAAGAGCGGTTCA	1	1	1	1	-	1	1	1	1	1	1	1	1	1	1	1	1	1	1	1	1	1	1	-	-	1	1	1	1	1	1	1	1	1	0	1	1	1	-	1	1	1	1	-	1	0	0	1
4277336	TGCAGGAAAGGCGGCAACGGAGGTTAGCGTCCGAGAGAGAAGGGCCGAGATCGGAAGAGCGGTTCAGCA	1	1	1	1	1	1	1	1	1	1	1	1	1	1	1	1	1	1	-	1	1	1	1	-	1	1	1	1	1	1	1	1	1	1	1	-	1	1	1	1	1	1	1	1	1	0	0	-
4325628	TGCAGTGCTTCCCCGTTGACAGGTTCTCGCAGGACTGGCCGAGATCGGAAGAGCGGTTCAGCAGGAATG	1	1	1	1	1	1	1	1	-	1	1	1	1	-	1	1	1	1	1	1	1	1	1	0	1	1	1	1	1	0	1	1	1	1	1	1	1	1	1	1	1	1	1	1	1	1	-	1
4303700	TGCAGCGAGCTGCGATGCCATGTGTGCATGCGTTTGGGAAAGTAGCTTGCAAACTACCGAGATCGGAAG	-	1	1	1	1	1	1	1	1	1	1	0	0	1	1	1	1	-	-	1	1	1	1	1	1	1	1	-	-	1	1	-	1	1	-	1	1	1	1	1	1	1	-	1	-	1	1	-
4272136	TGCAGGGTCGTCGTCGACAATGAGACGCGCGAGGACTGCTCGCTCGTCAAGGTTGACAGCGTGAACCGA	-	-	1	1	1	1	1	1	1	1	1	1	1	1	1	1	1	1	1	0	1	1	1	-	1	1	1	1	1	1	1	-	1	1	1	-	1	1	1	-	1	1	1	1	-	-	1	1
4325994	TGCAGCCAACTTCGCCTTGTTGGTGTGCTTCCTGCCGAGATCGGAAGAGCGGTTCAGCAGGAATGCCGA	1	1	1	-	1	1	1	1	1	1	1	1	-	1	1	1	1	1	1	1	1	1	-	1	1	1	1	-	1	1	-	-	1	1	1	1	1	0	0	-	1	1	1	1	-	1	0	1
4296680	TGCAGACAACAAACGAGGCGCGGTCAAACCACAGATCCGAGATCGGAAGAGCGGTTCAGCAGGAATGCC	1	1	1	1	1	1	1	0	0	0	1	1	1	1	1	1	1	1	-	1	1	-	1	-	1	1	1	1	1	1	1	1	1	1	1	1	1	1	1	1	1	1	1	-	1	-	1	1
4324138	TGCAGCAAGACGAGCAGCGGAACAGCGCGCCACCGCCGAGATCGGAAGAGCGGTTCAGCAGGAATGCCG	1	1	1	1	1	1	1	1	1	1	1	1	1	1	1	1	1	1	1	1	1	-	1	1	1	1	1	1	1	1	1	1	1	1	1	1	1	1	1	1	1	1	1	1	1	1	1	1
4285386	TGCAGTGCGGCAACTTCCGCTCCGTCATCCCCGTCGACCCCAAGGTGCTCCGCGTCGTTGTCCCCGAGA	1	-	1	1	-	1	1	1	1	1	1	1	1	1	1	1	1	1	1	1	1	1	-	1	1	1	1	1	1	1	0	1	-	1	1	1	1	-	1	1	1	1	1	1	1	1	0	1
4270297	TGCAGCCTGGAAAGTGGAATTGGGATCTCTGGATTTGGATTTCAGAATCAGGCGTGCCGAGATCGGAAG	1	1	1	1	1	-	1	0	1	1	1	1	1	1	1	1	1	1	1	1	1	1	1	1	-	1	1	1	1	1	1	1	1	1	1	1	1	1	1	1	-	1	1	1	-	1	1	1
4325393	TGCAGCCTCTTCAACCCGACCCCCTCGCTCTCCGCCATGATCGTCAACCGAGATCGGAAGAGCGGTTCA	1	-	1	1	1	1	1	1	1	1	1	-	1	1	1	1	-	1	1	1	1	1	1	-	1	0	1	-	1	1	1	0	1	-	1	-	1	-	1	1	1	1	1	1	1	1	1	1
4302471	TGCAGTCCAACGAAGCTCGGCTTAGCTCAGTTCACCAATCTAGTTCTTTTGGAGATACCGAGATCGGAA	1	-	1	1	1	1	-	1	1	1	1	1	1	1	1	1	1	1	1	1	1	1	1	1	1	1	1	1	1	-	0	1	1	1	1	1	1	-	1	1	1	1	1	1	1	1	1	1
4303056	TGCAGGAGACGGCAACGCTGCCGATCCCCGACGAGCTCGTGGCGGAGATCTTCCACCGAGATCGGAAGA	1	-	0	1	1	1	1	0	1	1	1	1	1	-	1	1	-	1	0	1	1	1	1	1	1	0	1	-	1	1	1	1	1	1	1	-	1	1	1	1	1	1	1	1	1	1	1	1
4296419	TGCAGTAGCAGAAGGCGGCGCTGTCCTTGTGCTTGCCGCCGAGATCGGAAGAGCGGTTCAGCAGGAATG	-	-	1	1	1	1	1	1	1	1	1	1	1	-	1	1	1	1	-	1	1	1	1	1	1	1	1	1	1	-	1	1	1	1	1	1	1	1	1	1	1	1	1	-	1	1	1	0
4296246	TGCAGAACTTCTCCAACATGCCGCTCCACCCGCACCCGAGATCGGAAGAGCGGTTCAGCAGGAATGCCG	1	1	1	1	1	1	1	1	1	1	1	1	1	1	1	1	1	1	1	1	1	1	1	1	1	1	1	1	1	-	1	1	1	1	1	-	1	0	1	-	1	0	1	0	1	1	1	1
4293784	TGCAGCGCGGTCTATTTTTGCACTAAATGGCAGTGACCACCGAGATCGGAAGAGCGGTTCAGCAGGAAT	1	1	1	1	1	1	1	1	1	1	1	1	1	1	-	1	-	-	1	1	1	1	1	-	1	-	1	1	1	1	-	1	1	-	1	1	1	1	1	1	1	0	1	1	1	1	0	1
4304597	TGCAGGAAGTCGCCGACGTTCACCACCAGCGACGCCTCCCCCATCGCCGAGATCGGAAGAGCGGTTCAG	1	1	0	1	1	1	1	1	1	1	1	-	-	1	1	1	1	1	-	1	1	1	1	1	1	1	1	-	1	1	-	1	-	1	1	0	1	1	1	1	1	1	0	-	1	1	1	0
4267737	TGCAGATCATGGACGCCGTCATCCAGGAGCACCGGGAGAGGAAAGCCGCCGAGATCGGAAGAGCGGTTC	1	-	1	1	1	1	1	1	1	1	1	1	1	1	1	1	-	1	1	1	1	1	1	1	1	1	1	1	1	1	1	1	1	1	-	1	1	1	-	1	1	-	-	1	-	0	0	-
4286203	TGCAGTATCTCGGACTCTATCGTCGTCACGCGCTCCAGGACCTCCGAGATCGGAAGAGCGGTTCAGCAG	1	1	1	1	1	1	1	1	1	1	1	1	1	1	1	1	1	1	-	0	1	1	1	1	1	1	1	1	1	1	1	1	1	1	1	1	1	1	1	1	1	1	1	-	1	1	1	1
4289333	TGCAGGCAAGAAACGCTTTATATGCTTCGAGACCAAGGAAAAACTCCTCTCCTGCTGCCGATTCCTTCT	1	-	1	0	1	1	1	1	1	1	1	1	1	1	0	1	1	1	1	1	1	1	1	-	1	1	1	1	1	1	1	1	1	1	1	-	0	1	1	1	-	1	1	1	1	1	1	1
4311894	TGCAGGAGGTCGTCTCCGTCTCCGCCCAGGGCGAGGCCCCGAGATCGGAAGAGCGGTTCAGCAGGAATG	1	1	1	1	1	1	0	1	1	1	1	1	1	1	1	1	1	1	1	1	1	1	1	1	1	1	1	1	1	-	1	1	1	1	1	1	1	1	1	1	1	0	1	1	1	1	1	1
4297911	TGCAGAAAGGTGTATGCGAGACGGGGCCTATGTAAGGGACACCGCAAAAGTTAATGGGCGGCAAGGGAG	1	1	0	1	1	1	1	1	1	1	1	1	1	1	1	1	1	1	1	1	1	1	1	1	1	1	1	1	1	1	1	1	1	1	-	1	1	1	1	1	1	1	1	1	1	1	1	0
4287110	TGCAGACAAAATACACGACGACAGTATGAGACAGACGCAGCAACAACACTACTACTACGAGGCTACATG	1	1	1	1	-	1	1	1	1	1	1	1	-	1	1	1	1	1	0	1	1	1	1	1	1	1	1	1	1	1	-	-	-	1	-	-	1	1	1	1	1	1	1	1	1	1	-	1
4296039	TGCAGCGCCTCGACCTCTCCGCGATGCCCGCGCTCCAGGTGCTCGACCTCTACGACAATGACCTCGCCG	1	-	-	1	1	1	1	1	1	1	1	1	1	1	1	1	1	-	1	1	1	1	1	1	-	1	1	1	1	1	1	1	-	1	1	1	1	1	1	1	1	1	-	1	1	1	0	1
4266329	TGCAGCGTACGCGGCCGCTGCCGCTGGCCACCACCCGCTCCGAGATCGGAAGAGCGGTTCAGCAGGAAT	1	1	1	1	1	1	1	1	1	-	1	1	1	1	1	1	1	1	-	0	1	-	1	-	1	1	1	-	1	1	-	1	1	1	1	1	1	1	1	1	1	1	1	1	1	1	1	1
4296009	TGCAGTCTATCTGCTTTGGCTGCGTTACTGCGGCCTCGGTCCCGTGCGTACCGAGATCGGAAGAGCGGT	1	1	1	1	1	1	1	1	1	1	1	0	1	1	1	1	1	-	-	1	1	1	1	1	1	1	1	1	1	1	1	-	1	1	1	1	1	1	1	1	1	1	1	1	1	-	1	1
4271463	TGCAGGGTTGGTCGTCGGGGAGGCCGTCGGGAATAGAAAGCAAGCGGAGGCCCGAGATCGGAAGAGCGG	1	1	1	1	1	1	1	1	1	1	1	1	1	1	1	1	1	1	1	-	1	1	1	1	-	1	1	1	-	1	-	1	1	1	1	1	1	1	1	1	1	1	1	1	1	0	1	0
4278241	TGCAGTTTCTCCTCGTAATCTCGAGTAGATCAACGGGAGGTGGACGCTTGTTCCTGCGGAATTCGGGGC	-	1	1	1	1	1	1	1	-	1	1	1	1	-	1	1	1	1	1	1	1	1	1	1	1	1	1	-	1	1	1	1	1	1	1	1	1	1	1	1	1	1	1	1	1	1	1	1
4285846	TGCAGCGTTTTGACTACATAACCACGGATTAAGGACGAACCGAGATCGGAAGAGCGGTTCAGCAGGAAT	-	-	1	1	1	1	1	0	1	1	1	1	1	1	1	1	-	1	-	1	1	1	1	1	1	1	1	1	1	1	1	1	1	1	1	1	1	1	1	1	1	1	1	1	1	-	-	0
4313693	TGCAGGGCAGGAGCTGCGCAGAGCGCCACGAGCAACCGAGATCGGAAGAGCGGTTCAGCAGGAATGCCG	1	-	0	1	1	1	1	1	0	-	-	1	1	1	1	1	1	1	1	1	1	1	1	1	1	1	1	1	1	1	-	1	1	1	1	1	1	0	1	1	1	1	1	1	1	1	1	1
4265472	TGCAGCAACCAAGAGTGAGCTCTGCTGCGTAGCTTTGGCAGCTTTCATCTCCGAGATCGGAAGAGCGGT	-	1	1	1	1	1	1	1	0	1	1	1	0	1	1	1	1	1	-	1	1	1	1	1	1	1	1	1	1	1	-	-	1	1	0	-	1	1	1	1	1	1	1	1	1	1	-	-
4294790	TGCAGCAGCTTCACGCACCACTGATGACAGTATGCAGCACGGCAAACACATGCGCATCCGAGATCGGAA	1	-	1	1	1	-	1	0	1	1	1	-	1	1	1	1	1	1	1	0	1	1	1	1	1	1	1	1	1	1	1	1	-	1	1	1	1	1	1	1	1	1	1	1	1	1	1	-
4294444	TGCAGGACATGCGAGACACCTTGGTGGACCTGGAGCAGTCCGTGCTCGACGTCACCGAGATCGGAAGAG	1	1	1	1	1	1	1	-	1	1	1	1	1	1	1	1	1	1	1	0	1	1	1	1	1	1	1	1	1	1	1	1	1	1	1	1	1	1	1	-	1	1	1	1	1	0	1	1
4303021	TGCAGGATCGTCATGTCGTACGCACGTACGCATCGCCCACCGACGGCCGAGATCGGAAGAGCGGTTCAG	1	1	1	1	1	1	1	1	1	1	-	0	1	1	1	-	1	1	-	1	1	1	1	1	1	-	1	1	1	1	1	1	1	1	-	1	1	1	0	1	1	1	1	1	1	1	0	1
4294626	TGCAGCAATCCGTAAGCGAACAGTGATGGAATCATCCACCGAGATCGGAAGAGCGGTTCAGCAGGAATG	1	1	1	1	1	-	1	1	0	0	0	-	1	1	1	1	1	1	1	1	1	1	1	-	1	1	1	1	1	1	1	1	1	1	1	1	1	-	0	1	1	1	1	1	-	-	1	1
4275039	TGCAGAGTTCAGTCGCAAAACCACACCAACGCCACCTTCAGTTCTCCGAGATCGGAAGAGCGGTTCAGC	1	1	1	1	1	1	1	1	1	1	1	1	1	1	1	1	1	1	0	1	1	-	1	1	1	1	1	1	-	0	1	1	1	1	1	1	1	1	1	1	1	1	1	1	1	-	1	1
4265370	TGCAGCGAGGCAGGAGGACGAAGAGAGCTGCACATGTCGACGGCGATGCAGGATCCGAGATCGGAAGAG	-	1	1	1	1	1	1	1	1	1	1	1	1	1	1	1	1	1	1	1	1	1	1	1	1	1	1	1	1	1	0	1	1	1	-	1	1	1	1	1	1	1	1	-	-	1	1	1
4282860	TGCAGATATATACTCACCTTTGGTTGATTTGGCGCAACCACCGAGATCGGAAGAGCGGTTCAGCAGGAA	1	1	1	1	1	1	1	1	1	1	1	-	1	1	1	1	1	-	1	1	1	1	1	1	1	1	1	-	1	1	0	1	1	1	1	0	1	1	1	1	1	1	1	1	-	1	-	-
4287306	TGCAGCCACGCGATGGTGAACAACATAAGCTTCAGCAACAACTAAACTTCATCCGAGATCGGAAGAGCG	1	-	-	1	1	1	-	0	1	1	1	1	1	-	1	1	1	1	1	1	1	1	1	1	1	1	1	1	1	1	0	1	1	1	1	1	1	1	1	1	1	-	1	1	1	1	-	1
4300429	TGCAGGGGCACGTAGGTGATGCCGGCCGTGGCATCCATGGTGGCGACCGAGATCGGAAGAGCGGTTCAG	1	-	1	1	-	1	1	1	1	1	1	1	1	1	1	1	1	1	1	1	1	1	1	1	-	1	1	1	1	1	1	-	1	-	1	0	1	1	1	1	1	1	1	1	1	1	1	1
4327066	TGCAGGGCCTGGCGTTCTGCCATCTCCCACGCCAGCTTCGACATGGCCCTCGCCAGACGCCCGAGATCG	-	1	1	1	-	1	1	1	1	1	1	-	0	1	1	1	1	1	1	-	1	1	1	1	1	1	1	-	1	1	1	1	0	1	1	0	1	1	1	1	1	1	1	1	1	-	1	1
4271987	TGCAGCAGCTGCATCGTGTAAGGGAAGTCGAAGCTGTCGCTCCGAGATCGGAAGAGCGGTTCAGCAGGA	1	-	1	1	-	1	1	-	1	1	-	1	1	1	1	1	1	1	-	-	1	1	1	1	1	0	1	0	1	-	1	1	1	1	1	1	1	1	1	1	1	1	1	1	-	1	1	1
4276838	TGCAGGTGTTCGTTGGTGGTGCTGTAGAGCGCCGACTGGTTGACCAGCGCCGCCGCATGCACGTGTTGG	-	1	1	1	1	1	1	-	1	1	-	-	1	1	1	1	1	1	1	1	1	1	1	1	1	1	1	1	1	1	0	1	1	1	1	1	1	1	1	1	1	0	1	-	1	-	-	1
4297206	TGCAGATCTCCGAGGACCGCCTCAGGTACAAACCAAGACCCGCGCCGAGATCGGAAGAGCGGTTCAGCA	-	1	1	1	0	1	1	1	1	1	1	1	1	1	1	1	1	1	1	1	1	1	1	1	1	1	1	1	-	-	0	1	1	1	1	-	1	1	1	1	1	1	1	1	1	1	1	1
4269491	TGCAGGGCGTCGGCGTCGGGGAAGTAGATGCGCATGCCGAGATCGGAAGAGCGGTTCAGCAGGAATGCC	1	-	1	1	1	1	1	1	1	1	1	0	1	1	1	1	-	1	1	1	1	1	1	1	1	1	1	1	1	1	0	1	1	1	1	-	1	1	1	1	1	1	-	1	1	1	1	1
4277828	TGCAGAGCAACCAACAAGACCAACCGACTAGGCTGAGTAACTTGTACGTATTTTTGCCGAGATCGGAAG	1	1	1	1	1	1	1	1	1	1	1	-	-	1	1	1	-	1	1	1	1	1	1	1	1	1	1	1	1	1	1	1	1	1	1	1	1	1	1	1	1	1	1	1	1	-	1	1
4327765	TGCAGGTACCTCAGATGAGACGGCCGCGGGTCGAGCGCCGAGCAAGCGCTGAGCAGCTCCACCGAGATC	1	1	1	1	-	1	1	1	1	1	1	-	1	1	1	1	-	1	-	1	1	1	1	1	-	0	1	1	1	1	1	-	1	1	1	1	1	1	1	1	1	1	1	1	1	-	1	1
4290592	TGCAGGTGGCCATGGCATGCGTCGCCACCGTGCCCGACGCGCGCCCGAGATCGGAAGAGCGGTTCAGCA	1	1	1	1	1	1	1	1	1	1	1	1	1	1	1	1	1	1	1	1	1	1	1	1	1	1	1	1	1	1	1	1	1	1	1	1	1	1	1	1	1	1	0	0	1	1	1	0
4268734	TGCAGCGCCACGCAAAACGTCCCCGACGCCAGCGACCGCCTCCCGCCGCCTCCACCGAGATCGGAAGAG	1	1	1	1	1	-	1	1	-	1	1	1	1	-	-	1	1	1	1	1	-	1	1	-	1	1	1	1	1	1	-	1	1	1	1	1	1	1	1	1	1	1	1	1	1	1	1	1
4301061	TGCAGCCATCTCCTTGTTGTTCTAGCCCCCCGTCCCCATGCCGCCCTGCCCGAGATCGGAAGAGCGGTT	1	1	1	1	1	1	1	1	1	1	1	1	1	1	1	1	1	1	-	0	1	1	1	1	-	1	1	1	1	1	1	1	1	1	-	1	1	-	1	1	1	1	1	1	1	1	1	1
4327716	TGCAGAAAATCCAAAACAAACTATGCAGCATACTCGCTCTCGATCACCGAGATCGGAAGAGCGGTTCAG	1	1	1	1	-	1	1	1	1	1	1	-	1	1	1	1	1	1	1	1	1	1	1	-	1	1	1	0	1	1	-	1	1	1	1	1	1	1	1	1	1	1	1	1	1	1	-	1
4269793	TGCAGAACGGGAGCGGGGGCAGCGTCACCCCGACCGTCCAGTGGCCGAGATCGGAAGAGCGGTTCAGCA	-	1	1	1	1	1	1	1	1	1	1	1	1	1	1	1	1	1	1	1	1	1	1	-	1	1	1	1	1	1	0	-	-	1	1	1	1	1	-	1	1	1	1	1	1	-	1	1
4321393	TGCAGCAACCCACTGACCTGACCTGACCAGACCCAAATCCATCTTGGCTGCCGAGATCGGAAGAGCGGT	1	-	1	1	1	-	1	1	1	1	0	-	1	1	1	1	-	1	1	1	1	1	1	1	1	1	1	0	1	1	1	1	1	1	1	-	1	1	1	1	1	1	1	1	1	1	1	-
4327404	TGCAGTGGTTTCCCTGTTTGGCTCAAGTATGTCCCCGAGATCGGAAGAGCGGTTCAGCAGGAATGCCGA	1	-	1	1	1	1	1	1	1	1	1	1	1	1	1	-	1	1	1	-	1	1	1	1	1	1	1	1	-	1	1	1	1	1	-	0	1	1	1	1	-	1	1	1	1	1	1	1
4266166	TGCAGCAATCAGAATTATACAGCGTAAAAGATGGGGGCTCACTATAATGTCTCCGAGATCGGAAGAGCG	1	1	1	1	1	1	1	1	1	1	1	1	1	1	1	1	-	1	1	1	1	1	1	-	1	1	1	1	1	1	1	1	1	1	-	0	1	1	1	1	1	1	1	1	1	1	-	1
4296026	TGCAGCTTGGTTGTCATACTTAGAGTTTTGGACACCTGTTGTTGTGCCGAGATCGGAAGAGCGGTTCAG	1	-	1	1	-	1	1	1	1	1	1	1	1	1	1	1	1	1	1	1	1	1	1	1	1	1	1	1	-	1	1	0	1	1	1	-	-	1	-	1	1	0	0	1	-	1	-	1
4263927	TGCAGGATCACCACAGCTGGGCCTGGTCAATGAAGCACCGAGATCGGAAGAGCGGTTCAGCAGGAATGC	1	1	1	1	1	1	1	1	1	1	1	1	1	1	1	-	1	1	1	-	1	1	1	1	1	1	1	1	1	1	-	1	1	1	-	1	-	-	1	1	1	-	1	1	1	1	1	1
4270403	TGCAGGTTATCATGCACCTCTTCCTCTCGCTATCATCGCCTTCGTGCTCCCGAGATCGGAAGAGCGGTT	1	1	1	1	1	1	1	1	1	1	-	1	1	1	1	1	1	1	-	1	1	1	1	1	1	1	1	1	1	1	1	-	1	1	-	1	1	1	0	1	1	1	1	1	1	1	0	1
4292507	TGCAGGAAGTCGCCCACGTTCACCACCAGCGCCCCCGCCACCGAGATCGGAAGAGCGGTTCAGCAGGAA	1	1	1	1	1	1	1	1	1	1	1	1	1	-	1	1	1	1	1	1	0	1	1	1	1	1	1	1	1	1	1	1	1	1	1	1	1	-	1	1	1	1	0	-	1	-	-	1
4268937	TGCAGTACATCATGGCGAACCTGGTGAAACGCCCACACATGCAAGAGGCCGTCCAGTTCATCCTGGTGG	1	-	1	1	1	1	1	1	-	0	0	1	-	1	1	1	1	1	1	-	1	1	1	1	1	1	1	1	1	1	1	1	-	1	1	-	1	1	0	1	1	1	1	1	1	0	1	1
4265423	TGCAGCGCGCCGAGGCGGTCGGCGATGGGCGCGAAGTAGGGCAGCAGGGTGCTCCGAGATCGGAAGAGC	1	1	1	-	1	-	1	0	-	0	0	1	1	1	-	1	1	1	1	0	1	1	1	1	1	1	1	1	1	-	1	1	1	1	1	1	1	1	1	1	1	1	1	1	1	1	1	1
4285659	TGCAGGCAAGCTGAGCCCCGACGGCGCGGCGACCCCCGCCGAGATCGGAAGAGCGGTTCAGCAGGAATG	1	1	1	1	1	1	1	1	1	1	-	1	1	1	1	1	1	1	1	-	1	1	1	-	1	1	1	1	1	1	1	1	1	1	0	0	1	1	1	1	1	1	1	1	1	1	1	-
4327778	TGCAGGAAGTCGAACAGCTCGCGCTTCTTGCCGTCGCGCTCCGAGATCGGAAGAGCGGTTCAGCAGGAA	1	-	1	1	1	1	1	1	1	1	1	1	0	1	1	1	1	1	1	1	1	1	1	1	1	1	1	1	1	1	1	1	1	1	1	1	1	-	1	1	1	1	1	1	1	1	1	1
4303603	TGCAGCGTGCGGCGTGCTCGTCGGAGGCACTGTGATTGGGATCGTCTTCCTCCTCTTCAAGACCGAGAT	1	-	1	1	1	1	1	1	1	1	1	1	1	1	1	1	1	1	1	1	1	1	1	1	1	1	1	1	1	1	1	1	1	1	-	1	1	-	1	1	1	1	1	1	-	1	1	-
4272582	TGCAGTACAGGTGGCACCTCCCCGAGGACCACGCCAAGTACTCGGTGTTCATCCCGAGATCGGAAGAGC	-	-	1	1	1	1	1	1	1	1	-	1	1	-	1	1	-	1	1	-	1	1	1	1	1	1	1	1	1	1	0	1	1	1	1	-	1	1	1	1	1	1	1	1	1	1	0	1
4302883	TGCAGCTCGTTCTTGGCCACGGGGATGACGTGGGAAGCCAGGGTGACATCCGTGACGATGGCTGACGCG	-	1	1	1	1	1	1	1	0	0	0	1	1	1	1	1	1	1	-	1	1	1	1	1	1	1	1	1	1	1	1	1	1	1	1	1	1	1	1	1	1	-	1	1	1	1	1	1
4300594	TGCAGAAACACAGACACAGACGCCGATCCGCGTGAGCCAAAACAGTTCAAGGACCGAGATCGGAAGAGC	1	-	1	1	1	1	1	0	1	1	1	1	1	1	1	1	1	1	1	-	1	1	1	1	-	1	1	1	1	0	1	-	1	1	1	1	1	1	-	1	1	1	1	1	1	1	-	1
4293648	TGCAGCGCCACCCACTTCCAGGAGGACCTCTTCACTTTGCTCTGCCGAGATCGGAAGAGCGGTTCAGCA	1	1	1	1	1	1	1	-	1	1	1	1	1	1	1	1	1	1	1	1	1	1	1	0	1	1	1	1	1	-	0	1	1	1	-	0	1	1	1	1	1	1	1	-	1	1	1	-
4302507	TGCAGCTCGGCCGCACGCGCCGCTGCGACCAGGAGATGGCGCCCACGCCGCCGAGATCGGAAGAGCGGT	1	1	1	1	1	1	1	1	0	0	0	1	1	1	1	1	1	1	1	0	1	1	1	1	1	1	1	1	1	1	-	1	1	1	1	-	1	1	1	1	1	1	1	1	1	1	1	1
4289729	TGCAGAAGGTGTTTGTTCCTTGCAGCCTGCCCAGAACCTCCACCTGAGGCCGAGATCGGAAGAGCGGTT	-	-	1	1	0	1	1	1	1	1	1	1	1	1	1	1	1	1	1	1	1	-	-	1	1	1	1	1	1	-	1	1	1	1	1	1	1	1	1	-	1	-	1	1	1	1	1	1
4281575	TGCAGCCGCGCGTGTAAGGGTTGGCCACCGCAGAAGGCCGAGATCGGAAGAGCGGTTCAGCAGGAATGC	1	1	1	1	1	1	1	1	1	1	1	1	1	1	1	1	-	1	1	0	1	1	1	1	1	0	1	1	1	1	1	1	1	1	1	1	1	1	1	1	1	1	1	1	1	0	1	-
4273608	TGCAGGGCGGCGGGCACCCTGAAGAAGACTACATCCCCGAGATCGGAAGAGCGGTTCAGCAGGAATGCC	1	-	1	1	1	1	1	1	1	1	0	-	1	1	1	1	1	1	1	-	-	1	1	1	1	1	1	1	1	1	1	1	1	1	1	1	1	1	1	-	-	1	1	0	1	1	0	1
4288988	TGCAGTGATAGTATTTTCTTCTGCCTGATTTTTACCGAGATCGGAAGAGCGGTTCAGCAGGAATGCCGA	1	1	1	1	1	1	1	0	1	1	1	1	-	1	1	1	-	1	-	1	1	1	1	1	1	-	1	1	1	1	1	1	1	1	1	1	1	1	1	1	1	1	1	1	1	1	1	1
4290225	TGCAGAAGAAGTGATGGGGATACGTACCAGCCCACCACATGGCAGATAAGGTTCAGCCTCGACGCCGTC	1	-	1	1	-	1	1	1	1	1	-	1	1	1	1	-	1	1	0	1	1	1	1	0	1	1	1	1	1	0	1	1	1	1	1	1	-	1	1	1	1	1	1	1	1	1	1	1
4275843	TGCAGCAATTTACTCCTGTAGAATCTGCTTTTCGTTGCAAAAGGGGCAAACGGATTTATTCACAAGGTT	1	-	1	1	1	1	1	-	1	1	-	1	1	0	1	1	1	1	1	1	1	1	1	0	1	1	1	1	1	1	-	1	1	1	1	-	1	-	1	1	1	-	1	-	1	0	0	-
4264099	TGCAGTCATGCCAGCTGGTGTACTGCAAGCGAGTGACCAGCACCGAGATCGGAAGAGCGGTTCAGCAGG	-	1	1	1	1	1	1	1	1	1	1	1	1	1	1	-	1	1	-	-	1	1	1	1	1	1	1	1	1	1	-	1	1	1	1	1	1	1	-	1	1	1	1	1	1	1	1	1
4300557	TGCAGCGCCGCCAGGCGCAACGCCACCGACTTCGCCTGCAAGAGCGCGGGCAGCCGAGATCGGAAGAGC	-	-	1	1	1	1	1	1	1	1	0	1	1	1	-	1	1	1	1	-	1	-	1	1	1	1	1	1	1	1	1	1	1	1	1	-	1	1	1	1	1	1	-	1	1	1	1	-
4283028	TGCAGGTGGCCCTTTTTGTTTGCTGGCCCGCATGTCAATTGCCGAGATCGGAAGAGCGGTTCAGCAGGA	1	1	1	1	1	1	1	1	1	1	-	1	1	1	1	1	1	1	1	-	1	1	1	1	1	1	1	1	1	1	1	1	1	1	1	1	1	1	1	1	1	-	1	1	1	1	1	1
4321704	TGCAGAATTACAGGCGTGTATGTATCAGTGCTGGGTAGGGCAGAGCACCGAGATCGGAAGAGCGGTTCA	1	1	1	1	1	-	1	1	1	1	-	-	1	1	1	1	1	1	1	1	1	1	1	1	1	1	1	-	1	1	1	1	1	1	1	1	1	1	1	1	1	1	1	1	1	1	0	-
4264177	TGCAGCTTCAGAGTGACCTCCTGCTTCACCTTGCCTCCGAGATCGGAAGAGCGGTTCAGCAGGAATGCC	1	-	1	-	-	1	-	1	1	1	1	1	1	1	1	-	1	1	1	1	1	1	1	1	1	1	1	1	-	1	1	1	1	1	1	1	1	1	1	-	1	1	1	1	1	0	1	-
4273028	TGCAGGACAGCTGCATTCACAAAAGCAAAAGAATCTGAATTCCATCAATATTTATTCTTGTCTCCCGAG	1	-	1	1	1	1	1	-	1	1	1	1	1	1	1	1	1	-	0	1	1	1	1	1	1	1	1	1	1	1	1	1	1	1	-	1	1	1	1	1	1	1	1	1	1	1	1	1
4265254	TGCAGTGGACGTGTCCAAGGAGATGGGGCTGCCAGCCTACCTCCTATTCAACCCGAGATCGGAAGAGCG	1	1	1	1	1	1	1	1	1	1	1	1	1	1	0	1	1	-	-	1	1	1	1	1	1	1	-	1	1	1	-	-	1	1	1	1	1	1	-	1	1	1	1	1	1	-	0	1
4266247	TGCAGGCCTTCGCCGCCCTCTCCGCCGTCCTCTACGCCGCCTCCATCCTCTCCCGAGATCGGAAGAGCG	1	-	1	1	1	1	1	1	1	1	1	1	-	1	1	1	1	1	-	-	1	1	1	-	1	1	1	0	1	1	-	1	1	1	-	1	1	1	1	1	1	1	1	1	1	1	-	1
4264491	TGCAGCCTGGTCCGAAGCCCCCGAGGTGAGGCGGCGCCGAGATCGGAAGAGCGGTTCAGCAGGAATGCC	-	-	1	1	1	1	1	1	1	1	1	1	1	1	-	1	1	1	1	1	1	1	1	1	1	0	1	1	1	1	1	1	1	1	1	1	1	1	1	1	1	1	1	1	1	1	0	1
4280007	TGCAGAACCTGGTAAACGCATCGCTCATGATCTTCCTGCCGAGATCGGAAGAGCGGTTCAGCAGGAATG	1	0	1	1	1	1	1	1	1	1	-	1	1	1	1	1	1	1	-	1	1	1	1	1	1	0	1	1	-	1	1	1	1	1	0	-	1	1	1	1	1	1	1	1	-	1	-	-
4267444	TGCAGATGGTGGTGTGTGTGACGGGAATCACAGAGTGGAGTGCAGTGTTTCGTCCTGGGCGATCCCGTG	1	1	1	1	1	1	1	1	1	1	1	1	1	1	1	1	1	1	-	1	1	1	1	-	1	1	1	1	-	1	1	1	1	1	1	1	1	-	1	1	1	1	1	1	1	0	1	1
4326542	TGCAGCTTGGAGACGATGGATGTGAGATGTAAGTTGCCATGGCAGTAGGAGATGAGGCGCGCGATCTGA	1	1	1	1	1	1	1	1	1	1	1	1	1	1	1	1	1	1	-	1	1	1	1	-	-	1	1	1	1	1	-	1	1	1	1	1	1	1	1	1	1	1	1	1	1	1	1	1
4294231	TGCAGGTTCGACGTGTCTGACGCCATCTGCATCAGGGCCGAGATCGGAAGAGCGGTTCAGCAGGAATGC	1	1	1	1	1	1	1	-	1	1	1	1	1	-	1	1	1	1	0	1	1	1	1	1	1	1	1	1	1	1	1	-	1	1	1	1	1	1	1	1	1	1	1	-	-	0	-	-
4287445	TGCAGCTTAATAAGATCAATCAAAACGACGATAGGCCACGCCGTGATTGGACATGGTGCTCTCGCGATG	1	1	1	1	1	1	1	-	1	1	1	0	-	1	1	1	1	1	-	1	-	1	1	1	1	1	1	1	1	1	0	1	-	1	1	1	1	-	1	1	1	1	1	1	1	1	1	1
4318370	TGCAGAGAAGCAGATGAAGTTGGAGACTGTTCCATGCCCGAGATCGGAAGAGCGGTTCAGCAGGAATGC	1	-	1	1	1	1	1	1	1	1	-	1	1	1	1	1	-	1	-	1	1	1	1	1	1	1	1	1	1	-	1	1	1	1	-	0	1	1	-	1	1	1	1	1	-	0	0	-
4289295	TGCAGAAGATAGAACAACATGAACAGTTTAGTCGCCCAAAATTACTATGTTTGCCGAGATCGGAAGAGC	1	1	1	1	1	1	1	1	1	1	1	1	1	1	1	1	1	1	1	1	1	1	1	1	1	1	-	1	1	1	1	1	1	1	1	0	-	1	-	-	1	1	1	1	1	1	0	-
4266847	TGCAGGGGATAACAACAGCAGCAGCAATAAGAAGCGCGGAACCCGAGATCGGAAGAGCGGTTCAGCAGG	1	-	-	-	-	1	1	-	1	1	1	1	-	1	1	-	1	1	1	1	-	1	-	1	-	1	1	1	1	1	1	1	1	1	1	1	1	1	0	-	1	1	1	1	1	1	0	1
4306704	TGCAGACTATCCGCGAGCTCTCGCCGAAGGCGTTCGTCATCGTGGAGCAGGGCGCCGAGATCGGAAGAG	1	1	0	1	-	1	1	1	1	1	1	1	1	1	1	1	1	1	1	1	1	1	1	1	1	1	1	1	-	1	1	1	1	1	1	1	1	1	1	1	1	1	1	1	1	1	1	-
4298779	TGCAGAAGCTCAGAGAGGTCGTCCTCAATGACGACGAAGCCCCCGCCGAGATCGGAAGAGCGGTTCAGC	1	1	1	1	1	1	1	-	-	-	-	-	1	-	-	1	1	1	1	1	1	1	-	1	1	1	1	1	0	1	1	1	1	1	1	1	1	1	1	1	1	-	1	1	1	1	1	1
4274828	TGCAGCGAAGCTCGTGGGGAACCCAAGGAACAGGACATGATCACCCAAACTCCGAGATCGGAAGAGCGG	1	-	1	1	-	1	1	1	1	-	1	1	1	1	1	1	1	1	1	1	1	1	1	1	1	1	1	1	-	1	1	1	1	1	1	1	1	1	1	1	1	1	-	1	-	0	-	1
4275208	TGCAGGAGGGTGAACTTGACATCGGTGGCTCCACACACCACCGAGATCGGAAGAGCGGTTCAGCAGGAA	1	1	1	1	1	1	1	-	1	1	1	1	1	1	-	1	1	1	-	1	1	-	1	-	1	1	1	1	1	-	1	1	1	1	-	1	1	0	1	1	1	1	1	-	1	1	1	1
4298420	TGCAGCTGGCGAGCGTGAGGATGCTGCCGTGGGCGAGGGCGCACCTGAACCCCACCGAGATCGGAAGAG	1	1	1	1	1	1	1	1	1	1	1	1	1	1	1	1	1	1	1	1	1	-	-	1	-	1	1	1	1	1	1	0	1	1	1	1	-	-	1	-	1	1	1	1	1	-	1	1
4291391	TGCAGGGATCGTCGGCAACATGGATTCAGATTTGTGGTATAACCGAGATCGGAAGAGCGGTTCAGCAGG	1	1	1	1	1	1	1	1	1	1	1	1	1	1	1	1	0	1	-	1	1	1	1	0	1	1	1	1	1	1	1	1	1	1	1	1	1	1	1	1	1	1	1	1	1	-	0	1
4304846	TGCAGCAGCAGGTGCCCCCGTTGCAGGGGATGCGGCCACGCCGAGATCGGAAGAGCGGTTCAGCAGGAA	1	-	1	1	1	1	1	-	0	0	1	1	1	1	1	1	1	1	0	1	1	1	1	-	1	1	1	-	1	1	1	-	1	1	1	1	1	1	1	1	1	-	1	1	-	0	1	-
4290804	TGCAGCGCGCCCTGCCAGGGGCCGAGCTCGGGGTGGAACGCCACCACGTCCTCCACCCACCGAGATCGG	1	1	1	1	1	1	1	1	1	1	1	1	1	1	1	1	1	1	1	1	1	1	1	1	1	1	1	1	1	1	-	1	1	1	-	1	1	1	1	1	1	1	-	1	1	-	1	1
4314282	TGCAGCGACTACTCGGAGTGAAGGTGGAGCGAAGCAGCCGAGATCGGAAGAGCGGTTCAGCAGGAATGC	1	1	1	1	1	-	1	1	1	1	1	1	1	-	1	1	1	1	1	1	1	-	-	0	1	1	1	0	1	1	-	1	1	1	1	1	1	1	1	1	-	1	1	1	1	1	1	1
4312881	TGCAGCTCGTGAGCGGCACCGTCGGCGCCATCGACGCCGAGATCGGAAGAGCGGTTCAGCAGGAATGCC	1	1	-	-	1	1	1	0	1	1	1	1	1	-	1	1	1	1	1	0	1	1	1	-	1	1	1	1	1	1	1	1	1	1	1	1	1	1	1	-	-	1	1	-	1	1	1	1
4304780	TGCAGCGCCGCTGGCAGAAGTTGGGGACGCGGTCCATGCACTGGTACACGGCCGAGATCGGAAGAGCGG	1	1	-	1	1	1	1	0	1	1	1	1	-	1	1	1	1	1	1	0	1	1	1	-	1	1	1	1	1	1	0	1	1	1	-	1	1	1	1	1	1	1	1	1	1	1	1	1
4294977	TGCAGGTGATTGAGCATGTGGAGGAGGACCAAGCAAGTTTATTTGGCAACGTTGTATTGAGTTCATTCT	1	-	1	1	-	1	1	1	1	-	1	1	1	1	1	1	1	1	0	1	1	1	1	1	-	1	1	1	1	1	1	1	1	1	1	-	1	-	0	1	1	1	1	1	1	-	1	1
4276263	TGCAGCTCGGCAAGGTCAAAAGGAACATCGAAAGCCGAGATCGGAAGAGCGGTTCAGCAGGAATGCCGA	1	1	1	-	-	1	-	1	1	1	1	1	1	1	1	1	1	1	1	-	1	1	-	0	1	1	1	1	1	1	1	1	1	1	1	-	1	-	1	1	1	1	0	1	1	1	1	1
4303033	TGCAGCTAAGCCCCCGAGTGGGAGGATCGCTCACCACTCCGAGATCGGAAGAGCGGTTCAGCAGGAATG	1	1	-	-	1	1	1	1	-	-	1	1	1	-	-	1	1	1	1	1	-	1	1	1	1	-	1	1	1	1	1	1	1	1	1	1	1	1	1	1	1	1	1	1	1	1	1	1
4327701	TGCAGGACTCAAGCGTCTACAAAAGAGGTTTTCATGGCCGAGATCGGAAGAGCGGTTCAGCAGGAATGC	1	1	1	1	1	-	1	1	1	1	1	1	-	1	1	-	-	1	1	1	1	1	1	0	1	1	1	1	1	1	-	1	1	1	1	0	1	1	1	1	1	-	-	1	-	-	0	1
4285063	TGCAGAGGGAAGGCGTCGCTCCTGTCCTTGAGGCCTTGGCCATGGTCGCCGAGATCGGAAGAGCGGTTC	1	1	1	-	1	1	1	1	1	0	-	-	1	1	1	1	1	1	1	1	1	1	1	1	1	1	1	1	1	1	1	1	1	1	1	1	1	1	1	-	1	1	1	1	1	1	-	1
4276946	TGCAGATGATGGAGAAGGTGCAGAATACCGAGATTCCGAGATCGGAAGAGCGGTTCAGCAGGAATGCCG	1	1	1	1	1	1	-	1	1	-	-	1	1	1	1	1	-	1	1	1	1	1	1	1	1	1	1	1	1	1	1	1	1	1	1	1	1	1	1	1	1	1	1	1	1	-	1	1
4286162	TGCAGGTCCACCTCCTTGCCGGCGTCGGCGGCGCAGCCCCAGCCGAGATCGGAAGAGCGGTTCAGCAGG	1	1	1	1	1	1	1	1	1	1	1	1	1	1	1	1	1	-	1	1	1	1	1	1	1	1	1	0	-	1	1	1	1	1	1	1	1	1	1	1	1	1	1	1	1	1	1	1
4266800	TGCAGTCAATGCTTAGCATCAGAAAGGGAGAGGGAGAAAAGAACAAGGGCCGAGATCGGAAGAGCGGTT	1	0	1	1	1	-	1	1	1	1	-	-	1	1	1	1	1	1	1	1	1	1	1	1	1	1	1	1	1	1	1	1	1	1	1	1	1	1	1	1	1	1	1	1	1	1	-	1
4281520	TGCAGCTGCTCGAGCGCGGTCACCACCTCCGCCATGCCGGGGCGGGCCCGAGATCGGAAGAGCGGTTCA	1	1	1	1	1	1	1	1	-	1	1	1	-	-	1	1	1	1	1	-	1	1	1	1	1	1	1	1	1	1	-	0	-	1	1	0	1	1	1	1	1	-	1	1	1	0	1	1
4324227	TGCAGGGTGTCTCGTTCATACGTGTTGGATGGACCTTCACCCGAGATCGGAAGAGCGGTTCAGCAGGAA	1	1	1	1	0	-	1	1	1	1	-	1	1	1	1	1	-	1	1	1	1	1	1	1	1	1	1	1	1	1	-	1	1	1	1	1	1	1	1	1	1	1	1	1	-	1	-	-
4290630	TGCAGCACCGTGTCCTCGGCCTGTAGCAGTCAACCACCGAGATCGGAAGAGCGGTTCAGCAGGAATGCC	1	-	1	1	1	1	1	1	1	1	1	1	1	1	1	1	1	1	1	1	1	1	1	1	1	1	1	1	1	1	1	1	1	1	1	1	1	1	1	-	1	1	1	1	-	1	0	-
4303801	TGCAGGCCGCCTCCGTGGCCGCTCCGCCCGCTCAGCCGAGATCGGAAGAGCGGTTCAGCAGGAATGCCG	1	1	0	1	1	1	1	1	1	1	1	1	1	1	1	1	1	1	1	1	1	1	1	-	1	1	1	1	0	1	-	1	1	1	1	1	1	-	1	1	1	1	1	1	1	1	1	0
4269540	TGCAGTACAAGGTGTAGCAAATGGTCGACAACGACGATGTCGCCGATTGCTGCACCGAGATCGGAAGAG	1	1	1	1	1	1	1	1	1	1	1	1	1	1	1	1	1	1	1	1	1	1	1	1	-	1	1	1	1	1	1	1	1	1	1	0	1	1	1	-	1	1	1	1	1	1	-	1
4318081	TGCAGCCCGCACCCCCGCCGCCTACAATGCTCTCATGTCCGCCTACTCCCGCGCCGAGATCGGAAGAGC	1	1	1	1	1	1	1	1	1	1	-	1	1	1	1	1	1	1	1	1	1	1	1	1	1	1	-	1	1	1	-	1	1	1	1	1	1	1	1	1	1	1	1	1	1	-	0	1
4290488	TGCAGCTACTGTGCGTAGCTCTCGTGTAGGCAAGTTCCTAGGCTGGTCCTCCCGAGATCGGAAGAGCGG	-	1	1	1	0	1	1	1	1	1	1	1	1	1	1	-	1	1	0	1	1	1	1	0	1	-	1	1	-	1	1	-	1	1	1	-	1	1	1	1	1	1	1	1	-	1	1	1
4274833	TGCAGTGAGCAGCAAATTTGCTTTCCAAAAGGCCTTCCACCGCCGAGATCGGAAGAGCGGTTCAGCAGG	1	1	1	1	1	1	-	1	1	1	1	1	1	1	1	1	-	1	1	1	1	1	1	1	1	1	1	1	1	1	1	1	1	1	1	1	1	1	1	1	1	1	1	1	1	1	1	0
4266162	TGCAGCAGCGGCACCAACGACGCCACGGAGAACACCCCCGCGGTCACCAGGAACCAGCCCAGCCCGAGA	1	1	1	1	1	1	1	1	1	1	1	1	1	1	1	1	1	0	1	1	1	1	1	1	1	1	1	-	1	1	-	1	-	1	1	1	1	1	1	-	1	1	1	1	1	1	1	-
4295119	TGCAGCCTGAACACGTCGCGGTTCCACCGCCGGGCCGTCCGAGATCGGAAGAGCGGTTCAGCAGGAATG	1	1	1	1	1	1	1	1	1	1	1	1	1	-	1	1	1	1	1	-	1	1	1	1	1	0	1	1	0	1	1	1	1	1	1	1	1	1	1	-	1	1	1	1	1	1	1	1
4276963	TGCAGCAGTGAAGGTTGATCCTGTTTCGATGCAGTCGGAGCCTCCATTGCCGAGATCGGAAGAGCGGTT	1	1	1	-	1	1	-	0	1	-	1	-	1	1	1	1	1	-	1	-	1	1	1	-	1	1	1	1	1	-	1	1	1	1	1	1	1	1	-	1	1	1	1	-	1	1	0	1
4291119	TGCAGAAGCTTCCGGACGAGCCAGGCCGCGATGTAGCCGAGATCGGAAGAGCGGTTCAGCAGGAATGCC	1	1	1	1	1	1	1	0	1	1	1	1	1	-	1	1	1	0	1	-	1	1	1	1	1	1	1	-	-	1	1	1	-	-	-	1	1	-	1	1	1	1	1	-	1	1	1	1
4280646	TGCAGATCCACACTTTGTCGGGCGGAGGGAGCGGGGCAGAGCCTCCAGCATCGCTGGGAGCAATGGCCC	1	1	1	1	1	1	1	1	1	1	1	1	1	1	1	1	1	1	1	1	1	1	1	1	1	1	1	1	1	1	1	1	1	1	1	-	1	1	1	1	1	1	1	1	1	1	1	1
4273386	TGCAGCGCCGCGCTCCTGGACGACGTCTGGTCGGCGATCCTCTGCCGCCGCCGAGATCGGAAGAGCGGT	1	-	1	1	1	1	1	1	1	1	1	1	1	1	1	1	1	1	1	1	1	1	1	-	1	1	1	1	1	1	1	1	1	1	1	1	1	1	1	1	1	1	1	1	1	1	1	1
4268774	TGCAGACGAACACGATGCTTCTTCCCAGCGACGCAGGCAATCCGAGATCGGAAGAGCGGTTCAGCAGGA	1	-	1	1	1	1	1	1	1	1	1	1	-	1	1	1	1	1	-	-	1	0	-	1	1	1	1	1	1	1	1	1	1	1	1	1	1	1	1	1	1	1	1	1	1	0	1	1
4291529	TGCAGCCAGCCGAAGGCGGCGCCCCTGGTGTGGTCGTCCGTGTAGTCGGCGACCAGCGAGTTGATCGCC	1	1	1	1	1	1	1	1	1	1	1	1	1	1	1	1	-	-	1	-	1	1	1	1	1	0	-	1	1	1	1	1	1	1	1	-	1	1	1	1	1	1	1	1	1	1	1	1
4275838	TGCAGTGGGCTCACTTTCCACATATCCACTTTGGCCTCATGCCGAGATCGGAAGAGCGGTTCAGCAGGA	-	-	1	1	-	1	1	1	1	1	1	1	1	1	1	1	1	1	1	-	1	1	1	1	1	-	-	1	1	1	1	1	1	1	1	-	1	0	1	1	1	1	1	1	1	-	0	-
4277239	TGCAGGTGATCCTGCAACAGCAGCTGGAAGTGCTGGTCAAGAGGTACCGAGATCGGAAGAGCGGTTCAG	1	1	1	1	1	-	1	1	1	-	-	0	1	1	1	1	1	1	1	1	1	1	1	1	1	1	1	1	1	1	1	-	1	1	1	0	-	1	1	1	1	1	1	1	1	1	1	1
4268759	TGCAGGCACTGCTCCTTCGGGATCTGAAAAGAACCTAGTCTCCCGAGATCGGAAGAGCGGTTCAGCAGG	1	-	1	1	-	1	1	1	1	1	1	0	1	1	1	1	-	-	1	1	1	-	1	-	1	-	1	1	1	1	1	1	1	1	1	0	1	1	1	1	1	1	1	1	1	0	1	-
4271385	TGCAGCTCAAGGGGCACAGGTCGGTCGGCGGCGTGCGCGCCTCCATCTACAACGCCATGCAGCTCTCCG	1	1	1	1	1	1	1	1	1	-	1	1	1	1	1	1	1	1	1	-	1	1	1	-	1	1	1	0	1	1	1	1	-	1	-	-	1	1	1	1	1	1	-	1	1	1	1	1
4296560	TGCAGCCACCATTACTCTGCATGCATGCTACCACGGCCGAGATCGGAAGAGCGGTTCAGCAGGAATGCC	1	1	1	1	1	1	1	1	1	1	-	1	1	1	1	1	-	1	-	1	1	1	1	0	1	1	1	1	1	1	1	1	1	1	1	1	1	1	1	1	1	1	1	1	1	1	-	1
4279685	TGCAGAATCCCCCATACGGATACCTCCTCGGGCTCATCCACCTGGAGCCGAGATCGGAAGAGCGGTTCA	1	-	1	1	1	1	1	1	1	1	1	1	1	1	1	-	1	1	0	1	1	1	1	1	1	1	1	1	1	1	0	-	1	1	1	1	1	1	1	1	1	1	1	1	1	1	0	1
4327769	TGCAGGCATCTGCATCTGTGGCAACCCAACCCCAGACCCGAGATCGGAAGAGCGGTTCAGCAGGAATGC	1	1	1	1	1	1	1	-	1	-	-	1	1	-	1	-	1	1	-	1	-	1	1	0	1	-	1	-	1	1	1	1	1	1	1	-	1	1	1	1	1	1	1	1	1	0	1	1
4267364	TGCAGACCACGACGCAGTTAACCGCCCCAACAAAGGAGGTTCTCTTCTCCGCCGAGATCGGAAGAGCGG	1	1	1	1	1	1	1	0	1	1	1	1	1	1	-	1	1	1	1	1	1	1	1	1	1	1	1	-	-	1	0	1	1	1	-	-	1	-	1	1	1	1	-	1	1	1	1	1
4265481	TGCAGCAACCACTTGGTGATGATGTGCGTGCTCTCCCAGATCAACCTGGCCTGTCTTTTCGCGAGGAAG	1	1	1	1	-	1	-	1	1	1	1	1	1	1	1	-	1	1	0	1	1	1	1	1	-	1	1	1	1	1	-	-	1	1	1	0	1	1	-	1	1	-	1	1	1	0	1	-
4326427	TGCAGCTTCTTCTTCAACTCCTCTAGCCCCGACATGGGGGCTCGCTGGTGACCACCCGAGATCGGAAGA	1	1	1	1	1	1	1	1	1	1	1	1	1	1	1	1	-	1	1	-	1	-	1	0	1	1	1	-	1	1	1	-	1	1	1	1	1	1	1	0	1	1	1	1	1	0	1	1
4293876	TGCAGAACCATAAACAGAAAATGCAGGTGAGCATCAGGACACTTGCTAACACCGAGATCGGAAGAGCGG	1	-	1	1	1	1	1	1	1	1	1	-	1	1	1	1	1	1	1	1	1	1	1	1	1	1	1	1	1	1	-	1	-	1	0	-	1	1	0	1	1	1	1	1	1	1	1	-
4290900	TGCAGAGAGTGCGCGACGACGGCGGAGGAGCGGTTGGCTTCCATTAGAGGCTGCACGCCGAGATCGGAA	-	1	1	1	1	1	1	0	1	1	1	-	1	1	1	1	1	1	1	1	1	1	1	1	1	1	1	1	-	1	1	1	1	1	1	-	1	0	1	-	1	1	1	1	1	1	1	1
4268829	TGCAGGTAGCCGCTGCCGTTCTGCCCAGGCATCGTCGCCGAGATCGGAAGAGCGGTTCAGCAGGAATGC	1	1	1	1	1	1	1	1	1	1	1	1	1	1	1	-	1	1	1	1	1	1	-	-	1	-	1	1	1	1	1	1	1	1	1	1	1	1	1	1	1	1	1	1	1	1	1	1
4327956	TGCAGTCACTCGGGGGGCCTTGCTGGAGGAGCACGGCCGAGATCGGAAGAGCGGTTCAGCAGGAATGCC	1	-	1	1	1	1	1	0	-	-	1	1	1	1	1	1	1	1	1	1	1	1	1	-	-	-	1	1	1	1	1	1	1	1	1	1	1	1	1	1	1	1	1	1	1	1	1	1
4271349	TGCAGAACTCCATGAGGAGGCAGAAGAACTTGTCGGTCTCGAAGTGGGAGTAGAGCGTGGGGAGGAAGG	1	-	1	1	1	1	1	1	1	1	1	1	1	1	1	1	1	1	-	1	1	1	1	-	1	1	1	1	1	-	-	1	1	1	1	1	1	1	1	1	1	1	1	1	-	0	0	1
4272805	TGCAGATGTTGACACGCTGCACCAGGCTGAGCTCGGCCGAGATCGGAAGAGCGGTTCAGCAGGAATGCC	1	1	1	1	1	1	1	-	1	1	1	1	1	1	1	1	1	1	1	1	1	1	-	-	1	1	1	1	1	1	1	1	1	1	1	1	1	0	-	1	1	1	1	1	1	1	0	1
4288235	TGCAGCGTCCTGAGCACCACGTCCATCGTGTTGCCATGCGCCGAGATCGGAAGAGCGGTTCAGCAGGAA	-	1	1	-	1	1	1	1	1	1	1	1	1	1	1	-	1	1	-	1	1	1	-	1	-	1	1	1	1	-	1	1	1	-	1	1	-	1	1	1	1	1	-	1	1	1	1	-
4263959	TGCAGGGGGCTACGGAACACTCGAGGAGCTTCTGGAAGTAATCACGTGGGCCCAGCTTGGCATCCACGA	-	1	1	1	1	1	1	1	1	1	1	1	1	1	1	1	1	-	-	1	1	1	1	1	1	1	1	1	-	1	0	1	1	1	1	1	1	1	1	1	1	1	1	-	1	0	1	1
4282137	TGCAGCAGCTCAAGAGAGTGGACGACTGGCTCAACCATGTGGTGCGGCACGAGAGGATGCTTCCGAGAT	1	0	1	1	1	1	-	1	1	1	1	-	1	1	1	1	1	1	1	-	1	1	1	-	1	1	1	1	1	1	1	1	1	-	-	-	1	1	-	1	1	1	1	1	1	1	-	1
4326901	TGCAGCGCCGCGCCGCCGCCGCCGTCACCGTGCAGGCCGCGTTCCGAGATCGGAAGAGCGGTTCAGCAG	1	0	1	1	1	-	1	-	1	1	1	1	1	1	1	-	1	1	1	1	1	-	-	0	-	1	1	1	-	1	-	1	0	1	-	1	1	1	1	1	1	-	-	1	1	1	1	1
4298697	TGCAGCCTTCCGCTCGCCCGAGCCGAGCCATTTGCATTTTCTGCCGAGATCGGAAGAGCGGTTCAGCAG	1	1	1	1	1	1	1	-	0	0	0	1	-	1	1	1	1	1	1	1	1	1	1	1	1	1	1	1	1	-	1	-	1	1	1	1	1	1	1	1	1	1	1	1	1	1	0	1
4283617	TGCAGCCACAAGAGGATCCACAACTCCGTCCAGCCCAATATCGCCAGCAACGCGCCCGCTGCGGCGGCG	1	1	1	1	1	1	1	0	1	1	1	1	1	1	1	1	1	1	1	1	1	1	1	1	1	1	1	1	1	1	1	1	1	1	1	1	1	1	1	1	1	1	1	1	1	1	1	1
4268840	TGCAGCGTCTTCGCCCCAGTGCCGTCCATCAGCGACATGATCGTGAACAGATACAAGCTCCGTGATGAC	1	1	1	1	1	1	1	1	1	1	1	0	1	1	1	1	1	1	1	1	0	1	1	1	1	1	-	1	1	1	1	1	1	1	1	0	1	1	1	1	1	1	1	1	1	1	-	1
4293584	TGCAGGAAGGCGAACATTACCTGCTCTGGAGAAATCCTGCCGAGATCGGAAGAGCGGTTCAGCAGGAAT	-	-	1	1	1	1	1	-	1	1	1	-	1	1	1	1	1	1	1	-	1	1	-	1	1	1	1	1	1	1	1	1	1	1	1	1	1	1	-	1	1	1	0	1	1	1	1	1
4304404	TGCAGTCGGGGAAAGGGGACCGCGGCCCGGTCGGATCCGAGATCGGAAGAGCGGTTCAGCAGGAATGCC	1	1	1	1	1	1	-	1	-	1	1	1	1	1	1	1	1	1	1	-	1	1	1	1	1	1	1	1	1	1	1	1	1	1	1	1	1	1	1	1	1	-	1	1	1	1	0	1
4300876	TGCAGCTTCTCGTCGTCTAATCGGCCTCGGCGCTGCCGCAGCAGCATCTTTTATGTACGTCTCCTCCGA	1	-	0	1	1	1	1	-	1	1	1	1	1	1	1	1	1	1	0	1	1	1	1	-	1	1	1	-	1	1	1	1	1	1	1	1	1	1	-	1	1	1	1	1	0	1	1	-
4269045	TGCAGTGTGCAGTCAAGCAGAGTAATAAATTCTGACAACAGCGTGCTCCGTCCTCGCCGAGATCGGAAG	1	-	1	1	0	1	1	1	1	1	1	1	-	1	1	1	1	1	1	1	1	1	1	0	1	1	-	1	1	1	1	1	1	1	1	1	1	1	1	1	1	1	1	1	0	1	-	1
4273701	TGCAGAAGCCAAAGATTCACTCTGAACTCTACTCTCTCCGAGATCGGAAGAGCGGTTCAGCAGGAATGC	1	-	1	1	-	1	-	1	1	1	1	1	1	-	-	1	1	1	1	1	1	1	1	0	-	1	1	1	1	1	1	1	1	1	1	1	-	1	1	-	1	1	1	1	1	-	-	1
4269205	TGCAGCTGTTCCAGGAGTACAAGGAGAAGGTCGGGGGCACCATCCCGAGATCGGAAGAGCGGTTCAGCA	1	1	1	1	1	-	1	1	1	1	-	1	1	1	1	1	1	1	1	1	1	1	1	1	1	1	0	-	1	1	1	1	1	1	1	1	1	1	1	1	1	1	1	1	1	1	0	1
4270805	TGCAGGGCACACACAAGCTGCATGCATCAGTGGGTGCTCCGAGATCGGAAGAGCGGTTCAGCAGGAATG	-	1	1	1	-	1	1	-	1	1	1	-	-	1	1	1	-	1	-	1	1	1	1	1	1	1	1	1	1	1	1	1	1	1	1	1	1	-	1	1	-	1	1	-	1	1	0	-
4325657	TGCAGATTCACTGTGTGACCATACGAAAATGGTCGTCGGCATGTGCGCAGGTTGACGTATCCGAGATCG	1	-	1	1	0	-	1	1	1	1	1	-	1	1	1	1	1	-	1	1	1	1	1	1	1	1	1	0	1	-	1	1	1	1	1	1	1	-	1	1	1	1	1	1	1	1	-	1
4299477	TGCAGGTCTTCTTGGGTCGCCACCGCCCAGCATCCCGAGATCGGAAGAGCGGTTCAGCAGGAATGCCGA	1	-	1	1	1	1	1	-	1	1	-	1	1	1	1	1	1	1	1	-	1	1	1	1	1	1	1	1	1	1	1	1	1	1	1	1	1	1	1	-	1	1	-	1	1	0	1	1
4300951	TGCAGGCAAACATTAGCAGGCGCAGAAAGAGAGCGCAGTGGCAAGCAAGCGTATGTGGATGGTGAGAGA	1	1	1	1	1	1	1	1	1	1	1	1	1	1	1	1	1	1	1	1	1	1	1	1	1	1	1	1	1	1	1	1	1	1	1	1	1	1	1	1	1	1	1	1	1	1	1	1
4273851	TGCAGACCGTAGATTGGAAGCAGAGTGTTCTTTCTACACCGACGTCTTTCCAATCAAGACTCCGAGATC	-	1	1	1	1	1	1	1	1	1	1	1	1	1	1	1	1	1	1	1	1	-	1	1	-	1	1	1	1	1	0	0	1	-	1	1	1	1	1	1	1	1	1	1	1	0	1	1
4306281	TGCAGCTATTAGAGTTCAGAGATAGCCTGAACCTGACAACCCCGCAGCCATAGCCACGCAGCCGAGCAG	1	0	1	1	1	1	0	1	1	1	1	1	1	-	1	1	1	1	1	1	1	1	1	1	1	1	1	1	1	1	1	1	1	1	1	1	1	1	1	1	1	1	1	1	1	1	1	1
4294521	TGCAGCGCCCCTCCAGCGGCCCCAAGAAGAGCGGGACCGCGAGCAGGCCGAGATCGGAAGAGCGGTTCA	1	1	1	-	1	1	1	1	1	1	1	0	1	1	-	1	1	1	1	1	1	-	1	1	1	1	1	1	1	1	0	1	0	1	-	0	1	-	1	1	1	1	1	1	1	1	1	1
4268540	TGCAGCCGACTTGATGGCCGCCACCCGTCGATAAAACCACATTTTTGGTGGAGCCAGGCCTCCGAGATC	-	-	1	1	-	1	-	1	1	1	1	1	-	1	1	1	1	1	1	1	-	1	1	1	1	1	1	1	1	1	1	1	1	1	1	1	1	1	-	1	1	1	1	1	1	-	1	1
4328547	TGCAGCGCCGTTGGGGAACGGCACGAAGACGAAGAACCCCGAGATCGGAAGAGCGGTTCAGCAGGAATG	1	1	1	-	1	1	1	1	1	1	1	1	1	-	1	1	1	1	1	0	1	-	1	1	-	1	1	1	1	1	1	1	1	1	1	1	-	1	1	1	1	1	1	1	1	1	1	1
4272193	TGCAGCTCCTTGATCTGCTGCTGGTACTTGGCGACGGTCTCATTGAACTGGGACCGCTCCTGCACCATG	1	-	1	1	1	1	1	1	1	0	1	1	1	1	1	1	1	1	1	1	1	1	1	1	1	1	1	1	1	1	1	1	1	1	1	1	1	1	1	1	1	1	1	1	1	1	1	-
4276161	TGCAGCACTATCTTCCAGCAGTCAGCCGCGGCCTCGGCCACCTCGCCCTCCCCCGAGATCGGAAGAGCG	-	1	-	1	1	1	1	1	1	1	1	1	1	1	1	1	-	1	0	0	1	1	1	1	1	1	1	1	1	1	1	1	1	1	1	1	1	1	1	1	1	1	1	1	1	1	1	1
4302148	TGCAGCTGTTGTACGAATAAGGGTTTGGTAGAGCTCCGAGATCGGAAGAGCGGTTCAGCAGGAATGCCG	1	1	1	1	1	-	1	1	1	1	1	0	1	1	1	1	1	1	1	1	1	1	1	1	1	1	1	1	1	1	-	1	1	1	1	1	1	-	1	1	1	1	0	1	1	1	1	1
4267308	TGCAGCCTTGGCCCTTGGCCCTTCTTGCGTTTTGGGCTTGAAATGAGTTTAGCCCATGCTCTAATGGCC	1	1	-	1	1	1	1	1	1	1	1	1	1	-	1	1	1	1	0	1	1	1	1	1	1	-	1	1	0	1	-	-	1	1	1	1	1	1	1	1	1	1	1	1	1	1	-	1
4272377	TGCAGTGAGTGACTAATCATCGTGCCCTGTCAAGTGTCAAGATTAATGCCGCATTAATTTGTCCCTGGC	1	-	1	1	1	1	1	1	1	1	1	-	1	1	1	1	1	1	1	1	1	1	1	1	1	1	1	1	1	1	1	1	1	1	1	1	1	1	1	1	1	1	1	1	1	1	-	1
4304227	TGCAGGCGTCCGTCAATGCCGACGGGACCTTCGGCGAGGTCTTCGCCGAGATCGGAAGAGCGGTTCAGC	1	-	1	1	1	1	1	1	1	1	1	1	1	1	1	1	1	1	-	1	1	1	1	-	1	1	1	1	1	1	1	1	1	1	1	-	1	-	1	1	1	1	1	1	1	1	1	1
4266323	TGCAGGATCCAGTCACGACGATGCGGCCAAGCGTCGCTGCCTCCGCCCTGCCGACGATTCCGCGGGCGC	1	1	1	1	1	1	1	1	1	1	1	-	1	1	1	1	1	1	1	1	1	1	1	1	1	-	1	1	1	1	1	-	-	1	-	1	1	1	1	1	1	1	-	-	1	1	1	1
4263966	TGCAGAATTTCTGACTTTTCGCGGAGGACTAGATCCAGTAACCGAGATCGGAAGAGCGGTTCAGCAGGA	1	1	-	-	1	1	-	-	-	1	1	1	1	-	-	1	1	1	1	1	1	1	1	1	1	1	1	1	1	1	1	1	1	1	1	1	1	1	1	1	1	1	1	-	1	1	1	1
4270635	TGCAGCCCCCACTGCCACACGTGCGCCACCTCGTGGTACAGCACCCCGGTCACCTGGTCCTTGAGGTCG	1	1	-	1	1	1	1	1	1	-	-	1	1	1	1	1	1	1	1	-	1	1	1	1	1	-	1	1	1	1	1	-	1	1	1	0	1	1	1	1	1	1	1	1	1	0	1	1
4263148	TGCAGGTGGAGAAGGAATGAGCAGACCTCCTCCCTTGCCTAGAGGGAAGAGACGAGAGGAGATGGGGAC	-	1	1	1	-	1	1	1	1	1	1	1	1	1	1	1	1	1	1	1	1	1	1	1	1	1	1	0	1	1	1	-	1	1	1	0	1	1	1	1	1	1	0	1	1	1	1	1
4278018	TGCAGACATAGGCAATTTGGTTGGTCTCACCAGGCTTGCAATAGCAAACAATTATGTATCCGAGATCGG	1	1	-	1	1	1	-	-	1	1	1	-	1	1	1	1	1	1	1	1	1	1	1	1	1	1	1	1	1	1	1	-	1	1	1	1	1	1	1	1	1	1	-	1	1	0	1	1
4271595	TGCAGCCGGTGCTTCCTCGGCGACGGCCGCCACCTCCGAGATCGGAAGAGCGGTTCAGCAGGAATGCCG	-	1	1	1	1	1	1	1	1	1	1	1	1	1	1	1	1	-	1	1	1	1	1	1	1	1	1	1	1	1	0	1	1	1	1	1	1	1	1	1	1	1	1	-	1	1	1	1
4301275	TGCAGGTTTTCGCGCGCGCGCGGAATCAAAATCTCGAACCGAGATCGGAAGAGCGGTTCAGCAGGAATG	1	-	1	1	1	1	1	1	1	1	1	1	1	1	1	1	1	1	1	-	1	1	1	1	1	1	1	1	1	1	1	1	1	1	1	1	1	1	1	1	1	1	1	1	1	-	1	-
4285067	TGCAGAGGGCTGGGGCAGTGCGGCGACGACCGAGATCTGAAGAGCGGTTCAGCAGGAATGCCGAGACCG	1	1	-	1	0	1	1	-	1	1	-	0	1	1	1	1	1	1	1	1	1	1	1	1	1	1	1	-	1	1	1	1	-	1	1	1	1	1	1	-	1	1	1	1	1	0	0	1
4288580	TGCAGTCGCTGCTGCTCTGGCAGAACCAGCTCGTCGGCGCGATCCCGCCCAGATCGGAAGAGCGGTTCA	-	1	1	1	1	1	1	1	-	1	1	1	1	-	1	1	1	1	1	-	1	1	1	1	0	1	1	1	1	1	1	1	1	1	1	1	1	1	1	1	1	1	1	1	1	-	1	1
4276836	TGCAGTCGGCCGCCAGATTGCTTCCGCAGTCGGCCCGAGATCGGAAGAGCGGTTCAGCAGGAATGCCAA	1	1	1	1	1	1	1	1	-	-	1	1	1	-	-	1	1	1	1	1	1	1	1	1	1	-	1	1	1	1	1	1	1	1	1	1	1	1	1	1	1	1	1	-	1	1	1	1
4270157	TGCAGTCGGCCGCCAGATTGCTTCCGCAGTCGGCCTGAGATCGGAAGAGCGGTTCAGCAGGAATGCCGA	1	1	1	1	1	1	1	1	-	-	1	1	1	-	-	1	1	1	1	1	1	1	1	1	1	-	1	1	1	1	1	1	1	1	1	1	1	1	1	1	1	1	1	-	1	1	1	1
4293769	TGCAGCCCCTTGGGGAAGATGGCCGAGATCGAAAGAGCGGTTCAGCAGGAATGCCGAGACCGATCTCGT	-	1	1	1	0	1	1	1	1	1	1	1	-	1	-	-	1	1	1	1	1	1	1	1	1	1	1	1	1	1	0	-	1	1	-	1	1	0	1	1	1	1	0	1	1	1	-	1
4270883	TGCAGCCCCTTGGGGAAGATGGCCGATATCGGAAGAGCGGTTCAGCAGGAATGCCGAGACCGATCTCGT	-	1	1	1	0	1	1	1	1	1	1	1	-	1	-	-	1	1	1	1	1	1	1	1	1	1	1	1	1	1	0	-	1	1	-	1	1	0	1	1	1	1	0	1	1	1	-	1
4272199	TGCAGGGCAGGCGGACGGCGCGGGAAGGCGGACCCGACTAGGGAGCCGAGATCGGAAGAGCGGTTCAGC	-	1	1	-	1	1	1	1	-	-	-	1	1	-	-	1	1	1	1	1	1	1	1	1	1	1	1	1	1	1	-	1	1	1	1	1	1	1	1	1	1	1	1	1	1	1	1	1
4267875	TGCAGCTTGAACAGGGAGAAGGACAGGCAGAGATCCTTGGTGTGCGGATAAGCCGCGAGGAGCGAGTCT	1	-	1	1	1	1	1	1	0	0	0	1	1	1	1	1	1	1	1	0	1	1	1	1	1	1	1	1	1	1	1	-	1	1	1	1	1	1	1	1	1	1	1	1	1	1	1	1
4329152	TGCAGGTTTCTTTCTGAAGACGCACGACTTCTTGCAGCCGCTGGAGAAGCCGAGATCGGAAGAGCGGTT	1	-	-	1	1	1	1	0	1	1	1	1	1	1	0	1	1	1	1	-	1	1	1	1	1	1	1	1	1	1	1	1	1	1	1	1	1	-	1	1	1	1	1	1	1	1	1	-
4301091	TGCAGCCTGAACCTGGCGAGGCCATCGTTCAGAGCCATCCGAGATCGGAAGAGCGGTTCAGCAGGAATG	-	-	1	1	1	1	1	1	1	1	1	-	-	1	1	-	1	1	0	1	1	1	1	1	1	-	1	1	1	1	1	1	1	1	1	-	1	1	1	1	1	1	0	1	1	1	1	1
4270005	TGCAGCTCCGCGTCGCCCTGCACCACGCCGTCGTCCGAGATCGGAAGAGCGGTTCAGCAGGAATGCCGG	1	1	1	1	1	1	1	1	-	-	1	1	1	-	1	1	1	1	1	-	1	1	1	1	1	1	1	1	1	1	-	1	1	1	1	1	1	1	1	1	1	1	1	1	1	1	1	1
4288925	TGCAGCTCCGCGTCGCCCTGCACCACGCCGTCGCCCGAGATCGGAAGAGCGGTTCAGCAGGAATGCCGA	1	1	1	1	1	1	1	1	-	-	1	1	1	-	1	1	1	1	1	-	1	1	1	1	1	1	1	1	1	1	-	1	1	1	1	1	1	1	1	1	1	1	1	1	1	1	1	1
4294887	TGCAGAACGAGCACCCTCGTGAGGTTCCCCACGAGCTCCGAGATCGGAAGAGCGGTTCAGCAGGAATGC	1	1	1	1	1	1	1	1	1	1	1	1	1	1	1	1	1	1	1	1	1	1	1	1	1	0	1	1	1	1	1	1	1	1	1	1	1	0	1	1	1	-	1	1	1	1	1	1
4280579	TGCAGGCCCTGCTCGCGCACCTGTGGCGTGCGGTGTGCCGAGATCGGAAGAGCGGTTCAGCAGGAATGC	1	1	1	1	1	1	1	1	1	1	1	1	1	0	1	1	1	1	1	1	1	1	1	1	1	1	1	1	1	1	1	-	1	1	-	1	1	-	1	1	1	1	1	1	1	1	1	1
4287112	TGCAGCGCGTCAATCACCACATCCATGCGCCCCCGAGTGTAGTCCTCGAGCCGAGATCGGAAGAGCGGT	1	1	1	1	1	1	1	1	1	1	1	1	1	1	1	1	1	1	1	1	1	1	1	1	1	1	1	1	1	1	-	1	1	1	1	1	1	1	1	1	1	1	1	1	1	1	1	1
4269011	TGCAGTCACAGGAAAAACACAGGAAAGCGGCAGAGGGAGCCGAGATCGGAAGAGCGGTTCAGCAGGAAT	1	1	-	1	0	1	1	1	1	1	1	0	1	1	1	1	1	1	-	1	1	1	1	1	1	1	1	-	1	1	-	1	1	1	1	1	1	1	1	1	1	1	1	1	1	1	-	1
4328634	TGCAGCGAGGCCGAGGAGTAGTGCCCGTCGAGGACGAAGGAGACGGACGCAGGGAAGCTGTAATTGTCG	1	-	1	1	1	1	1	1	1	1	1	1	1	1	1	1	1	1	1	1	1	-	1	1	1	1	1	1	1	1	-	1	1	1	0	-	1	1	1	1	-	1	1	0	1	1	1	1
4267138	TGCAGGGAACAGAGGAACACACGAACCGAGTTCGGAAGAGCGGTTCAGCAGGAATGCCGAGACCGATCT	1	1	1	1	1	1	1	1	1	1	1	1	1	-	1	1	1	1	1	-	1	1	1	1	1	1	1	1	1	1	-	1	1	1	1	1	1	1	-	1	1	1	1	1	1	1	1	1
4294792	TGCAGCTTCTATGCAACTATACGACGCCCGAGCAAGCTTCCGAGATCGGAAGAGCGGTTCAGCAGGAAT	1	-	-	1	1	1	-	1	0	0	0	1	-	1	1	1	1	1	-	1	1	-	1	1	1	1	1	1	1	1	-	1	1	1	1	-	1	1	1	1	1	1	1	1	1	-	1	-
4302864	TGCAGGCCAGTAGGGGGCTGCTCACGTCCGACCAGACGCTGCTCACCGAGATCGGAAGAGCGGTTCAGC	1	1	-	1	1	1	1	1	-	-	1	0	1	1	1	1	1	1	1	0	1	-	1	1	1	1	-	1	1	1	1	1	1	1	1	1	1	1	1	1	1	1	1	0	-	1	1	1
4275800	TGCAGCTCCTCGTACCACCGTATGGCACTTGCTCTCCGAGATCGGAAGAGCGGTTCAGCAGGAATGCCG	1	1	1	1	1	1	1	1	1	1	1	1	1	1	1	1	1	1	-	1	1	1	1	1	1	1	1	1	1	1	1	-	1	1	1	-	1	1	1	1	1	1	1	-	1	-	1	1
4278434	TGCAGCTCGCTGACTTGGCTCTGTAAAGTCAGCTAATCCGAGATCGGAAGAGCGGTTCAGCAGGAATGC	1	1	-	1	1	1	1	-	1	-	1	1	1	1	1	1	1	1	1	1	1	-	1	-	1	1	1	1	-	1	1	1	1	1	1	1	1	1	-	1	1	-	1	1	1	1	1	-
4294487	TGCAGGAGCTCGGGGTCACCGCGCTGCTTAACCTGTCAATCTGCGACGAGAACAAGGCCATCATGGTCG	1	1	-	1	1	-	1	0	1	1	1	1	1	1	1	1	1	1	0	1	1	1	1	1	1	0	1	1	1	1	1	1	1	1	1	-	1	1	1	1	1	1	1	1	1	1	1	1
4324271	TGCAGGGCGGTGTCGTTGCCCTTGAACGCCTCGTTGCCGACGGTGATGCAGGTGATGCGCGCGCCCAGA	1	-	1	1	1	1	1	1	1	-	1	-	1	1	1	1	-	1	1	0	1	1	1	1	1	0	1	1	1	1	1	1	1	1	1	1	1	1	1	1	1	1	-	1	1	1	-	1
4303040	TGCAGAATCGCCCAATACTCTCCGCCATATTCAGTTCTCGCGGACGGCGCATCCGAGATCGGAAGAGCG	1	1	1	1	1	1	1	1	1	1	1	1	1	1	1	1	1	1	1	1	1	1	1	1	1	1	1	0	1	1	1	1	1	1	-	0	1	1	1	1	1	1	1	-	1	0	1	-
4292053	TGCAGCTGGAGCTCCACCAGCTCCCGGCATTCCCGATTTCTGGTGGGATTGTTCCGAGATCGGAAGAGC	1	1	1	1	1	1	1	0	1	1	1	1	1	1	1	1	1	1	1	0	1	1	-	1	1	1	-	1	1	1	1	1	1	1	1	1	1	1	1	1	1	1	1	1	1	1	1	1
4263188	TGCAGGGGCGCTTCTACTTCGCGACTCTCGAGGGGCACCTAATGCATGCCCGAGATCGGAAGAGCGGTT	1	-	1	1	-	1	1	1	1	1	0	0	1	1	1	1	1	1	1	0	1	1	1	1	1	1	-	1	1	1	1	1	1	1	1	0	1	1	1	1	1	1	1	1	1	1	1	1
4263843	TGCAGCCAGCTCATCTCCTTGCAGTCGGCGATCGTCACCCCGAGCTCTGGGAACCGAGATCGGAAGAGC	1	1	1	1	1	1	1	0	0	0	0	1	1	1	1	1	-	1	1	-	1	1	1	1	1	1	1	1	1	-	1	1	-	1	1	-	1	1	-	1	-	1	1	1	1	1	1	1
4274247	TGCAGCAGCAGCAGCAGCAGACCAGCTCGCTGGCCCGAGATCGGAAGAGCGGTTCAGCAGGAATGCCGA	-	1	1	1	1	1	1	1	1	1	1	1	1	1	1	1	1	1	1	1	1	-	1	1	1	1	1	1	-	-	1	1	1	1	1	1	-	1	1	1	1	1	1	1	1	1	1	1
4296051	TGCAGCTCCGCCATGCCGCTCTGCTGCCACGCGACCGCCTCACGCGGCGCGGCCGCCTCGTCACCGAGA	-	1	1	-	1	1	1	-	1	1	1	1	1	1	1	1	1	1	1	1	1	1	1	1	-	1	1	1	1	1	1	1	1	1	1	1	1	1	1	1	1	1	1	1	1	1	1	1
4297865	TGCAGTCCACCATGGAGGACGAGCTGATCGCAGCCAGGGAGAGCGGGCTCCTCGCCGAGATCGGAAGAG	1	1	1	1	1	1	1	0	1	1	-	1	1	1	1	1	-	1	1	1	1	1	-	1	1	0	1	1	1	1	1	1	1	1	1	1	1	1	1	1	1	1	1	1	1	1	1	-
4299643	TGCAGAAGCACGGCCCCATCGAGGGCAAGAACGTCTTCTACTGGTTCCAGAACCACAAGGCCCGAGATC	1	1	1	1	1	1	1	1	0	0	0	1	1	1	1	1	1	1	1	0	1	1	1	1	1	1	1	0	1	1	1	1	1	1	1	1	1	1	1	1	1	1	1	1	1	-	1	1
4271073	TGCAGGTGTGAAACGCGTTGTTCCAATGCGCGCGCCCGTTCGGATCAACTCTCAAAGTCCACCGAGATC	1	-	1	1	1	1	1	1	1	1	1	1	-	1	1	1	1	1	1	1	1	1	1	1	1	1	1	1	1	1	-	1	1	1	1	-	1	1	1	1	1	1	1	1	1	1	1	1
4296403	TGCAGTAGACGCTCACGGTGAGCACGGCGCCGAGATAGGAAGAGCGGTTCAGCAGGAATGCCGAGACCG	1	1	0	1	1	1	1	1	0	0	0	1	1	1	1	1	1	1	1	0	1	1	1	1	1	1	1	1	1	1	1	1	1	1	1	1	1	1	1	1	1	1	1	1	-	1	-	1
4280436	TGCAGGAAGAAGGAGGAGCGCGGGCGCTCAGCAAGGCACTGAAGGTGAAGCCGTCGCCGAGATCGGAAG	1	1	1	1	1	1	1	1	1	1	1	1	1	1	1	1	1	1	1	1	1	-	1	1	1	1	1	1	1	1	1	-	1	1	-	1	1	1	1	1	1	1	1	1	1	1	1	1
4305904	TGCAGTTCATCGACGTCGCTTACCGCGTCAAGGTGGAGAGGACGGCCGAGATCGGAAGAGCGGTTCAGC	1	1	1	1	1	1	1	1	-	-	-	1	1	1	1	1	1	1	1	1	1	1	1	1	1	1	1	-	1	1	1	1	1	1	1	1	1	1	1	1	1	1	1	1	1	1	1	1
4289677	TGCAGAGATCGCACCAAAAATGATGGATGGAACCAGTGCACGTGGACCGAGATCGGAAGAGCGGTTCAG	1	-	1	1	1	1	-	1	0	0	0	-	-	1	1	1	-	1	1	1	1	1	1	1	1	-	1	1	1	1	1	1	1	1	1	1	1	1	1	-	1	1	1	1	1	-	0	1
4302646	TGCAGCGGTACGGCGTCGATGGGTTCCGTGGCCATTGCTTCCGAGATCGGAAGAGCGGTTCAGCAGGAA	1	-	1	1	-	-	1	1	1	1	1	1	1	1	1	1	1	-	-	1	1	1	1	-	1	1	1	1	1	1	1	1	1	1	1	1	1	1	1	1	1	1	1	1	1	1	1	1
4271704	TGCAGGCCTTGTACATGGCCACGTGTGCGCCGAGATCGAAAGAGCGGTTCAGCAGGAATGCCGAGACCG	1	-	1	1	1	1	1	1	0	0	0	1	1	1	1	1	1	1	1	0	1	1	1	1	1	1	1	1	-	-	1	-	1	1	1	1	1	1	1	1	1	1	1	-	1	1	1	1
4279426	TGCAGATTAAGTAACTAACGAAGCTAAGTTAGCTCGGCCGAGATCGGAAGAGCGGTTCAGCAGGAATGC	1	-	1	1	-	1	1	-	1	1	-	1	1	1	1	1	1	1	1	1	1	1	1	0	1	1	1	1	1	1	1	1	-	1	1	0	1	1	1	1	1	1	1	1	-	1	-	1
4277452	TGCAGCGGCCACGGGAACACGAGAACATGCGCCGAGATCAGAAGAGCGGTTCAGCAGGAATGCCGAGAC	1	0	1	-	1	-	0	1	1	1	1	1	1	1	1	1	1	1	1	1	1	-	1	-	1	1	1	1	1	1	1	1	1	1	1	1	1	1	1	1	1	1	1	-	1	1	1	1
4294212	TGCAGCTAGCCGATCGGCAATGGCGACCAAGATCTACATCGTGTAATGCTCCGCCTCTGCTCGCCCTTC	1	1	1	1	1	1	1	1	1	1	1	1	1	1	1	1	1	1	1	1	1	1	1	1	1	1	1	1	0	1	1	1	1	1	1	-	1	1	1	1	1	1	1	1	1	1	1	1
4290760	TGCAGTGCAGTAAATCCACGCGACCACACTATCCTCCCGAGATCGGAAGAGCGGTTCAGCAGGAATGCC	1	1	1	1	1	1	1	1	0	0	0	-	1	1	1	1	1	1	0	0	1	1	1	1	1	-	1	1	1	1	1	-	1	1	1	1	1	1	1	-	1	-	1	-	1	1	1	1
4270230	TGCAGACGACAGGCGGCACCAGCCTACTGCTCAGCACTGTCCTTGGAATTAAAATCTCCGAGATCGGAA	1	-	1	1	1	1	1	1	1	1	1	1	1	1	1	1	-	1	1	1	1	1	1	-	-	1	1	0	1	1	1	1	1	1	1	1	1	1	-	1	1	1	-	0	1	-	1	1
4298199	TGCAGGTTCCCGAGCTCATGTCACTCATGGCATGGCATCTTCCGAGATCGGAAGAGCGGTTCAGCAGGA	1	-	1	1	1	1	1	0	1	1	1	1	1	1	1	1	-	1	1	1	1	1	1	1	1	0	1	0	1	1	1	1	1	1	1	1	1	1	1	1	1	1	1	1	1	-	1	1
4297782	TGCAGCCTCCTCACCACGGCACACCCCTTCTTCTTCCTCCGAGATCGGAAGAGCGGTTCAGCAGGAATG	1	1	1	1	1	1	1	1	1	1	1	1	1	1	1	1	1	1	1	1	1	1	1	1	1	1	1	1	1	1	1	1	1	1	1	1	1	1	1	1	1	1	1	1	1	1	1	1
4291127	TGCAGGTTGCTTGTGCTTGGAAGATGAGTCCAGGCGCCCCGCCGAGCCGCCGAGATCGGAAGAGCGGTT	1	1	1	1	1	1	1	0	0	0	0	1	1	1	1	1	1	1	1	1	1	1	1	1	1	1	1	1	-	1	1	1	1	1	1	1	1	1	1	-	1	1	1	1	1	1	1	-
4272550	TGCAGCCTGTTTTGCCCAGTGCCATCCATCGCCGACCGAGATCGGAAGAGCGGTTCAGCAGGAATGCCG	1	1	1	1	1	1	1	-	1	1	1	1	1	1	1	1	1	1	0	1	1	1	1	-	1	1	1	1	0	0	1	-	-	1	1	1	1	1	1	1	1	1	1	1	0	1	1	1
4304126	TGCAGACATATTCACTGTGGCTGACCCACTGGAGGGGAGCACCGAGATCGGAAGAGCGGTTCAGCAGGA	1	1	1	1	1	1	1	1	-	1	1	1	1	1	1	1	1	1	1	1	1	1	1	1	1	1	1	1	1	1	1	1	1	1	0	-	1	1	1	1	1	1	1	1	-	1	1	1
4286727	TGCAGTTCACTCGAGACTAAATCAGCCCCTCCTCCCCTTGCAGCCAGGAGTCCCGAGATCGGAAGAGCG	1	1	1	1	1	1	1	1	1	1	1	1	1	1	1	1	1	1	-	1	1	1	1	1	1	1	-	1	1	1	1	1	1	1	1	1	1	1	1	1	1	1	1	1	1	1	1	1
4294221	TGCAGTGTTGTAGATCTCTTGCGAGGCTGGTACCTATGTCCGAGATCGGAAGAGCGGTTCAGCAGGAAT	1	1	1	1	1	1	0	1	1	-	1	1	1	1	1	1	1	1	1	-	1	1	1	1	1	1	1	-	1	1	1	1	-	1	1	-	1	1	1	1	1	1	1	-	1	1	1	1
4301222	TGCAGAATCGGAGCAGAGGGGAGGGGAATCGGAATGGGGCTCTCGCCGTCGCCGTCCTCACCGAGATCG	1	-	1	1	1	1	1	0	1	1	1	-	1	1	1	1	-	1	1	1	1	1	1	1	1	0	1	1	1	1	1	1	1	1	1	1	1	-	1	1	1	1	1	1	-	-	1	-
4303259	TGCAGTGGCAATGATAATTTTTAGCAAACGAACGACCGAGATCGGAAGAGCGGTTCAGCAGGAATGCCG	0	1	1	1	1	1	1	1	1	1	1	1	1	1	1	1	-	1	-	1	1	1	1	0	1	0	1	1	1	1	1	1	1	1	1	0	1	1	-	1	1	-	1	1	1	1	1	-
4267788	TGCAGTCGTACGACCAGTCCACCGTAAACGAACCACCCGAGATCGGAAGAGCGGTTCAGCAGGAATGCC	1	1	1	1	1	1	1	1	1	1	1	1	1	1	1	1	1	1	1	1	-	-	1	1	1	1	1	1	0	1	-	1	1	1	1	-	1	1	1	1	1	1	1	1	1	1	1	1
4266918	TGCAGTCCCTGGGTTCCTGCGCCGCGCTCCATCTCCTCGAGCTGGCCTCGGCTCCGAGATCGGAAGAGC	1	1	1	1	1	1	1	1	1	1	1	1	1	1	1	1	1	1	1	1	1	1	1	1	1	1	1	1	1	1	1	1	1	1	1	1	1	1	1	1	1	1	1	1	1	1	1	1
4285358	TGCAGGGAGAGAAGCCCACGGGGACTCGCCCTTGAGTCTACCGAGATCGGAAGAGCGGTTCAGCAGGAA	1	1	1	1	1	1	1	1	1	1	1	1	1	1	1	1	1	1	-	0	1	1	1	1	1	1	1	1	1	1	1	1	-	1	0	-	1	1	1	1	1	1	1	1	1	1	1	1
4287571	TGCAGAAAACAAGTAATGGCTATGCTCTCCCGTCGGTTACCCCTCCCGCCGACCGAGATCGGAAGAGCG	1	-	1	1	1	1	1	0	-	0	-	1	1	1	1	1	1	1	-	0	1	1	1	1	1	1	1	1	1	1	1	1	-	1	1	1	1	1	1	1	1	1	1	1	1	1	1	-
4299533	TGCAGCTAAACTGCTAGAGTCTTCTGTTCGTCCTGACTGAAGCCGAGATCGGAAGAGCGGTTCAGCAGG	1	1	1	1	1	1	1	1	0	0	0	1	1	1	1	1	-	1	-	0	1	1	1	1	1	1	1	1	1	1	1	1	1	1	1	1	1	-	-	1	-	1	1	1	1	1	1	-
4304992	TGCAGCCTGGAGTGCTACAAAGCTGTCCGCGGGAGCGCTTGATTTTGAGGACGCCGAGATCGGAAGAGC	1	1	1	1	1	1	1	1	1	1	1	1	1	1	1	1	1	1	1	1	1	1	1	1	1	1	1	1	1	1	1	1	1	1	1	1	1	-	1	1	1	1	1	1	1	1	-	1
4285096	TGCAGACAGGATCAGAGATATCCAGGTTCCTAGATTCAGCGCGAGTTAAAGATGTGGCTTACCGAGATC	1	-	1	1	-	1	1	1	1	0	0	1	1	1	1	1	1	1	-	1	1	1	1	1	-	-	1	1	0	0	-	1	1	1	1	-	1	1	1	1	1	-	1	1	1	1	1	1
4326409	TGCAGCTGCGAAGACCAAGGAACCGAGCCGAGATCGAAAGAGCGGTTCAGCAGGAATGCCGAGACCGAT	1	1	1	1	1	1	1	1	1	1	1	1	1	1	1	1	1	1	1	1	1	1	1	1	1	1	1	1	1	1	1	1	1	1	1	1	1	1	1	1	1	1	1	1	1	1	1	1
4283778	TGCAGCCGTCGCAGCAGCTCACGTTCACCTTCAAATCGACTCTCTGCACACACCACCACCAACAAAAAC	-	-	1	1	1	1	1	1	1	1	1	1	1	1	1	1	-	-	1	1	1	1	1	1	-	0	1	1	1	1	1	1	1	1	1	-	1	1	1	1	1	-	1	1	1	0	0	1
4277144	TGCAGCAGCATTGCGCACACCACGAGCGCCACCGCCATGGAACCGAAGGACGCCATTGCCGCTGCTCTC	-	1	1	1	-	1	1	1	0	0	0	1	1	1	1	1	1	1	1	0	1	1	1	-	-	1	1	1	1	1	1	1	1	1	1	1	1	1	1	1	1	1	1	1	1	-	-	1
4289565	TGCAGGGCCACATCAACTCGATGCTTCATTTCGCCGCGGGGCTCCTCGACGCCGAGATCGGAAGAGCGG	1	-	1	1	-	-	1	1	1	1	1	-	-	1	1	1	1	1	1	1	1	1	1	1	1	0	-	1	-	1	1	0	1	1	-	1	1	1	1	1	1	1	1	1	1	1	1	1
4269545	TGCAGCACGACATGGACGCGCTCCAGAAGCAGGTGACGCAGTCGCCGAGATCGGAAGAGCGGTTCAGCA	1	1	1	1	1	1	1	1	1	1	1	1	1	1	1	1	1	1	1	1	1	1	1	1	1	1	1	1	1	1	1	1	1	1	1	1	1	1	1	1	1	1	1	1	1	1	1	1
4301250	TGCAGAGTCCCTGTCTTGCTTATCGTCATATGCTAGTTATGCTTGCACCGAGATCGGAAGAGCGGTTCA	1	-	1	1	-	1	1	0	1	1	1	1	1	1	1	1	-	1	0	1	1	1	1	1	1	1	1	1	1	1	1	1	1	1	1	1	1	1	1	1	1	1	1	1	1	-	1	1
4268080	TGCAGAGAGGGCCTCTTCTTCATCGCAGGCCGCCCGAGGCCCGAGTTCCTCCTGGACAAACTCGCATCC	1	1	1	1	-	1	1	1	1	1	1	1	1	1	-	1	1	1	-	1	1	1	1	-	1	1	1	1	1	1	1	1	1	1	-	-	1	1	1	1	1	1	1	1	1	1	1	1
4280986	TGCAGATTCTTCCACTAGTAGGGGAATTTGCTCGAGCACTTTGCTCGACAGGTACGCGGCGGCAGTTGG	-	1	1	1	1	1	1	1	1	1	1	0	1	1	1	1	1	1	-	-	1	1	1	1	1	1	1	1	1	1	1	0	1	1	0	0	1	1	1	1	1	1	1	1	1	-	1	0
4294681	TGCAGCGGGATCAAGCTCAGGAACATCAGGCTGATGTACCGAGATCGGAAGAGCGGTTCAGCAGGAATG	1	1	1	1	-	1	1	1	0	1	-	1	1	1	1	1	1	1	1	-	1	-	1	1	0	1	1	1	1	1	1	1	1	1	1	1	1	1	-	1	1	1	1	1	1	1	1	1
4269571	TGCAGAGGGAACTCGAGGGGCACGCCGAAGGCGGCCATGAGGAGGATGAGGCCGCGGGCGTCCCTGGCG	1	1	1	1	-	1	1	0	1	1	1	1	1	1	1	1	1	1	1	0	1	1	1	1	1	1	1	1	-	-	-	1	1	1	1	0	1	1	1	1	1	1	-	1	1	0	1	1
4268826	TGCAGTGTGAGAAAGAACGGCACGGACACGTACGTTGGCTCCGAGATCGGAAGAGCGGTTCAGCAGGAA	-	1	1	-	1	1	1	1	1	-	1	1	1	-	1	1	1	1	-	-	1	1	1	1	-	1	1	-	1	1	1	1	1	1	1	1	1	1	1	1	1	-	1	1	1	1	1	1
4284772	TGCAGCTAGGCAGAATCATCGGGTCATTTTCTGAGCCGAGATCGGAAGAGCGGTTCAGCAGGAATGCCG	1	1	1	1	1	1	1	1	1	1	1	-	1	1	1	1	1	1	-	-	1	-	1	1	1	1	1	1	1	1	1	1	1	1	1	1	1	1	1	1	1	1	1	1	1	1	1	1
4289893	TGCAGCTGCTAATGGACTCCATCTCCATGGGCGACGACGATGTTACTCGCTTCTCCGAGATCGGAAGAG	1	1	1	1	-	1	1	1	1	1	1	0	1	1	1	1	1	1	1	-	0	1	1	1	1	1	1	1	1	-	1	1	0	1	1	1	1	1	1	1	1	-	1	-	1	1	1	1
4274260	TGCAGCTTCAGCCAGAAACGTTATCACGGCAGCAAAACAGCCGAGATCGGAAGAGCGGTTCAGCAGGAA	1	-	1	1	1	1	1	1	0	0	0	1	1	1	1	1	1	1	1	1	1	1	1	1	1	1	1	1	1	1	1	1	1	1	1	1	1	1	1	1	1	1	1	1	1	1	1	1
4316426	TGCAGGCATTATTATGTCACCATGAGCATTGAGGATCCGAGATCGGAAGAGCGGTTCAGCAGGAATGCC	1	1	1	1	1	1	1	1	1	1	1	1	-	1	1	1	-	1	1	1	1	1	1	1	1	0	1	1	-	1	1	1	0	1	1	-	1	1	1	1	1	1	1	-	1	0	1	-
4273404	TGCAGGGGCAGCGCGATGTGTGGGTGCACAGTCGCCGAGATCGGAAGAGCGGTTCAGCAGGAATGCCGA	1	-	1	1	1	1	-	1	1	1	1	1	-	1	1	1	-	1	1	1	1	-	1	1	1	-	1	1	0	1	1	1	1	1	1	-	1	1	1	1	1	1	1	1	1	0	1	-
4291055	TGCAGGCGCACTTGGTGCAGTTGCAAAAGGATCAGATTTTGCATGTATCAATCACATACCGAGATCGGA	1	1	1	1	1	1	1	1	1	1	-	-	1	1	1	1	-	1	0	0	1	1	1	1	1	-	1	1	1	1	1	1	1	1	1	-	1	1	1	1	1	1	1	1	1	-	-	1
4288254	TGCAGAGGTCCTCCACGGCGTGCCAGGAGTCCACCAACAAGCTCGCCCTCAGCTTCAACAAGCAGGCCG	1	1	1	1	1	1	1	1	1	1	1	1	1	1	-	1	1	1	1	-	1	-	1	1	1	1	1	1	1	1	1	1	1	1	1	1	1	-	1	1	1	-	1	1	1	1	1	1
4308827	TGCAGGCTCAGTGCAGGGCGTTTTTCTTGCTCATCGCCGAGATCGGAAGAGCGGTTCAGCAGGAATGCC	1	1	1	-	1	1	1	-	1	1	1	-	1	1	1	1	-	1	0	1	1	1	1	1	1	0	1	-	1	1	1	1	1	1	1	1	1	1	1	1	1	1	1	1	1	1	1	1
4284760	TGCAGGAGCGGGACGGCGTGCAGCTCCCCGGCCTCTTCCCGCCGAGATCGGAAGAGCGGTTCAGCAGGA	-	-	1	-	1	1	1	1	-	-	1	1	1	-	1	1	1	1	1	1	1	1	1	1	1	1	1	0	1	1	-	0	1	1	1	1	1	1	1	1	1	1	1	1	-	1	1	1
4264306	TGCAGCAGCTGTTCCTCGACGACAACAGCTTCGATGGGGAGCTGCCGAGATCGGAAGAGCGGTTCAGCA	1	-	1	1	-	1	1	0	1	1	1	1	1	1	1	1	1	1	1	0	1	1	1	1	1	1	1	1	1	-	-	1	1	1	1	1	1	1	1	1	1	-	1	1	1	1	1	1
4293708	TGCAGAGGAAGACGCACGCAACGGCTGTCCTCCCAAATTCCGAGATCGGAAGAGCGGTTCAGCAGGAAT	1	1	1	1	-	1	1	1	1	1	1	-	1	1	1	1	1	1	1	1	1	-	1	-	-	1	-	-	1	1	1	1	1	1	1	1	1	1	1	1	1	1	1	1	1	0	1	1
4273330	TGCAGCGCGCTTCAGAGTGTGCGCCCCGAGATCGCAAGAGCGGTTCAGCAGGAATGCCGAGACCGATCT	1	-	1	1	1	-	1	1	1	1	1	1	1	1	1	1	1	1	1	1	0	-	1	1	1	1	1	1	1	-	1	1	-	1	-	1	1	1	1	-	1	1	1	1	1	1	1	1
4293433	TGCAGCCTTTAGCAAAACTTGATCAACAGCGGCCGTCTCCTCCACCGCCGAGCTGGGCTTGGCGATCCG	1	1	1	1	1	1	1	1	1	0	1	0	1	1	1	1	1	1	-	1	1	1	1	0	1	-	1	1	1	1	1	1	1	1	1	-	1	1	1	1	1	1	1	1	1	1	1	-
4293239	TGCAGGAGACAAAGACGAGCTACACGAAGCATCAGGCAGCAAAGTCATGTCATATTTGCGCATGCGATC	1	1	1	1	-	1	1	1	-	0	1	-	1	1	1	1	1	1	1	0	0	1	1	1	1	1	1	0	1	1	1	1	1	1	1	-	1	1	0	1	1	1	-	-	1	1	1	1
4304302	TGCAGATCTTCGAGCTGAGATCAGGTCCGCCACCAGATTCGGTGGGGAGGACCGAAGATTCCTCAGCTA	1	1	1	1	1	1	1	1	0	0	0	1	1	1	1	1	1	1	-	1	1	1	1	1	1	-	1	1	1	1	1	1	1	1	1	-	1	1	1	-	1	1	1	1	1	1	-	1
4283686	TGCAGGGGCCTGGGCGATGAAGACTCCGACGAGCAGCGCCAGTGCAAGCGCCGAGATCGGAAGAGCGGT	1	-	1	1	-	-	-	-	1	1	1	1	1	1	1	1	1	1	1	1	1	1	1	1	1	1	1	1	1	1	1	1	1	1	1	1	1	1	1	-	-	1	1	1	1	1	1	-
4281260	TGCAGCTCACAGTACCAACTGGGCCAACCAGCCACCGAGATCGGAAGAGCGGTTCAGCAGGAATGCCGA	1	-	1	1	1	1	1	1	1	1	1	1	1	1	1	1	0	1	1	1	1	1	1	1	1	0	1	1	1	1	-	1	1	1	1	-	1	1	1	1	1	1	1	1	1	1	1	1
4328740	TGCAGCCGTGGCAGGTTTATCCTGTGCTATTTCGAAACCCGAGATCGGAAGAGCGGTTCAGCAGGAATG	-	-	1	1	1	1	0	1	1	1	1	1	1	1	-	1	1	1	1	1	1	1	1	1	1	0	1	1	-	1	1	1	1	1	1	1	1	1	1	1	1	1	1	1	1	-	0	0
4276833	TGCAGTGGGCGGCGCGGTCGGTTGCTGCTGGGCGATATAGCGGCGTACCGAGATCGGAAGAGCGGTTCA	1	1	1	1	1	1	1	-	-	0	-	1	0	1	1	1	1	1	1	-	1	1	1	1	1	-	1	1	1	1	1	-	1	1	1	-	1	1	1	1	1	1	1	1	1	1	1	1
4298471	TGCAGCGCCACCCACTTGCCGCTGCCGCGTGGCACCTTTGCCTGCGTGATGTACATGGTGACCGAGATC	-	-	1	1	1	-	1	1	0	0	1	1	1	1	1	1	1	1	1	-	1	1	1	1	1	1	-	1	1	1	1	1	1	1	-	1	1	1	0	1	1	1	1	1	1	1	1	1
4267178	TGCAGTTCACCTTGAGTGCGAGAGGAAAGATTCCTGAGGCGGATTAGTTGCCGAGATCGGAAGAGCGGT	1	1	1	1	-	1	1	1	1	1	1	1	1	1	1	-	-	1	-	1	1	1	1	1	-	1	1	1	1	1	-	1	1	1	1	1	1	1	0	1	1	1	1	1	-	1	1	1
4297067	TGCAGCCGCACGATCCCCCGCAGCGCCTTCAGCGCCCGCCTCGCCTGATCAACCGCGCGACAGATCATC	1	1	1	1	1	1	1	1	1	1	1	1	1	1	1	1	1	1	1	1	1	1	1	1	1	0	1	-	1	1	-	1	1	1	-	1	1	1	1	1	1	1	1	1	1	1	1	1
4281117	TGCAGCGACAAGCGCGGCGACGGCGTCGTCCAGCCCGTGCTGCCGCCGAGATCGGAAGAGCGGTTCAGC	1	1	1	1	1	-	1	1	1	1	1	1	1	1	1	1	-	1	1	1	1	1	1	1	1	1	1	1	1	1	0	1	1	1	1	1	1	1	1	1	1	1	-	1	1	1	1	-
4285819	TGCAGGAGATGGTGGAGAGTGATCGTGCACTCCATCCTTGGAGCCGAGATCGGAAGAGCGGTTCAGCAG	1	1	1	1	1	-	1	1	1	1	1	1	1	1	1	1	1	1	1	1	1	1	1	1	1	1	1	-	1	1	1	1	1	1	1	-	1	1	1	1	1	1	1	1	1	1	1	-
4276937	TGCAGAGTATCACGTAGGAAGCCAAGATTAACGTCCGAGATCGGAAGAGCGGTTCAGCAGGAATGCCGA	1	1	1	1	1	1	-	1	1	-	1	1	1	1	1	1	1	1	1	-	1	1	1	-	1	-	1	1	1	1	1	1	1	1	1	1	1	1	1	1	1	1	1	1	1	1	1	1
4277146	TGCAGCTGCTGGCCATGGGCACCAGGCCTGGCGTCGCTGCGGCCGTAGCCGCGCTGCTGTTCGCCGAGA	1	1	-	1	-	1	1	0	-	1	1	-	0	1	1	1	1	1	1	-	1	1	1	1	1	1	1	1	1	1	1	-	1	1	1	-	1	1	1	1	1	1	1	0	1	1	1	1
4299449	TGCAGTTCCTCCTAATATTGCAAATGATGGTGCACCGAGATCGGAAGAGCGGTTCAGCAGGAATGCCGA	1	1	1	1	-	1	-	1	1	1	1	1	-	1	1	1	1	-	0	0	1	1	-	1	1	1	1	1	1	1	1	1	1	1	1	1	1	1	1	1	1	1	-	1	1	1	-	0
4289852	TGCAGGCCCGTCCTCAGGAGGCGGCCGAAGAAGGCAAGCCCTAGGTCCGAGATCGGAAGAGCGGTTCAG	1	0	1	1	1	1	1	1	1	1	1	1	1	1	1	1	1	1	1	1	1	1	1	1	1	1	1	1	1	-	1	1	1	1	-	1	1	1	1	1	1	1	1	1	1	1	1	1
4303487	TGCAGGCCTGGTCCTTTCCCTGCATGCTCTGAGCGGACCGAGATCGGAAGAGCGGTTCAGCAGGAATGC	1	-	1	1	1	1	1	-	-	-	0	0	1	1	1	1	-	1	1	0	1	1	1	1	1	0	1	1	1	1	1	1	1	1	1	1	1	1	1	1	1	1	1	1	1	1	-	1
4304858	TGCAGGAAGCTTCAGTAGAGTATAGGGTTATTGTTGGCGTCTCGTACGTGCGGGTGGGCGCGGCTGTCC	1	-	1	1	1	1	-	-	1	1	1	1	1	1	1	1	1	1	-	1	1	1	1	1	-	-	1	1	1	1	1	1	1	1	1	1	1	1	1	1	1	1	1	1	1	1	1	1
4285716	TGCAGCAGAAGGACGTGCTGAGGGCCTTCATCGAATCGAGGGCCCAGACGCGCGCGAGCGGGCCGAGAT	1	1	1	1	1	1	1	0	0	0	0	1	1	1	1	1	-	1	1	1	1	1	1	1	1	1	1	1	1	1	-	1	1	1	1	1	1	1	1	1	1	1	1	1	1	1	1	1
4298986	TGCAGACTTTTCTCCAGCCGCACCCCACTCCTTTCTTTTTCTCTTTTTAGCCAGGTGGCCAGCCGAGAT	-	1	1	1	1	1	1	0	1	1	-	1	1	-	1	1	-	-	1	1	1	1	1	1	1	-	1	1	1	1	1	1	1	1	1	1	1	1	1	1	1	-	1	1	1	1	-	-
4273456	TGCAGGCCTTGTACATGGCCAAGTGTGCGCCGGGAGCGATGCCGAGATCGGAAGAGCGGTTCAGCAGGA	-	1	1	1	1	-	1	-	0	0	0	1	1	1	1	1	1	-	1	0	1	1	1	1	1	1	1	1	1	1	1	-	1	1	1	1	1	1	1	1	-	1	1	1	1	1	1	0
4272471	TGCAGCAGGGCCCTGTGCTGATCGGCGAGCCTGTCCCGAGATCGGAAGAGCGGTTCAGCAGGAATGCCG	1	-	1	1	1	1	1	1	1	1	1	1	1	1	1	1	1	1	1	1	1	1	1	1	1	1	-	1	1	-	0	1	1	1	1	1	1	1	1	1	1	1	-	-	1	-	1	1
4290399	TGCAGAGACGACGCATGGCCTCGACGACAGCGGCGGTGCCGAGATCGGAAGAGCGGTTCAGCAGGAATG	-	-	1	1	1	1	1	-	1	1	1	1	1	1	1	1	1	-	1	1	1	1	1	1	1	1	1	1	1	1	0	1	-	1	-	0	1	1	1	1	1	1	1	-	1	1	-	1
4286849	TGCAGAACACGCATCGAGTGTCGTGTCCAGCGATGGACAGCAATATACAATGAGCCGCACAGAAACCCG	1	-	1	1	-	1	1	1	1	1	1	1	1	1	1	1	1	1	1	1	1	1	1	1	1	1	1	1	1	1	0	1	1	-	1	1	1	1	1	1	1	1	1	1	1	-	1	1
4274209	TGCAGAGCTCGACGATGTCCCGCGCCTCCCCCGCGGCCTCCTCTTCCTCGGAGAACGCGCACCCCATGA	1	1	1	1	1	1	1	0	1	1	1	1	1	1	1	1	1	1	0	-	1	1	1	1	1	1	1	1	1	1	1	1	1	1	1	-	1	1	1	1	1	1	1	1	1	1	1	1
4271455	TGCAGGGCACCTTTGTCGGCGTCTATGATGGCCATGGTGGACCGAGATCGGAAGAGCGGTTCAGCAGGA	1	1	1	1	1	1	1	-	1	1	1	1	1	1	1	1	-	1	1	-	1	1	-	0	1	-	1	1	1	1	1	1	1	1	1	1	1	1	1	1	1	1	1	-	1	0	1	1
4276358	TGCAGGGCGCTTGGGCTGGGTGCGGCGCACCAGCAGCACGTCTCCGTGACTGGCCTGGACCTCGTAGAT	-	-	1	1	1	1	1	1	1	1	1	1	1	1	1	1	1	1	1	1	1	1	1	1	1	1	1	-	1	-	1	-	1	1	1	1	1	1	1	1	1	1	1	1	1	1	0	0
4302612	TGCAGCAAACAGAGCAGTTGGACGCCATCTTTTGGGGTTGCAGTTCCTTCCGAGATCGGAAGAGCGGTT	1	1	1	1	1	1	1	1	1	1	-	0	-	1	1	1	1	1	1	1	1	1	1	1	1	0	1	-	1	1	1	-	-	1	-	-	1	0	0	1	1	1	-	-	1	1	1	1
4279379	TGCAGCGCGTATCTAAACATCCCAGAGCCAGGGGGCATACCTAGTCTCTGGGCACATGCCACCATCGCC	1	1	-	1	-	1	1	1	1	1	1	1	1	1	1	1	-	1	1	1	1	1	-	1	1	1	1	1	1	1	1	1	1	1	1	-	1	1	1	1	1	1	-	1	1	1	1	0
4298790	TGCAGCCTTCCGTTGCCCTGCACCCTAGGGTTCATGAAGTCTTCGGCGAGGAGGTCGACGAGGGCCATG	1	1	1	1	1	1	1	1	1	1	1	1	1	1	1	1	1	-	1	1	1	1	-	1	1	1	1	1	1	1	0	1	1	1	1	1	1	1	1	1	-	1	0	1	1	0	0	-
4265281	TGCAGCAGCTAGTTACCCCGAAGAACTTGAGAAGCGGGCACAAGAACGACAAGACGCTGCTGCTGGCGG	1	1	1	1	-	1	1	-	1	1	1	1	1	1	1	1	1	1	1	1	1	1	1	-	1	0	1	1	1	1	1	1	1	1	1	1	1	1	1	1	1	1	1	1	1	-	-	1
4274076	TGCAGGCCTGTGATTGACCAGAACTTCTACTATGTGGGTCTGAAGTACACCGAGATCGGAAGAGCGGTT	1	1	1	1	1	1	1	1	1	1	1	-	1	1	1	1	-	1	1	1	1	-	1	1	-	1	1	1	1	1	1	1	1	1	-	1	1	1	1	1	1	-	-	1	1	0	1	1
4284335	TGCAGCTCTTCTGCGGTGACACCCTCCTGCTCAAGGGCAAGAAGCGGAAAGACACGGTCTGCATTGCGC	1	-	1	1	1	1	1	1	0	0	0	1	1	1	1	1	1	1	-	0	1	1	1	1	-	1	1	1	1	1	1	1	1	1	-	1	1	1	1	1	1	1	-	1	1	1	-	1
4278784	TGCAGATTTGGATGGGCTGCCTGGCCCACGCAGCGGACAGCGGTGGTTCGAGCAACTCCTCGACGCAGG	1	-	1	1	-	1	1	1	1	1	1	0	1	1	1	1	1	-	-	1	0	1	1	1	1	1	1	-	1	1	1	1	1	1	1	1	1	1	1	1	1	1	-	-	1	1	1	1
4274975	TGCAGAGCGTGACACTGATCCCGTCGGTTTGATTTTGCTGGCCCTCGTTCAGATTGTAAGAGCCGAGAT	1	1	1	1	1	1	1	1	1	1	1	0	0	1	1	-	1	1	-	1	-	1	1	0	1	1	1	1	1	1	1	1	1	1	1	1	1	-	-	-	1	1	-	1	1	1	0	1
4296247	TGCAGAGGAGCCGAACCCCATGGCCAGAGGGAATTGTCCCCGAGATCGGAAGAGCGGTTCAGCAGGAAT	1	0	1	1	1	1	1	1	1	1	1	-	1	1	1	1	1	1	0	1	1	1	1	1	1	-	1	1	1	1	-	1	1	1	1	1	1	0	1	1	1	1	1	1	1	0	1	1
4271322	TGCAGTCCAAAAGGAGAGCGACGTTGTATACAAGAGCAGTGGTCAAGATCCGAGATCGGAAGAGCGGTT	1	1	-	1	1	1	1	1	-	0	1	1	1	1	1	-	1	1	1	-	1	0	1	1	1	1	1	1	-	1	1	1	1	1	1	1	1	1	1	1	1	1	1	1	1	1	1	1
4309860	TGCAGCGTGTGAGGTGCGCAAGAGCATTTTTGCACCGAGATCGGAAGAGCGGTTCAGCAGGAATGCCGA	1	-	1	1	-	1	1	0	1	1	1	1	0	1	1	1	-	1	-	-	1	-	1	1	1	1	1	1	1	-	1	1	1	1	1	-	1	1	-	1	1	1	1	1	1	1	-	1
4296289	TGCAGATGCATCCGCTGATCCACACGTACGACCAATGCATGCATGGTACCTCTCTCAGCCCGAGATCGG	1	1	1	1	1	1	1	1	1	1	0	-	1	1	1	1	1	1	1	1	1	1	1	1	-	1	-	-	1	1	1	1	1	1	1	-	1	1	1	1	1	1	1	1	-	1	-	-
4286373	TGCAGATCCGACCACCATATCCATGATTATCACCTTCCCTCCGAGATCGGAAGAGCGGTTCAGCAGGAA	1	1	1	0	1	1	0	1	1	1	1	1	1	1	1	1	1	1	-	1	1	1	1	1	1	-	1	1	1	1	-	1	1	1	1	1	1	1	-	-	1	-	1	1	1	0	0	-
4292029	TGCAGCGCCAGCGCGCGCCGCATGTTGCCCACCGCCGAGATCGGAAGAGCGGTTCAGCAGGAATGCCGA	-	-	1	-	1	1	1	1	1	1	-	1	1	1	1	1	1	1	1	1	1	1	1	1	1	1	-	1	1	1	-	1	1	1	0	-	1	1	1	1	1	1	1	1	1	1	0	1
4274790	TGCAGACCAATTGTCGTGACCAGTCAATCGCATTCCATTCTGCCCCATTTGCATAAGGAGCTGGCTGCC	1	1	1	1	1	1	1	-	1	1	1	1	-	1	1	-	1	1	1	0	1	1	1	1	1	1	1	1	0	-	-	1	1	1	1	1	1	1	1	1	1	1	1	1	1	0	1	1
4292143	TGCAGCCACCTTTGCCGAGAAACTCGGCGGACACGCGCAGCAGTTCCTCCGAGATCGGAAGAGCGGTTC	1	-	1	-	1	1	1	1	1	0	0	1	1	-	1	1	1	1	-	1	1	1	1	1	1	1	-	1	1	1	1	1	1	1	1	1	1	1	1	-	1	1	1	1	1	0	1	-
4300092	TGCAGTCCGACGTCCAGTTCAAGATGGTCCGCGACATGCAGACCAACATCAGGAAGATCGTCAACCTCG	1	1	1	1	1	1	1	1	1	1	1	1	1	1	1	-	1	-	1	1	1	1	1	0	1	1	1	1	1	1	-	1	1	1	1	1	1	1	1	1	-	1	1	-	1	0	1	1
4303531	TGCAGAGTTTGGACCTTTCCGGCAACCAGCTCTCCGGGAGAATCCCTCCTGGTCTCGGGGACTGCTCGC	1	1	1	1	0	1	1	1	1	1	1	1	-	1	-	-	1	1	1	1	1	1	1	1	1	1	1	1	1	1	0	1	1	1	1	1	1	0	1	1	1	1	0	-	1	1	-	1
4271401	TGCAGAGGGAGGGAGAGTCGCCGCCTATTAATACGCGGCCTCCTCCGCCCCGAGATCGGAAGAGCGGTT	1	1	1	1	1	1	1	1	1	1	1	1	1	1	1	1	-	1	1	1	1	-	1	1	1	1	1	1	1	-	1	1	1	1	1	1	1	1	1	1	1	1	1	-	1	-	1	1
4292489	TGCAGCACAAGGCGCGAGGACGTTACGCCCGCTTGCAGCCGAGATCGGAAGAGCGGTTCAGCAGGAATG	1	1	1	1	1	1	1	1	1	1	1	1	-	1	1	1	1	1	1	0	1	1	1	-	1	-	1	1	0	1	1	1	1	1	1	1	1	1	1	1	1	1	1	1	1	1	1	1
4299764	TGCAGAGACCGACCACACGGTCGAGGGCAAGCATGCACCGAGATCGGAAGAGCGGTTCAGCAGGAATGC	1	1	1	1	1	1	1	-	0	1	0	1	1	1	1	1	1	1	1	0	1	1	1	1	1	-	1	1	1	-	0	1	1	1	1	1	1	1	1	1	1	1	1	1	1	1	1	1
4280547	TGCAGAAGCAGGATTCACTTGCTTTCCCTCTAACCCCGAGATCGGAAGAGCGGTTCAGCAGGAATGCCG	1	-	1	1	1	1	1	1	1	1	1	0	1	1	1	1	1	1	1	1	1	1	1	1	-	1	1	1	1	1	0	1	1	1	1	1	1	1	0	1	1	1	1	1	1	1	1	1
4286300	TGCAGAAACTCCAAAGAGGAGGAAATGCCATGACAATGGCCGTGTTGGTTGATTTGTCGGAGTCCACCC	1	-	1	1	1	1	1	1	1	1	1	1	1	1	1	1	1	1	1	1	1	1	1	1	1	1	1	1	1	1	1	1	1	1	-	1	1	1	1	-	1	1	1	1	1	1	1	1
4265185	TGCAGCTCTTCATGAACAACTTCACCGGCCGCGTCCCGAGATCGGAAGAGCGGTTCAGCAGGAATGCCG	1	1	1	1	1	1	1	1	1	1	-	1	1	-	1	1	1	1	1	1	1	1	1	1	-	1	1	-	1	1	1	0	1	1	-	1	1	0	1	1	1	1	1	-	1	1	0	1
4291988	TGCAGCACTGGGACGACAACCCACTGCGCCTCCATCGCGGTGAGCTTGATCGGCCCCGAGATCGGAAGA	-	1	1	1	1	1	1	1	1	1	1	-	1	1	1	1	1	1	1	-	1	1	1	0	1	1	1	1	1	1	1	1	-	1	-	1	1	1	1	1	1	1	1	1	1	-	1	1
4301095	TGCAGGTTTGTTTCTGCAAAGGATTTCGATTCGGCTCTAGTACAAAAAATCAACCATGACCGAGATCGG	1	0	1	1	1	1	1	1	1	1	1	1	-	1	-	1	1	1	1	1	1	1	1	-	1	1	1	-	1	-	1	1	1	1	1	1	-	-	1	1	1	1	1	1	1	1	1	1
4292197	TGCAGCTTGCGCACCAACTATCAGAGAAACATATTCTCAGAACACAGACGTTACTGTGCGACATGCTAC	1	1	1	1	1	1	1	1	1	1	0	1	-	1	1	-	1	1	-	1	1	1	-	-	-	1	1	1	1	-	0	1	1	1	1	1	1	-	1	-	1	1	1	1	1	1	1	1
4276148	TGCAGGAGGCCCTGGACAAGCTCCGAGATCCGAAGAGCGGTTCAGCAGGAATGCCGAGACCGATCTCGT	0	1	1	-	1	1	1	1	-	1	1	1	1	1	1	1	1	1	1	1	1	-	1	0	-	1	1	1	1	0	1	1	1	1	1	1	1	1	1	-	0	1	1	1	1	1	1	1
4276973	TGCAGCATGAGCTCGTAGTTCTTGTGCCCCTTGGAGATGGTCTGCCCAGGCCGCTTCCCCTCAGGCGTG	1	1	1	1	1	1	1	-	1	1	-	1	1	1	1	1	1	1	1	-	1	1	1	-	1	1	1	-	1	1	1	1	1	1	1	1	1	1	1	1	1	1	1	1	1	1	1	1
4285977	TGCAGAACGACGGCGTGGTCAACCCCGAGGCCATCATGAGCCAGGCCATCGCCGAGATCGGAAGAGCGG	1	1	1	1	1	1	1	1	1	1	1	-	1	1	1	1	-	1	1	1	1	1	1	1	1	0	1	1	1	1	0	1	1	1	1	1	1	-	-	1	1	1	1	1	1	1	1	1
4276261	TGCAGAAAGACTCGTTTTTTCAGTTCTTGCGGGAAGAACAATCAAGCAAGCAAACGGCCATACCTCCGA	1	-	1	1	-	1	1	1	1	1	1	1	1	1	1	1	1	1	-	1	1	1	1	1	1	1	1	1	1	1	1	1	1	1	-	-	1	0	1	1	1	1	1	1	1	-	1	1
4272708	TGCAGTGCGGGAAGAGCTCCAGGTAAGATTGCACGAATGTGATTGCTAGCCTGGTCTTGCCGAGATCGG	-	-	1	1	1	1	1	1	1	-	1	1	-	1	1	1	1	1	1	1	1	1	1	1	-	1	1	1	1	-	1	1	1	1	1	0	1	1	1	0	1	1	1	1	-	1	1	1
4289828	TGCAGACGGAGGCGCAGAGCTTCGACGTGCCCAGCGCCGACATGATCTACAGCCTCGCCTACCTGCCGC	-	1	1	1	1	1	1	1	1	1	1	1	-	1	1	-	1	-	-	1	1	-	1	1	-	1	-	1	1	1	1	1	-	1	-	0	1	1	1	1	1	1	1	1	1	1	-	1
4294276	TGCAGGCTGCTGACCTCGAGCGCGGCAGCGCCAAGATCTCCGAGGAGGACACCGACGATGATCACGACG	1	1	1	1	1	1	1	1	1	1	1	1	1	1	1	1	-	1	1	-	-	1	1	-	-	1	1	1	1	1	0	1	1	1	1	1	1	1	-	1	1	0	-	1	1	1	-	1
4263980	TGCAGCAACACCACAACCCACTCTCGACTCTAGCTGCGAGTGATGGACACCGTTGCCGCCTGGCCGCAG	1	1	1	1	1	1	1	1	1	-	1	1	1	-	1	1	1	1	1	1	1	1	1	-	-	-	1	1	1	-	1	1	1	1	1	1	1	1	-	1	1	1	1	1	1	-	1	1
4280969	TGCAGGGGTTGCCATATGAAGTCATCTTGTTGTCGTCGTATATCGTAGCCGAGATCGGAAGAGCGGTTC	1	1	1	1	1	1	1	1	1	1	1	-	-	1	1	1	-	1	-	-	-	1	1	1	-	1	1	1	1	1	1	1	1	1	1	1	1	1	1	1	1	1	1	1	1	0	1	-
4269702	TGCAGGTTCCTCTCGAACTCCCTCAGGTAGTCCAGGAGCAAAACGATCACGAAGAGGATGAACCCACCG	1	1	1	1	1	1	1	1	0	-	-	1	-	1	1	-	1	0	-	1	1	1	-	-	1	1	1	1	1	1	1	1	1	1	1	1	1	1	1	1	1	-	1	1	1	1	1	-
4278725	TGCAGTCCTGTTGTATCGGCCGCCTATTGTCGACGCGCAGAGTCATGTTCGATTCCGAGATCGGAAGAG	1	0	1	1	1	1	1	1	-	1	1	1	1	1	1	1	1	1	1	-	1	-	-	1	1	1	1	1	1	1	1	1	1	1	1	1	1	0	0	1	1	1	1	1	1	0	-	1
4273584	TGCAGTATGAGGGTGGTGCAATGGAGGGGGGCAGGGGATCAAGCATCTGGGACAACTTCACTCACCGAG	1	1	1	1	1	1	1	1	1	1	1	-	1	1	1	1	1	-	1	1	1	1	1	1	1	1	1	-	-	1	1	1	1	1	-	1	1	1	1	1	1	1	1	1	1	1	0	-
4266641	TGCAGCTGTCCCAGCTTATGTGCATCCTCCTGTGGTCCGATGAGCATCTCGCAGATGGCCCTGAAGGTG	1	-	1	1	-	1	1	1	1	1	1	1	-	1	1	1	1	1	1	1	1	1	1	1	-	1	1	1	1	1	0	1	1	1	1	0	1	1	1	1	1	1	1	1	1	1	0	1
4300728	TGCAGATGCGGCCGATGGCTGTTGACGATTTGGTCTGGCCGTGACAGCAACTGTGACGAGGCGGCGGTT	1	1	1	1	1	1	1	1	1	1	1	1	0	1	1	1	1	1	1	1	1	1	1	-	1	-	1	1	1	1	1	1	1	1	-	0	1	1	1	1	1	1	1	1	1	1	1	1
4300114	TGCAGGAAGAGGACCTGAAGCAGTTCAGGCAGTGGGGAAGCTCCACCCCGAGATCGGAAGAGCGGTTCA	1	-	1	1	1	1	1	1	1	1	1	1	1	1	1	1	-	1	1	1	1	1	-	1	1	-	-	1	1	1	1	1	1	1	1	1	1	1	1	1	1	1	1	1	1	0	1	1
4286676	TGCAGTGATCCATGCCGACGACATCGAGATATCGCTGTGCGACGGCAACTCGGAGGACGAGCGCCGCCG	1	1	1	1	-	-	1	1	1	1	1	1	1	1	1	1	1	1	-	-	1	1	1	-	-	1	1	1	1	1	1	1	1	1	1	1	1	1	1	-	1	1	1	1	1	0	0	1
4285571	TGCAGTGCACCCAGCAAGTTTGACCAATGATTTTTTATTAGCGCCGAGATCGGAAGAGCGGTTCAGCAG	-	1	1	1	1	1	1	-	1	1	-	1	1	1	1	-	-	1	-	1	1	1	1	1	1	1	1	1	1	1	-	1	1	1	1	1	1	1	1	1	1	1	1	1	1	1	1	0
4285750	TGCAGGCCAGGTCCTGGTCGATCGATTTGCTACGGTGACTGGGTAACCTTCCTGCTACTGAGTAGTGAC	1	1	1	0	1	1	1	-	1	1	-	1	1	1	1	1	1	1	1	1	1	0	1	1	0	1	1	1	1	0	1	1	1	1	-	-	-	1	1	1	1	1	1	1	1	1	1	1
4274763	TGCAGGTGCAGGTACTGATGGGATAGTTAATATACTGCTGCTGAGATTACCGAGATCGGAAGAGCGGTT	1	0	1	1	-	1	1	1	1	1	1	-	1	1	1	1	-	1	1	1	1	1	1	1	-	1	1	1	1	1	1	1	1	1	1	-	1	1	1	1	1	1	1	-	1	1	0	1
4289654	TGCAGGTCGCTGCTGTAGTGCGTGGACTCGTCCAGCACGTGGTACGCCGTCTCCAGGCTCATCCTGAGG	1	-	1	1	1	1	1	1	1	1	1	1	1	1	1	1	1	1	1	-	1	1	1	1	-	1	-	1	1	-	1	-	1	1	1	0	1	1	1	1	1	1	1	1	1	1	1	1
4277182	TGCAGTCGGCGACGATGATGGCAGTGTCGTGCTGACCCCGCCAGCACTGCACGAGCATGAGAATGAAGG	1	1	1	1	1	1	1	1	1	1	1	-	1	-	1	1	1	-	1	1	1	1	1	-	1	1	1	1	-	1	1	-	1	1	1	0	1	1	1	1	1	1	1	1	-	0	1	0
4295820	TGCAGCGCTGTGCTCCTCCACAGCATCAGCGCCGCGCTCCTCCACCGCCGCCGAGATCGGAAGAGCGGT	1	1	1	1	1	1	1	1	1	1	1	1	1	1	1	1	1	1	1	1	1	1	1	1	1	1	1	1	1	1	1	1	1	1	1	-	1	1	1	-	1	1	1	1	1	1	0	1
4281063	TGCAGACGGGCAGGACCATGACCTACGACCTCCAAGACGCTATGCTGACGTTTGACACGTTCGAGACGG	1	1	1	1	1	1	1	0	1	-	1	-	1	1	1	-	1	1	1	-	1	1	1	-	1	1	1	1	1	1	-	1	1	1	1	1	1	1	1	1	1	1	1	1	-	-	1	1
4263431	TGCAGTTCTTGCATAGCAAACGTGACAAGACAATTCGATCTTACCAGTCTATTCACTGTAGAATTTGTT	-	1	1	1	-	1	1	1	1	1	1	0	1	1	1	1	1	1	-	-	1	1	1	1	1	-	1	1	1	1	1	1	-	1	1	0	1	1	1	1	1	1	1	1	-	1	0	1
4326974	TGCAGTAGCTTGGCCATAAGCGTGCGTGTGTGCACAACGTGCACAACCGAGATCGGAAGAGCGGTTCAG	1	1	1	1	1	1	0	1	1	1	1	1	1	1	1	1	1	1	0	1	1	1	1	1	1	1	1	1	1	1	1	1	1	1	1	1	1	1	1	1	1	1	1	1	1	1	1	-
4265078	TGCAGCACCGTGCCATTGCGCGGGAGGAACACCAGGTTGGTGAGCCCTGCGCCATGCACGCCCATGATC	-	1	1	1	1	1	1	1	1	1	1	1	1	1	1	1	1	1	0	0	1	1	1	-	1	1	1	1	1	1	1	1	1	1	-	1	1	1	1	1	1	1	1	1	-	0	-	1
4296502	TGCAGCTCGCCTCTCGTCTCCCTCGTTTCCTTTCCCCGAGATCGGAAGAGCGGTTCAGCAGGAATGCCG	1	-	1	1	0	1	1	-	1	1	1	-	0	1	1	1	1	1	1	1	1	1	-	-	1	1	1	1	1	1	1	-	1	1	0	1	1	1	1	1	1	1	1	1	-	1	1	1
4265380	TGCAGGAAGAACAAGTGAGGATTCATGGGGCGAACTGATGCGCGACATTGACCGAGATCGGAAGAGCGG	-	0	1	1	1	-	1	1	1	1	1	1	1	1	1	1	-	0	1	1	1	-	1	1	1	1	-	1	1	1	1	1	1	1	1	1	1	1	1	-	1	1	0	1	1	0	1	1
4328080	TGCAGGGCTGCTTTTTAATCACAAATTCACAAAGAAGAACAAGATATCAAACAATGGATGAATGCCCGA	1	1	1	1	1	1	1	1	1	1	1	1	0	1	-	-	1	0	0	1	1	1	-	1	0	1	1	1	1	1	1	1	1	1	1	0	-	1	1	1	1	1	1	1	1	1	1	1
4325996	TGCAGGTGGCGTTGTCGTAGCCGCTCCCGGCCGATGCGAAGCTGACACCGAGATCGGAAGAGCGGTTCA	1	1	1	1	-	1	1	1	1	1	1	-	1	1	1	1	-	1	0	1	1	1	1	1	1	1	1	1	1	1	1	1	1	1	1	-	1	-	1	1	1	1	1	1	1	0	1	1
4264108	TGCAGGAACCGCCCATGCTTGCCAAGAGTCAGCCATTCCGGCAAACCCCGCCTGATTGACCACCGAGAT	1	-	1	1	1	1	1	1	1	1	1	1	1	1	1	1	1	1	1	1	1	1	1	1	1	1	1	1	1	1	1	1	1	1	1	0	-	1	1	1	1	-	1	1	-	-	1	0
4304956	TGCAGCTGAGCAGACGATGAGGCTGGGAGCATTTTGGTAGCAATCAATTCACACCGAGATCGGAAGAGC	1	1	1	1	1	1	1	0	1	-	1	1	1	1	1	-	1	1	1	-	1	1	1	1	1	1	1	-	1	1	1	0	1	1	1	0	1	1	-	1	1	1	1	1	1	1	1	1
4305493	TGCAGCCCCACGTCGCTAAACACCACCGTGAGGAAAACCACCGCGGCGAAGAAGGAGTGCACGAAGTCC	1	1	1	1	1	1	1	1	1	-	1	1	1	1	1	-	1	-	-	-	1	1	1	1	1	1	1	-	0	1	1	-	1	1	1	1	1	-	1	1	1	1	1	1	1	1	0	1
4278888	TGCAGCAGTCCTCTAGAATGTCGGCCCCATTCAGTCGCAAGTTTGTTGCAGAACTGATGAAAGCAGAGT	1	1	1	1	-	1	1	1	1	1	1	-	-	1	1	-	-	1	1	0	1	1	1	-	1	0	1	1	1	1	-	-	1	1	1	0	1	-	1	1	1	-	1	1	-	1	1	1
4278322	TGCAGTCCTACCCTACGGGCTACTACCTCGACGACGGCGGCGACTTCAGGAACCTGACTCTCTTCAGCA	1	1	1	1	-	1	1	0	1	1	1	0	1	1	1	1	1	1	0	1	1	1	-	-	1	1	1	1	1	1	1	-	1	1	-	1	1	1	1	1	1	1	0	1	1	1	1	1
4263654	TGCAGCAATCCTTGAGTACCTCACTGCCGAGGTCCTTGAGCTGGCCGAGATCGGAAGAGCGGTTCAGCA	1	1	1	1	0	1	1	1	1	1	1	-	1	1	1	1	1	1	1	1	1	1	1	1	1	1	1	1	1	1	1	1	1	1	-	0	1	1	1	1	1	1	1	1	-	0	1	1
4274573	TGCAGGTGCAGGAGAGGCCGGAAGGGATCCGTGTTCCGAGATCGGAAGAGCGGTTCAGCAGGAATGCCG	-	1	1	1	1	1	1	1	-	1	1	1	1	-	1	1	0	1	1	1	1	1	1	1	1	1	1	-	1	1	1	1	1	1	1	1	1	1	1	1	1	1	-	1	1	1	0	1
4311548	TGCAGAACTACTACATGGTACGTCCTACGCTGCTGCTGATTGTCCTCTGCTCCTGTAGCTTGCGTGCAG	1	1	1	1	1	1	1	1	1	1	1	1	1	1	1	1	1	-	0	1	1	1	1	1	1	1	1	1	1	1	-	-	1	1	1	1	1	1	1	-	1	1	1	1	1	1	-	-
4270137	TGCAGCACCTCAGACCCGCCCACCACGGCCACCAATGCGCCCGCAGCATGCTCAGCCGCGCGCCCGAGA	1	-	-	1	1	-	-	1	1	1	1	-	1	1	1	-	1	-	1	1	1	-	0	1	1	1	0	1	1	-	1	1	1	1	1	1	1	-	0	-	-	1	1	1	1	1	-	1
4269199	TGCAGGCATTTCCGCAGCCCGCCGCGGCAACGTAGGCATCGCAAATCGACGCCGAGATCGGAAGAGCGG	1	1	1	1	1	1	1	1	1	1	-	1	1	1	1	1	1	1	1	1	-	1	1	1	1	1	1	-	1	1	1	1	1	1	1	1	1	1	1	1	1	1	1	1	1	1	-	1
4285771	TGCAGCAACAATAGCCGTAGCTCCTGGTATCATTCCTGCCGAGATCGGAAGAGCGGTTCAGCAGGAATG	0	1	1	-	1	1	-	1	-	1	1	1	1	1	1	1	-	1	1	0	1	-	-	1	1	1	1	1	1	1	1	1	1	1	1	1	1	-	0	-	1	1	1	1	1	0	1	1
4263548	TGCAGCGGATGGGCTTGTCGGTGCCGGTGGCCTTCCAGTAGCCGAGATCGGAAGAGCGGTTCAGCAGGA	-	-	1	1	-	1	1	1	1	1	1	1	1	1	1	1	1	1	1	1	-	1	1	1	-	1	1	1	1	1	1	1	1	1	1	1	1	1	0	1	1	1	1	1	1	1	1	1
4271635	TGCAGCTTGCCCCAACGGCCCACGCGGCGCCGAAGCCTGCTGCCCCGCACGCCGAGATCGGAAGAGCGG	1	1	1	0	1	1	1	1	-	1	1	1	1	1	1	1	1	1	1	-	1	1	1	1	1	1	1	1	1	1	-	1	1	1	1	1	1	1	1	1	1	1	-	0	1	1	1	1
4275873	TGCAGTCTTTCCCTCAAGTTTTGCGTCATGAGGGATTGCAAGACCAAAGGCGAGTTCTGGAAGTGGAAA	-	1	-	1	1	1	1	1	1	-	1	1	0	1	1	1	0	1	1	-	1	1	1	1	1	0	1	1	1	-	1	1	1	1	1	1	1	1	1	1	1	1	1	-	1	-	-	-
4280965	TGCAGCATCGATGACCTCTCCGGCACCAACTCCTGCTTCCAATCGCGCAACCGGAACCTCAATCTTCAT	1	1	1	1	1	1	1	-	-	1	1	1	1	1	1	1	1	1	-	1	1	-	-	0	-	1	1	1	1	1	1	1	-	1	-	1	1	0	1	-	1	1	1	1	1	1	-	1
4290159	TGCAGCTGTCGCGCCGCATGGCCGAGTACGAGGAGCGCTACGAGGGCAACGCCGCCGCCGCCGCCGTCA	1	1	1	1	1	1	-	1	1	1	1	1	-	-	1	1	1	1	1	1	1	1	-	1	1	1	1	1	1	1	1	1	1	1	1	1	1	1	1	-	1	1	1	1	1	1	1	1
4282501	TGCAGCTTGACGCTGAAGGCAGCAACAGCAACAACTACAGGGCCATGCAGCAGATCACCTGGGCTGCCG	1	0	1	1	1	1	1	1	1	1	1	1	1	1	1	1	1	1	1	1	1	1	1	1	1	1	1	1	1	1	1	1	1	1	1	1	1	-	1	1	1	1	1	1	1	1	1	1
4283892	TGCAGGGGTGTCCCAACTTAGCCCATTATAAGCTCTCACGGTCAACGAAGGATATTCCTTCTACCGGGA	1	1	1	-	1	1	1	-	-	-	1	1	1	1	-	1	1	1	1	-	-	1	1	1	1	1	1	1	1	1	1	1	1	1	1	1	1	1	1	1	1	1	1	-	1	1	1	1
4286768	TGCAGGGCTTTGGTCGGTTTTGGCTCTCCTCCGCCTGGCCGAGATCGGAAGAGCGGTTCAGCAGGAATG	1	-	1	1	1	-	1	1	1	1	1	1	1	1	1	1	1	1	1	-	1	1	1	1	1	1	-	1	1	1	1	1	1	1	1	1	1	1	1	1	1	1	-	1	1	0	1	1
4305103	TGCAGCCATTCTCTGTTCTCAACACTGTTCTTGCGTACTGGTTGCTTAGCATGCACCCGAGATCGGAAG	1	-	1	1	1	1	1	1	1	1	1	1	1	1	1	1	1	1	1	1	1	1	1	-	1	-	1	1	1	1	1	1	1	1	1	1	1	1	-	-	1	1	-	1	-	-	1	0
4295642	TGCAGTTTTTTTTGGACCCCCTCCATGGCCCCTATCCCGAGATCGGAAGAGCGGTTCAGCAGGAATGCC	1	1	1	1	0	1	1	1	1	1	1	-	1	1	1	1	1	1	1	1	1	1	1	-	1	1	1	0	1	1	1	-	-	1	1	1	1	1	1	1	1	1	-	1	1	0	-	1
4301207	TGCAGCCCACCACGGCTTGTGTGTTCCAGTGAGCAACCCCGTTCATGGAATGAGAAGAAGCCACCAGAA	1	1	1	1	1	1	1	0	1	1	-	-	1	1	1	1	-	1	1	-	1	1	1	-	-	0	1	1	1	1	1	-	1	1	1	1	1	1	1	1	1	1	1	1	1	1	-	1
4286246	TGCAGGTAGTCGGCGAGCCAGGAGGCCTGCTGCTCCTGCTGCTGCATCCCCGAGATCGGAAGAGCGGTT	1	1	1	-	1	-	1	1	1	1	1	1	1	1	1	-	1	1	1	1	-	1	1	1	1	1	1	1	1	1	1	0	1	1	1	1	1	1	1	-	1	-	1	1	-	0	-	-
4303644	TGCAGCTCCCTCCGAGGTGCCTCCGCTGCTTGTGCCCGCGTCACTTGTGTGCAGCGGCCGCGGCCGCCG	1	1	1	1	1	1	1	1	1	1	1	-	1	1	1	1	1	0	1	1	1	-	1	1	-	1	1	0	-	1	-	1	1	1	1	1	1	1	1	1	1	1	1	-	1	-	1	1
4288186	TGCAGGAGAAGATCGAGAAGCTGCCGGAAGTGGAGCGGGCGTTCGTCCATGCGGACTTCGAGAGCACCC	1	-	1	1	1	1	1	0	1	1	1	-	1	1	1	1	1	1	1	1	1	1	1	1	0	1	1	1	1	1	1	-	1	1	1	1	-	1	1	1	1	1	1	1	1	-	1	1
4296965	TGCAGCGCGCGCAGAGGAAGCTACGGGAGAAGGAGCGCGAGGTGTCCCGAGATCGGAAGAGCGGTTCAG	1	1	1	1	1	1	1	-	0	0	0	1	1	1	1	1	1	1	1	1	1	1	1	1	1	1	1	1	1	-	1	1	-	1	1	0	1	1	1	1	1	1	1	1	1	1	1	1
4263928	TGCAGGGCCGGCATCCCCAGCACGAACTCCGGCAGCCCGCCGGTGAGGCTGTTGTTCCGAGATCGGAAG	1	1	1	-	1	1	1	1	1	1	1	1	1	-	1	1	1	1	1	1	1	1	1	1	1	1	1	-	1	1	0	1	-	1	1	1	1	1	1	1	1	1	1	1	1	1	1	1
4287938	TGCAGTGCTTTGGTTGGCTGGCAGAAGCGGAGGGGCCGAGATCGGAAGAGCGGTTCAGCAGGAATGCCG	1	1	1	1	1	1	1	1	1	1	1	1	1	1	-	1	1	1	1	1	-	0	1	1	1	1	1	1	-	1	1	1	1	1	1	1	1	1	1	1	1	-	-	1	1	1	1	-
4296311	TGCAGTGGGCGATGGCGGAGCTGGTGAAGAACCCGGGAGCGATGCGCAAGGCGCAGGAGGAGGTCCGAG	1	1	0	1	1	1	1	1	1	1	1	1	1	1	1	1	1	0	-	1	1	1	1	1	1	1	1	1	1	1	0	1	-	1	1	1	1	1	1	1	-	1	1	1	1	-	1	1
4279400	TGCAGGCCCAGCGTAAGCGACACATCGCCGGAGACCGCGCCGAGATCGGAAGAGCGGTTCAGCAGGAAT	-	1	1	1	-	1	1	1	1	1	0	1	1	-	1	1	1	1	0	1	1	1	1	1	0	1	1	1	1	1	1	-	1	1	1	1	1	1	1	-	-	1	1	1	-	1	1	1
4286542	TGCAGATGCGTCGGCGCAGCTCCCGGCTCCGGCTCCGAGATCGGAAGAGCGGTTCAGCAGGAATGCCGA	1	0	1	0	1	1	1	1	1	1	1	1	1	1	1	1	1	1	1	-	1	1	1	1	1	-	1	-	-	1	0	1	1	1	-	1	1	1	1	1	1	1	1	1	1	1	1	1
4273957	TGCAGAATCGAAGGCTGACCTCCAGTCCTCACCAGGGTGGCCAGGTGTCCGAGATCGGAAGAGCGGTTC	1	1	1	1	1	1	1	1	1	1	1	1	1	1	1	1	1	1	1	1	1	1	1	1	1	1	-	1	0	1	1	1	1	1	1	1	1	1	-	1	1	1	1	1	1	0	1	-
4276662	TGCAGAAGGTGGTGGTGAAGCTGGACCTGCACGACGACACGCGGAAGCGCAAGGCGATCAAGGCCGTCT	1	-	1	1	1	1	1	0	1	1	1	-	-	1	1	1	1	1	1	1	1	1	1	1	-	-	1	-	1	1	1	1	1	1	1	-	1	-	1	1	1	1	1	1	1	0	1	1
4303376	TGCAGGGAGAGACATATCTCTACAAATATGAGAGGGTTCGAGAGGAGAGGCGTCCGAGATCGGAAGAGC	1	1	1	1	1	-	1	1	1	1	-	1	1	1	1	-	1	1	1	1	1	-	-	1	1	1	-	1	-	1	1	1	1	1	1	0	1	1	1	1	1	1	-	-	1	0	0	1
4273477	TGCAGCTCGGAGAAGTGCAGGATGCAGACGTACCCGGGATCCGAGATCGGAAGAGCGGTTCAGCAGGAA	-	-	1	1	0	-	1	1	1	1	1	1	1	1	1	1	1	1	1	1	1	1	1	1	1	1	1	0	1	1	1	-	1	-	1	1	1	1	1	-	1	1	1	1	1	0	1	1
4297016	TGCAGGGTTTGGAGTTGAAGATACTGGGGAGGCCTACTTCTTCAGGGAACGTGACCACCGTGCCTGTGG	1	1	1	1	1	1	1	1	1	0	1	1	1	1	1	-	1	1	1	-	1	0	1	1	-	1	1	1	1	1	1	-	1	1	1	1	1	1	1	-	1	1	1	1	1	1	0	1
4312659	TGCAGTACCTCGGCGATGGCGCAGTCGACGTCGTCCACGTCGTCCCGAGATCGGAAGAGCGGTTCAGCA	1	-	1	1	1	1	1	1	1	1	1	1	-	1	1	1	-	1	1	-	1	1	1	1	1	1	-	1	1	-	0	1	1	1	1	1	1	1	1	1	1	1	-	1	1	1	0	1
4273689	TGCAGGATCCCTCCGGCCTTGTGCTCCTCCCTCGTGGGCTGGAAATGCCCACCAGCGGCCGCGCCGAGA	1	-	-	1	0	1	1	1	1	1	1	1	1	1	1	1	1	1	1	1	1	1	1	1	1	-	1	-	1	1	1	-	1	1	1	1	1	1	1	1	1	-	1	1	1	1	1	-
4290687	TGCAGGTACGGCATATGGGCCACGTCCGGCTCGCCCACCACCCGAGATCGGAAGAGCGGTTCAGCAGGA	1	1	-	1	1	1	1	1	1	1	1	1	1	1	1	1	1	1	0	1	1	1	1	1	1	1	1	1	1	1	1	1	1	1	1	0	1	-	1	1	1	1	1	-	1	0	1	1
4273350	TGCAGCTGCGACCCCGTCGGAGGGGAGCCCGTCGTGCACCTCACTTACGTCGCGCCTGCCGAGATCGGA	1	1	1	1	-	1	-	1	1	1	1	1	1	1	-	1	-	1	1	1	1	1	1	1	1	1	0	1	1	1	-	1	1	1	1	1	1	1	1	1	1	1	1	-	1	-	1	1
4325538	TGCAGAAGACGAAAGGGGTAGACAGGGACTCCCAAACCTTGCCCAGGACGCACTTGGCCATCCTCAGCA	0	-	1	1	1	1	1	1	1	1	0	1	1	1	1	1	1	1	1	1	1	1	1	1	-	1	1	-	1	1	1	1	1	1	1	1	1	1	-	1	1	1	1	1	-	1	1	-
4290214	TGCAGGACCAGGATGCCCCAGAGCAGTCCGACGACGTGTGAGATCACACCCTGCCACGCCTAATCTCCC	-	1	1	1	1	1	1	1	1	1	1	1	1	1	1	1	1	1	1	1	1	1	1	1	1	1	1	1	-	1	1	1	1	1	1	1	1	1	1	1	1	1	1	1	1	1	1	1
4297248	TGCAGCGTGCGGACCGACAAGTCTCAGCCAGCCTTTCCCGAGATCGGAAGAGCGGTTCAGCAGGAATGC	1	-	1	1	1	1	-	1	1	1	-	1	-	1	1	1	1	1	-	0	1	1	1	1	-	1	1	1	1	1	1	1	-	1	1	1	1	0	1	1	1	-	1	1	1	1	0	1
4293337	TGCAGCGGCCTCTTTCGCCCCGAAGGAGCATTTCTTCACATGCCATTTTGTCACGGCCATGCTAACAGC	1	1	1	1	1	1	1	1	1	1	1	1	1	1	1	1	-	1	-	1	1	1	-	-	1	0	1	1	1	1	-	0	1	1	1	1	1	1	1	1	1	1	1	1	1	1	-	1
4326654	TGCAGCCCTACGAACTACGCAACCGAATGCGCTTGTTCTCATGCTCTCTCTTGAAGAAGAGAATGACGA	1	1	1	1	1	1	1	-	1	1	1	1	1	1	1	1	1	1	1	-	1	1	1	-	1	1	1	1	1	1	-	1	1	-	1	-	1	1	1	1	1	1	1	1	1	1	1	1
4273876	TGCAGCAGTCCAACAGATGGACGCGCTCATGGTTGGGCAGGAAGGAGCAAGAGGTGTCGATCGGAGGGC	1	1	1	1	1	1	1	1	1	1	1	1	1	1	1	1	1	1	1	-	1	1	1	1	1	1	1	-	1	1	-	0	1	1	1	1	1	1	1	1	1	1	1	1	1	-	0	1
4267336	TGCAGGCCGCCGCTCTTGGCGATGTAGCTTAAGGCGTCGTTGACGTAGCCACTATCGCAGTTGCTGGGG	1	1	1	1	1	1	1	1	1	1	1	1	1	1	1	1	1	1	1	1	1	1	1	1	-	1	1	1	1	1	0	1	1	1	-	-	1	1	1	1	1	1	1	1	-	-	1	1
4285988	TGCAGCTCCTTCTCCAACCGCTTCTCCGAGGACTCCGACTTCGTCCGAAGCCTCGCCTCCAACTGCTCC	-	1	1	1	1	1	1	1	1	1	1	1	1	1	1	1	1	1	1	1	1	1	1	1	1	1	1	-	1	1	1	1	1	-	1	-	-	1	0	1	1	-	1	1	1	1	1	1
4287931	TGCAGGTGGCGGACATGCACTACGCGGACGGGCGGAGCACCGCGTGCGAGGACGTGCTGCCCGAGCAGG	-	1	-	0	1	0	1	1	1	1	1	1	1	0	-	1	0	0	1	1	-	1	-	1	-	-	-	1	-	-	1	1	1	1	1	1	-	1	1	1	-	1	1	1	1	1	1	1
4267012	TGCAGATGATGAACACACCGTCGCCGCTGTCGCAGACGACGCGGGCGCAACCGATGGCCGTCGAGTCGC	1	1	1	1	1	1	1	1	-	-	-	1	-	1	1	1	1	-	1	-	1	1	1	1	-	0	1	-	1	1	1	1	-	1	-	0	1	0	1	1	1	1	-	1	1	1	1	1
4308549	TGCAGGCCTTCGTCCCCGATCTCGAGGTCGCCGTCGCCGACCTGCTCGCCTTCTTCCGGTCCGTCCCAG	1	1	1	1	1	1	1	1	1	-	1	1	1	0	1	1	1	1	1	-	-	1	1	1	1	1	1	1	1	1	1	-	1	-	1	0	1	1	1	1	-	1	1	1	1	1	1	1
4276913	TGCAGCTTGGCATGGGTGGCGCCCTGCGGCGTGTTGAAGCTGTTGATGAGGTGCGCCGTGGCCGTGCCG	1	-	0	1	1	1	1	-	1	1	1	1	1	1	1	1	1	1	1	1	1	1	1	1	1	1	-	1	1	1	1	1	1	1	1	1	1	-	1	1	1	1	1	1	-	1	1	1
4298811	TGCAGGTGAGGCGGTGGACAATGCGGTCGATGCAGTCCTGGGCGTCGTGCGCCAGGCCGAGCATCTCCT	1	1	1	1	1	1	1	1	-	1	1	1	1	1	1	1	1	1	1	1	1	1	1	1	1	1	1	-	1	1	1	1	1	1	1	1	1	1	1	1	1	1	-	1	1	1	1	1
4265151	TGCAGCGCCTCCTTGTTCAGCGCCTTCCCCTCCAACGCCTGTCACTTTGCCTCGTTCGTCAGAACCCAC	0	1	1	1	1	-	1	1	1	1	-	1	1	-	1	1	1	1	1	1	1	-	1	1	1	1	1	-	1	1	1	1	1	1	1	1	1	1	0	1	1	1	1	1	1	-	0	-
4287430	TGCAGGCAGGCAAACCATCACCAAATCGCTGAAAGCATTCACCCGAGATCGGAAGAGCGGTTCAGCAGG	1	1	1	1	1	1	1	1	1	1	1	1	1	1	-	1	1	1	1	1	1	1	1	1	1	1	1	1	1	-	-	1	1	1	1	1	1	-	1	1	1	1	1	1	-	1	1	1
4293929	TGCAGCAATGTCTGATCGATCTTCATTGTTCCTCGTCGTGGAATGTCCGAGATCGGAAGAGCGGTTCAG	1	-	1	1	1	1	1	1	1	1	1	0	0	-	1	1	1	1	1	1	1	1	-	1	1	1	1	1	1	1	-	1	1	1	1	0	1	0	1	1	1	1	1	-	1	1	1	1
4290340	TGCAGGTGCGCCACGACCTCGGCCGCCAGGATATGGTACGCGTCCGAGATCGGAAGAGCGGTTCAGCAG	1	1	1	1	1	1	1	1	1	1	-	1	1	1	1	1	1	1	0	1	1	1	1	0	1	1	-	0	1	-	1	1	1	1	1	1	0	1	1	1	1	1	1	1	-	1	1	0
4277191	TGCAGGTTGGTGAGGCCACCGAGATCTGAAGAGCGGTTCAGCAGGAATGCCGAGACCGATCTCGTATGC	1	-	1	1	1	1	1	-	1	1	1	-	1	1	1	1	1	-	1	1	1	-	1	1	1	1	1	1	1	1	1	1	1	1	1	-	1	1	1	1	1	1	1	1	1	1	1	-
4294069	TGCAGGTCCCGCACCACTCTGGCGCTCGCAGATGTCGCCGTCTTATCCGAGATCGGAAGAGCGGTTCAG	1	-	1	1	1	1	1	1	1	1	-	1	1	1	1	1	1	1	-	1	1	1	1	1	1	1	1	1	1	-	1	1	1	1	1	1	1	1	1	1	1	1	1	1	1	1	1	1
4281912	TGCAGTGACATGTCCCTGGACGAGATGGACGCCGCGGTGAGGAGGATGGAGTTCGTTGTCTTCGACCGA	1	1	1	1	1	1	1	1	1	1	1	1	-	1	1	1	1	1	1	1	1	1	1	1	1	1	1	1	1	1	1	1	1	1	1	1	1	1	1	-	1	1	-	1	1	1	1	1
4291733	TGCAGGTCCTCCATCCCGGCGACGGCCAGACCTGGGTCACCGCGCGCGACGAGCCGAGATCGGAAGAGC	-	1	1	1	1	1	1	1	1	1	1	1	1	-	1	1	1	1	1	-	1	1	1	1	1	1	1	1	1	1	1	1	1	1	1	1	1	1	1	-	1	1	1	1	1	1	1	1
4284296	TGCAGTTGGGCGGCGCGGGAGAGAAGATGCTCACGGTCCGAGATCGGAAGAGCGGTTCAGCAGGAATGC	1	1	1	1	1	1	1	1	-	1	1	-	1	1	1	1	1	1	1	1	1	1	1	1	1	1	1	1	1	1	-	-	1	1	1	1	1	-	1	1	1	1	1	1	1	1	1	1
4270159	TGCAGCTCGTCTCCGAGTCTCCATAACGGACTTGATCAGCCGAGATCGGAAGAGCGGTTCAGCAGGAAT	1	-	1	1	1	1	1	1	1	1	-	-	1	1	1	1	-	1	-	1	1	1	1	1	1	1	1	1	1	1	1	1	1	1	1	1	1	1	1	1	1	1	1	1	-	1	1	1
4286014	TGCAGCACGGCCAAACGATGGTGGGTGAAAGCTACAGGCCGAGATCGGAAGAGCGGTTCAGCAGGAATG	1	1	1	1	1	1	1	1	1	1	-	1	1	1	1	1	1	1	-	1	1	1	1	1	1	1	1	1	1	1	1	1	1	1	1	1	1	1	1	1	1	1	1	1	1	-	1	1
[truncated: 45,778 more rows]
[truncated: 38 more columns]
